# Supplementary material for: An automatic approach for classification and categorisation of lip morphological traits
Source: PLoS One. 2019 Oct 29;14(10):e0221197. doi: 10.1371/journal.pone.0221197 (PMC6818784; doi:10.1371/journal.pone.0221197)
Supplement: S8 Table — (XLS) [file pone.0221197.s008.xls]

## Sheet: Sheet1
Individual ID
70118187		0.00248877	0.00253466	0.0033829	0.0054226	0.00789872	0.0104195	0.0106848	0.0132232	0.0156192	0.0145139	0.0207359	0.0250818	0.027549	0.0277487	0.0300872	0.0274549	0.0244032	0.0237176	0.0231031	0.0246348	0.0268341	0.0287299	0.0296378	0.0285172	0.0239444	0.0196172	0.0165933
70118634		0.00158428	0.00161669	0.0017178	0.00178818	0.00186931	0.00191707	0.00176142	0.00240255	0.0035773	0.00294354	0.00468948	0.00666661	0.00884374	0.00947905	0.011361	0.0124661	0.0138406	0.016755	0.0198535	0.0231842	0.0265727	0.0298936	0.0312347	0.03029	0.0282292	0.0252587	0.023346	0.021827
70118704		0.00298089	0.00333773	0.00346764	0.00330463	0.0033558	0.00391975	0.00481064	0.00593901	0.00739394	0.00947312	0.0117768	0.014456	0.0152131	0.0185663	0.0214985	0.0234935	0.0240568	0.0245623	0.0245276	0.0249309	0.0241705	0.022291	0.0203777
70119011		0.00403633	0.00444198	0.0052045	0.00632967	0.00796365	0.00828098	0.0124869	0.0185638	0.0229413	0.0263573	0.0289073	0.0330667	0.0348263	0.0383008	0.0380215	0.0348407	0.0303523	0.0243286	0.019256	0.0164873	0.013766	0.0133547	0.0161005	0.0156284	0.0156899	0.0152281
70119862		0.0037159	0.00324706	0.00330369	0.00299352	0.00346198	0.00444532	0.00637921	0.00869698	0.0117651	0.015231	0.0184816	0.0191417	0.0205329	0.0223846	0.0229075	0.0245998	0.0264591	0.0284772	0.030104	0.027857	0.02718	0.0240227	0.0216881	0.0206112	0.0193355
70120239		0.00662537	0.00583946	0.00512388	0.00489129	0.00466447	0.00517362	0.00494536	0.00475071	0.00444853	0.00411986	0.00431184	0.00383664	0.00372661	0.00361762	0.00384167	0.00371765	0.00474578	0.00376362	0.00581384	0.00783768	0.00747968	0.009092	0.0106563	0.0118905	0.0128432	0.0140356	0.0144757	0.0152341	0.0163143	0.018933
70120476		0.00445253	0.00408741	0.0038254	0.00421112	0.00530819	0.00449413	0.00677378	0.00725613	0.00917594	0.0122752	0.0143975	0.017572	0.0202439	0.0212508	0.0229894	0.0235871	0.0237578	0.0248421	0.0260867	0.0284659	0.0301532	0.032258	0.0340088	0.0351866	0.0343137	0.0309301	0.0264406	0.0234063	0.0214984
70121914		0.00960661	0.00925113	0.00873184	0.00765809	0.006507	0.00675111	0.00626141	0.00550664	0.0043074	0.00378978	0.00424039	0.00203726	0.00173319	0.00260627	0.00277599	0.0036631	0.00648716	0.0101152	0.00968525	0.0123781	0.015276	0.0138901	0.016947	0.017193	0.0210212	0.0256926	0.022602	0.0268763	0.0283705	0.0290409
70122151		0.00304163	0.00288746	0.00283924	0.00233359	0.00176978	0.00207129	0.00185766	0.00497321	0.0086114	0.011245	0.0139393	0.0147916	0.0155585	0.0152961	0.0177998	0.0205889	0.0224662	0.0260659	0.0303967	0.0321503	0.0311345	0.0326905	0.0302985	0.0283681
70122458		0.00344751	0.00261137	0.00263791	0.0027129	0.00348266	0.00403884	0.00466112	0.00494323	0.00524746	0.00550803	0.00609433	0.00734406	0.00817493	0.00886891	0.0111793	0.0135856	0.0165301	0.0190009	0.0213541	0.0241197	0.0265683	0.0277207	0.0288383	0.0286773	0.0286915	0.0271838	0.0273075	0.0268949
70122765		0.00430265	0.00406153	0.00379093	0.00340699	0.00287149	0.00231544	0.00147646	0.00112495	0.00193982	0.00376977	0.00640319	0.00971579	0.0123883	0.0146176	0.016323	0.0176135	0.0184284	0.019281	0.0205336	0.0233834	0.0259555	0.0279545	0.0279689	0.0254934	0.0223825	0.0223179	0.0201685	0.0184816
70123379		0.00323537	0.00356091	0.00347473	0.00339446	0.0040679	0.0046561	0.00642854	0.0085645	0.0122957	0.013146	0.0159478	0.0184622	0.0211666	0.0236883	0.0254286	0.0248646	0.0242321	0.0206284	0.0184105	0.019109	0.0184824	0.0193943	0.0193347	0.0187074	0.0179556	0.0175122	0.0172459	0.0171257	0.0153496	0.0126222
70123686		0.00334496	0.00285157	0.00275185	0.00293432	0.00309586	0.00441032	0.00504725	0.00886935	0.0128304	0.0113545	0.0145019	0.0171259	0.0190006	0.02042	0.0241243	0.0258231	0.0274344	0.0266608	0.0229981	0.0201001	0.0198108	0.021316	0.0232786	0.0236796	0.0221933	0.0210165
70124063		0.00366603	0.00490943	0.00608281	0.00724363	0.00865043	0.0128503	0.0152899	0.0173291	0.0192691	0.0207174	0.0213421	0.0210836	0.020789	0.018913	0.0161416	0.0162812	0.0160608	0.0169011	0.0179099	0.0181784
70124510		0.00577259	0.00683144	0.00765962	0.00816287	0.0092848	0.0103281	0.00976574	0.0108678	0.0114346	0.0111625	0.0115467	0.0119102	0.0120673	0.0128487	0.012394	0.0128571	0.0139533	0.0165768	0.0199316	0.0215644	0.0225136	0.0226619	0.0239532	0.0245097	0.0247471	0.0241849	0.0238142	0.0218423
70124747		0.00546198	0.00598986	0.00615011	0.006118	0.00637966	0.00585435	0.00671507	0.0075805	0.00868202	0.0100562	0.0114012	0.013526	0.0151803	0.0142759	0.0146373	0.0166728	0.0165318	0.0181139	0.0211692	0.0253081	0.0273413	0.0278505	0.0261047	0.025192	0.022764	0.0219515	0.0215119	0.0210296
70126422		0.00354617	0.00288286	0.00258749	0.00271265	0.00355141	0.00413719	0.00446495	0.00432872	0.00594916	0.00731938	0.0100008	0.013961	0.0131156	0.0149089	0.0157838	0.0175911	0.0207979	0.0254986	0.027541	0.0263074	0.0270955	0.02708	0.0285654	0.0286976	0.0281922	0.0249853	0.0209692
70127036		0.00140563	0.00112802	0.00093808	0.00118727	0.00210454	0.00328654	0.00372708	0.00479433	0.00603407	0.00712	0.00849639	0.0100216	0.011782	0.0125965	0.0134164	0.013926	0.0164026	0.0170626	0.0191977	0.0222572	0.0242136	0.0239564	0.0236925	0.0229926	0.0217548	0.0203569	0.0188006	0.017176	0.0149854	0.012431
70127273		0.00478668	0.00525342	0.00547238	0.00539144	0.00486443	0.00418158	0.00403292	0.00508574	0.00720442	0.00726797	0.00874001	0.0118507	0.0148905	0.0175479	0.0198351	0.0223987	0.0254997	0.0278509	0.0279287	0.0279423	0.0267285	0.0254537	0.024039
70127887		0.00284957	0.00211804	0.00224192	0.00254058	0.00356392	0.00421912	0.0045376	0.00441235	0.00477386	0.00437881	0.00524342	0.00760298	0.0114934	0.0148367	0.0130584	0.0142331	0.0165816	0.0196503	0.0228488	0.0245312	0.0258944	0.0271363	0.0275089	0.026272	0.0252025	0.0233874	0.0231222
70128404		0.00356997	0.00320457	0.00297747	0.00287638	0.00297589	0.00318495	0.00424341	0.00520573	0.00658007	0.00869878	0.0101871	0.0123991	0.0147991	0.0170986	0.0196239	0.0222949	0.0238321	0.0236956	0.0222966	0.0210161	0.0184857	0.0199844	0.0205387	0.0186652	0.0183556	0.0188404	0.0164575	0.0157504
70128571		0.00148346	0.00170647	0.00183791	0.00256143	0.00307812	0.00343966	0.00366645	0.003711	0.00408091	0.00490666	0.00600494	0.00723558	0.00858745	0.0114758	0.0145543	0.0173435	0.0208994	0.0246309	0.0277711	0.0294491	0.0293869	0.0279884	0.0260996	0.0241994	0.0235801	0.022228	0.022773
70128948		0.00232573	0.00274121	0.00325453	0.00392762	0.00450021	0.00473368	0.0060824	0.00917831	0.0125057	0.0156579	0.0178092	0.0191578	0.0199386	0.0216571	0.0220087	0.022235	0.0221996	0.0242841	0.0249334	0.0259264	0.0252468	0.0244165	0.0237319	0.0234765	0.0229035	0.0218642	0.0189183	0.0168481
70129185		0.00199485	0.00263516	0.00344629	0.00449842	0.00483051	0.00532932	0.00529517	0.00577043	0.00673711	0.0082585	0.00987368	0.0118223	0.0138581	0.015193	0.0156182	0.0147501	0.0149168	0.0153227	0.0157786	0.0161036	0.0163438	0.0171031	0.0188292	0.0204421	0.0213624	0.021805	0.0215637	0.0201221
70129325		0.00620114	0.00603705	0.00648878	0.0061652	0.00700466	0.00705037	0.00732404	0.00867897	0.00973782	0.0121992	0.0154021	0.0200161	0.0206541	0.023512	0.0221133	0.0206868	0.0202226	0.0209737	0.0201113	0.0186083	0.0177435	0.0176214	0.0170496	0.0164643	0.0151297	0.0133545	0.0118061
70129632		0.00377651	0.00373635	0.00370644	0.00366389	0.0038493	0.00426086	0.00498809	0.00628837	0.00852088	0.0102977	0.0125194	0.0123043	0.0131262	0.0124173	0.013429	0.0164102	0.0173876	0.0203195	0.0202372	0.0204344	0.0221751	0.0218141	0.021231	0.0208436
70129702		0.00225166	0.0024245	0.00257051	0.00241219	0.00236638	0.00259108	0.00229172	0.00280002	0.00346794	0.00420338	0.00497949	0.00586243	0.00682437	0.00765974	0.00823997	0.00898291	0.00994192	0.012949	0.0163071	0.0207791	0.0242273	0.0261362	0.0268765	0.0269288	0.0266575	0.0253842
70130316		0.00816765	0.00880446	0.00795277	0.00862483	0.0066926	0.00551353	0.00258464	0.00409517	0.00883775	0.00749306	0.0120697	0.014202	0.0188483	0.0224725	0.0259	0.0287674	0.0266052	0.0282213	0.0253803	0.0242848	0.0242612	0.0241322	0.0233972	0.0244598	0.023359	0.0228528	0.019907
70130483		0.00421352	0.00519556	0.00522274	0.00615486	0.00721287	0.0082854	0.00940085	0.0107095	0.0124328	0.0147588	0.0162118	0.0182061	0.0222173	0.0246009	0.0252505	0.0248856	0.023305	0.0226408	0.0214295	0.0210838	0.0212617	0.0193807	0.0182799	0.0158286	0.01281
70130790		0.0027598	0.00235134	0.00251763	0.00311306	0.00357551	0.00466147	0.00678586	0.00917994	0.0116288	0.0125011	0.0147122	0.014996	0.017907	0.0190103	0.0222477	0.0242595	0.0257406	0.0256727	0.0258335	0.0251478	0.0243092	0.0242098	0.0217199	0.0196432	0.0172843	0.0154521	0.0139075	0.0133588	0.0130089	0.0116709
70131097		0.00400388	0.00452853	0.00519634	0.00606791	0.00710363	0.00617192	0.00731182	0.00863135	0.0100037	0.0114096	0.0125702	0.0144482	0.0162904	0.0172441	0.0181622	0.0178654	0.0170066	0.0171121	0.0175607	0.0165431	0.0181468	0.017922	0.0156993	0.015033	0.0144238	0.0146191	0.0145841
70131167		0.0050737	0.00550488	0.00579256	0.00529343	0.00495873	0.0046591	0.00394072	0.00263888	0.00158235	0.00158717	0.00391649	0.00747453	0.0111414	0.0142664	0.0126634	0.0156722	0.0175699	0.016393	0.0179312	0.0230299	0.0270243	0.0302059	0.0317204	0.0314021	0.0300091	0.0287121	0.0279716
70131307		0.00117295	0.00162303	0.00253296	0.00356649	0.00428173	0.00493003	0.00558489	0.00893372	0.0133241	0.0139762	0.0207246	0.022366	0.0267245	0.0264108	0.030894	0.0323365	0.0324383	0.0326535	0.0302573	0.0251245	0.0214335
70132772		0.0021945	0.00140975	0.00134085	0.00202889	0.00310699	0.0025027	0.00388219	0.00539238	0.00740182	0.00919192	0.0108554	0.0124777	0.0136676	0.0150809	0.0174017	0.0192426	0.0195043	0.0194494	0.0188641	0.0189325	0.0199722	0.0204757	0.0203946	0.0204975	0.0198884	0.0183724	0.0185732	0.0169137	0.0182453	0.0185315
70134070		0.00212633	0.00222148	0.00256269	0.00321838	0.00334258	0.00329775	0.00295018	0.00224302	0.00132514	0.00212892	0.00471549	0.00394079	0.0069355	0.0106501	0.0146815	0.018291	0.0209144	0.0225288	0.0246702	0.0259854	0.0269794	0.0259441	0.024247	0.022762	0.021513	0.020538	0.0196563	0.0185303	0.0189204	0.0195946
70134684		0.00541204	0.00484957	0.00427544	0.00385846	0.00345864	0.00345389	0.00382261	0.00395425	0.0038826	0.00354495	0.00346127	0.00460188	0.00730564	0.00749139	0.00851245	0.00954668	0.0112748	0.0123035	0.0143658	0.0158935	0.0184942	0.0191862	0.0192786	0.0182207	0.0180151	0.0184329	0.0192187	0.0186866	0.0181713	0.0168442
70134824		0.00363262	0.00344815	0.00304261	0.00296926	0.00311187	0.00433369	0.00512678	0.00592405	0.00863346	0.0116082	0.0123238	0.0117377	0.015679	0.0153034	0.0180225	0.0165539	0.0181353	0.0212307	0.0226144	0.0240477	0.0261249	0.0275005	0.0277802	0.027573	0.0251202	0.0221341	0.0203278	0.0184383	0.0162058	0.0148991
70134991		0.00115764	0.00049256	0.00119905	0.00162386	0.00197947	0.00250952	0.00328267	0.00393163	0.0047907	0.00525376	0.00565469	0.00610066	0.00664212	0.00731513	0.00700925	0.00746701	0.00781721	0.0091664	0.0117158	0.0155684	0.0187153	0.0204356	0.0208869	0.0210373	0.0238753	0.0259422	0.0276293	0.0302057	0.0317496	0.0308483
70135201		0.00360911	0.0036315	0.0033653	0.00334192	0.00298541	0.0034068	0.00480125	0.00672536	0.0103948	0.0121717	0.0165862	0.0201601	0.0190058	0.0186353	0.0191901	0.0219178	0.0246576	0.0267903	0.0288732	0.0273924	0.0273619	0.0256471	0.0240356	0.0208981	0.0173312
70136052		0.00329903	0.00345315	0.00419047	0.00449055	0.0041419	0.0035281	0.00353288	0.00320986	0.00341407	0.00557991	0.00575925	0.00897946	0.0090604	0.0129221	0.0172796	0.0198808	0.0229466	0.0253673	0.0250783	0.026471	0.0263144	0.0239647	0.0246407	0.0229783	0.0218335	0.0223659	0.0230015	0.0237964	0.0253737
70136289		0.00184198	0.00140677	0.00131584	0.0012175	0.00154954	0.00207468	0.00327608	0.00456407	0.00581508	0.00702566	0.0057559	0.00696301	0.00836517	0.0109999	0.0136044	0.0153843	0.0161067	0.0163575	0.0171171	0.0183361	0.0204785	0.0211305	0.0223018	0.0219841	0.022457	0.0232873	0.0253407	0.0245631	0.0258565	0.0266536
70136359		0.00187219	0.00105161	0.000801189	0.00130745	0.00160734	0.00219377	0.00286143	0.00377987	0.00547016	0.00671531	0.00834108	0.0110086	0.00932289	0.0115636	0.0128898	0.0141786	0.0168223	0.0194831	0.0224762	0.0245124	0.0274116	0.0285572	0.0281498	0.0266687	0.026312
70136736		0.00401004	0.00350358	0.00270282	0.00261896	0.00248925	0.00263346	0.00363761	0.00511444	0.00668892	0.00773309	0.00895214	0.00907	0.011067	0.0126828	0.0135376	0.0134798	0.012718	0.0132388	0.0132974	0.0144092	0.0166227	0.0193249	0.0217042	0.0237604	0.0262157	0.0279953	0.0268913	0.023375	0.0224969
70136806		0.00235701	0.00248815	0.00289013	0.00325499	0.00311567	0.00354709	0.00365915	0.00420764	0.00504585	0.00436343	0.00573032	0.00808689	0.0103449	0.012485	0.0113466	0.0139937	0.0133105	0.0158371	0.0174555	0.0177533	0.0177727	0.0179283	0.0189439	0.0197206	0.0198289	0.019569	0.0189582	0.0183042	0.0181535	0.0180037
70136973		0.00258969	0.00170475	0.00173563	0.00164632	0.00186078	0.0020957	0.00212914	0.00203736	0.00226121	0.00327813	0.00470836	0.00618481	0.00736293	0.00790481	0.00787134	0.00836105	0.00955913	0.0128355	0.0159691	0.0192661	0.0210597	0.0218374	0.024678	0.0244745	0.0248748	0.0249104	0.0228039
70137043		0.000882509	0.00182653	0.00202531	0.0027615	0.00357876	0.00525259	0.00754073	0.0104886	0.010374	0.0127934	0.0120351	0.0136756	0.014689	0.0168106	0.0201236	0.0227864	0.0248585	0.0266224	0.0278882	0.027257	0.0242773	0.0234297	0.0214053	0.0214337	0.0191319	0.017241	0.0159873	0.0157071
70137113		0.00395684	0.00337804	0.00296408	0.00274663	0.00307274	0.00264564	0.00371558	0.00480922	0.00567296	0.00616751	0.00581949	0.00688907	0.00588255	0.00715901	0.00919657	0.00839956	0.0087595	0.0093374	0.00892802	0.0110242	0.0121286	0.0154415	0.0187008	0.0211294	0.0228231	0.0248791	0.0280963	0.0288248	0.0298628	0.0308276
70137587		0.00761571	0.01046	0.0123122	0.0126641	0.0147135	0.0174431	0.0181293	0.0191332	0.0197137	0.020205	0.0233442	0.0256112	0.0275749	0.0271962	0.02603	0.0245841	0.0230126	0.0204931	0.017544
70137657		0.0045011	0.00369059	0.00336831	0.0032898	0.00313371	0.0028669	0.00260011	0.00265141	0.00238457	0.0018133	0.00104613	0.00124759	0.000213573	0.00134403	0.00141991	0.00255334	0.00419514	0.00536422	0.00724237	0.00761054	0.0111536	0.0105739	0.0141576	0.0162428	0.0175601	0.0204695	0.0218931	0.0228194	0.0241701	0.0253897
70137964		0.00468107	0.00507177	0.00536243	0.00579838	0.00586493	0.00555752	0.00586811	0.00537171	0.00414476	0.00327096	0.00317682	0.00437287	0.00554151	0.00580939	0.00763133	0.0106586	0.0144384	0.0170387	0.0193747	0.0181265	0.0203564	0.0194327	0.0213125	0.0230096	0.0235765	0.0240649	0.025537	0.0254191	0.0269157	0.027049
70138271		0.0010602	0.00115194	0.00156786	0.00187842	0.0024071	0.00344227	0.00388474	0.00433962	0.00498243	0.00589645	0.00794931	0.0105791	0.0113605	0.0132638	0.0143097	0.0175114	0.0199678	0.0219748	0.0231509	0.0240587	0.0240726	0.0237389	0.0237912	0.0236821	0.0229245	0.0219626	0.0209773	0.0191009	0.0174793
70138411		0.00331322	0.00335262	0.00334401	0.00347136	0.00373871	0.0039155	0.00335404	0.0025367	0.00262044	0.00435911	0.00705703	0.010082	0.0131899	0.0162724	0.0195567	0.0221798	0.0236769	0.0245176	0.0247707	0.0249271	0.0241489	0.0223784	0.0202406	0.0179216	0.0166601	0.0154559	0.0145223	0.0127913	0.0127475
70139402		0.00572676	0.00528485	0.00483993	0.00476494	0.00467289	0.00465476	0.00445638	0.00418038	0.00395265	0.00416739	0.00538113	0.00690159	0.00702293	0.00926348	0.0092985	0.0112365	0.0123072	0.0148244	0.0158464	0.0170931	0.0175701	0.0183424	0.018887	0.0202972	0.0213961	0.0210077	0.0193643	0.0177806	0.0168046	0.0167036
70139709		0.00302968	0.00262948	0.00255481	0.00293077	0.00334744	0.0045914	0.0044964	0.00641523	0.00901351	0.00934551	0.00921256	0.00919694	0.00961116	0.0105052	0.0126256	0.0150119	0.0165632	0.0176689	0.0197067	0.0213828	0.0232507	0.0253808	0.0243751	0.0220197	0.0210234	0.0219663	0.0237717	0.0243373	0.0235413
70140490		0.00277736	0.00283996	0.00260477	0.0024599	0.00211405	0.00221048	0.00188836	0.00200959	0.00285065	0.00281066	0.00295841	0.00381464	0.00547547	0.00756873	0.0102108	0.0122587	0.0112373	0.0134285	0.0151521	0.016617	0.0205223	0.0230746	0.0253967	0.0294245	0.0282658	0.0285275	0.0258202	0.0213468	0.0178538	0.0161369
70140630		0.00345576	0.00250858	0.00125123	0.000778159	0.00132423	0.0013225	0.00191966	0.00201037	0.00279315	0.00293698	0.00296295	0.00391775	0.0057536	0.00613781	0.00559431	0.00644812	0.00801225	0.00754505	0.00867615	0.00986949	0.0109898	0.0126439	0.015076	0.016543	0.0168717	0.017249	0.0178763	0.0201075	0.0225164	0.0253242
70140867		0.00418885	0.00350535	0.00309383	0.00299103	0.00331858	0.00446041	0.00658687	0.00897958	0.0121936	0.0159784	0.0190868	0.0216493	0.0244947	0.0253706	0.0219784	0.0196322	0.0188407	0.0190009	0.0199738	0.0205363	0.0210428	0.0205968	0.019515	0.0180448	0.0152151
70140937		0.00336961	0.00319555	0.00263957	0.00251825	0.00286177	0.00354862	0.00438295	0.00541419	0.0075747	0.0104215	0.0114712	0.0135006	0.0134803	0.0143136	0.0148228	0.0157956	0.0178874	0.018914	0.0221006	0.0228469	0.0245283	0.0250166	0.0231498	0.0230752	0.0202713
70141007		0.00623385	0.00558561	0.00499602	0.00383568	0.0026398	0.0035189	0.00322585	0.0028356	0.00250543	0.00234946	0.00172061	0.00129018	0.00225013	0.00308383	0.00509587	0.00869157	0.0082938	0.0105107	0.0129366	0.0127706	0.0150893	0.0166565	0.0172874	0.0206512	0.0235485	0.0280953	0.0297661	0.0291503	0.0320653	0.0289689
70141174		0.00646467	0.00593857	0.00530835	0.00483199	0.00504066	0.00432398	0.00339315	0.00444496	0.00326709	0.00304344	0.00486186	0.00891455	0.0114194	0.0137152	0.0184876	0.0197855	0.022638	0.0263065	0.0298149	0.0294436	0.0251797	0.0215668	0.0202792	0.0197189
70142542		0.0012302	0.00147821	0.00185938	0.0027722	0.00334847	0.00376886	0.00388607	0.00341547	0.00292298	0.0033332	0.00480761	0.00673605	0.00835984	0.0112702	0.0141431	0.0188204	0.0232144	0.0272994	0.0293219	0.0328509	0.0351976	0.0345336	0.032985	0.0328708
70142612		0.00331125	0.00289532	0.00328479	0.00417026	0.00497871	0.00579	0.00705794	0.00816749	0.00841348	0.00870169	0.00933954	0.00928144	0.00974506	0.010404	0.0114436	0.0124361	0.0143818	0.0169959	0.0190322	0.0187017	0.0188304	0.0185933	0.0191586	0.0196285	0.0198828
70142849		0.003423	0.00370134	0.00376606	0.00449253	0.00538754	0.00782231	0.0100744	0.0120683	0.0114016	0.0132413	0.0129471	0.0134744	0.0160911	0.0163512	0.0175118	0.0187924	0.0189734	0.0200128	0.0193084	0.0190249	0.0186793	0.0193708	0.0209028	0.021374	0.0222495
70143603		0.00792556	0.00790746	0.00799205	0.00782702	0.00776232	0.00805208	0.0091507	0.0112912	0.0138973	0.0171466	0.0188858	0.0183065	0.0189365	0.0191676	0.0218172	0.0259764	0.0280641	0.0263194	0.0256275	0.0224571	0.021727	0.0199558	0.0193359
70143910		0.011253	0.00884618	0.00600124	0.00397704	0.00349518	0.0047638	0.00802602	0.0120424	0.015849	0.0183385	0.0204336	0.0232016	0.021839	0.022531	0.0224379	0.0226682	0.0240164	0.0261518	0.0275907	0.0283445	0.0262823	0.0250221	0.0221019	0.020753	0.0190256	0.0179173	0.0166022	0.015747
70144454		0.00246303	0.00225306	0.00257883	0.00260783	0.00357022	0.00374027	0.00461785	0.00477276	0.00704517	0.00946492	0.0115521	0.0135284	0.0148973	0.0165339	0.0164164	0.0194863	0.0208184	0.0227643	0.0212522	0.0196122	0.0195654	0.0202987	0.0223022	0.0243919	0.0247348	0.0245239	0.0233508
70144524		0.00268249	0.00272431	0.00343313	0.00406843	0.0037774	0.00463722	0.00432578	0.00427546	0.0049507	0.00539203	0.00682899	0.00891967	0.0115479	0.0121202	0.0138413	0.0162813	0.0183492	0.018293	0.019312	0.0198744	0.0205721	0.0219213	0.0228403	0.0224632	0.0249485	0.0262804	0.0279168	0.0278861	0.0259052
70145138		0.00188827	0.00253887	0.00272419	0.00257373	0.00253414	0.00237889	0.00322813	0.00686002	0.00939571	0.0109409	0.0115044	0.013767	0.0143675	0.0129664	0.013718	0.0151472	0.0160344	0.0181732	0.0196978	0.0217591	0.0229432	0.0220548	0.0218198	0.0223265	0.0228161	0.0219451
70145208		0.00395133	0.00412815	0.00438891	0.00566125	0.00650634	0.00753108	0.00750677	0.00907826	0.0107842	0.011819	0.0127494	0.0144053	0.0177648	0.0188105	0.0215754	0.0246406	0.0252971	0.0234917	0.0254171	0.0257898	0.0263828	0.0258603	0.0245553	0.0238898	0.0227149	0.0228876
70146129		0.00315119	0.0031643	0.00298379	0.00245807	0.0023412	0.00194078	0.00180852	0.00159582	0.00201905	0.00258075	0.00311119	0.00350195	0.0028534	0.00241804	0.00258263	0.00324311	0.00476594	0.00692503	0.0094613	0.00803554	0.0104074	0.0125007	0.0148125	0.0191655	0.0240891	0.027755	0.0287751	0.0274025	0.0231343	0.0206875
70146296		0.00448468	0.0033443	0.00317575	0.0017328	0.000657781	0.000711196	0.000797097	0.00133377	0.00196884	0.00250002	0.0029639	0.00379868	0.00485361	0.00618991	0.00632179	0.00887007	0.0137415	0.0185384	0.0221092	0.0264675	0.0291456	0.0309676	0.0308764	0.032283	0.0326277	0.0307444	0.0300892	0.0278197	0.0241934	0.0204484
70146436		0.00418874	0.0045135	0.00365706	0.00266254	0.00205379	0.00161282	0.00125304	0.001901	0.00423751	0.00603561	0.00770507	0.00868636	0.0117469	0.0150469	0.0205851	0.0186203	0.0199237	0.0202197	0.0230313	0.0241314	0.0248823	0.0246209	0.0242104	0.0230156	0.0208763	0.019806
70147357		0.00302055	0.00365478	0.00506669	0.00653812	0.00743355	0.00752835	0.0101306	0.0125189	0.0151818	0.0173556	0.0190065	0.0196936	0.0214382	0.0205087	0.0212448	0.0207367	0.0210727	0.0218702	0.0220906	0.0208876	0.0208883	0.0203938	0.0212319	0.0215557	0.0210877	0.0200462	0.0187698
70147427		0.00285691	0.00309713	0.00372708	0.00371952	0.00423705	0.00454329	0.00464543	0.00460151	0.00433917	0.00378955	0.00344239	0.00328144	0.0036977	0.00476661	0.00653586	0.00840966	0.0103827	0.0120754	0.0143995	0.0167077	0.0186499	0.0202519	0.022015	0.0241543	0.0247722	0.0238649	0.0231116	0.0228462	0.0214988	0.0201942
70147971		0.00589426	0.00726731	0.00910184	0.0112714	0.0135283	0.0119853	0.0134904	0.0156242	0.0172209	0.0172038	0.0178148	0.0190553	0.0195453	0.0203597	0.0230522	0.0266073	0.0261716	0.0273589	0.0266802	0.0249159	0.0241003	0.0223392
70148278		0.00255587	0.00208456	0.00228703	0.00331831	0.00437341	0.00516844	0.005552	0.00573308	0.00619727	0.00685097	0.00756397	0.00934857	0.0106167	0.0114337	0.0114664	0.0122867	0.0129524	0.0146445	0.0159856	0.0163649	0.0157546	0.0153533	0.016512	0.0178413	0.0194451	0.0198447	0.0204845	0.0201252	0.0207371
70148655		0.00347055	0.00373692	0.00373909	0.00365986	0.00403593	0.0045555	0.00520595	0.00542283	0.00701024	0.00955777	0.0121588	0.0156342	0.018731	0.0215493	0.0233325	0.0243501	0.0235663	0.0226886	0.0224049	0.0221012	0.0219206	0.0208624	0.0194163
70149032		0.00350389	0.0040435	0.00338687	0.00456253	0.00445197	0.00607398	0.00796041	0.0105054	0.0128216	0.0162324	0.018384	0.0203346	0.0179921	0.0188265	0.0194388	0.0206625	0.0219381	0.0240932	0.0255797	0.0256975	0.025161	0.0243075	0.0227672	0.0210025	0.0183162
70149102		0.00374044	0.00442526	0.0053669	0.00638008	0.00841084	0.00951492	0.0111528	0.0127631	0.0141757	0.0154799	0.0167332	0.0173542	0.0178293	0.0183476	0.019438	0.0210061	0.0222301	0.02088	0.019968	0.0182007	0.0175748	0.017179	0.0162624	0.0154497
70149269		0.00422572	0.00421186	0.00405208	0.00352709	0.00415204	0.00335536	0.00226089	0.00292126	0.00664618	0.0100563	0.0110819	0.0141967	0.0177351	0.0212819	0.023854	0.0243494	0.0223594	0.0214907	0.0224608	0.0215775	0.0216843	0.0220389	0.0221982	0.0217251	0.0204187	0.0199367
70149953		0.00618977	0.00586609	0.00544749	0.00522679	0.00440346	0.00353174	0.00311251	0.00335189	0.00389384	0.00361694	0.00499517	0.00861125	0.00860665	0.0153229	0.0181552	0.0208255	0.022997	0.0239559	0.027216	0.0295129	0.0321051	0.0344213	0.035264	0.0351464
70150497		0.00516523	0.00484208	0.00459167	0.00420208	0.00358325	0.00289611	0.0029865	0.00247452	0.0021642	0.00200213	0.00150999	0.00114283	0.00109988	0.00200574	0.00348198	0.00491985	0.00629909	0.0103939	0.0155536	0.0215745	0.02509	0.0279913	0.0292421	0.0301649	0.0305645	0.0306446	0.0293158	0.0282712	0.0261869	0.0246908
70150567		0.00708783	0.00656569	0.00610017	0.00575697	0.00542378	0.00534094	0.00445147	0.00356562	0.00285485	0.00234773	0.00228118	0.00208366	0.00257668	0.00297871	0.00321517	0.00325811	0.00329181	0.00345826	0.00407114	0.00453909	0.0051986	0.00534326	0.00623898	0.00699671	0.00784112	0.00874786	0.00984175	0.00997866	0.0108568	0.0106567
70150637		0.00445266	0.00594353	0.00830092	0.011154	0.00936797	0.0128738	0.0155028	0.017598	0.019106	0.0167795	0.020407	0.0203981	0.0199445	0.02162	0.0236208	0.0253465	0.0272237	0.0296263	0.031404	0.0321392	0.0317344	0.0286932
70150944		0.0025551	0.00248757	0.00245078	0.0026606	0.00301672	0.00313521	0.00324622	0.00340411	0.00359337	0.00383969	0.00399664	0.0045193	0.00517284	0.00585463	0.00642426	0.00724936	0.00836508	0.00945561	0.0101825	0.0125863	0.0142543	0.0155592	0.0162193	0.0176303	0.0177671	0.0177098	0.0181402	0.0176949	0.0181751	0.0167178
70151014		0.00486001	0.00519635	0.00532106	0.00531375	0.005143	0.00491743	0.00464439	0.00404317	0.00354158	0.00387482	0.00486887	0.00761826	0.00730085	0.00884822	0.0105258	0.010579	0.0144281	0.018183	0.0193708	0.0206841	0.0234845	0.0253169	0.0282973	0.0297174	0.0305651	0.0301329	0.0279807	0.0252137	0.023308	0.0230315
70153540		0.00473349	0.00547385	0.0050927	0.00602203	0.00696791	0.00769152	0.00684731	0.00644374	0.00649074	0.00659028	0.00769755	0.00883088	0.0101929	0.0141585	0.0181397	0.0206513	0.0212734	0.021064	0.0208613	0.0211702	0.0208524	0.0203933	0.0195056	0.01964	0.0207902	0.02381	0.0245336	0.0233488
70155075		0.00202702	0.00119972	0.000906062	0.0014427	0.00228302	0.00326175	0.00394408	0.00457347	0.00479107	0.00499294	0.00533086	0.00605623	0.0068316	0.00752965	0.00797639	0.0086459	0.00942298	0.0112048	0.013336	0.0146259	0.014997	0.0160888	0.0168145	0.0181194	0.0194099	0.0227718	0.0258575	0.0271164	0.0285322
70155829		0.00104372	0.000988031	0.00185378	0.00298036	0.0032339	0.00431023	0.00450578	0.00514273	0.0075606	0.0129874	0.0168338	0.019209	0.020798	0.0217206	0.0237191	0.0250908	0.0253308	0.0245628	0.0242569	0.0228551	0.0218922	0.0213681	0.0205205	0.0190889	0.0169417
70156136		0.00108488	0.00166889	0.00234182	0.00307764	0.00388592	0.00430057	0.00503959	0.00532077	0.00645632	0.00833944	0.00982552	0.0107708	0.0117117	0.012802	0.0151148	0.0176037	0.0203985	0.0225789	0.0233306	0.0229837	0.0233929	0.0247611	0.0253805	0.0256421	0.0241369
70156206		0.00231033	0.00248464	0.00320616	0.00436951	0.00564731	0.00690038	0.00664666	0.00588886	0.00559489	0.00652131	0.0087142	0.0116996	0.0147799	0.0172894	0.0181911	0.0186001	0.0175651	0.0171622	0.016496	0.0169952	0.017578	0.0192709	0.0203259	0.0206368	0.0203063
70156680		0.00180649	0.00187183	0.0028183	0.00282394	0.00248665	0.00263852	0.00286315	0.00425425	0.00453936	0.00589165	0.00703924	0.00817364	0.00963368	0.00964218	0.011355	0.013731	0.0145596	0.0158949	0.0177443	0.0211441	0.0243608	0.0265965	0.0267339	0.0261954	0.0254364	0.0235914	0.0216955	0.0187955
70157057		0.00300151	0.00293251	0.0032305	0.00374906	0.00429397	0.00546368	0.00686827	0.00827942	0.0102169	0.01213	0.013688	0.0164006	0.019878	0.0209994	0.022548	0.0229833	0.0237563	0.0238335	0.0218619	0.0192752	0.0189146
70157127		0.00451384	0.00335477	0.00263346	0.00223266	0.00128414	0.00124967	0.00296323	0.0022077	0.00186092	0.00195343	0.00236923	0.00284979	0.00336601	0.00440766	0.00574882	0.00756113	0.00951008	0.0104202	0.0126624	0.0151808	0.017208	0.0185116	0.0196242	0.0198077	0.020005	0.0204243	0.0196552	0.0206722	0.0206831	0.0213421
70157504		0.00166601	0.000800465	0.00182693	0.00263121	0.00340886	0.00409225	0.00563348	0.00735734	0.00718156	0.00924346	0.00879612	0.0107802	0.0121619	0.0129148	0.0137169	0.0152979	0.0181054	0.0203992	0.022318	0.0231411	0.0235472	0.0261659	0.0258385	0.0265733	0.0261376	0.0225234	0.0195024	0.0187077	0.0166898	0.0161721
70157671		0.00619916	0.00536929	0.00628082	0.00682881	0.00815134	0.00922075	0.0110803	0.0101933	0.0122094	0.0141992	0.0162971	0.0178026	0.0189192	0.0195667	0.0198733	0.0199427	0.0201819	0.0208277	0.021145	0.0215372	0.0212485	0.0195051	0.0167676	0.0155747	0.0149051	0.0138366
70157811		0.00103089	0.00147505	0.00250918	0.00308205	0.00603763	0.00836719	0.0107631	0.0117607	0.0122901	0.0123599	0.0123437	0.0144931	0.0159243	0.0192153	0.0222817	0.0234049	0.0231194	0.0233867	0.0239242	0.0238831	0.0220137	0.0223038	0.0213435	0.0190548	0.0178647
70158048		0.00615631	0.00697555	0.00778679	0.00896787	0.0101115	0.0131652	0.0153066	0.0180286	0.0192236	0.0195429	0.0213136	0.0243458	0.0264534	0.0254977	0.0239176	0.0208589	0.0172571	0.0179692	0.016843	0.0160429	0.0152894
70158355		0.00482063	0.00441981	0.00461318	0.00546296	0.00670202	0.0080019	0.00805199	0.00952392	0.0103757	0.0137476	0.0165818	0.0154799	0.0179717	0.0207734	0.0252066	0.02466	0.0261402	0.0291403	0.0317488	0.0349019	0.035537	0.0362333
70159416		0.00362457	0.00408718	0.00474196	0.00505791	0.00530548	0.00595674	0.00600585	0.00693122	0.00654416	0.00861761	0.009504	0.00946544	0.0122272	0.0132957	0.0154935	0.0169434	0.017336	0.0192423	0.0191755	0.019241	0.0202662	0.0217223	0.0225543	0.0250108	0.0254318	0.0275522	0.0265057	0.0225794	0.0201493
70159890		0.00243714	0.00240925	0.00307925	0.00445567	0.00437808	0.00572513	0.00700613	0.00815003	0.00899795	0.0095126	0.00996002	0.012086	0.0131203	0.0164192	0.0180141	0.0214531	0.022881	0.0213934	0.0237872	0.0237732	0.0239764	0.0206967	0.0204981	0.0206078	0.0200668	0.021562	0.0233825
70160197		0.00189346	0.00208486	0.00237907	0.00289823	0.00373781	0.00430135	0.00455653	0.00465632	0.00468266	0.00467277	0.00450202	0.00445224	0.0053152	0.00706225	0.00923517	0.0118784	0.0146907	0.0163428	0.0180846	0.018242	0.0181587	0.0194022	0.0205662	0.0228542	0.0247587	0.0247735	0.0242083	0.0234415	0.022532	0.0194366
70160267		0.00385362	0.00375524	0.00367796	0.0039945	0.00457725	0.00637614	0.00902759	0.0121967	0.01291	0.0188778	0.016492	0.0220673	0.0202458	0.0231311	0.024868	0.0258715	0.0258484	0.0254523	0.0255811	0.0259858	0.0265736	0.0263673	0.0248048	0.022913	0.020455	0.0189484	0.0168051
70161258		0.00443953	0.00460816	0.0046285	0.00426541	0.0045906	0.00645503	0.0078626	0.00941453	0.00876639	0.00930571	0.00932732	0.00933918	0.0111844	0.00917283	0.00771364	0.0094201	0.00952788	0.0108189	0.0134049	0.0161708	0.0183635	0.0194763	0.0199562	0.0199754	0.0195626	0.0193671
70161705		0.00290876	0.00283739	0.00261685	0.00257693	0.00263956	0.00281916	0.00248053	0.00171027	0.001665	0.00201906	0.0025867	0.00352677	0.00495563	0.00742082	0.0097665	0.0124107	0.0150776	0.0173149	0.0187943	0.0196996	0.0203731	0.0203462	0.0207404	0.0205263	0.0217051	0.0224898	0.0249018	0.0269764	0.0278312	0.0269112
70162249		0.00574585	0.00576712	0.00547045	0.00511693	0.00513731	0.00516736	0.00693366	0.00950069	0.00930233	0.0100319	0.0118286	0.0118303	0.0137609	0.0143684	0.0139807	0.0141836	0.0162531	0.0174495	0.0194489	0.0198028	0.0209224	0.0206425	0.0201978	0.0191121	0.0180305	0.0175464	0.0168612	0.0162312	0.0151673	0.0156612
70162556		0.00424667	0.00441899	0.00468263	0.00478485	0.00498477	0.00502032	0.00467052	0.00481895	0.00375972	0.00368651	0.00234333	0.00230113	0.00419057	0.00836959	0.00928144	0.0125406	0.0146431	0.0162951	0.0182412	0.0211628	0.0202986	0.0211806	0.0200956	0.0199936	0.0222329	0.0250295	0.0289488	0.0313581	0.0320744	0.0315966
70162933		0.00233348	0.00257909	0.00291877	0.00337376	0.00372706	0.00426352	0.00401649	0.00394898	0.00400667	0.00408037	0.0043568	0.00466093	0.00520468	0.0063246	0.00820659	0.0105392	0.0128874	0.0151615	0.0169532	0.0177991	0.0186718	0.0207318	0.0241904	0.0272269	0.0277658	0.0254698	0.0231202
70166213		0.0023433	0.00156163	0.000780124	0.00151067	0.00112905	0.00134211	0.00143197	0.00170358	0.00160929	0.00207081	0.00236439	0.00374613	0.0068939	0.0106652	0.0167698	0.0183461	0.0189508	0.0211661	0.0212247	0.0253063	0.0249444	0.0267983	0.0261868	0.0236223	0.0210452	0.0215094	0.0198144	0.0171864	0.01521
70166687		0.00324741	0.00425596	0.00757052	0.00811471	0.0112262	0.00971538	0.0100536	0.0106283	0.0127873	0.015798	0.020584	0.0238422	0.0242419	0.0239431	0.0217878	0.0200484	0.0186097	0.0192125	0.0199864	0.0197973	0.0189443	0.0183334	0.0176252	0.0181229	0.0186103
70167134		0.00194273	0.00127731	0.00150949	0.00266292	0.00311646	0.00312216	0.00269951	0.00222828	0.00321278	0.0030901	0.00566024	0.00892403	0.0121364	0.014394	0.0157583	0.016441	0.017142	0.0178172	0.0178006	0.0184096	0.019067	0.0197772	0.0204588	0.0212098	0.0219568	0.0217528	0.0207744	0.0202962	0.0191615	0.0171531
70167748		0.0029009	0.00257116	0.00245244	0.0021209	0.00177356	0.00153459	0.00127571	0.000923666	0.000722741	0.00130271	0.00247521	0.00282265	0.00384135	0.00323783	0.00361097	0.00571773	0.00825733	0.00760332	0.0105959	0.0129282	0.0141935	0.0165667	0.0198718	0.0241638	0.0273865	0.0273546	0.0288111	0.0285473	0.0281586	0.0265686
70169046		0.00234359	0.00240922	0.00279409	0.00302761	0.002905	0.00302587	0.0035896	0.00521047	0.00788396	0.0116375	0.015487	0.0189953	0.0210166	0.0220889	0.022848	0.0232476	0.0239702	0.0243694	0.0232942	0.0226249	0.021541	0.0213147	0.0200327	0.0184368	0.0161939	0.014104
70170344		0.00415712	0.00319764	0.00225383	0.00141901	0.000953376	0.000510185	0.000848539	0.00176576	0.00327655	0.00382203	0.0065445	0.00532942	0.00745536	0.00995271	0.00871162	0.0108449	0.0134758	0.0157333	0.01677	0.0167526	0.0167423	0.016957	0.0170682	0.017968	0.018588	0.0195455	0.0199839	0.0196041	0.0201201	0.01972
70170414		0.00408742	0.00384599	0.00363988	0.00360317	0.00387374	0.00413914	0.00371792	0.00462849	0.00639471	0.00598287	0.00770713	0.00900862	0.0113972	0.0119817	0.013718	0.0172693	0.02026	0.0224512	0.0233413	0.0253149	0.023973	0.0238029	0.0240826	0.0254895	0.0268809	0.0265925	0.0232465	0.0191146	0.0156502
70170651		0.00490341	0.00594644	0.0059867	0.00629727	0.00587879	0.00433212	0.00495551	0.0058119	0.00668494	0.00783451	0.0095376	0.013111	0.0151787	0.0172967	0.0186546	0.0196697	0.020944	0.0219857	0.0209608	0.021269	0.0205409	0.0207863	0.0201872	0.0185496	0.0177133	0.016601	0.0154966
70171028		0.00659244	0.00591259	0.00502824	0.00424344	0.00359325	0.00328075	0.00313113	0.00247437	0.001745	0.00227455	0.00287035	0.00323481	0.00337586	0.00376245	0.00451263	0.00571547	0.00803282	0.010188	0.0134943	0.0162703	0.0185152	0.0199726	0.0195372	0.0210726	0.0237836	0.0251537	0.0256868	0.0257258	0.0247099	0.0233581
70171405		0.00494056	0.00507362	0.00513581	0.00516719	0.00515053	0.0052125	0.00534984	0.0059704	0.00663638	0.00747258	0.00741055	0.00960979	0.00868561	0.00991997	0.0138057	0.0167373	0.0212991	0.017964	0.0219046	0.0187358	0.0205065	0.0223071	0.0250812	0.027158	0.0308777	0.0307606	0.0280594	0.0294091	0.0268035	0.0243087
70172870		0.0011368	0.000749493	0.000568241	0.001371	0.00212922	0.00304574	0.00362416	0.00417758	0.00486459	0.0058543	0.00801019	0.0111933	0.0142118	0.0130279	0.0139601	0.0142407	0.01618	0.0193336	0.020711	0.0218006	0.0220531	0.0220781	0.0226163	0.0225852	0.0226375	0.0216018	0.0218908	0.0217364	0.0214299
70173484		0.00263369	0.00224359	0.00242459	0.00373493	0.00436481	0.00440625	0.00433195	0.00464387	0.0057904	0.00577424	0.00505186	0.00538884	0.00567104	0.00758659	0.0100799	0.0111751	0.0133361	0.0127611	0.0141531	0.0175082	0.0217523	0.0251109	0.0266093	0.0304854	0.0296636	0.0292512	0.0289185	0.0270147
70173931		0.00370691	0.0059793	0.00653716	0.00896347	0.00900724	0.00927818	0.0107301	0.0125198	0.0154544	0.0198517	0.0201804	0.0202745	0.0239922	0.0269577	0.028332	0.0304162	0.0329218	0.0328682	0.0308576	0.0260193	0.0217009	0.0177526	0.0156565	0.0150653
70174238		0.00685594	0.00745907	0.00944421	0.0135559	0.0163735	0.0204258	0.0191529	0.023955	0.0261063	0.0253826	0.0260111	0.0242957	0.0237041	0.0230171	0.0227707	0.0222446	0.0210232	0.0200584	0.0188957	0.0171489	0.0161875	0.0139907
70174545		0.00183527	0.00177392	0.00210091	0.00262478	0.00370766	0.00538929	0.00811008	0.0112387	0.0143872	0.0174236	0.0200463	0.0222003	0.0206888	0.0183228	0.0166148	0.0178381	0.0184644	0.0210367	0.0228482	0.0222945	0.0212014	0.0205231	0.0200876
70174615		0.00445473	0.00437505	0.00480559	0.00586291	0.0065834	0.00745494	0.00870008	0.0106523	0.0122353	0.0128068	0.0128721	0.0149649	0.0163961	0.0189598	0.0192845	0.0194489	0.0206415	0.0217218	0.0236065	0.0248557	0.0249991	0.0239117	0.023425	0.0236323
70174852		0.0053388	0.0055514	0.00574167	0.00586461	0.00563762	0.0052441	0.00534376	0.0060312	0.00721739	0.00841833	0.0102594	0.0123919	0.0119299	0.0142005	0.0168164	0.015556	0.0170007	0.0180821	0.0190413	0.0191166	0.0195801	0.0195107	0.0186336	0.0208388	0.0187493	0.0203084	0.0213755	0.0231986	0.0247639	0.0249447
70174922		0.00526418	0.00498024	0.00576099	0.00708438	0.00867664	0.0106164	0.0124496	0.0146731	0.0150295	0.0149775	0.0164705	0.0161981	0.0159955	0.0170071	0.0173793	0.0199742	0.0220304	0.0257796	0.0280664	0.0287227	0.0287426	0.0282966	0.0266377	0.0223736
70175229		0.00488109	0.00520382	0.00487669	0.00459921	0.00401641	0.00339086	0.00320986	0.00293257	0.00227841	0.00177641	0.00235084	0.00310015	0.00412276	0.00493243	0.00650359	0.00806596	0.00955425	0.0111439	0.012906	0.0143161	0.0158942	0.0225936	0.0187744	0.0231176	0.0252322	0.0295948	0.033091	0.033235	0.0341888	0.0335374
70175466		0.00464864	0.00444422	0.00397414	0.00345066	0.00356427	0.00434621	0.00365114	0.00465294	0.00442541	0.00474777	0.00557063	0.00694247	0.00835381	0.0095353	0.0112726	0.0131269	0.0156124	0.0167313	0.017484	0.0186731	0.0179036	0.0191914	0.0205304	0.0220257	0.0217134	0.0204257	0.0189853	0.0177054	0.0168014	0.0161864
70175536		0.00243937	0.00227472	0.0023364	0.00341094	0.00457214	0.00575974	0.00688102	0.00788074	0.00907463	0.0107604	0.0127441	0.0145129	0.0138116	0.0153354	0.0179277	0.0187637	0.0190763	0.0181094	0.0182103	0.0173116	0.0176197	0.0169814	0.0166087	0.0167668	0.0173746	0.01752	0.0174724	0.0171014	0.016
70175606		0.00418048	0.00398953	0.0047694	0.00523247	0.00498136	0.00563696	0.00691728	0.0112454	0.0170879	0.0170695	0.0221067	0.0250112	0.0253286	0.0244019	0.022675	0.0250731	0.0257716	0.0270533	0.0269591	0.0262976	0.0242177	0.0233698	0.0218212	0.0195925	0.0186761	0.0178974
70176150		0.00846354	0.00944388	0.0102683	0.0104088	0.0120422	0.0140218	0.0160878	0.0174406	0.019103	0.0203798	0.0201559	0.0185331	0.0168774	0.0180981	0.0175092	0.0175331	0.0198125	0.0205737	0.0198734	0.021052	0.0198262	0.0177308	0.0165983	0.015635	0.0140779
70176764		0.00807724	0.00760562	0.00730921	0.00683132	0.00725285	0.00854817	0.0100627	0.0129381	0.0151741	0.017114	0.0173545	0.0200792	0.0194463	0.0218019	0.0233205	0.0235861	0.0208071	0.0175411	0.0161309	0.0158628	0.0155916	0.0150827
70177448		0.00396089	0.00576245	0.00734031	0.0102524	0.0138074	0.013143	0.016656	0.0184975	0.0188076	0.0214179	0.0210012	0.0213069	0.0247926	0.0254333	0.026855	0.0254502	0.0243978	0.0224158	0.0198545	0.0168127	0.0154045	0.0142136
70177518		0.00609932	0.00474154	0.00565504	0.00726027	0.00847994	0.00884839	0.00868531	0.00889217	0.0104148	0.0130121	0.0154442	0.0168625	0.0184255	0.0192713	0.0196437	0.0209304	0.0228833	0.0238546	0.0241385	0.0225407	0.0213324	0.0196147	0.019098	0.0190226	0.0190946	0.0184311	0.0172071	0.0151955	0.0133042	0.0117607
70177685		0.005224	0.00530222	0.00550305	0.00473447	0.00463549	0.00338856	0.00148639	0.00237399	0.00642351	0.00757422	0.0119484	0.016012	0.019783	0.0243181	0.028113	0.030615	0.0306932	0.030432	0.0280471	0.0250669	0.0241063	0.0239105	0.0228279	0.0224511	0.0189776
70177755		0.00272678	0.00260105	0.00218325	0.00202947	0.00229775	0.00297949	0.00195768	0.00303264	0.00489248	0.00733735	0.00675881	0.00929591	0.0127854	0.0141497	0.0153759	0.0162602	0.0200039	0.0234072	0.0252741	0.0261234	0.0256117	0.0249167	0.0242549	0.0213971	0.0171531	0.0163739	0.0157162	0.0153156	0.0142998	0.0139391
70177825		0.00249435	0.00297447	0.00390056	0.00462726	0.00474512	0.00506406	0.00530001	0.00544533	0.00576355	0.00628229	0.00631324	0.0057866	0.00639707	0.00885876	0.00810549	0.0115449	0.0140165	0.0171992	0.0198511	0.0213916	0.0209816	0.0228135	0.0241007	0.0256958	0.0282353	0.0303144	0.0310306
70178202		0.00190813	0.00267803	0.00360532	0.00359589	0.00416272	0.00459984	0.00518229	0.00613898	0.0066528	0.00703948	0.008618	0.0102624	0.0118272	0.0138064	0.016838	0.0194169	0.0208124	0.0238248	0.0253065	0.0254165	0.0250203	0.0248108	0.0236572	0.0243941	0.0231023	0.0233599	0.0242613	0.0236664	0.0234093
70179667		0.00115609	0.00177291	0.0019846	0.00237742	0.00327268	0.00482734	0.00524055	0.00635637	0.00775004	0.0101485	0.0123686	0.0141285	0.0150974	0.0155554	0.016178	0.0170337	0.0182592	0.0195928	0.0203051	0.0204964	0.0198024	0.0192134	0.0176156	0.0154585
70179737		0.00370847	0.00349575	0.00390399	0.00451018	0.0047881	0.00440538	0.00433965	0.00503633	0.00670224	0.00606766	0.00841549	0.00682349	0.00813757	0.00945421	0.0106547	0.0127701	0.015543	0.0157584	0.0182939	0.0207352	0.0225408	0.0246892	0.0250866	0.024303	0.0248245	0.0228669	0.0212365	0.0195178	0.015972	0.0142974
70179807		0.00218379	0.00220357	0.00307896	0.00424573	0.00483492	0.00491494	0.00546593	0.00749643	0.0112488	0.0153284	0.0182577	0.0220508	0.0239232	0.0248658	0.025409	0.0257721	0.0254971	0.0256428	0.0254732	0.0247223	0.0246474	0.023891	0.0233614	0.0221607	0.0202309	0.0190864	0.0178865
70179974		0.00305127	0.00311136	0.00244397	0.00230942	0.00270739	0.0027826	0.00304678	0.0023186	0.0026856	0.00225785	0.00268915	0.00331416	0.00442503	0.00459378	0.00567159	0.00644203	0.00917683	0.0115111	0.0151752	0.017502	0.0200209	0.022271	0.0252759	0.0260637	0.0265602	0.0271344	0.0278472	0.0278531	0.0282375
70180281		0.00287722	0.00289257	0.00286078	0.00281704	0.0027626	0.00288221	0.00295546	0.00275856	0.00207587	0.0010307	0.00336034	0.00695433	0.0109631	0.00991313	0.0132798	0.0159837	0.0189038	0.0237266	0.0269408	0.0291957	0.0294973	0.0274387	0.0248428	0.0200253	0.0189463	0.0155003	0.0145609
70181035		0.000840219	0.000575738	0.00283796	0.00457469	0.00543912	0.0056205	0.00569134	0.0059442	0.00645954	0.00682417	0.00705773	0.00760808	0.00870015	0.0099386	0.0107985	0.0122867	0.0132829	0.0145741	0.0147188	0.0178169	0.0202627	0.0223681	0.0251807	0.02676	0.0285348	0.0296319	0.0288443	0.0276916	0.0254641
70182026		0.000931141	0.00160788	0.00253357	0.00341463	0.00406791	0.00450122	0.00500597	0.0048966	0.00599485	0.00683029	0.00760074	0.00745412	0.00881304	0.0104954	0.0120645	0.0137543	0.015964	0.0189019	0.0205163	0.0213609	0.0222321	0.0231243	0.0237647	0.0239084	0.0237579	0.0229674	0.0217989	0.0214866	0.0187821
70182263		0.00253051	0.00264124	0.00285264	0.00335154	0.0035276	0.00355172	0.00463126	0.00679751	0.0097351	0.0131016	0.016305	0.018495	0.0198314	0.0200613	0.0197903	0.0193411	0.0190991	0.0201977	0.0216365	0.0225002	0.022638	0.0226152	0.0211873	0.020948
70182877		0.00492981	0.00435451	0.00352113	0.00469743	0.00538304	0.00685024	0.00782597	0.00812841	0.00805494	0.00740437	0.00734034	0.00709348	0.00682927	0.00734854	0.00813661	0.00957076	0.0121764	0.0137618	0.0171033	0.0203904	0.02093	0.0207964	0.0218773	0.0223688	0.0216689	0.0214765	0.021964	0.023504	0.0241943	0.0237786
70183017		0.00327777	0.003476	0.00370851	0.0034773	0.00396132	0.00433927	0.00478671	0.004113	0.00442043	0.00475134	0.0050963	0.00523536	0.00563234	0.00621816	0.00765023	0.0117603	0.015222	0.0186501	0.0217124	0.0271969	0.0264038	0.0235402	0.0209306	0.0196982	0.0189527	0.0186389	0.0178548	0.0173071	0.0168221	0.0167267
70183184		0.0036492	0.0038926	0.00403618	0.00402332	0.0036376	0.00400301	0.00395522	0.00470215	0.00546368	0.00623434	0.00729522	0.00935178	0.0132203	0.0193629	0.0222185	0.0255392	0.0301088	0.0308024	0.0323355	0.0300734	0.0268617	0.0245732	0.0206522	0.0160187
70184008		0.00334689	0.00372063	0.00326991	0.00391608	0.0038637	0.00429032	0.00413994	0.00389401	0.00375949	0.00383241	0.00395497	0.00382291	0.00440659	0.00499655	0.00744861	0.00831849	0.0106419	0.0112651	0.0143329	0.0161552	0.0182001	0.0189279	0.0203493	0.0200709	0.0191266	0.0185461	0.0184634	0.0180585	0.0188335	0.0177802
70184245		0.0043051	0.00426919	0.00435323	0.00453598	0.00464126	0.00519629	0.00614312	0.00758357	0.00945084	0.0111984	0.0127534	0.0141631	0.0138337	0.0156434	0.0166429	0.0157981	0.015092	0.0148611	0.0153562	0.015885	0.0156051	0.0155033	0.0152877	0.014654	0.0147247	0.0139254	0.0136806	0.0136217
70184622		0.00340508	0.00316674	0.00286054	0.0029881	0.00316973	0.0034843	0.00344982	0.00376661	0.00414213	0.00391632	0.00398781	0.00388083	0.00354277	0.00334931	0.00302681	0.00210199	0.000408699	0.00297199	0.00811904	0.00882693	0.0139265	0.0172906	0.0199505	0.0222146	0.0247041	0.0258025	0.0252467	0.0236732	0.0228338	0.0224309
70184789		0.00341882	0.00362809	0.00469026	0.00669703	0.00972444	0.0120488	0.0131105	0.0151242	0.0183788	0.0199998	0.0198709	0.0178743	0.0164585	0.0162589	0.0164908	0.0167881	0.016973	0.0172337	0.0176089	0.0178043	0.01836	0.0188537	0.0181035	0.0176514	0.0161178	0.0143845	0.0136961
70185236		0.00488414	0.00497371	0.00497613	0.00487998	0.00454907	0.00380581	0.00215672	0.00124285	0.000865504	0.00368072	0.00644036	0.00636811	0.00984636	0.0124718	0.0154707	0.0206656	0.0234454	0.0267663	0.0278731	0.0292093	0.0289634	0.0279466	0.0268835	0.0240433	0.0240916	0.022814	0.0256922
70185306		0.00552884	0.00489028	0.00468204	0.00516404	0.00531784	0.00659903	0.00755282	0.00793849	0.00751382	0.00570664	0.00485426	0.0038423	0.00307121	0.00545525	0.00634881	0.00760793	0.00869496	0.0110046	0.0115178	0.0123702	0.0133288	0.0140431	0.0145561	0.014562	0.0162185	0.0182257	0.0203588	0.0260349	0.0280267	0.0301241
70185473		0.00380903	0.00614697	0.00899903	0.00938565	0.0122615	0.0149659	0.0175235	0.0200588	0.0224636	0.0245973	0.0259055	0.0257825	0.0247244	0.0239908	0.0233411	0.0226178	0.0216823	0.0197562	0.0188744	0.016385	0.014216	0.0126542
70186087		0.00489789	0.00477275	0.00472523	0.00616837	0.00757288	0.00974169	0.0135455	0.0172669	0.0204793	0.0228686	0.0243689	0.025043	0.0251517	0.0251663	0.0250186	0.0252661	0.0265627	0.0265343	0.0262398	0.0253388	0.0241215	0.0219101	0.0192428	0.0182249	0.0164377	0.0143436
70186604		0.00302607	0.00349456	0.00418983	0.00483473	0.00530157	0.00545371	0.0052427	0.00500308	0.00375317	0.00379917	0.00496837	0.00677856	0.0093117	0.0127081	0.0167302	0.0196221	0.0206463	0.0228564	0.0254211	0.0280634	0.0303852	0.0318579	0.0313901	0.029544
70186911		0.0043851	0.00379811	0.00347339	0.002651	0.00205529	0.00176423	0.00165348	0.00168665	0.00184498	0.00133539	0.00316791	0.00556929	0.00918475	0.0127476	0.0153495	0.0177798	0.0187651	0.0196127	0.0235667	0.0274783	0.0290865	0.0273985	0.026632	0.0248418	0.0234834	0.0223666
70187692		0.00308635	0.00265408	0.00266064	0.00263819	0.00165851	0.00107515	0.00172515	0.00282913	0.00354379	0.00528989	0.00766766	0.00638306	0.00748751	0.00904244	0.0121197	0.0155533	0.0202333	0.0237324	0.0255528	0.0267701	0.0263445	0.0256041	0.0246791	0.0256629	0.0256812	0.0279803	0.0292027	0.0277212	0.0233551	0.0192883
70188139		0.00323487	0.00317542	0.00294795	0.00300215	0.00347291	0.00422842	0.00495091	0.0066741	0.00942137	0.00913388	0.0113263	0.0130104	0.0134423	0.014247	0.0151751	0.015597	0.0175456	0.0198148	0.0213243	0.0207197	0.0201559	0.0215971	0.0221021	0.0234142	0.023073
70188753		0.00193087	0.00294935	0.0039976	0.004461	0.00413551	0.00331204	0.00338051	0.00507609	0.00609775	0.00925496	0.0136417	0.018024	0.0212087	0.0230075	0.0235289	0.0231332	0.0208479	0.0220367	0.0229276	0.0238397	0.023826	0.0229183	0.0228011	0.0209932	0.0193006	0.0167916
70189507		0.00226871	0.00244329	0.00236547	0.00357535	0.00542762	0.0077267	0.0104774	0.0134517	0.0160677	0.0177043	0.0207282	0.0226629	0.025092	0.0276053	0.0285674	0.0289576	0.0283189	0.028202	0.0276276	0.0264884	0.0250997	0.0232998	0.0213607	0.0189115	0.016121	0.0137302
70189981		0.00609381	0.00729319	0.00880342	0.0112318	0.013126	0.0146295	0.0159053	0.0172936	0.0181409	0.0184425	0.0178933	0.01668	0.0171059	0.0171867	0.0172067	0.0184165	0.0206421	0.0207969	0.0205305	0.0195315	0.0188574	0.0191361	0.0182857	0.0174182	0.0159026	0.0140934
70190051		0.00165245	0.00162636	0.00169067	0.00177804	0.00179633	0.00207423	0.00229024	0.00360223	0.00552987	0.00784621	0.0103146	0.0125889	0.0149711	0.016714	0.0180255	0.018774	0.019173	0.0194901	0.0197474	0.0205832	0.0221343	0.0229407	0.0238527	0.0237041	0.0231998	0.0229044
70190595		0.00379146	0.00379845	0.00409855	0.00426162	0.00480071	0.00565638	0.00573985	0.00535086	0.00499021	0.00559181	0.0076167	0.0093941	0.0114104	0.0125236	0.0142021	0.0161612	0.0189822	0.0227535	0.0265687	0.025933	0.0279679	0.026179	0.0240222	0.0204655
70191042		0.00464638	0.00516189	0.0053042	0.00505652	0.00542553	0.00498823	0.00470854	0.00416392	0.00358945	0.00401277	0.00644473	0.00956435	0.0128369	0.0164237	0.0204464	0.0244665	0.0283269	0.0307757	0.0326622	0.0348078	0.0365609	0.0348885	0.0332833	0.0297852	0.0254785
70192340		0.00153015	0.0020153	0.00219852	0.00258053	0.00381146	0.00520795	0.00612251	0.00658426	0.00691005	0.00747496	0.00763361	0.00823876	0.00894435	0.0098529	0.0105437	0.0100614	0.0116094	0.0140576	0.0154642	0.0172813	0.0215588	0.0261658	0.0280557	0.028373	0.0277092	0.0257015	0.0254533
70192577		0.002999	0.002292	0.00191759	0.00166936	0.000982158	0.000327321	0.000543285	0.00276108	0.00214357	0.00448754	0.00696304	0.00892954	0.0100799	0.0106128	0.0114173	0.0132853	0.0129305	0.0148068	0.0157734	0.0182157	0.020017	0.0238476	0.0248898	0.0243289	0.0228918	0.0234563
70193024		0.00280495	0.00205799	0.00190933	0.00237383	0.00286188	0.00289316	0.00326255	0.00396891	0.00384881	0.00480351	0.00631758	0.00817714	0.0103298	0.0122055	0.0134992	0.0131456	0.0137134	0.012871	0.0121041	0.0133378	0.0153019	0.0179851	0.0211096	0.0256913	0.0280138	0.0286309	0.0258884	0.024664
70193261		0.00140507	0.00140103	0.00144688	0.00120582	0.00179306	0.00265076	0.00384126	0.00550562	0.00749137	0.00897034	0.0108103	0.0125689	0.0146432	0.0164594	0.0178279	0.0192217	0.0214444	0.021856	0.0222673	0.0218707	0.0204287	0.0187715	0.0181706	0.0181413	0.0181272	0.0167528
70194015		0.00351653	0.00430653	0.00473711	0.00476118	0.00452967	0.00502659	0.00564768	0.00620686	0.00659425	0.00693088	0.0080648	0.00915976	0.0110158	0.0131398	0.0146895	0.0157283	0.0162037	0.0180132	0.0186729	0.0208757	0.0225033	0.0238571	0.0242089	0.0229001	0.0211445	0.0188579	0.0178017	0.0175874	0.0176854
70194252		0.00182595	0.00182911	0.00242284	0.00303355	0.00338921	0.00365723	0.00383424	0.00415129	0.00403812	0.00465524	0.00615533	0.00834614	0.0115124	0.0148246	0.0175746	0.0194509	0.0223325	0.019862	0.0222044	0.0223895	0.0241161	0.0250296	0.0258448	0.0253261	0.0243819	0.0238665	0.0228941
70194322		0.00300971	0.00441817	0.00578872	0.00586175	0.00807079	0.0112688	0.0135643	0.0156807	0.0137587	0.0156702	0.0169841	0.0177548	0.0204562	0.0233526	0.0248189	0.0248764	0.0240641	0.0234151	0.0242206	0.0233551	0.0219829	0.0211989	0.0208763	0.0204275
70194629		0.00529615	0.00483704	0.00446952	0.00429088	0.00426354	0.0044032	0.00468901	0.00485709	0.00515683	0.00550155	0.00566638	0.00667515	0.00700376	0.00801254	0.00986347	0.0112944	0.0149876	0.0180218	0.0194196	0.0195289	0.0214352	0.021191	0.0234556	0.0258685	0.0270346	0.0281002	0.027501	0.0266882	0.0244316	0.0226132
70195480		0.00488606	0.0048579	0.00451287	0.00417967	0.00396996	0.00386378	0.00471338	0.00472533	0.00375706	0.0039563	0.00569044	0.00447279	0.00807871	0.0112895	0.0139776	0.0163254	0.0182084	0.0174897	0.018945	0.0212703	0.0207884	0.0217422	0.0218801	0.0226095	0.021634	0.0210845	0.0197104	0.0188461	0.0177938
70195550		0.00344902	0.0035667	0.00325691	0.00306351	0.00317658	0.00368334	0.00377901	0.00475403	0.00652569	0.00864683	0.0110736	0.0140299	0.0174247	0.0204666	0.0237478	0.0257656	0.0268078	0.0270851	0.0250272	0.0238171	0.0213405	0.0202481	0.0177078	0.0159618	0.0145897
70196611		0.00256207	0.00300151	0.00349168	0.00387135	0.004359	0.00496655	0.00569566	0.00633225	0.00616996	0.00751716	0.00812352	0.00941602	0.0109294	0.0114858	0.0128072	0.0142836	0.0157526	0.0173064	0.0190169	0.020281	0.0201772	0.0181183	0.0168015	0.0152224	0.0133081	0.0125279	0.0132156	0.0145507	0.017803	0.0201855
70196778		0.00508385	0.00337009	0.00208104	0.00295277	0.00253778	0.0037601	0.00487227	0.007307	0.00883064	0.0105451	0.0118901	0.0130877	0.0121604	0.01497	0.0186397	0.021589	0.0238925	0.0243482	0.0250631	0.0252884	0.0257681	0.0263877	0.0266621	0.026187	0.0260948	0.0257366	0.0228214
70196918		0.00439785	0.00365005	0.00326525	0.00326682	0.00352391	0.00414722	0.00542435	0.00707636	0.0086335	0.00968831	0.0104512	0.0122408	0.0140743	0.0162719	0.0181059	0.0190853	0.0217653	0.0244123	0.0272723	0.0300803	0.033514	0.0331112	0.0300677	0.0257325	0.020547	0.0168385	0.0149318	0.0132552
70197085		0.00264196	0.00298104	0.00411279	0.00554011	0.00655396	0.00737753	0.0085784	0.00963487	0.0110642	0.0134821	0.0152888	0.0155242	0.0158733	0.0174284	0.0182094	0.0189437	0.0204756	0.0206185	0.0199546	0.0195473	0.0196554	0.0201022	0.0204525	0.0224807	0.025751	0.0265377	0.0257314	0.0239667	0.0214485
70198076		0.00327329	0.00356363	0.0035639	0.00338777	0.00320006	0.00334627	0.0038767	0.00519126	0.00667112	0.00787134	0.0087101	0.0104897	0.0120945	0.0134847	0.0159766	0.0176588	0.0182888	0.0195648	0.0200582	0.0179167	0.0162227	0.0159443	0.0167622	0.0188028	0.0202303	0.0202005	0.019478
70198453		0.00341816	0.00423929	0.00425993	0.00455124	0.0047594	0.00472686	0.0058342	0.00724623	0.0109445	0.0139384	0.0164388	0.0192352	0.0216857	0.0230516	0.0228717	0.0246781	0.0243104	0.0289048	0.0335831	0.0348182	0.0325002	0.0273346	0.0233413	0.0209603
70198690		0.00420102	0.00516119	0.00606869	0.00649792	0.00632953	0.00621397	0.00575681	0.00520761	0.00523673	0.00473208	0.00497407	0.00471022	0.00607836	0.00872809	0.0123049	0.0165116	0.0180726	0.0195036	0.0217804	0.0230697	0.0271529	0.0275597	0.0300703	0.0302639	0.0298199
70198830		0.0096438	0.0120442	0.0158226	0.0196898	0.0223143	0.0234152	0.0239702	0.023894	0.0222111	0.0230258	0.0207701	0.0191162	0.0184166	0.0179033	0.0168886	0.0159227
70199067		0.0064361	0.00595535	0.00663452	0.00760115	0.00901786	0.0104044	0.0114801	0.0129977	0.016255	0.0194535	0.0229743	0.023438	0.022675	0.022221	0.0216149	0.0221852	0.0223207	0.0216057	0.0216551	0.0219454	0.0221981	0.0229937
70199681		0.00588975	0.00659888	0.00673344	0.00751401	0.00814202	0.0096458	0.0120831	0.0137635	0.0136944	0.0151293	0.0184652	0.0221456	0.0240219	0.0246336	0.0248222	0.0269465	0.0259349	0.0267235	0.0249511	0.0215833	0.0181772
70199821		0.00247274	0.00174687	0.00147752	0.00207118	0.0034773	0.00238993	0.00450213	0.00725842	0.00957705	0.0134801	0.016248	0.0148933	0.0180634	0.0226445	0.0265697	0.0302048	0.0305005	0.0298478	0.0292521	0.0283514	0.026545	0.0257975	0.0222303	0.0196871	0.0188345
70201356		0.00144987	0.00169343	0.00212029	0.00226728	0.00261458	0.00322069	0.00437947	0.00549556	0.00431719	0.00527398	0.00607128	0.00689006	0.00872136	0.011197	0.0117175	0.0133905	0.0146177	0.0163688	0.0199154	0.021745	0.0240859	0.0247628	0.0271571	0.0277569	0.0277854	0.0274271	0.0258798	0.0269608	0.0250645	0.0234119
70203408		0.00182677	0.00228531	0.00297294	0.00362765	0.00421839	0.00404776	0.00498082	0.006689	0.00939281	0.0122837	0.0150042	0.0174681	0.0197586	0.0214203	0.0209673	0.0239045	0.02699	0.0283926	0.0270675	0.0254965	0.0257978	0.0239276	0.0229096	0.0232065	0.0249809
70203575		0.00406033	0.00263788	0.001938	0.00208085	0.00280304	0.00372346	0.00411015	0.00394251	0.00409042	0.00442929	0.00502088	0.00596643	0.00769994	0.00957582	0.0115615	0.013882	0.0164616	0.0184988	0.0190991	0.0183675	0.017601	0.0173793	0.0187584	0.0214492	0.0238203	0.0243996	0.0239105	0.0233895	0.0218104	0.0196398
70205320		0.00840062	0.00786194	0.00728859	0.00675359	0.00671723	0.00572007	0.00690198	0.00532919	0.00554357	0.00792395	0.0089893	0.0124312	0.0161282	0.0195029	0.0179205	0.0194191	0.0208502	0.022145	0.0221172	0.0224689	0.0227109	0.0242776	0.0234117	0.0253333	0.0256949	0.0254489	0.0249991	0.0201896	0.0192599	0.0164648
70205557		0.00430731	0.00378515	0.00328523	0.00355224	0.00386167	0.00418711	0.00516882	0.00720038	0.00790493	0.00988524	0.0128694	0.0147016	0.014702	0.0159731	0.0169211	0.0184223	0.0219512	0.0233199	0.0240772	0.0276047	0.0298678	0.0313574	0.0307375	0.0304004	0.0301395	0.0298497	0.0277492
70206004		0.00384855	0.00391509	0.00428538	0.00434323	0.00473808	0.00541952	0.00456613	0.00592887	0.00766935	0.0091632	0.00784175	0.00810773	0.0102044	0.0118783	0.0157168	0.020474	0.0248463	0.0265711	0.0290956	0.0287507	0.0316635	0.0345838	0.0353282	0.0329314	0.0280238	0.0233369	0.020189
70206171		0.00254151	0.00290021	0.0034323	0.00403842	0.00479843	0.00572506	0.00685316	0.00761753	0.00804812	0.00825065	0.00863283	0.00826183	0.00954669	0.00891415	0.00979683	0.0117075	0.0133462	0.0142888	0.0153973	0.0159855	0.019984	0.023783	0.0262408	0.0276535	0.0278382	0.0291998	0.0308802	0.0304315	0.0285935	0.0262028
70206855		0.00483109	0.00387006	0.00342137	0.00336868	0.00277775	0.00179096	0.00144762	0.00168172	0.00218292	0.00228962	0.00298643	0.00485895	0.0056403	0.0067187	0.00776102	0.00912911	0.0116054	0.0131137	0.0157244	0.0181196	0.019843	0.0225218	0.0238633	0.0243788	0.0236031	0.0221461	0.0202216	0.0187965	0.0184486
70207539		0.00329574	0.00411235	0.00407092	0.00340364	0.00259141	0.002601	0.00268236	0.00367689	0.00213223	0.00366968	0.00361818	0.0063989	0.00951794	0.0126841	0.01563	0.0143118	0.016246	0.0173507	0.0178314	0.0191278	0.0194905	0.0209132	0.0222129	0.0233804	0.023967	0.023625	0.0231687	0.0231032	0.0228843
70208530		0.00100472	0.0014095	0.00109687	0.00160752	0.0022198	0.00297502	0.00380602	0.00471929	0.00573425	0.00681446	0.0079937	0.00933952	0.0112644	0.0133614	0.0159486	0.0176673	0.0180979	0.0216161	0.0226931	0.0222751	0.0217587	0.021507	0.0221788	0.0239814	0.0258344
70208697		0.00297767	0.00288322	0.00314534	0.00294172	0.00354563	0.00408356	0.00485415	0.00521985	0.00582344	0.00755886	0.0113753	0.0162376	0.0211572	0.0251366	0.0286796	0.0299491	0.0291699	0.0288413	0.0286592	0.0293103	0.0315961	0.0316309	0.030056	0.0267338	0.0222856
70208767		0.00303809	0.00278001	0.00256555	0.00238189	0.00179186	0.00128775	0.000941087	0.00112133	0.00178733	0.00265766	0.00362705	0.00452379	0.00521709	0.00566176	0.00625824	0.00572033	0.0070324	0.00970524	0.0131984	0.0169083	0.0198888	0.0215077	0.0230009	0.0230987	0.02281	0.022556	0.0231441	0.0247959	0.0269262	0.0281248
70209758		0.00925544	0.0110531	0.0129704	0.0107572	0.0125495	0.0176079	0.0209393	0.0236741	0.0240342	0.0219407	0.0226483	0.0231062	0.0249477	0.0249122	0.0253464	0.0246004	0.0238386	0.0227723	0.022738	0.0228674	0.0225406
70209828		0.00449544	0.00380802	0.00423885	0.00463781	0.00561927	0.00718982	0.00945723	0.0120572	0.0140919	0.014946	0.0148592	0.0147582	0.0155893	0.0182351	0.0217461	0.023659	0.0240559	0.0233002	0.0234617	0.0225848	0.0222853	0.0210134	0.0201041	0.0190823	0.017586	0.0156988	0.0134181
70209995		0.00386651	0.00358921	0.00358287	0.00355887	0.00358158	0.00373926	0.00392339	0.00365022	0.00344247	0.00367526	0.00430711	0.005865	0.00836051	0.0111353	0.0138086	0.0167732	0.0185192	0.0244673	0.026095	0.0243536	0.0234547	0.0232672	0.025177	0.0256343	0.0264629
70210679		0.00455892	0.00477802	0.00523371	0.00560442	0.00554772	0.00507253	0.00597469	0.00648439	0.00587546	0.00540612	0.00611971	0.00912867	0.00836151	0.011862	0.0150966	0.0176182	0.0202871	0.02255	0.0240753	0.0267085	0.0300415	0.0318509	0.0308879	0.0278923
70210986		0.00511896	0.00540608	0.005721	0.00560683	0.0053968	0.005111	0.00487734	0.00541718	0.00744536	0.00868005	0.0108534	0.0129648	0.0160564	0.0184528	0.0204921	0.0224248	0.0237488	0.0242932	0.0249255	0.0257787	0.0263701	0.0259202	0.0244148
70211056		0.00316005	0.00350323	0.00323765	0.00304712	0.00280127	0.00223467	0.00333601	0.00505693	0.00541224	0.00718586	0.0109427	0.0137875	0.016048	0.0189059	0.0179107	0.0193655	0.0206034	0.022672	0.0243069	0.0264268	0.0279556	0.0293003	0.0296609	0.0286311	0.0265209	0.0237113
70211670		0.00342776	0.0024947	0.00193699	0.00193852	0.00224673	0.00277177	0.00356728	0.00427613	0.00455978	0.0042577	0.00379854	0.00307196	0.00410269	0.00684279	0.0101358	0.0132328	0.0155484	0.0211664	0.022779	0.0235896	0.0241515	0.0251279	0.0266142	0.02742	0.0270669	0.0268126	0.0250247	0.0238892	0.0230047	0.0223297
70212047		0.00245058	0.0022567	0.00226743	0.00202708	0.002002	0.00282641	0.00308002	0.00420766	0.00564562	0.00730285	0.00855669	0.010649	0.0139579	0.0192256	0.0220219	0.0261317	0.0270969	0.026584	0.0258702	0.026554	0.0265969	0.0253214
70212424		0.00246055	0.00174284	0.00177475	0.00109716	0.000669333	0.00107431	0.00214344	0.00413668	0.00521183	0.0067028	0.00861554	0.00766024	0.0109147	0.0144232	0.0181568	0.0197509	0.0217816	0.0208464	0.0210471	0.0212328	0.0243346	0.0275215	0.0296335	0.0319234	0.0326333	0.0336249	0.0340414	0.0328333
70212591		0.00395395	0.00458632	0.00472954	0.00510769	0.00531712	0.00544482	0.00565321	0.00593701	0.0059794	0.00614937	0.00613382	0.00653625	0.00683325	0.00685697	0.00749714	0.00798291	0.00877943	0.00911754	0.0107362	0.0125446	0.0130114	0.0141723	0.0131939	0.0135588	0.0139459	0.0169523	0.0201498	0.0233402	0.0262466	0.0280172
70212968		0.00396633	0.00449803	0.00434561	0.00450277	0.00456342	0.00487303	0.00452038	0.00453498	0.00489124	0.00582821	0.00797316	0.00883015	0.0106286	0.0138732	0.0131377	0.0159895	0.0176715	0.0212353	0.0255585	0.0273285	0.027229	0.0248738	0.0251813	0.0240382	0.0223442	0.0214259	0.0219936	0.020001
70213275		0.00141985	0.00227041	0.0028431	0.00215795	0.00186409	0.00227799	0.00370578	0.00511974	0.00643474	0.00953852	0.0120074	0.0132813	0.0145601	0.0159185	0.0165949	0.0183794	0.019728	0.0220566	0.0244422	0.0259509	0.0254439	0.0239025	0.0234354	0.0207659	0.0191394
70213582		0.00363583	0.00379082	0.00400446	0.00409711	0.00400709	0.00379605	0.00354615	0.00402813	0.00503908	0.00529265	0.0060179	0.00617299	0.00986747	0.0123064	0.0155203	0.0163185	0.0166483	0.0191865	0.0172503	0.0214276	0.0199023	0.0218292	0.0213303	0.0215234	0.0208193	0.0226152	0.0206253	0.0193899	0.018337	0.0173632
70213652		0.00298079	0.00291714	0.00380291	0.00458779	0.00571035	0.00806634	0.0082899	0.00947735	0.0126326	0.0164655	0.0208398	0.0245769	0.0269821	0.0299654	0.0312375	0.030262	0.0299092	0.027319	0.0249566	0.0229738	0.0206763	0.0170906	0.0145436	0.0129132	0.0121666
70214196		0.00542614	0.00549621	0.00543468	0.00458895	0.00394661	0.00336013	0.00335101	0.00330037	0.0028016	0.00545801	0.00700489	0.011603	0.011567	0.0135096	0.0173409	0.0203539	0.0236611	0.0260823	0.025371	0.0269137	0.0294912	0.032218	0.0335471	0.0318942	0.0305557	0.0286593	0.0264764	0.0233991
70214336		0.00564385	0.00575929	0.00572354	0.00546692	0.00527038	0.00497834	0.00477561	0.00463418	0.0031905	0.00276036	0.00277685	0.00327186	0.0042225	0.00619463	0.0084347	0.0104228	0.0129876	0.0143256	0.0151459	0.0158779	0.0160518	0.0169935	0.0182287	0.0192459	0.0202865	0.0216185	0.0231757	0.0238199	0.0231048	0.0213491
70215494		0.004023	0.00421053	0.00470249	0.00473857	0.00565384	0.00450347	0.00601293	0.00716767	0.00832738	0.00877785	0.00956565	0.0115903	0.0145229	0.0179646	0.0185224	0.0215171	0.0235976	0.0243618	0.0271664	0.0278924	0.0282457	0.0278791	0.0260848	0.0229964	0.0214041	0.0178926	0.0152136	0.0126524	0.010532	0.00914451
70217002		0.00242627	0.00331276	0.00229408	0.0031539	0.00372795	0.00490129	0.00587688	0.00657554	0.00853955	0.0100729	0.010688	0.0125	0.0132929	0.0140176	0.0165318	0.0164022	0.0185929	0.019342	0.0216941	0.0238854	0.0263402	0.0277774	0.0270984	0.0245049	0.0213063	0.0215513	0.0210825	0.0204276
70217169		0.00284555	0.00320589	0.00393249	0.00459988	0.00490692	0.00510753	0.00439653	0.00327354	0.00213016	0.0028908	0.00608154	0.00849416	0.0134147	0.0165734	0.0205352	0.0227498	0.0239759	0.0265121	0.0276001	0.0279612	0.0265592	0.0251044	0.0234463	0.0225858	0.0215004
70217476		0.0032178	0.00289367	0.00214309	0.00115601	0.00137138	0.00264122	0.00291594	0.00478352	0.00750657	0.00909137	0.0110068	0.0109923	0.0140131	0.0174316	0.0201422	0.0219928	0.0231761	0.0248582	0.0264817	0.028451	0.0292263	0.0268873	0.0228833
70217546		0.00237164	0.00260715	0.00263348	0.00262306	0.0033233	0.00476461	0.00612296	0.00714515	0.00799245	0.0095062	0.0118956	0.0150243	0.0157193	0.0150735	0.0145955	0.0164253	0.0191384	0.0224592	0.0253676	0.0269141	0.0266229	0.024609	0.0214437	0.0198285	0.0193297	0.0180654	0.0164395
70218160		0.00547377	0.00512123	0.00366049	0.00510054	0.00472689	0.00864573	0.0174862	0.0122105	0.0199051	0.0289089	0.0274233	0.0286396	0.0271224	0.0263335	0.0274664	0.0321492	0.0325142	0.034155	0.0323391	0.0371332	0.0397267	0.0427435	0.046979	0.0442215	0.0417046	0.0367508	0.0371659	0.0361981	0.0321995	0.0275752
70218607		0.00326497	0.00327143	0.00318898	0.00317467	0.00371289	0.0050094	0.00675896	0.00878997	0.0111858	0.0138521	0.0171563	0.0206107	0.0228948	0.0239639	0.024423	0.0245327	0.0245836	0.0241971	0.023814	0.0236548	0.0241344	0.0238661	0.0238946	0.021442
70219835		0.00495177	0.00442446	0.00394394	0.0035808	0.00329194	0.00317684	0.00327439	0.00341103	0.00357444	0.00353366	0.00400945	0.00494401	0.0063501	0.00818412	0.0104416	0.0127044	0.0145164	0.0170543	0.0183991	0.0194562	0.0207568	0.0221031	0.0231533	0.0240317	0.0247926	0.0248064	0.0246055	0.023703	0.0226684
70219905		0.00131618	0.00146135	0.00192341	0.00185836	0.00216235	0.00263406	0.00231217	0.00298018	0.0030013	0.00268519	0.00238542	0.002205	0.00185681	0.00270235	0.0036352	0.00484779	0.00682508	0.0112688	0.0147192	0.0174983	0.0178429	0.0179903	0.0205558	0.0246267	0.0283359	0.0307545	0.0323434	0.0308951	0.030639	0.0273295
70220142		0.000617067	0.0013495	0.00152035	0.00220424	0.00280055	0.00316048	0.0033655	0.00336147	0.00345361	0.00362266	0.00347684	0.00402794	0.00472291	0.00594406	0.00747963	0.00923054	0.0113963	0.0178964	0.0211836	0.023513	0.0243919	0.0243457	0.0247707	0.0265271	0.0295962	0.0337952	0.0356599	0.0369663	0.0366199
70220379		0.00519017	0.00557537	0.00583418	0.00557673	0.00512858	0.00473683	0.00386821	0.00369461	0.00274377	0.00242501	0.0044663	0.0036663	0.00541917	0.00863886	0.011679	0.0136672	0.0129754	0.0167034	0.0164405	0.0222825	0.0194326	0.0220695	0.0240073	0.0251136	0.0261353	0.0280893	0.0305872	0.0326861	0.0350567	0.0353171
70220686		0.00127909	0.00150554	0.00191179	0.00256254	0.0029802	0.00403509	0.00500272	0.00622832	0.00787827	0.010172	0.0132939	0.0167003	0.0192826	0.020181	0.0197769	0.0186131	0.0178399	0.0177785	0.01798	0.0182324	0.0190106	0.019976	0.0201319	0.0184478	0.016535	0.0142575	0.0125362	0.0111209
70220826		0.00415958	0.00473557	0.00537829	0.00548347	0.00647953	0.00705541	0.00931322	0.0119631	0.0143163	0.0159201	0.0171774	0.0188745	0.0202883	0.0208103	0.0212595	0.0218602	0.022077	0.0217078	0.0210199	0.019464	0.0185721	0.0178962	0.0170625
70221203		0.00191872	0.00209571	0.00236827	0.00273836	0.0033204	0.00426082	0.00536339	0.00627424	0.00685808	0.00745816	0.00881557	0.0115828	0.0138681	0.0128127	0.0164807	0.0197037	0.022283	0.0247708	0.0261044	0.0258461	0.0251581	0.0248762	0.0248742	0.0233751	0.0218689
70221677		0.00359976	0.00345358	0.00340671	0.00328511	0.00340085	0.00375017	0.00458089	0.00584419	0.0053803	0.00771513	0.0106063	0.0124925	0.0160507	0.0174791	0.0181277	0.0174413	0.0177048	0.0191111	0.0233823	0.0270869	0.0289759	0.0285932	0.0291487	0.0279875
70221747		0.00367715	0.00284635	0.00183001	0.000981127	0.00100154	0.00239223	0.0039114	0.00475802	0.00765986	0.00990422	0.01199	0.0131005	0.0139106	0.0152541	0.0180189	0.0203728	0.0223607	0.0228108	0.0222871	0.0218217	0.021397	0.02114	0.0208511	0.0197309	0.0180272	0.0169059	0.0165018	0.0158666	0.0144857	0.0127091
70221817		0.00376114	0.0041981	0.00447135	0.00459119	0.00334122	0.00535618	0.00820272	0.0117182	0.0147184	0.0160366	0.0182893	0.0214515	0.0262937	0.0284997	0.028752	0.0288441	0.0283762	0.0287767	0.0295073	0.0286883	0.030859
70221984		0.00279085	0.00278356	0.00261608	0.00206608	0.0023983	0.00200054	0.00220951	0.00280394	0.0035206	0.00364683	0.00420153	0.007046	0.00919329	0.0123879	0.0145099	0.0176548	0.0193932	0.0231906	0.0254381	0.0307908	0.0374662	0.0399082	0.0386009	0.0330452	0.0326555	0.0293777
70222431		0.00387658	0.0026791	0.00204406	0.00211017	0.0025437	0.00327629	0.00364806	0.00405802	0.00444788	0.00491046	0.0057573	0.00697129	0.00598788	0.00688079	0.00781008	0.00869575	0.0097275	0.0109906	0.013362	0.0178665	0.0222055	0.0223532	0.0238016	0.027185	0.0256177	0.0265755	0.0252199	0.0250054	0.024711	0.0237442
70222501		0.00394824	0.0032639	0.00273356	0.00263546	0.00281649	0.00330631	0.00310675	0.00275059	0.00279611	0.00274368	0.00336299	0.00480829	0.00644701	0.00823325	0.0100733	0.0113963	0.0142493	0.0162645	0.0178244	0.0187345	0.0195772	0.0201951	0.021024	0.0215236	0.022095	0.0221812	0.0217797	0.0216806	0.0216633	0.0208968
70222668		0.000263743	0.000609892	0.00111983	0.001596	0.00228674	0.00375399	0.0051248	0.00762383	0.0106943	0.0142272	0.0158082	0.0184374	0.0209639	0.0202697	0.0202958	0.017346	0.0172987	0.0179386	0.0189579	0.0208436	0.0223956	0.0232282	0.0233833	0.0228503	0.0216622	0.0189899	0.015877	0.0138044
70223352		0.000759378	0.0010633	0.00112221	0.00253754	0.00390316	0.00586823	0.0082269	0.00692544	0.00885079	0.00863915	0.0108044	0.0129739	0.014938	0.0147152	0.0157839	0.0194876	0.0216482	0.02158	0.0230482	0.0250543	0.0286994	0.0309165	0.0314141	0.0274617	0.0250889	0.0218698	0.0196129	0.0189739
70223589		0.00526512	0.00394412	0.00261651	0.00188506	0.00153865	0.000791249	0.00132241	0.00212534	0.00333154	0.00508736	0.00674302	0.00811518	0.00944637	0.00970755	0.0112525	0.0129516	0.0143965	0.0147778	0.0163757	0.017357	0.0196722	0.0211829	0.0236797	0.0252139	0.0249589	0.0243159	0.0215625	0.0217477	0.0201269	0.0185605
70223659		0.00283241	0.00312795	0.0036827	0.00454682	0.00503067	0.00552703	0.00534655	0.00539787	0.00714116	0.00909013	0.0125373	0.0118506	0.0148085	0.0174237	0.0185816	0.0180228	0.0186472	0.0191247	0.0221178	0.0266319	0.0288151	0.0264024	0.0232448
70226702		0.0046482	0.0053246	0.0056962	0.00616505	0.0074276	0.00787373	0.00985581	0.0114073	0.0149062	0.0147608	0.0183299	0.0198607	0.0234101	0.0255366	0.0273015	0.02579	0.0275843	0.0270072	0.02897	0.0296841	0.0289867	0.0271394	0.0270137	0.0271854	0.0284326
70226869		0.0064422	0.00795583	0.00798405	0.0103295	0.0123564	0.0148155	0.0158918	0.01884	0.0202079	0.0235131	0.0256247	0.0273631	0.0316565	0.0323904	0.0295015	0.0259852	0.0245146	0.0246159	0.0240905
70226939		0.00539511	0.00551857	0.00559122	0.00534762	0.00480582	0.00409505	0.00365227	0.00329872	0.00321602	0.00338344	0.00320526	0.00432392	0.0057727	0.00769888	0.00920987	0.0107834	0.0130149	0.0138704	0.0179534	0.0215201	0.027979	0.030625	0.0316653	0.0302192	0.0277656	0.024899
70227176		0.00496035	0.00512702	0.00571031	0.00628141	0.00645741	0.00627829	0.0062271	0.00693197	0.00864757	0.0105935	0.0119873	0.0128482	0.0143497	0.0128463	0.0165623	0.0197146	0.0214212	0.0211256	0.0198881	0.0194367	0.0209867	0.0236622	0.0270603	0.0303773	0.0322487	0.0309101	0.0305472	0.0263824	0.0233688	0.020417
70227553		0.00484204	0.00539989	0.00618495	0.00737206	0.00814152	0.0081858	0.0102706	0.0126503	0.0134975	0.0175015	0.0220917	0.0261687	0.0234372	0.0274526	0.0275435	0.0290063	0.0290981	0.0299035	0.0323352	0.0336752	0.0322723	0.03013	0.0266323	0.0238137	0.0192354	0.0196211	0.0188777	0.0189279
70228474		0.00326219	0.00344608	0.00431449	0.00434494	0.0041445	0.0041497	0.00413853	0.004216	0.00437671	0.00369435	0.00368229	0.00507377	0.00745626	0.0101383	0.00984666	0.0126599	0.0154001	0.0181789	0.0205418	0.0221572	0.0227272	0.0225374	0.0223956	0.0227718	0.0232754	0.0242298	0.0247038	0.025135
70229158		0.00448013	0.0053042	0.00575094	0.00615906	0.00687407	0.0084051	0.0103798	0.0122138	0.0133771	0.0140469	0.0156778	0.0192734	0.0225724	0.0230769	0.0233191	0.0209148	0.0199169	0.0199216	0.0197397	0.0183459	0.0176108	0.0174256
70229605		0.0065182	0.00743855	0.00848011	0.0104601	0.0125752	0.0138164	0.0157074	0.0147968	0.0157103	0.016249	0.0172514	0.0194934	0.0199027	0.0210835	0.0215318	0.0232087	0.0237784	0.0221517	0.0206228	0.0207897	0.0222687	0.0225147	0.0202432	0.0177497	0.0159806
70229842		0.00236222	0.00207921	0.000992038	0.000714468	0.00150682	0.00228299	0.00283314	0.00290397	0.00254041	0.00231644	0.00246271	0.00276838	0.00324517	0.00375127	0.00417681	0.00410667	0.00496955	0.00510147	0.00620929	0.00790536	0.00964972	0.0125911	0.0158406	0.0181125	0.0196041	0.0192646	0.0193806	0.0202252	0.0209647	0.0229642
70230079		0.00430149	0.00591579	0.00798386	0.00892576	0.00906755	0.0132405	0.0113441	0.013308	0.0169898	0.0177446	0.0207684	0.022557	0.0240936	0.0250345	0.0253305	0.0256173	0.0242459	0.0232828	0.0215883	0.0202623	0.0196587	0.0183781	0.0183256	0.0169053	0.0146085	0.0127272
70230149		0.00266675	0.00222211	0.00219321	0.00178969	0.00162714	0.00183547	0.00220288	0.00206036	0.00239617	0.00202924	0.00240814	0.00376734	0.0060218	0.00609681	0.00967148	0.0133122	0.017602	0.0183457	0.0209989	0.0226297	0.0236446	0.0259806	0.0287008	0.0300944	0.0312772	0.0299168	0.027524	0.0259623	0.0223152	0.0210577
70230526		0.00592862	0.00596823	0.00597566	0.00630115	0.00686425	0.00715024	0.00683097	0.00607072	0.00638425	0.00751208	0.00862344	0.00926707	0.010637	0.0114952	0.0123192	0.0125904	0.0128286	0.0130342	0.0126551	0.0124029	0.0132137	0.0145695	0.0163929	0.0166291	0.0163414	0.0173806	0.0182449	0.0185035	0.0206715
70232675		0.0023003	0.00192794	0.00200805	0.00244922	0.00284315	0.00315116	0.0036818	0.0031783	0.00306079	0.00388888	0.00495239	0.00620223	0.00816239	0.00999306	0.0116356	0.0119478	0.0173272	0.0193713	0.0214628	0.0215235	0.0209886	0.0219182	0.0227939	0.0232285	0.0226483	0.0235087	0.0244391	0.0258521	0.0254345	0.0234028
70233052		0.00441823	0.00453527	0.00396715	0.00363993	0.00330573	0.00376469	0.00477989	0.00512137	0.00513246	0.00576084	0.00641541	0.00635003	0.00630355	0.00594872	0.00742441	0.00913777	0.0124235	0.0183754	0.0234759	0.0272609	0.0280829	0.0262472	0.0233175	0.0233518	0.0228392	0.0226375	0.0217439	0.0206117	0.0204119
70233122		0.00425773	0.00548232	0.00647134	0.00721119	0.00760201	0.007427	0.00748646	0.00745025	0.00790686	0.00952132	0.0121818	0.0150202	0.0197368	0.02101	0.0223338	0.0231728	0.0229018	0.0221897	0.0219216	0.0227743	0.02448	0.0260431	0.026976	0.0274541	0.0260388	0.0240093	0.0214871
70233359		0.00247818	0.00297474	0.00331568	0.00439561	0.00559523	0.00736835	0.00945395	0.012127	0.0152508	0.0186763	0.0218732	0.0238887	0.0255428	0.0273803	0.0290085	0.029849	0.0305841	0.0290848	0.0265466	0.0244578	0.0229867	0.0228473	0.0216948	0.0193355
70233596		0.00851106	0.00980625	0.0088092	0.00710949	0.00711283	0.00655803	0.00806422	0.0110374	0.0123861	0.0147504	0.0161144	0.0166416	0.017704	0.0221563	0.0251877	0.0267195	0.0243758	0.0241254	0.0247775	0.0240047	0.0228474	0.0216376
70233736		0.00521122	0.00447759	0.00252029	0.0020391	0.00407153	0.00787159	0.00654484	0.00981597	0.0131071	0.0156343	0.019001	0.0217978	0.0230013	0.0223106	0.0231645	0.0236026	0.0254999	0.0268552	0.027087	0.0256624	0.0235349	0.0207166
70234280		0.00339842	0.00331687	0.00336442	0.00373255	0.00426668	0.00473605	0.00474744	0.00470654	0.00408616	0.00543749	0.00802157	0.00683283	0.00997172	0.0112529	0.0143543	0.015946	0.0176235	0.0184058	0.0202285	0.0208759	0.0216119	0.0218132	0.0230001	0.0242331	0.0249832	0.02473	0.0242866	0.0237969
70234350		0.00457458	0.00496518	0.00625861	0.00658218	0.00806498	0.00956665	0.0106417	0.0118919	0.0136572	0.0150675	0.0160896	0.018416	0.0191618	0.0217822	0.0257065	0.0272031	0.027434	0.025024	0.0212734	0.0177876	0.0171094	0.0167952	0.0175141
70234894		0.00352956	0.00361068	0.00365489	0.00401398	0.00406745	0.00423255	0.00548816	0.00702971	0.00843911	0.00927525	0.0103834	0.0106872	0.0122184	0.0132272	0.0152391	0.0167258	0.0167269	0.0189027	0.0186362	0.0197504	0.0200201	0.0205998	0.0215714	0.0197278	0.0200114	0.0193897	0.0185708	0.0191502	0.0194956	0.0196634
70235104		0.00224546	0.0026365	0.00346968	0.00435599	0.0047683	0.00476053	0.00478612	0.00468775	0.00458212	0.0048112	0.00574197	0.00593729	0.00749965	0.00913982	0.00900033	0.0108749	0.0139854	0.0150424	0.0151596	0.0176103	0.0197737	0.021745	0.0264962	0.0292034	0.0291395	0.0295609	0.0281625	0.029387	0.0291811
70235271		0.00291622	0.00311168	0.00361231	0.00411109	0.00451811	0.00482511	0.00493807	0.00470403	0.00420057	0.00407454	0.0049933	0.00699367	0.00973998	0.0127442	0.0154977	0.0177071	0.0197577	0.0221557	0.0249246	0.0272137	0.0273155	0.0252998	0.0230447	0.0208852	0.0192064	0.0209065	0.0177494	0.019862	0.0191851
70236025		0.00165337	0.00219925	0.00268899	0.00294717	0.00304318	0.00309073	0.00330413	0.00389901	0.00446929	0.00531781	0.00772891	0.0108145	0.00929758	0.0135099	0.0177792	0.0215856	0.0236491	0.0237525	0.0222326	0.0225744	0.0233048	0.0233363	0.0237012	0.024945	0.0269873	0.0275942	0.0267724
70236639		0.00297273	0.00343567	0.00328117	0.00219142	0.00134529	0.00291796	0.00373156	0.00426416	0.00465434	0.00502433	0.00542183	0.00603962	0.00700506	0.00819298	0.0117213	0.0148954	0.0172968	0.0204199	0.0218584	0.0240712	0.025033	0.0242307	0.0238195	0.0221414	0.0228004	0.0240699	0.0269075
70237937		0.00335307	0.00422442	0.00458451	0.00457399	0.00454065	0.00450332	0.00424696	0.00413377	0.00419006	0.00489161	0.00585062	0.00677309	0.0079535	0.00997276	0.0125512	0.0150092	0.0175782	0.0208997	0.0253656	0.0285904	0.0290188	0.0269529	0.0243448	0.023169	0.0233901	0.0242589	0.0233467
70238244		0.0012144	0.00131239	0.00234125	0.0036998	0.00416318	0.0066552	0.00904631	0.00829845	0.0100026	0.0116531	0.0111965	0.0125034	0.0135589	0.0151578	0.0176422	0.0187584	0.0222094	0.0262932	0.0286064	0.0281892	0.0246655	0.0201646	0.0177522	0.0172281	0.0168787	0.0164655
70239542		0.00113774	0.00116209	0.00168486	0.00220676	0.00300465	0.00327162	0.00434315	0.00499742	0.00543305	0.00709478	0.00738528	0.0083015	0.00987812	0.0132309	0.0134173	0.015728	0.019655	0.021695	0.0257169	0.0272466	0.0262145	0.024154	0.0235216	0.0208445	0.0199105	0.0191705	0.0188241	0.0184498	0.0154615
70239612		0.00334576	0.0027167	0.00230655	0.00109842	0.000496836	0.000937598	0.00177104	0.00211651	0.0025712	0.0030424	0.00387509	0.00444069	0.00518544	0.00465692	0.00694463	0.0100311	0.0124993	0.0137645	0.0142183	0.0128703	0.0149142	0.0137353	0.0154588	0.0182534	0.02087	0.023021	0.0245829	0.0250798	0.0251041	0.0243064
70239919		0.00263601	0.00279186	0.00273309	0.00277279	0.00337693	0.00442049	0.00545224	0.00632898	0.00723018	0.00895524	0.0115644	0.013788	0.0168869	0.0203081	0.0243984	0.0240488	0.0229165	0.0225589	0.0241729	0.0269373	0.0272573	0.0268267	0.0249302	0.0219323	0.0207525	0.0207845	0.0212568
70240463		0.00414478	0.00366218	0.003035	0.00244513	0.00259996	0.0034295	0.00421596	0.00427981	0.00411366	0.00420082	0.00478735	0.00480368	0.00532135	0.00544679	0.00558913	0.00622039	0.00846556	0.0125913	0.0161334	0.0211322	0.0253841	0.0262788	0.0309935	0.0365782	0.038721	0.0366635	0.0352373	0.0345703	0.033358	0.0314611
70240770		0.00381581	0.00441305	0.00484302	0.00525924	0.00571343	0.00577031	0.00535178	0.00587007	0.00519604	0.00454559	0.00499456	0.00656114	0.0100439	0.0130637	0.0143215	0.0155208	0.0163073	0.0166065	0.0164806	0.0153489	0.0136765	0.0124735	0.0123202	0.0137208	0.0174197	0.019666	0.0206187	0.0210996	0.0208888	0.0198658
70240910		0.00380149	0.00308982	0.00211458	0.00105284	0.00101586	0.000810392	0.000959885	0.0023447	0.00485509	0.00822238	0.00966787	0.0123225	0.0145634	0.0176037	0.0172337	0.0179439	0.0209589	0.0234206	0.0257542	0.0261401	0.0255156	0.0260962	0.0261757	0.0273126	0.0278284	0.0269327	0.0248617	0.0224663	0.0203231
70241077		0.00733759	0.00911851	0.00796721	0.0104154	0.0136135	0.0171917	0.020169	0.0189133	0.0215052	0.0230157	0.0223307	0.0232235	0.023577	0.0258041	0.0270374	0.0279003	0.0276067	0.0258302	0.0239133
70241524		0.00263485	0.00152577	0.000451137	0.00200143	0.00145686	0.00147982	0.00201424	0.00299315	0.00416579	0.00829649	0.0134531	0.0189119	0.0171017	0.0214282	0.0241564	0.0246392	0.02431	0.0251674	0.0257325	0.0263152	0.0266129	0.0250678	0.0235403	0.0231265	0.0230671	0.0222825	0.0215494	0.0204042	0.0188278	0.0169866
70241761		0.00413703	0.00420305	0.00435637	0.00428143	0.00390225	0.00392569	0.00399521	0.00378715	0.00351045	0.00325253	0.00299652	0.00369367	0.00368359	0.00576057	0.00954155	0.00866976	0.011629	0.0154916	0.0186874	0.0218429	0.0252198	0.0251786	0.0262978	0.0277616	0.0273749	0.0273611	0.0281233	0.0294749	0.0307431	0.0316508
70242682		0.00366242	0.00424086	0.00462362	0.00477695	0.00638887	0.007094	0.0106837	0.0111065	0.0128668	0.0134448	0.0135089	0.014283	0.0181034	0.0178699	0.0200985	0.0215428	0.023654	0.0252708	0.025552	0.0258527	0.0250961	0.0238213	0.0213825	0.0192583	0.0179434	0.017358	0.0168141	0.016405	0.0159141
70242822		0.00379983	0.00348521	0.00449415	0.00515038	0.00565457	0.00593327	0.00605996	0.00705488	0.00894227	0.0117655	0.014094	0.0160663	0.0177487	0.0190286	0.019889	0.0238503	0.0253935	0.0259813	0.0269003	0.0253802	0.0229771	0.0217718	0.0209506	0.0205321	0.0197673
70242989		0.00522793	0.00478098	0.00376915	0.00354888	0.0036924	0.00280705	0.00279063	0.00323883	0.00436162	0.00421296	0.00557351	0.00780806	0.00876774	0.0122335	0.0160534	0.0181665	0.0223696	0.0241775	0.0230888	0.0210959	0.0209029	0.022648	0.0246769	0.0263753	0.0274394	0.0257896	0.0246872	0.0230608
70243059		0.003217	0.00311615	0.00254126	0.00207723	0.00141459	0.000918291	0.00106539	0.00160491	0.00217629	0.00266425	0.00307639	0.00342011	0.00374255	0.00399645	0.00398793	0.00345706	0.00275545	0.00185528	0.00254182	0.00179503	0.00373841	0.00663019	0.00895356	0.0120579	0.0151337	0.0191965	0.0207413	0.0210184	0.0211901	0.0204315
70244804		0.00374332	0.003478	0.00348757	0.00366845	0.00372974	0.00397195	0.00289268	0.00141621	0.00166296	0.00220312	0.00533103	0.00827955	0.00789333	0.0115672	0.0146863	0.0185972	0.0219915	0.0231623	0.0206279	0.0225397	0.0259933	0.0248839	0.025395	0.0247464	0.0247119	0.0246567	0.0222334	0.0190653	0.0178832	0.016982
70245041		0.00515519	0.00451503	0.00395007	0.00347661	0.00321643	0.00269778	0.00217636	0.00195477	0.0020508	0.00241731	0.00253624	0.00324602	0.00656136	0.00837981	0.0112861	0.0156707	0.0168662	0.0174336	0.0200946	0.0224954	0.0223087	0.0208225	0.0219481	0.0231127	0.0252771	0.0291832	0.0317887	0.0305225	0.0284794	0.0266247
70245111		0.00239353	0.00324112	0.00483115	0.00631294	0.00904515	0.00894047	0.0101306	0.0114162	0.0135933	0.0156125	0.0175446	0.0202785	0.0226143	0.0233688	0.0235352	0.0224256	0.0211725	0.0204461	0.02027	0.0198843	0.0194441	0.0169709	0.012564
70246032		0.0033121	0.00367575	0.00361114	0.0040359	0.00432512	0.00440625	0.00431422	0.0039157	0.00371996	0.00357237	0.00341292	0.00308921	0.00279998	0.00303264	0.00446662	0.00607973	0.00783447	0.0112394	0.0120348	0.0132168	0.0145709	0.0171599	0.0168746	0.0206332	0.0222218	0.0229242	0.0236709	0.0249904	0.025285	0.0242785
70247260		0.00438207	0.00332101	0.0026532	0.0039533	0.00547436	0.0097486	0.013054	0.0163523	0.017386	0.0192827	0.0218546	0.0234363	0.025093	0.0257959	0.0260421	0.0255571	0.0249388	0.0239061	0.0230062	0.0216993	0.0201727	0.0179928
70248628		0.00529538	0.00533323	0.00488942	0.00416249	0.00352799	0.0032361	0.0031433	0.00317076	0.00279915	0.00280894	0.00461197	0.00725571	0.0111886	0.0143682	0.0165919	0.0192607	0.0232174	0.0232392	0.0260855	0.0271351	0.0262108	0.0260371	0.0245367	0.0239363	0.0248701
70249479		0.00539343	0.00555316	0.0057003	0.00577268	0.00487056	0.00617598	0.00511145	0.00600384	0.00675693	0.00739656	0.00942013	0.00855269	0.0126368	0.0140719	0.0190168	0.0216514	0.0219995	0.0212327	0.0210377	0.0230607	0.0250428	0.028348	0.0302768	0.030432	0.0300124
70249549		0.00212456	0.00255408	0.00308091	0.00336284	0.00337822	0.00306126	0.00297683	0.00281479	0.00368908	0.00540673	0.00827116	0.0114433	0.0174671	0.0211465	0.0237641	0.0244273	0.0264199	0.0245928	0.022828	0.0221959	0.0210068	0.0187144	0.0163377	0.0149188	0.0138922	0.0143028
70249786		0.00147333	0.00104346	0.000787565	0.000904183	0.00130196	0.00182444	0.00249043	0.00321475	0.00402763	0.00518688	0.00675903	0.00860146	0.0104522	0.0127534	0.0147421	0.0155516	0.0176724	0.020217	0.0230753	0.0252423	0.0239215	0.0248294	0.0246168	0.0257618	0.0262405	0.0264386	0.0245796	0.0215025
70250303		0.00300901	0.00237725	0.00198236	0.00153048	0.00158031	0.00131908	0.00191866	0.00281593	0.00323583	0.00378747	0.00411678	0.00451025	0.00572311	0.00823002	0.0116892	0.015225	0.0183381	0.0211527	0.0224696	0.0233532	0.0247443	0.0254077	0.0258544	0.0252805	0.0257723	0.0259662	0.026337	0.0256987	0.0245352	0.0221972
70250917		0.00320857	0.00364554	0.00376643	0.00417887	0.004517	0.00455812	0.00584419	0.00894994	0.0105579	0.0122367	0.0164763	0.0198225	0.0187137	0.0209588	0.0211132	0.0204369	0.0185787	0.0170696	0.017072	0.0191037	0.0207618	0.0251782	0.023921	0.0196534	0.0170205	0.0165031
70251224		0.00293963	0.00281081	0.0030412	0.00365452	0.00458731	0.00400709	0.00454454	0.00540888	0.00599616	0.00957024	0.0150311	0.0197349	0.0228219	0.0244072	0.0268572	0.0271958	0.0261804	0.0260765	0.0245375	0.0225349	0.0209862	0.0199477	0.0191446	0.0189977	0.0188798
70251531		0.00997791	0.012321	0.0153284	0.0183518	0.0210723	0.0244554	0.0257045	0.0266425	0.0273356	0.0265996	0.0254267	0.0229927	0.0212689	0.0216803	0.0215826	0.0225868	0.0216606	0.019144	0.0150128	0.0126697
70251768		0.00268822	0.00357841	0.00418681	0.00460418	0.00505544	0.00575726	0.0059164	0.00639722	0.00668588	0.00780248	0.00669144	0.00794662	0.00985969	0.0127277	0.0162938	0.0191066	0.0203196	0.0222059	0.0214729	0.0209301	0.0213998	0.0224104	0.0236594	0.0256666	0.0273113	0.0285454	0.0288984	0.0273027	0.02354
70252075		0.00485073	0.00548929	0.00590888	0.00598251	0.00551642	0.00544247	0.00428777	0.00328992	0.00321911	0.00392595	0.00559459	0.00727758	0.00798572	0.0115863	0.0144403	0.0161497	0.0184131	0.0203851	0.0243861	0.0275635	0.0285742	0.0280386	0.0263658	0.0253165
70252215		0.00751639	0.00794869	0.00862708	0.00962642	0.0101322	0.0109649	0.0114019	0.0123468	0.0129023	0.0147576	0.0170104	0.0199554	0.0221056	0.0225978	0.0213791	0.0194437	0.0213103	0.0197966	0.0219383	0.0239985	0.0244859	0.024807	0.0252843	0.0252631	0.0258472	0.0244462	0.0239457
70252452		0.00246871	0.00273075	0.00304089	0.00369303	0.00421445	0.0059952	0.00745263	0.00945975	0.0118605	0.0143306	0.0193119	0.0218728	0.024626	0.0267138	0.0269297	0.0247624	0.0230667	0.0221182	0.0233505	0.0240701	0.0229365	0.0222242	0.0203725	0.0193475	0.018191	0.0167526	0.0147553	0.0133123
70252522		0.00213946	0.00208495	0.00213803	0.00275817	0.00370306	0.00472349	0.00588047	0.00789424	0.00932228	0.0105374	0.0120509	0.0143684	0.0166154	0.0197472	0.0200922	0.0227078	0.021709	0.021818	0.0230469	0.0231289	0.0238227	0.0241113	0.0238692	0.0229747	0.0228457
70253136		0.0033288	0.00397623	0.00459301	0.00500367	0.00531262	0.00601881	0.00755414	0.00975472	0.0125131	0.015072	0.0169384	0.0180364	0.0184452	0.0183793	0.0196477	0.0197992	0.0196373	0.0204405	0.0218159	0.0230752	0.0230407	0.0219168	0.0205766	0.0204312	0.0212712	0.0215996	0.0210406
70253443		0.0023664	0.00290948	0.00355471	0.00414276	0.00396914	0.00363474	0.00415147	0.00431911	0.00466281	0.00530246	0.00741119	0.00887241	0.0104811	0.0124305	0.0150582	0.0182592	0.0219348	0.0247533	0.0272307	0.0298219	0.0301988	0.0283547	0.025509	0.0231265	0.0211694	0.0206445	0.0186163	0.0149919	0.0113078	0.0127092
70253750		0.00492509	0.00456425	0.00415162	0.00396604	0.00366734	0.00363019	0.00495457	0.007874	0.0115648	0.0152843	0.0186797	0.0216132	0.0239789	0.0251505	0.0243884	0.0229705	0.0225227	0.0221955	0.0219145	0.022146	0.0220572	0.0221679	0.0222562	0.0218938
70253987		0.00609329	0.00577092	0.00547197	0.00468383	0.00334813	0.00270307	0.0033195	0.00261394	0.00314522	0.00597906	0.0114956	0.015876	0.0216942	0.0236725	0.0250316	0.0265074	0.0266723	0.0271866	0.0269842	0.026665	0.0265605	0.0248676	0.0208504	0.0180408	0.0184204
70254057		0.00306802	0.00276445	0.00238052	0.00269432	0.0033238	0.00387322	0.00370645	0.00368368	0.00402409	0.00504352	0.0082707	0.0114639	0.0145226	0.0217036	0.0161296	0.0255551	0.023995	0.0253825	0.0267665	0.0265488	0.0269101	0.0283251	0.0277528
70254127		0.00388614	0.00351589	0.00320628	0.00272583	0.00262356	0.00355409	0.00385876	0.00460444	0.00486079	0.0050158	0.00513521	0.00574671	0.00541908	0.00795236	0.0112684	0.0147949	0.0167313	0.0188514	0.0220588	0.0257601	0.028118	0.0298214	0.0309289	0.0305378	0.0297359	0.0267598	0.0226511	0.0210012	0.0184614
70254504		0.000410419	0.00104073	0.0017569	0.00200903	0.00207544	0.00213437	0.0021257	0.00274464	0.00383543	0.00423993	0.00484912	0.00536666	0.00693701	0.0080584	0.00987621	0.0107816	0.0100463	0.0113608	0.0125625	0.0127143	0.0148129	0.0172162	0.0179415	0.0179606	0.018608	0.0211315	0.0233253	0.0246396	0.025256	0.0250379
70254671		0.00517463	0.00506461	0.00438795	0.00418551	0.00484127	0.00666836	0.00943455	0.0122534	0.0150775	0.0183682	0.0219967	0.025324	0.0287605	0.0319665	0.0330979	0.0312411	0.0304738	0.027744	0.0246755	0.0214166	0.0189031	0.0175977	0.016469	0.0153657	0.0140142
70254741		0.0108086	0.0110153	0.0133812	0.0172516	0.0163418	0.0194383	0.0205512	0.0211852	0.0226355	0.0249909	0.0263453	0.0270317	0.027782	0.0288939	0.0290864	0.0281199	0.0261602	0.0237288	0.0225339
70255118		0.00326784	0.00351327	0.00390725	0.00415996	0.00374747	0.00376333	0.00458522	0.00520962	0.00687228	0.00853793	0.00815859	0.00906522	0.0111208	0.012119	0.0164311	0.0202444	0.0240088	0.0246451	0.0231807	0.021833	0.0222768	0.0227426	0.0224647	0.0215076	0.0212132	0.0192204	0.0176102	0.0154495
70255592		0.00397041	0.00388196	0.00392809	0.00353629	0.00299485	0.00277395	0.00507015	0.00488277	0.00832524	0.00960321	0.0107908	0.0122878	0.0159003	0.022522	0.0269003	0.0293916	0.0302517	0.0293642	0.0270706	0.0246291
70255969		0.00544007	0.00596705	0.00564869	0.00774029	0.0105405	0.0127628	0.0145242	0.0165181	0.0190897	0.0220123	0.0232887	0.0234676	0.0217106	0.0207048	0.0200394	0.0218134	0.0236619	0.0255611	0.0270462	0.0271747	0.0256697	0.0227099	0.019183
70256039		0.00278915	0.00270762	0.00324765	0.00281523	0.00318111	0.003628	0.00469713	0.00684285	0.00861811	0.0101718	0.0121388	0.0141863	0.0159601	0.0171444	0.0181173	0.0208319	0.024096	0.0274301	0.0294602	0.0294443	0.0286686	0.0271667
70258328		0.00328665	0.00278285	0.00318956	0.00352311	0.003612	0.00347666	0.00308639	0.00279728	0.00345551	0.00517417	0.00780265	0.0112466	0.0153801	0.0195579	0.0230277	0.0256357	0.0276571	0.0288576	0.0285161	0.0264331	0.0241509	0.0216435	0.0204527	0.0214466	0.0209522
70258565		0.00275485	0.00333581	0.00416748	0.00458414	0.00444011	0.00392199	0.00362085	0.00375062	0.00469987	0.00551612	0.00415282	0.00575207	0.00476035	0.0070791	0.0100707	0.0131855	0.0155363	0.0163746	0.0166822	0.0176269	0.0197409	0.0206474	0.0207895	0.0220943	0.0219532	0.023598	0.0242118	0.0231195	0.021361	0.019722
70259012		0.00224467	0.00313078	0.00377313	0.00410558	0.00432	0.00444817	0.00507163	0.00678973	0.00971864	0.00923639	0.0122204	0.0144068	0.0160139	0.0169967	0.0177998	0.019991	0.0226374	0.0239982	0.0241351	0.0247012	0.0254989	0.0255994	0.0245609	0.0233598
70259486		0.00412067	0.00347902	0.0026676	0.00229476	0.00245229	0.00290928	0.00421227	0.00426721	0.004709	0.0053901	0.00644047	0.00554692	0.00783645	0.00990718	0.0111085	0.0118116	0.0140247	0.0163302	0.0199051	0.0226179	0.0262852	0.0292221	0.0291989	0.0261626	0.0230465	0.0215009	0.0214806	0.0219618	0.0219406
70259556		0.00364961	0.00385935	0.00366794	0.00348933	0.00345206	0.00365776	0.0040225	0.00545253	0.00753756	0.00831849	0.010992	0.0137645	0.0165123	0.0185034	0.0207569	0.0206371	0.0237184	0.0250878	0.0256216	0.024895	0.0239509	0.0229776	0.0206149
70259626		0.00257347	0.00265165	0.00318548	0.00412883	0.00467591	0.00566606	0.00642596	0.00769771	0.00927283	0.0104592	0.0117355	0.0129463	0.014188	0.0149479	0.0148809	0.0162026	0.0158387	0.0177031	0.0194951	0.0204409	0.0204597	0.0194413	0.0186072
70259863		0.00393895	0.00507837	0.00569874	0.00631002	0.00707224	0.00741238	0.00793717	0.00818217	0.00938179	0.00993081	0.0106636	0.00960529	0.0115541	0.0141418	0.0170339	0.0209569	0.0245407	0.028495	0.0289054	0.0303306	0.0285876	0.0300702	0.0307552	0.031986
70260310		0.000869595	0.00196673	0.00524186	0.00637232	0.0105305	0.0155883	0.0189707	0.0230942	0.0257934	0.0263866	0.0281421	0.0278423	0.0261789	0.0251028	0.0231138	0.0195391	0.0177386	0.0173769	0.0169472	0.0160693
70260477		0.00298169	0.00343841	0.003471	0.00316384	0.00291124	0.00220044	0.00284215	0.00397066	0.00590058	0.00772169	0.00997542	0.0119513	0.013378	0.0153543	0.0185441	0.022012	0.0259505	0.0295406	0.0280247	0.0315165	0.0335951	0.0345749	0.0300945	0.0280269	0.0233239	0.0206815
70260547		0.00319948	0.00355082	0.004064	0.0045456	0.00488705	0.00515442	0.0054175	0.00606201	0.00627533	0.00626317	0.0057807	0.00486989	0.00369355	0.00264023	0.00278148	0.00476355	0.00695548	0.00986653	0.0127293	0.0156334	0.0181144	0.0207138	0.0230484	0.024388	0.0246314	0.0240656	0.0224552	0.0204536	0.0190317	0.0183789
70260617		0.00396076	0.00427856	0.00483755	0.00540955	0.00548562	0.00644719	0.00753793	0.00862454	0.0099937	0.0123087	0.015584	0.0188752	0.0202484	0.0224765	0.0237786	0.0244046	0.0244197	0.023112	0.0215493	0.0209128	0.0201205	0.0201822	0.0198367	0.0193092	0.0173455
70260784		0.00231954	0.00291585	0.00408941	0.00509513	0.00576973	0.00592283	0.00699129	0.00571216	0.00730619	0.00905212	0.0104997	0.0141379	0.0164656	0.0217556	0.0221875	0.0231101	0.0226584	0.0219578	0.0229784	0.0218534	0.022664	0.0219134	0.0202363	0.0179682	0.0159606
70261091		0.00301624	0.00273354	0.002477	0.00317147	0.00379043	0.00580145	0.00566346	0.00815026	0.00989389	0.0123868	0.0143364	0.0149595	0.0177855	0.0212166	0.0237498	0.0300473	0.0331191	0.0319732	0.0289304	0.0282391	0.026572	0.0260695	0.0265613	0.025887	0.024285
70261231		0.00452913	0.00706895	0.00784793	0.0102451	0.0113752	0.00997934	0.0131311	0.0137333	0.0140921	0.0164177	0.0190244	0.0232427	0.0259565	0.026644	0.0277332	0.0275305	0.0268137	0.0270567	0.0270834	0.0263238
70262222		0.00538326	0.0051755	0.00471268	0.00407023	0.00392567	0.00393195	0.0038467	0.00385451	0.00382792	0.00362001	0.00320592	0.00289532	0.00264344	0.00252331	0.00229671	0.00300561	0.0030856	0.00294031	0.00262961	0.00250623	0.00347108	0.0035931	0.00461747	0.00542096	0.00588066	0.00738612	0.00907724	0.0112234	0.0118916	0.0134196
70262389		0.00699266	0.00692484	0.00597635	0.00463846	0.00430288	0.00529825	0.0055173	0.00606208	0.00780741	0.00723213	0.00913058	0.0123997	0.0163512	0.0184694	0.0198228	0.0205544	0.0236194	0.027044	0.0297595	0.0300648	0.0314573	0.0297735	0.0269134	0.0250344
70262836		0.00481999	0.00450212	0.00387594	0.00397634	0.00446271	0.00595664	0.00875314	0.0120552	0.0148957	0.0169163	0.0184139	0.0196936	0.0209069	0.0214906	0.0232093	0.0241946	0.0243788	0.023689	0.0234976	0.0233274	0.0233625	0.022236	0.0214631	0.0189144	0.0175506	0.0166687
70262906		0.00156184	0.0023638	0.0039029	0.00226349	0.00515137	0.00158652	0.00456287	0.00648402	0.00853686	0.011274	0.013107	0.01135	0.0136136	0.0173013	0.02077	0.0228274	0.0235209	0.0234357	0.022834	0.0225808	0.0242152	0.0269318	0.0293364	0.0298972	0.0283068	0.0265005
70263073		0.00861829	0.00758304	0.0060211	0.00473323	0.00354698	0.00340525	0.00205066	0.00207585	0.0022883	0.0024876	0.00259404	0.00270164	0.00253148	0.00306293	0.00322536	0.00394418	0.00478896	0.00600604	0.00818122	0.0106464	0.0132826	0.0156905	0.0174209	0.0183738	0.0194662	0.0202087	0.0215629	0.0237088	0.0231122	0.0259304
70263687		0.00430314	0.00380033	0.00314736	0.00209822	0.00193961	0.00229419	0.00266366	0.00295827	0.00350565	0.00321071	0.00389638	0.00487067	0.00589121	0.00722309	0.0083147	0.00967056	0.0108969	0.0126381	0.0148045	0.016407	0.0166313	0.0176885	0.0176391	0.0188088	0.0203068	0.0217774	0.0238973	0.022968	0.0237528	0.0243905
70263757		0.0032732	0.00324537	0.00349946	0.00337539	0.00343158	0.00379454	0.0050696	0.00754908	0.010088	0.0116463	0.0114147	0.0139647	0.0166982	0.0188662	0.0207284	0.0224075	0.0237954	0.0259537	0.0272071	0.0276553	0.0272315	0.0265828	0.0280801	0.0284766	0.0288068	0.0261752	0.0246966
70264134		0.00199378	0.00116812	0.00178753	0.00212561	0.00227833	0.00233755	0.00238579	0.00244898	0.00254228	0.00296331	0.00283855	0.00264147	0.00306357	0.00328404	0.00582063	0.00893549	0.0112314	0.0111705	0.0133167	0.0146258	0.0154811	0.0162961	0.0178212	0.0200457	0.021815	0.0225156	0.0223655	0.0222148	0.0224432
70264204		0.00260093	0.00326667	0.00377952	0.00411973	0.0042848	0.00434999	0.00460229	0.00479152	0.00409712	0.00497068	0.00602971	0.00794608	0.00804669	0.0101569	0.0127732	0.0129484	0.0162489	0.0185487	0.0196055	0.0200065	0.0202823	0.0205397	0.0210927	0.0217099	0.0217011	0.0224306	0.0231974	0.0243662	0.0247938
70264985		0.00260093	0.00326667	0.00377952	0.00411973	0.0042848	0.00434999	0.00460229	0.00479152	0.00409712	0.00497068	0.00602971	0.00794608	0.00804669	0.0101569	0.0127732	0.0129484	0.0162489	0.0185487	0.0196055	0.0200065	0.0202823	0.0205397	0.0210927	0.0217099	0.0217011	0.0224306	0.0231974	0.0243662	0.0247938
70265669		0.00179373	0.00224008	0.00402701	0.00641922	0.00934064	0.0125625	0.0160694	0.0197153	0.0224134	0.0255233	0.0269763	0.0267596	0.0229581	0.023014	0.0213867	0.0202343	0.0205198	0.0207656	0.0199026	0.0187572	0.0175546	0.0165361	0.0155842	0.014403
70265739		0.00366452	0.00334516	0.0031002	0.0029728	0.00298633	0.00309564	0.00364116	0.00453304	0.00535675	0.00586147	0.00660332	0.0123746	0.0172519	0.0212928	0.0232032	0.0230686	0.0227654	0.0240902	0.0271832	0.0288726	0.0298728	0.0296286	0.0277941	0.0263311
70265809		0.00425535	0.00333151	0.00290141	0.0028496	0.0029218	0.00297495	0.00300101	0.00331669	0.00425827	0.00636452	0.0093615	0.0122172	0.0151784	0.0180273	0.0205686	0.0222577	0.0213509	0.0212287	0.020621	0.0218413	0.0223514	0.0231928	0.0232193	0.0249852	0.0257292
70265976		0.00352289	0.00367012	0.00330133	0.00311805	0.00269903	0.00216381	0.00170947	0.00249788	0.00263755	0.00376861	0.00493041	0.00497097	0.00603228	0.00750236	0.0101405	0.0121494	0.0155261	0.0178343	0.0181627	0.0190873	0.0189137	0.0188729	0.019154	0.0190156	0.0202805	0.0216403	0.022683	0.0238917	0.0241263	0.0243864
70266660		0.00324533	0.00311766	0.00333607	0.00361284	0.00397124	0.00406107	0.00468988	0.00565614	0.0064474	0.00678327	0.00750457	0.00740513	0.0100558	0.0133861	0.0176558	0.0210254	0.0233427	0.0251244	0.0256406	0.0250461	0.0254858	0.025505	0.0265787	0.0281104	0.029309	0.0279986	0.0257355	0.0237926	0.0229738
70267581		0.00354671	0.00368658	0.00422109	0.00488341	0.00545659	0.00642535	0.0069564	0.00833099	0.00950463	0.0121285	0.0141958	0.017376	0.0192376	0.0217143	0.0235457	0.024137	0.0237671	0.0221277	0.0206674	0.0195402	0.018071	0.0176477	0.0161067	0.0140626	0.0125489
70268028		0.00385437	0.00416036	0.00484377	0.00559559	0.00611866	0.00607006	0.00574516	0.00635304	0.0064106	0.00702544	0.00806595	0.0103058	0.0132479	0.0153237	0.0146906	0.0155755	0.0165256	0.0177086	0.0190244	0.0198271	0.0211864	0.0212126	0.0226572	0.0234034	0.0219459	0.0202393	0.0206393	0.0184638	0.0159181
70268405		0.00266708	0.00270859	0.00268756	0.00289162	0.00360075	0.00457357	0.0044079	0.00541073	0.0069497	0.00779068	0.00815727	0.01059	0.0127201	0.0142866	0.0159342	0.0183238	0.0220086	0.0255802	0.027476	0.0285308	0.0272646	0.0260882
70268572		0.00234743	0.00177138	0.00130595	0.00166382	0.00204489	0.00289932	0.0040572	0.0053783	0.00674677	0.0079441	0.00871869	0.00754627	0.00778311	0.00830967	0.00919354	0.0100786	0.0117382	0.0135876	0.0133399	0.0151815	0.0180561	0.021948	0.0235826	0.0233704	0.0219524	0.0208931	0.022426	0.0231776	0.0245366	0.0252953
70268712		0.00446766	0.00539199	0.00648409	0.00685127	0.00699788	0.00557317	0.00735117	0.00810881	0.00764721	0.00862208	0.0111932	0.0104014	0.0121308	0.0130151	0.015006	0.016899	0.0183626	0.0211121	0.0215205	0.0219881	0.0236393	0.0256258	0.0274668	0.0279275	0.0273712	0.0256464	0.0247436	0.024833
70269633		0.00300084	0.00350258	0.00408707	0.00504211	0.00517674	0.00602664	0.00717771	0.00664132	0.00859203	0.010506	0.010329	0.0123343	0.014214	0.0152713	0.0155789	0.0151208	0.0158919	0.0162679	0.0181209	0.0194609	0.0199741	0.0202761	0.0189304	0.0169522	0.0159931	0.0162506	0.0166822	0.0158779
70270010		0.0084716	0.0103536	0.0119676	0.014028	0.0141304	0.0163374	0.0159729	0.017225	0.017405	0.0188201	0.0197255	0.0191846	0.0197481	0.0203709	0.0218563	0.0228114	0.0237504	0.0239798	0.0220192	0.0197426	0.0179233	0.0163614	0.0150973
70270177		0.00190629	0.00233088	0.0025444	0.00277169	0.00302435	0.00302775	0.00330024	0.00399408	0.003958	0.00448008	0.00511225	0.00620618	0.00742063	0.00880626	0.0100174	0.00909281	0.00849551	0.00912157	0.0136567	0.0163412	0.0183626	0.0192075	0.0208492	0.0223932	0.0243299	0.0256439	0.0252454	0.0239169	0.0222767
70270317		0.00516261	0.00525894	0.00495826	0.00584523	0.00640118	0.00679817	0.0072166	0.00779779	0.00853622	0.00994906	0.0127342	0.0168027	0.0204027	0.0219785	0.0238559	0.0225347	0.0231967	0.0246098	0.0247758	0.0238295	0.0232115	0.0233941	0.0206661	0.0183179	0.0171943	0.0160155	0.0146439	0.013134	0.0104643
70271238		0.00253825	0.00332533	0.00387982	0.0045296	0.00465895	0.00424391	0.00387279	0.00437581	0.00454457	0.00585538	0.00737373	0.0091991	0.0111726	0.0113957	0.0137318	0.0171832	0.017914	0.0199134	0.0202791	0.0201372	0.0202914	0.0216231	0.0196725	0.0200425	0.0212282	0.0219676	0.0232866	0.0235336	0.0222938
70272466		0.0012833	0.00149944	0.00213999	0.00281615	0.00339052	0.00405543	0.00554842	0.00676084	0.00612382	0.00736901	0.00836324	0.0112863	0.0125945	0.0140898	0.016176	0.0171516	0.0199365	0.0210503	0.0230687	0.0236338	0.024598	0.0249168	0.0249142	0.0244075	0.0223829
70274378		0.00273511	0.00273239	0.0026142	0.00315474	0.00447461	0.00527346	0.00597616	0.0075256	0.00705614	0.00915872	0.0128192	0.018646	0.0232118	0.0250315	0.0209678	0.0229549	0.0231704	0.0235039	0.0269767	0.0272385	0.0249554	0.0263286	0.0260935	0.02545	0.0245899	0.0225507	0.0193551	0.0164333	0.0144368
70275132		0.00382274	0.00489971	0.00627976	0.00789432	0.0096824	0.0111961	0.0120658	0.0101889	0.0113212	0.012462	0.0138684	0.0150397	0.0168346	0.020014	0.0243624	0.0267112	0.0280118	0.0299637	0.0293814	0.0302758	0.0300441
70275369		0.00667212	0.00755851	0.00872892	0.00976596	0.0106643	0.0113645	0.0118806	0.0116106	0.0116057	0.0126932	0.0133018	0.0156016	0.0170449	0.0173091	0.0170699	0.0173139	0.016799	0.0166949	0.0167583	0.0180904	0.0196488	0.0195001	0.0179285	0.0170081	0.0160083	0.014717	0.0141035
70275439		0.0038955	0.00225454	0.00143425	0.00213811	0.00305741	0.00408195	0.00501641	0.00617488	0.00740699	0.00853602	0.00950595	0.0100073	0.0107912	0.0114727	0.012389	0.0138224	0.0151986	0.0162318	0.017316	0.0187121	0.0187045	0.0192927	0.0189922	0.0185111	0.0177343	0.0171138	0.0166946
70275509		0.00367676	0.00369884	0.00412467	0.00450011	0.00454563	0.00450345	0.00477675	0.0056631	0.00716786	0.0086953	0.0105552	0.0125966	0.0160198	0.0181859	0.0202892	0.0214432	0.0215362	0.021619	0.0225248	0.0239576	0.0267929	0.0279612	0.0274122	0.0250446
70275746		0.00533291	0.00481551	0.00510239	0.00526214	0.00561248	0.0057342	0.00602162	0.00575459	0.00612172	0.00776618	0.0102457	0.0147376	0.0148874	0.0199407	0.0255194	0.02843	0.0301366	0.028559	0.027531	0.0244865	0.0252951	0.0236554	0.0218076	0.0199885	0.0203034	0.0198017	0.0189764	0.0166959	0.0148988	0.0146117
70275816		0.00368077	0.00295123	0.00337391	0.00392003	0.0038038	0.00312402	0.00330993	0.00494071	0.00739517	0.0103459	0.0129572	0.0142436	0.0143045	0.0139298	0.0139739	0.0149647	0.0176202	0.0204443	0.0222048	0.0232457	0.0238498
70276053		0.00211551	0.00143179	0.00135771	0.00168929	0.00224403	0.00263046	0.0027952	0.00262894	0.00214381	0.00249175	0.00446861	0.00359202	0.00569802	0.00855747	0.0108499	0.0125669	0.0140516	0.0161028	0.015835	0.0184944	0.0218971	0.0253924	0.0262662	0.0240776	0.023485	0.0212986	0.0205481
70276597		0.00794966	0.00745637	0.0074087	0.00731982	0.0071556	0.00641492	0.00604205	0.00544791	0.00560468	0.00627893	0.00835796	0.00767757	0.00911044	0.00901099	0.0112707	0.0126418	0.0148014	0.0163062	0.0175141	0.018514	0.0192889	0.0200225	0.0198855	0.0183637	0.0167636	0.0153309	0.0140699	0.0132075	0.012495	0.0117217
70276974		0.00325346	0.00352744	0.00377088	0.0040148	0.00428927	0.00458453	0.00478725	0.00492742	0.00537942	0.00664664	0.00901586	0.0121848	0.0153823	0.0185085	0.0218871	0.0236289	0.0246883	0.0251297	0.0249955	0.0233868	0.0207964	0.0187988	0.0170282	0.0166422	0.0164149	0.0160706	0.0156123	0.0148665
70277728		0.00277915	0.00301841	0.00310703	0.00325666	0.00364665	0.00394758	0.00467295	0.00467027	0.00432316	0.00431371	0.00329555	0.00263975	0.00241594	0.0041175	0.00508298	0.00833803	0.012684	0.0166095	0.0201743	0.0190963	0.0219757	0.0248049	0.028084	0.0255144	0.0292504	0.0297034	0.0322801	0.0316466	0.0278892	0.0258961
70278105		0.00504099	0.00430479	0.00414957	0.00300493	0.00279406	0.0026046	0.00256183	0.00232297	0.00325916	0.00436382	0.00512588	0.0057675	0.0056669	0.00741789	0.00885099	0.0102352	0.0124894	0.0138271	0.0134381	0.0147079	0.0165145	0.0194764	0.0224042	0.0285021	0.0321112	0.0320516	0.0308786	0.0301586	0.0302814	0.0305256
70278649		0.00564787	0.00561481	0.00648324	0.00561974	0.00675073	0.00789249	0.00939005	0.00846341	0.0104679	0.0132231	0.016418	0.0187791	0.019601	0.0195708	0.0191147	0.0202742	0.0223273	0.0232302	0.0232968	0.0226411	0.0251603	0.0237965	0.0256478	0.024049	0.0238256	0.0208339	0.0191669	0.018336
70278956		0.00283306	0.00279055	0.00523784	0.00538261	0.00736946	0.00884424	0.0109147	0.0140163	0.017034	0.0220714	0.0240485	0.0231524	0.0252955	0.0275066	0.0296068	0.0296859	0.0270968	0.0249499	0.0240775	0.0224574	0.0213198	0.0201957	0.018807	0.0174467	0.0156571	0.0137944
70279193		0.00565978	0.00644735	0.0071866	0.00845528	0.00946057	0.0106334	0.0117132	0.0107018	0.0121891	0.0138369	0.0160851	0.01792	0.0196279	0.0206799	0.0213883	0.0219424	0.023782	0.024101	0.0250101	0.025703	0.0263997	0.0269411	0.0261038	0.0228789	0.0194098	0.0171049	0.0146771
70280184		0.00443765	0.00433346	0.00538622	0.00793287	0.010436	0.0127871	0.0174863	0.0172044	0.0201117	0.0198926	0.0235672	0.0206562	0.0230023	0.0238317	0.0281626	0.0278448	0.0271239	0.0255308	0.0243522	0.0233051	0.0217649	0.0216581	0.0197147	0.0190892	0.0180661	0.0186486	0.0172607
70281175		0.00664646	0.00627347	0.0062764	0.00585834	0.005052	0.00476692	0.00574413	0.00746494	0.0086601	0.00952792	0.012252	0.0144123	0.0173561	0.0200886	0.018315	0.0205256	0.0216395	0.0241065	0.0241562	0.0233895	0.0246619	0.0242965	0.0238085	0.0242621	0.0256416	0.0280478	0.0292772	0.0293465
70281552		0.00277821	0.00214039	0.00158381	0.000932498	0.00170395	0.00310611	0.0028405	0.00338941	0.00228521	0.00203643	0.00209028	0.00252764	0.00377963	0.00607538	0.00902894	0.0119276	0.0142989	0.0163883	0.0196955	0.0230627	0.0259054	0.0271417	0.0264316	0.0224891	0.0186747	0.0164115	0.0183495	0.0161258	0.0180341	0.0202696
70282096		0.00197309	0.00327462	0.00454206	0.00596067	0.00691684	0.00827027	0.00891757	0.00993073	0.0109429	0.0128093	0.0151528	0.0165024	0.0162187	0.0150951	0.0142278	0.0151594	0.0202792	0.0242429	0.0266211	0.0269497
70282166		0.00261317	0.00275076	0.00338032	0.00446299	0.00625971	0.00779088	0.00931604	0.00804872	0.0104772	0.0134419	0.014343	0.015361	0.0187332	0.0232569	0.027253	0.0311759	0.0309892	0.0286305	0.0255695	0.0240554	0.021689	0.0190621	0.0165277	0.0154748
70282543		0.00846427	0.00686706	0.00712196	0.00954053	0.00758493	0.00888959	0.00908052	0.0131823	0.0137077	0.015226	0.0178326	0.0187659	0.0186439	0.0183851	0.0186695	0.0186234	0.0183689	0.0190102	0.0198043	0.0225565	0.0243525	0.0259367	0.0263978	0.0258461	0.0244246	0.0219559	0.0193584
70282613		0.00569926	0.00598716	0.00486854	0.00530133	0.00482104	0.00428517	0.00441187	0.00417903	0.00378216	0.00377602	0.00411976	0.00478602	0.0049078	0.00672479	0.00945206	0.0115881	0.0128239	0.0133163	0.0187204	0.0254635	0.0298068	0.032408	0.033313	0.0333311	0.0312621	0.0270345
70283227		0.00239022	0.00217551	0.00269995	0.00307749	0.00334285	0.00341089	0.00324573	0.00343412	0.00418452	0.00572125	0.0054615	0.00812834	0.0112787	0.014444	0.0171807	0.0190853	0.0248775	0.0274984	0.0285454	0.0299416	0.0275508	0.0259514	0.0250775	0.0237136	0.0230933	0.0210064	0.0184661
70283534		0.00261139	0.00375659	0.00466639	0.00513432	0.00665631	0.00816368	0.00974921	0.0108299	0.011694	0.0122073	0.0131034	0.0155409	0.0189901	0.0202053	0.0191088	0.0205186	0.0206634	0.0218099	0.0238949	0.0251867	0.0255364	0.027612	0.0305047
70283911		0.00429099	0.00354443	0.0030994	0.00328357	0.00361223	0.00413761	0.00522639	0.00734326	0.0073306	0.00963311	0.0131847	0.0157208	0.0200476	0.0232949	0.0253694	0.0306761	0.0325191	0.0320907	0.0335762	0.0327541	0.0334175
70284078		0.00164746	0.00324502	0.00524348	0.00741147	0.00508933	0.0064487	0.00834062	0.00695469	0.00978806	0.0114976	0.0124527	0.0157734	0.0194019	0.0229604	0.0239495	0.0234815	0.0220994	0.0208142	0.0203254	0.020442	0.0212159	0.0208641	0.0197617
70284218		0.00223921	0.00203701	0.00208409	0.00235347	0.00314632	0.00369489	0.00382699	0.00345201	0.0031012	0.00286166	0.00265113	0.00234165	0.00199764	0.00230971	0.0033436	0.00486457	0.00667212	0.00865357	0.0142973	0.0167889	0.019084	0.0208103	0.0215404	0.0218419	0.0224194	0.0234836	0.0251674	0.0264234	0.0275427
70284762		0.00818995	0.010169	0.00991249	0.0110014	0.0117397	0.0113892	0.0118452	0.0130213	0.0146508	0.0167852	0.0175318	0.0176068	0.0166259	0.0156433	0.0147913	0.0146714	0.0146232	0.0145443	0.0141647	0.0131475	0.0121795	0.0104777
70284832		0.00466221	0.00353747	0.00212977	0.0023737	0.0019059	0.00222029	0.00305076	0.00399492	0.00525128	0.00758107	0.00838471	0.0115089	0.0149046	0.0180375	0.0203535	0.0223752	0.0247556	0.0263804	0.0274171	0.0292688	0.0288884	0.0247264	0.0215107	0.0189743	0.0181302	0.0175827
70285069		0.00289471	0.00342571	0.00504995	0.00533853	0.00505269	0.00468425	0.00443945	0.00386855	0.0045219	0.00575498	0.0085688	0.0121083	0.0158598	0.0180603	0.0227275	0.0275292	0.028958	0.0295459	0.0296917	0.0286217	0.0278828	0.0259591	0.0257156	0.0260967	0.0262591	0.0256555
70285516		0.00244832	0.00250126	0.00317987	0.00452012	0.0064073	0.00877583	0.0115594	0.0146396	0.0174266	0.0191087	0.0193448	0.0192294	0.01914	0.0195311	0.0211507	0.023118	0.0250372	0.0255789	0.0239438	0.0221614	0.0196272	0.019339	0.0177331
70286437		0.00453448	0.00461151	0.00458104	0.00464183	0.00532481	0.00597311	0.0056333	0.00495108	0.0060097	0.00799842	0.00829132	0.0096243	0.0108287	0.0122788	0.0143612	0.0165304	0.0193907	0.0214929	0.0223645	0.0221598	0.021819	0.0216291	0.0215891	0.0212727	0.0208157	0.0198145
70287288		0.00279424	0.00224052	0.00192082	0.00177951	0.00186072	0.00201778	0.00341999	0.00538927	0.00681483	0.0082	0.0095869	0.0112901	0.0132199	0.0147052	0.0141566	0.0178572	0.0208922	0.0206232	0.0201545	0.0232865	0.0212375	0.0225887	0.0232156	0.0258226	0.0282005	0.0293779	0.0286914	0.0258669
70289033		0.0030348	0.0047651	0.00685606	0.00752219	0.00909053	0.0118045	0.0120832	0.0138622	0.0137145	0.0150452	0.0157122	0.0155376	0.0159549	0.0161118	0.0158001	0.015549	0.015452	0.015229	0.0151474	0.0152755	0.0156399	0.0143973	0.0149908	0.0158254	0.0159867	0.0168888	0.017332	0.0172676	0.0167715
70291559		0.00126873	0.00129523	0.00195661	0.00250953	0.00200673	0.00197365	0.00217027	0.00246553	0.00320365	0.00462455	0.00638354	0.00811745	0.0101365	0.012382	0.0143849	0.0153876	0.0157073	0.0168681	0.0186521	0.0206264	0.022176	0.0231801	0.0242268	0.0253342	0.0255181	0.025879	0.0244491	0.0231081
70292550		0.0104742	0.0103435	0.010033	0.00968817	0.00801574	0.00563713	0.00321975	0.00201697	0.00179216	0.00222943	0.00296917	0.00372154	0.0044358	0.0042314	0.0047976	0.0050916	0.00567904	0.00686396	0.00923099	0.010754	0.0113953	0.0124923	0.0132672	0.011626	0.0121752	0.0125347	0.0118454	0.0123087	0.0126908	0.0142131
70292927		0.00170545	0.00229316	0.00285876	0.00361301	0.00385957	0.0041751	0.00441988	0.0045484	0.00458578	0.00477139	0.00502142	0.00568535	0.00542013	0.00595408	0.00706407	0.00886434	0.0114156	0.0143425	0.0166914	0.0178596	0.0180148	0.0179684	0.0189125	0.0208206	0.0233014	0.0252086	0.0271162	0.0276722	0.0264313	0.0246404
70293541		0.00632278	0.00560473	0.00484762	0.00435954	0.00414879	0.00404832	0.00399628	0.00361007	0.00401748	0.00374174	0.003907	0.00405409	0.00422637	0.00459741	0.0052283	0.00612844	0.00776625	0.0105326	0.0140923	0.017726	0.0209402	0.0237771	0.0261574	0.027754	0.0286292	0.0291969	0.0300876	0.0313841	0.0318981	0.032442
70293918		0.00156759	0.000794397	0.000696606	0.00143869	0.00250314	0.00318021	0.0044442	0.00552929	0.00629999	0.00701999	0.0080591	0.0095639	0.0115108	0.0141238	0.0166604	0.0182506	0.0215545	0.0241647	0.0253793	0.02533	0.0248878	0.0239562	0.0229304	0.0235873	0.0236913	0.0243708
70294085		0.0027543	0.00357112	0.00420246	0.00435854	0.00417386	0.00417489	0.0047304	0.00565657	0.00752372	0.00984219	0.0125165	0.015403	0.0178029	0.019662	0.0210431	0.0223017	0.0224606	0.0216007	0.0205321	0.0215022	0.0208413	0.0201327	0.0201505	0.0198908	0.0193409	0.0185174	0.0176323
70295076		0.00325377	0.00247879	0.00196523	0.00208026	0.00138768	0.00180509	0.0024563	0.00271952	0.00316011	0.0034829	0.00372665	0.00421341	0.00545634	0.00370371	0.00566498	0.00870946	0.0110319	0.0130558	0.0146328	0.0170266	0.0185193	0.0182187	0.0191346	0.021424	0.0214738	0.0223258	0.0195739	0.0174902	0.0166794	0.0168682
70296067		0.00425716	0.00502067	0.00514421	0.00370328	0.00277529	0.00453243	0.00706913	0.00947595	0.0117799	0.0138467	0.0158598	0.018182	0.019687	0.0217574	0.0222767	0.0224774	0.0219886	0.0221099	0.0210787	0.0200935	0.0199415	0.0189246	0.018993	0.0190477	0.0189158	0.0179444
70297742		0.00342401	0.00365092	0.00382204	0.00392462	0.00391633	0.00379558	0.0036862	0.00369105	0.00386314	0.00408655	0.00434997	0.00502942	0.00659269	0.00901276	0.0117975	0.0144169	0.0165943	0.0182184	0.0191558	0.0202341	0.0202693	0.0225111	0.0250322	0.024596	0.0245666
70297812		0.00585235	0.00584021	0.00679987	0.00681295	0.00663327	0.0055606	0.00404646	0.00417811	0.00694125	0.0100701	0.0137849	0.0157841	0.0165902	0.0176786	0.0216281	0.0221885	0.0248751	0.0259915	0.0290579	0.0289291	0.028121	0.0274122
70297979		0.00522051	0.00618813	0.00617514	0.00623446	0.00568965	0.00528967	0.00603162	0.00643947	0.00563901	0.00786345	0.0091358	0.010863	0.0134555	0.0161351	0.0187595	0.0210093	0.023221	0.0243847	0.0246252	0.0250131	0.0248698	0.024311	0.023989	0.0230494	0.0213236	0.0183224
70298663		0.00409733	0.00389837	0.00388493	0.00424338	0.00450108	0.00449397	0.00416814	0.00360702	0.00305835	0.00310803	0.00355216	0.00477413	0.00670795	0.00872958	0.0106481	0.0103043	0.0124314	0.012692	0.0150138	0.016366	0.0175273	0.0204113	0.0245891	0.0293853	0.0315195	0.0318579	0.0329123	0.0330201	0.0314607
70299654		0.0040335	0.0024706	0.00206119	0.00196714	0.0021392	0.00218656	0.00205809	0.00220387	0.00229094	0.00259292	0.0035969	0.00525442	0.00766033	0.0109256	0.0147774	0.0189864	0.0231321	0.0266071	0.0278776	0.027263	0.0252024	0.0229535	0.0207437	0.0191333	0.0196895	0.0207978	0.0211884
70300338		0.0036853	0.00474697	0.0055786	0.00474112	0.00570969	0.00606937	0.00600046	0.00643655	0.00696417	0.00765701	0.00860337	0.0113828	0.0128367	0.0139883	0.0170413	0.0178963	0.0190688	0.0204243	0.0216113	0.0210815	0.022102	0.0241427	0.0274069	0.0270889	0.0268554	0.026207	0.025878	0.0251199
70300408		0.00393011	0.00423517	0.00451697	0.00472639	0.00517112	0.00551358	0.00561183	0.00552117	0.00530871	0.00590417	0.00588721	0.00625018	0.00686308	0.00735969	0.00874407	0.0103152	0.0115816	0.0115571	0.0122882	0.0128863	0.0132045	0.0138668	0.0156418	0.0179152	0.0202362	0.0224362	0.0225321	0.021972	0.0204018	0.0192121
70301189		0.000789693	0.000319415	0.000601781	0.0010334	0.00181847	0.00253456	0.00322848	0.00392277	0.0037686	0.00407955	0.00426364	0.00462643	0.00513818	0.00688734	0.00979191	0.0118951	0.0127655	0.0130813	0.0143553	0.0158185	0.0167961	0.017809	0.0185907	0.018681	0.0183228	0.0180695	0.0185397	0.0190881	0.0204132
70301496		0.005253	0.0054465	0.00517174	0.00493215	0.00403005	0.0045012	0.00620912	0.00870258	0.0112029	0.0145309	0.0163012	0.018277	0.0199606	0.0211577	0.0214291	0.0207734	0.0195626	0.019057	0.018461	0.0184294	0.0190707	0.019997	0.0202352	0.0201692	0.0202173
70301706		0.00329403	0.00261087	0.00222389	0.00251442	0.00181096	0.00248811	0.0033546	0.00456626	0.00565877	0.00762288	0.00946241	0.00713914	0.00907077	0.0112316	0.0121161	0.0150084	0.0168602	0.0166092	0.0190522	0.0195224	0.020373	0.0205084	0.0211557	0.0207646	0.0214589	0.0218169	0.022016	0.021536	0.0194869	0.0200246
70301943		0.00262893	0.00426346	0.00546305	0.00667725	0.00766688	0.00847671	0.00973346	0.0114669	0.0130496	0.0147044	0.0171401	0.0208197	0.0224126	0.0234802	0.0252119	0.0263197	0.026519	0.0269328	0.0258234	0.0238708	0.0216458	0.0206465	0.0215544	0.0253435	0.029252	0.0296601
70302557		0.00300808	0.00198925	0.00112477	0.00130276	0.000977469	0.000895727	0.00171495	0.00245769	0.00313566	0.0039854	0.0052258	0.00669873	0.0100165	0.010041	0.0130052	0.014471	0.0146055	0.0158187	0.0164397	0.0175925	0.0193529	0.0202489	0.0202291	0.019432	0.0186028	0.0180983	0.0186462	0.0199863	0.0207484	0.0218673
70302864		0.242636	0.264142	0.288621	0.307996	0.324042	0.321019	0.31637	0.302778	0.299145	0.290428	0.298653	0.300416	0.292501	0.270551	0.251923	0.250334	0.231498	0.20007	0.147644	0.0967049	0.130072	0.202415	0.264929	0.228031	0.20053	0.142486	0.110769
70303311		0.00380523	0.0041693	0.00478722	0.00442981	0.00465251	0.00470675	0.0048287	0.00495537	0.00450965	0.00447482	0.0051796	0.00644015	0.00799543	0.00975028	0.0119044	0.014459	0.0166994	0.0176757	0.0174322	0.0177397	0.0188312	0.0200587	0.0215486	0.0224623	0.0226352	0.0234529	0.0245182
70303618		0.00256553	0.00259117	0.00283603	0.0037309	0.00291534	0.00428928	0.00671668	0.00933368	0.0114877	0.0131268	0.0148233	0.0167557	0.016839	0.0194609	0.0233087	0.0267544	0.0290297	0.0296573	0.0293574	0.0289456	0.0286247	0.0279907	0.0259312	0.0232453	0.0200737
70304162		0.00571409	0.00659034	0.00646584	0.00625427	0.00623444	0.00671299	0.00725948	0.00742418	0.00692585	0.00570894	0.00482413	0.00536848	0.00713301	0.00973931	0.0121004	0.0138094	0.0146454	0.0153518	0.0168961	0.0201201	0.018703	0.0178449	0.0187828	0.0214314	0.0233136	0.0257978	0.026981	0.0263848	0.0251262	0.0232147
70305153		0.00727648	0.00685882	0.00626737	0.00604711	0.00512189	0.00447561	0.00361885	0.00254726	0.0019016	0.00199054	0.00186956	0.00224621	0.00246918	0.00250499	0.00257718	0.00297385	0.00403066	0.00503082	0.00450882	0.00403173	0.00318592	0.00352197	0.00598034	0.00936124	0.0119949	0.0147598	0.0174847	0.0194105	0.0205798	0.0217825
70305390		0.00325504	0.00306085	0.00310512	0.00392126	0.0051135	0.00571732	0.00566281	0.00596273	0.00618889	0.00624326	0.00653643	0.00774252	0.00922593	0.0108639	0.0137285	0.0170116	0.0203902	0.0234394	0.0262922	0.0276829	0.027401	0.02602	0.0250963	0.0240705	0.023767	0.0223273	0.0217356	0.0205807
70305460		0.00449083	0.00406197	0.00449733	0.00487083	0.00401498	0.00264991	0.00215125	0.00195234	0.00275042	0.00506711	0.00792897	0.00954117	0.011464	0.013448	0.016341	0.0158379	0.0176861	0.0198592	0.0194811	0.0214018	0.022512	0.0234104	0.0248847	0.0242676	0.02401	0.0229369	0.0212239	0.0193872
70307205		0.00273378	0.00373404	0.00402647	0.00431653	0.00408187	0.00360223	0.00350866	0.00412485	0.00637454	0.00660518	0.00969733	0.00941935	0.012808	0.0161347	0.0194678	0.0217076	0.026032	0.0273354	0.0279744	0.0272522	0.0275979	0.025151	0.0242584	0.0227545	0.021241	0.0194356
70307442		0.00457749	0.00446601	0.00452492	0.00424846	0.0028403	0.00205034	0.0015657	0.00276742	0.00390747	0.00495658	0.00679482	0.00840155	0.0141855	0.0159597	0.0184824	0.0174673	0.0174093	0.01716	0.0181861	0.018121	0.0189341	0.019295	0.0197462	0.0202314	0.0197143	0.0197751	0.0184882	0.0163266	0.0149044	0.01438
70307512		0.00487797	0.00480118	0.00422113	0.00400268	0.0040684	0.00410235	0.00384518	0.00329172	0.00276354	0.00252633	0.00263353	0.00323382	0.0041788	0.00563065	0.00787567	0.0107141	0.0135723	0.0160337	0.0179703	0.0195885	0.0209816	0.0222717	0.0242011	0.0269299	0.0289907	0.0289102	0.0280074	0.0244796
70307679		0.00103652	0.000829774	0.0011516	0.00126899	0.00102704	0.000946715	0.00186457	0.00274703	0.00326649	0.00344133	0.00330256	0.00291607	0.00286307	0.00400278	0.0061013	0.0087256	0.0118305	0.0149991	0.017845	0.0203343	0.0216692	0.0219773	0.0209945	0.0200077	0.0207213	0.0186918	0.0174796	0.017532	0.0177653	0.017866
70308126		0.00383178	0.00382459	0.00360663	0.00328588	0.00315898	0.00336066	0.00344331	0.0038619	0.00431941	0.00532423	0.00730044	0.0100004	0.012885	0.015921	0.0181776	0.0206134	0.0232541	0.0257812	0.026128	0.0238248	0.022237	0.0220806	0.0222095
70308363		0.00672842	0.00668491	0.00698827	0.00667874	0.00651773	0.00668698	0.00560039	0.00568495	0.00738903	0.00787654	0.00839012	0.0102288	0.0176532	0.0172091	0.0157555	0.015425	0.0224056	0.0296062	0.0304156	0.0316516	0.0288463	0.026897	0.0273946
70308433		0.0015926	0.00189282	0.00241742	0.00265956	0.00281201	0.00286756	0.00299881	0.00327985	0.00319319	0.00355525	0.00397076	0.00372534	0.00472738	0.00739499	0.0122958	0.0160461	0.0190428	0.0211998	0.0213833	0.0239415	0.0243399	0.0255833	0.0275551	0.0275909	0.0281339	0.0281405
70308503		0.00154767	0.00168834	0.00208474	0.00276334	0.00663847	0.00858457	0.0106333	0.012469	0.0141014	0.0156111	0.0162905	0.0173079	0.0180133	0.0185582	0.0186842	0.0179487	0.0184174	0.0184662	0.0194351	0.0200277	0.0203243	0.0200673	0.0194545	0.0193157
70308740		0.00311183	0.00334726	0.00366243	0.00363977	0.00304845	0.00212565	0.00128613	0.00136259	0.00217717	0.00424885	0.00700103	0.00997926	0.012718	0.0151141	0.0184622	0.0217643	0.0243009	0.0254277	0.0252814	0.024268	0.0219648	0.0223522	0.0208792	0.020493	0.0204322	0.019464	0.0199719
70308977		0.00570111	0.00623981	0.0065595	0.00661984	0.00677012	0.00696072	0.00659988	0.00679406	0.00699817	0.00740901	0.00784912	0.0065713	0.00584665	0.00535063	0.00603669	0.0079886	0.0104125	0.0135006	0.0152574	0.0179441	0.0189154	0.0191616	0.0194529	0.0196907	0.0198358	0.0193534	0.0191879	0.018909	0.0188019	0.0186867
70309047		0.00338043	0.00343439	0.00298176	0.00269324	0.00321121	0.00437192	0.00439164	0.00550085	0.00725175	0.00949783	0.00885917	0.0117192	0.0141798	0.0171784	0.0206232	0.0231066	0.0259405	0.0274302	0.0284948	0.0289976	0.0305941	0.0306067	0.0302467	0.0304293	0.0306906	0.0295998	0.0278781
70309117		0.00339002	0.00322683	0.00264138	0.00268895	0.00422747	0.00817483	0.0103029	0.012155	0.0140113	0.015848	0.0177045	0.0192302	0.0210107	0.0222658	0.022772	0.023616	0.0252314	0.0275863	0.0292965	0.0289939	0.0280079	0.0265376	0.0252596	0.0244789	0.0242672	0.0234631	0.0228326	0.0220707
70309354		0.0022188	0.00153837	0.00104601	0.000664455	0.0011986	0.0017983	0.00357089	0.00607981	0.00734632	0.010265	0.013977	0.0163852	0.0188992	0.0230731	0.0255558	0.0258581	0.0246487	0.0235075	0.0222671	0.0215521	0.0196276	0.0175174	0.0158463
70310108		0.00350078	0.00307775	0.0029426	0.00310848	0.00348368	0.00388633	0.00392311	0.00416026	0.00432743	0.00460508	0.00554655	0.00688075	0.00615647	0.00709323	0.0087743	0.0116422	0.0149211	0.0175508	0.0188997	0.0175177	0.0205718	0.0218448	0.0242791	0.026164	0.025372	0.026129	0.0283209	0.0290753	0.0274907	0.0245872
70310275		0.00272394	0.00176403	0.0014336	0.00253129	0.00516035	0.0084195	0.0117904	0.0138833	0.0140237	0.0136235	0.0142184	0.0167059	0.0199914	0.0218281	0.0224685	0.0234891	0.0225001	0.0212393	0.0204357	0.0190094	0.0169043	0.0154483	0.0145024	0.013806	0.0131549
70310889		0.00409858	0.00420425	0.0051674	0.00499366	0.00468003	0.00418012	0.00325913	0.00222162	0.00317305	0.00518913	0.00804495	0.0110345	0.0128896	0.0143302	0.0158217	0.0199816	0.0208827	0.0245835	0.0248695	0.0255745	0.0242361	0.022883	0.0219101	0.0205882	0.0200719	0.0200431	0.0197701
70311029		0.00221228	0.00157685	0.00105824	0.000818851	0.000745596	0.00235432	0.00310833	0.00399471	0.00482612	0.00670332	0.00784197	0.00990353	0.00815921	0.00929211	0.0120768	0.0132187	0.0174997	0.0202745	0.0240347	0.0250275	0.0246326	0.0273577	0.0284052	0.0264132	0.0264356	0.0280028	0.0273369	0.025058	0.0230122
70311266		0.00368149	0.00292047	0.00214889	0.00143322	0.0010766	0.00142443	0.00214208	0.00314338	0.00445633	0.00590789	0.00737807	0.00898854	0.0110419	0.0169833	0.0169664	0.019571	0.0214683	0.0212443	0.0206291	0.0195679	0.0187633	0.0174056	0.0189722	0.0190171	0.018282	0.0170572	0.0162439	0.0161191	0.0168316	0.0186081
70311573		0.00209612	0.00188908	0.00224687	0.00271809	0.00289223	0.00287539	0.00262434	0.002197	0.00214777	0.00238121	0.00264417	0.00361977	0.00493453	0.00602816	0.00623623	0.00694455	0.00835091	0.0113427	0.0108545	0.0133393	0.0149309	0.016	0.0174673	0.0189279	0.0211243	0.0240628	0.0270483	0.0294446	0.0292797	0.0304518
70311950		0.00850788	0.00815072	0.0106647	0.0127976	0.0140606	0.0147087	0.0164092	0.0182148	0.0209252	0.0223831	0.0236152	0.0254017	0.0254772	0.0263368	0.0239266	0.0223175	0.0208027	0.0193411	0.0177442	0.0160179	0.0134837
70313318		0.00414966	0.00439098	0.00467498	0.00529112	0.00588029	0.00609197	0.00581664	0.00515841	0.0047991	0.00432837	0.00346925	0.00413823	0.0158759	0.0409741	0.0533472	0.0877134	0.135114	0.161811	0.179874	0.211673	0.213823	0.202642	0.183409	0.201313	0.188986	0.179415	0.156889	0.120395	0.0744397	0.0469292
70314309		0.0063332	0.00664672	0.00558397	0.00439531	0.00341528	0.00286695	0.00288481	0.00387287	0.00654052	0.00850098	0.0103896	0.0121882	0.0140647	0.0162085	0.0183595	0.020557	0.0225868	0.0246643	0.0260301	0.0266474	0.026837	0.0272563	0.0269211	0.0257159	0.0242434	0.0248212	0.0262241	0.0263773	0.0259122	0.0239124
70314476		0.00223772	0.000828775	0.00157585	0.00142759	0.001603	0.0014349	0.0016783	0.00159359	0.00147067	0.00246592	0.00372379	0.00568153	0.00788897	0.0103504	0.0132162	0.0161603	0.0178799	0.0197996	0.0222261	0.0249406	0.0312069	0.0361918	0.036475	0.0349695	0.0340805	0.0307852	0.026774
70314783		0.00337043	0.00379835	0.00414286	0.00437037	0.00462019	0.00480247	0.00499448	0.00501237	0.00576888	0.00691437	0.00884872	0.010993	0.0134807	0.0122729	0.016147	0.0199287	0.0220022	0.0226968	0.0252066	0.026966	0.0276325	0.0274199	0.0265156	0.0281689	0.0287786	0.0289588	0.0285265	0.0276035
70315397		0.00568959	0.00570389	0.0057406	0.00562148	0.00559353	0.0054332	0.00522477	0.00372481	0.00331731	0.00389816	0.00523308	0.0066073	0.00793429	0.00861794	0.0100141	0.0109488	0.0110573	0.0115105	0.0154184	0.0176	0.0196022	0.0214446	0.0218107	0.0213643	0.0205865	0.0212062	0.022519	0.0219568	0.0208937	0.0206642
70315914		0.00227405	0.00212402	0.00191049	0.00156327	0.00136327	0.0013808	0.00173312	0.00253775	0.00373117	0.00507871	0.00621874	0.00782665	0.00891658	0.00883449	0.00998149	0.0115652	0.0130373	0.01453	0.0162165	0.0174873	0.0182664	0.0193583	0.019136	0.0220671	0.0219708	0.0208701	0.0197988	0.0195069	0.0183807
70316151		0.00148441	0.000506211	0.000755237	0.00166956	0.00254612	0.003229	0.00343726	0.00309543	0.00252865	0.00242316	0.00337236	0.00473563	0.0063544	0.00823585	0.0102889	0.012327	0.0141066	0.0152126	0.0170835	0.0166216	0.0159946	0.0162054	0.0175121	0.0195472	0.0225176	0.0234369	0.0244327	0.0243952
70316905		0.00138341	0.00135912	0.00150003	0.00162444	0.00174841	0.00177215	0.00291172	0.00265179	0.00417859	0.0062656	0.00758519	0.009563	0.0125294	0.0146269	0.0160089	0.0174736	0.0173409	0.0190302	0.0203233	0.0209194	0.0225165	0.0227861	0.0231327	0.0243962	0.0243811	0.0241886	0.0232845	0.0222144	0.0212836
70317142		0.00182215	0.00154392	0.00308501	0.00667557	0.00893554	0.0107493	0.0127184	0.0156365	0.0190366	0.0221883	0.0245858	0.025552	0.0250866	0.024555	0.0239609	0.0246152	0.0241715	0.023659	0.0235242	0.022497	0.0205482	0.0187204
70318370		0.00339051	0.00427927	0.00518569	0.00583393	0.00566618	0.00605857	0.006081	0.00667824	0.00716728	0.00864303	0.0106786	0.0130067	0.0162536	0.0171383	0.0194955	0.021096	0.0216553	0.021346	0.021576	0.0215938	0.0219947	0.0228201	0.0235104	0.0232762	0.0221259
70318747		0.00172304	0.00118274	0.00149017	0.00173825	0.00226141	0.00331546	0.00482985	0.00366929	0.00659393	0.00838627	0.00941244	0.0123288	0.0146543	0.0153033	0.0184013	0.0207553	0.0214059	0.022501	0.0225885	0.0227763	0.0231801	0.0239482	0.0246618	0.0236707
70319361		0.00448428	0.00440485	0.00404678	0.00349124	0.00295847	0.00315862	0.00469948	0.00624655	0.00618288	0.00885893	0.0111544	0.01473	0.0195425	0.0240271	0.0230193	0.0263378	0.0283382	0.0294166	0.0311363	0.0308616	0.0278056	0.0269085	0.024966	0.0241091	0.0222131	0.0192131	0.0177226	0.0173852	0.0165569
70319501		0.00350911	0.00286184	0.00212048	0.00174772	0.00194195	0.00236145	0.00312124	0.00421027	0.00686224	0.00856066	0.00869854	0.00913312	0.0108099	0.0140876	0.0172217	0.017834	0.0191526	0.020887	0.0205853	0.0200803	0.0202408	0.0201373	0.0206765	0.0201379	0.0185739	0.016511	0.0141773	0.0124647	0.0102486	0.00860469
70320045		0.00334254	0.00374578	0.00366707	0.0043125	0.00440115	0.00577032	0.00666335	0.00699544	0.00684533	0.00635006	0.00576651	0.00575697	0.00693528	0.00885788	0.0109721	0.0133618	0.0162452	0.0192399	0.0215704	0.0217468	0.0205497	0.0179221	0.0144628	0.0133423	0.0149205	0.0184993	0.0209926	0.0216936	0.0212465	0.021369
70321106		0.00500379	0.00551436	0.00572535	0.00564371	0.00566253	0.00646136	0.00988394	0.00796232	0.0121937	0.0146863	0.0176174	0.0174971	0.0220416	0.0245411	0.0273649	0.0286386	0.0296671	0.0304473	0.0287783	0.0257754	0.0252879	0.0247203	0.0259981	0.025378	0.0244639
70321273		0.00797853	0.00684534	0.00562231	0.0042932	0.00368778	0.00412659	0.00696952	0.0105958	0.0140343	0.0175131	0.0211689	0.0244102	0.0263012	0.0269788	0.0276533	0.0282976	0.0290841	0.0283102	0.0261223	0.0238233	0.0205431	0.0191591	0.0177708	0.0158245
70321343		0.00288622	0.00274769	0.00276611	0.00302952	0.00337356	0.00396219	0.00467707	0.00571442	0.00732554	0.00946454	0.011572	0.0129418	0.0160275	0.0187831	0.0211544	0.023108	0.0247893	0.026635	0.0283289	0.0290028	0.0283355	0.0282566	0.0283963	0.0282609
70322027		0.00493649	0.00413494	0.00298405	0.00281719	0.00300768	0.00441577	0.00776227	0.010835	0.012713	0.0144225	0.0163151	0.0160361	0.0187588	0.022799	0.0261953	0.0278977	0.0274195	0.0282186	0.0271314	0.0260226	0.0244652	0.0233893	0.0226706	0.0217794	0.019684	0.0165608
70323255		0.00459373	0.00506079	0.00562234	0.00598568	0.0060799	0.00610084	0.00613287	0.00576821	0.00491321	0.00393105	0.00391972	0.00448546	0.00685532	0.00965018	0.0120309	0.0131439	0.0155217	0.0178275	0.0191725	0.0197081	0.0204727	0.0208097	0.0208072	0.0211807	0.020704	0.0199976	0.0185868	0.0180426
70323869		0.00147978	0.00185078	0.00240948	0.00276429	0.00299249	0.00324972	0.00373134	0.00480204	0.00639517	0.00815329	0.00811868	0.00989934	0.0109837	0.012575	0.013707	0.0164253	0.0204702	0.0232545	0.0269459	0.0280764	0.0280717	0.0284722	0.0286315	0.0276071	0.0250053	0.0214825
70324790		0.00177179	0.00243386	0.0029851	0.00317793	0.00316919	0.00279302	0.00223248	0.00183034	0.00214985	0.00295758	0.00373755	0.00450263	0.00571223	0.00567178	0.00762565	0.00799602	0.0118801	0.0151907	0.0175286	0.0188166	0.0224623	0.0240125	0.0266969	0.0258404	0.0240946	0.0232844	0.0220911	0.020477	0.019644	0.0191996
70324930		0.00383761	0.00341862	0.00316685	0.00319959	0.00372264	0.00346502	0.00369623	0.00394708	0.00368834	0.00405982	0.00378581	0.00386482	0.00416283	0.0044436	0.00502792	0.00692079	0.00904854	0.0108545	0.0117119	0.0137125	0.0186026	0.0213579	0.0226258	0.0218858	0.0207772	0.0216985	0.0221794	0.0230336	0.0230711	0.0224283
70325097		0.00339584	0.00472971	0.00509756	0.00517837	0.00572372	0.00668734	0.00820074	0.0102854	0.0119671	0.014453	0.0152123	0.0168044	0.0196049	0.0202924	0.0212969	0.021397	0.0221001	0.0235175	0.0239788	0.0247642	0.0229621	0.0223352	0.0197608
70325167		0.00259265	0.0024443	0.00148263	0.00100053	0.00141108	0.00230975	0.00265223	0.00266919	0.0042644	0.00700538	0.0103137	0.0134148	0.0153553	0.0164613	0.0191192	0.0213823	0.0238919	0.0261165	0.0274886	0.029101	0.0289916	0.0273287	0.0241872	0.022025	0.021121
70325237		0.00368612	0.00441191	0.00469873	0.00480897	0.00446544	0.00439302	0.00427389	0.00437313	0.00432139	0.00513462	0.00685004	0.00863288	0.0111829	0.0143153	0.0183861	0.0209116	0.0221347	0.0217752	0.0219615	0.0227244	0.0221885	0.0219128	0.0226091	0.0221395	0.021993	0.0214307	0.0213383	0.0203631	0.0190802
70325781		0.00486302	0.0044961	0.00418459	0.00410947	0.00447094	0.00501541	0.00535821	0.00521579	0.00466021	0.00417322	0.00413551	0.0034518	0.00366924	0.00423459	0.00564442	0.00658015	0.00767464	0.00939942	0.0109409	0.0119522	0.0131456	0.0139146	0.0154745	0.0151828	0.0168825	0.0180288	0.0186515	0.0205176	0.0217151	0.0224272
70325921		0.00103019	0.0012821	0.00119454	0.000935011	0.000618111	0.000483761	0.00137453	0.00274635	0.00385834	0.00514254	0.00699822	0.00835239	0.00890096	0.00936064	0.0106973	0.012426	0.0156894	0.0186506	0.0207459	0.0222042	0.0231479	0.024187	0.0235282	0.0230056	0.0244377	0.0227635	0.0221439	0.0207061
70327079		0.00505177	0.00456768	0.00465416	0.00464738	0.00497814	0.00607066	0.00748739	0.00904793	0.0108592	0.0130777	0.0158165	0.0185196	0.0206046	0.0212831	0.0209185	0.0235374	0.0220722	0.0233386	0.0256196	0.0263758	0.0258729	0.0242458	0.0220789	0.0206009	0.0174932	0.0157631	0.0151225
70327386		0.0031242	0.00345379	0.00391148	0.004853	0.00606205	0.00738298	0.0067408	0.00843733	0.0101894	0.0126271	0.0155123	0.0178371	0.0205061	0.0214419	0.0223055	0.0234171	0.0246576	0.024701	0.0248031	0.0246307	0.0230688	0.0215337	0.0208607	0.019791	0.018001
70327456		0.00670598	0.00618212	0.00542329	0.0062338	0.00529204	0.00365859	0.00287439	0.00355903	0.00177412	0.00236186	0.00294163	0.00480233	0.00632131	0.00648833	0.0100408	0.0136583	0.0176374	0.0209845	0.0197787	0.0216477	0.0238343	0.0265822	0.0291951	0.0303002	0.028504	0.0269432	0.0255247	0.0236908	0.0214017	0.0192272
70327526		0.00323502	0.00261579	0.00228124	0.00189112	0.00160598	0.00178846	0.00217317	0.00219532	0.00189295	0.00168763	0.00252982	0.00419001	0.00608507	0.00630911	0.00930091	0.0126526	0.0157369	0.018919	0.0221949	0.0244791	0.0274516	0.0250522	0.0247893	0.0237903	0.0239814	0.0240845	0.0229585	0.0215264	0.0191926
70328377		0.00147943	0.000651184	0.0010698	0.00166293	0.00193049	0.00204138	0.00237092	0.00352678	0.00548287	0.00813395	0.0107423	0.0126964	0.0138459	0.0136289	0.0142246	0.0163911	0.0176841	0.0184735	0.0194844	0.0223481	0.0242603	0.0249766	0.0258707	0.0261334	0.024616	0.0234247
70328684		0.00315995	0.00392409	0.00587896	0.0080707	0.00765696	0.0112535	0.0131644	0.014361	0.0139282	0.0161202	0.0181578	0.0217042	0.0230832	0.0253441	0.0266055	0.025132	0.0225837	0.0204572	0.019371	0.018603	0.0181496	0.0173622	0.017024	0.0159242
70330973		0.00261364	0.00248401	0.00258848	0.00234516	0.0023835	0.00247532	0.00318757	0.00499044	0.00731252	0.00953912	0.0153256	0.0112979	0.0178105	0.0154997	0.0170435	0.0177996	0.0186706	0.0202458	0.0218375	0.022728	0.0223459	0.021493	0.0211895	0.020767	0.0208614	0.0198337	0.0191726	0.0169225	0.0150041
70331113		0.00471168	0.00541797	0.00594564	0.00621076	0.00631299	0.00621548	0.00623276	0.0060254	0.00667803	0.00752244	0.00934837	0.0117032	0.0147887	0.0183245	0.0213657	0.0212131	0.0244144	0.0267641	0.0271712	0.0259091	0.0247713	0.0244668	0.0264932	0.0275727	0.0259574	0.0275109	0.0270471	0.0220388
70333332		0.0052767	0.00604462	0.0063252	0.00647949	0.00637398	0.00693065	0.00730777	0.00780466	0.00928643	0.0101438	0.0101565	0.012262	0.0136386	0.0141858	0.0152529	0.0158247	0.0172462	0.0183029	0.0199865	0.0207732	0.0206995	0.0198511	0.01979	0.0193958	0.0198224	0.0210761
70334323		0.0041594	0.00411369	0.00406849	0.00377938	0.00358383	0.00400745	0.00543465	0.00713017	0.00879316	0.0107201	0.0126977	0.0141182	0.0148402	0.015976	0.0179668	0.0196576	0.0205626	0.0194358	0.0198622	0.0204352	0.021116	0.0216039	0.0217316	0.0215137	0.0211067
70334867		0.00711736	0.00540623	0.00372399	0.00189103	0.00149444	0.000919081	0.0004078	0.000994235	0.00187927	0.00269233	0.00351846	0.00417393	0.00487469	0.00538832	0.00605493	0.00626572	0.00705557	0.00828847	0.00978573	0.00990664	0.0115303	0.0112751	0.0129141	0.0138488	0.0137928	0.014549	0.0158758	0.0162579	0.0174978	0.0191617
70335007		0.0058057	0.00518238	0.00454619	0.00460496	0.00442826	0.00447065	0.00450843	0.00465939	0.00445272	0.00436152	0.00399947	0.00333343	0.00285515	0.00282655	0.00262251	0.00287184	0.00372642	0.00486187	0.00686372	0.0100268	0.0120159	0.0139102	0.0168062	0.0197333	0.0217596	0.0237134	0.0243439	0.0255055	0.0252105	0.0262432
70335174		0.00588415	0.00721086	0.00883988	0.0104352	0.0114246	0.0122993	0.0139547	0.0159756	0.0178434	0.0191468	0.0195101	0.0198344	0.020439	0.0213425	0.0224977	0.023516	0.0241808	0.0239023	0.0228262	0.0217895	0.0214144	0.0212812	0.0213056	0.0211791	0.0196199	0.0181101
70337533		0.00379009	0.00451669	0.00482946	0.00537604	0.00574894	0.00636693	0.00774241	0.00936002	0.0110852	0.0136607	0.0158562	0.0168877	0.0169306	0.0167212	0.0189882	0.0221666	0.0244361	0.0251617	0.0235447	0.0219794	0.0214855	0.0215776	0.0222871	0.0227361
70337603		0.00442656	0.004658	0.00490088	0.0055637	0.00664614	0.0078176	0.00911535	0.0106821	0.0121312	0.0123937	0.0134307	0.014419	0.0163506	0.0174057	0.0182792	0.0178674	0.01828	0.0179709	0.0183323	0.0188679	0.0193894	0.0192683	0.0186074	0.0173712
70337910		0.00668987	0.00629759	0.0077067	0.00768939	0.00738159	0.00769542	0.00808046	0.00851017	0.00896436	0.00975749	0.00900281	0.0100059	0.0110155	0.0118462	0.0125515	0.0131158	0.0148103	0.0124795	0.0115047	0.0122518	0.0137502	0.0159712	0.0178032	0.0183135	0.0185785	0.0176086	0.0159745
70338147		0.00480385	0.00473253	0.00457198	0.00522537	0.00533544	0.00459959	0.00445102	0.00478055	0.00568638	0.00691725	0.00841155	0.00870251	0.0107089	0.0138852	0.0171728	0.0188012	0.0182837	0.0202349	0.0220068	0.0217382	0.0224867	0.0226629	0.0229684	0.0227316	0.0217085	0.0202188	0.0182027
70338524		0.00189671	0.0024161	0.00283984	0.00344787	0.00451965	0.00610888	0.00739803	0.0103507	0.0144352	0.0181039	0.0208793	0.0230018	0.0226985	0.0238399	0.0232597	0.0222178	0.0224347	0.0237706	0.0236458	0.0245138	0.0237518	0.0220523	0.0211119	0.0203639
70338831		0.00625739	0.0062742	0.00583572	0.00573404	0.00534523	0.00580149	0.00550441	0.00495683	0.00460368	0.00449517	0.00362421	0.00468885	0.00694096	0.00671629	0.0103115	0.0128382	0.0126919	0.0154886	0.0180834	0.0182771	0.0199705	0.0218368	0.023304	0.0249845	0.025992	0.0269669	0.0302466	0.0306988	0.0327997	0.0287674
70339068		0.0034371	0.00335413	0.0030907	0.00262574	0.00204106	0.0014861	0.00110643	0.00143241	0.00271651	0.00462121	0.00590519	0.00787532	0.0106164	0.0127759	0.014413	0.0147214	0.018582	0.0233404	0.0269179	0.0286104	0.0299629	0.0297799	0.028994	0.0271556	0.0249914
70339138		0.00249185	0.00199115	0.00134998	0.000945252	0.0010757	0.00111585	0.00244222	0.00509294	0.00808234	0.0109034	0.0130962	0.0162674	0.0186417	0.0197222	0.0230676	0.0259228	0.026557	0.0272519	0.0259642	0.0258184	0.0248789	0.0247665	0.0241469	0.0229078	0.0211065	0.0190339
70339822		0.00236417	0.00250986	0.00253038	0.00258662	0.00280334	0.00282535	0.00252953	0.00296338	0.00303241	0.00357415	0.00680665	0.00785945	0.00908595	0.010141	0.0133489	0.0145875	0.0164398	0.0185684	0.0197664	0.0221924	0.0208063	0.0205674	0.0201154	0.0213365	0.0227791	0.0243944	0.025897	0.0263579	0.0252552	0.0259777
70340436		0.00431924	0.0034497	0.00281551	0.00238666	0.00226077	0.00271492	0.00379803	0.00528051	0.00688475	0.00841675	0.00964057	0.010267	0.0108934	0.0113191	0.012094	0.0134079	0.0148983	0.0161851	0.0174217	0.0178384	0.0189044	0.0203676	0.0208695	0.0217296	0.0229627	0.0239287	0.0246907
70340980		0.0035947	0.00326562	0.00293424	0.00379342	0.00378997	0.00405618	0.0043395	0.00431577	0.00459695	0.00493591	0.00477896	0.00462042	0.00469779	0.00478445	0.00572597	0.00721758	0.00892893	0.00939981	0.011259	0.0140967	0.0176652	0.0231647	0.0280882	0.0312767	0.0332888	0.0331685
70341050		0.00225875	0.00244759	0.00268978	0.00259911	0.00284728	0.00338335	0.00338861	0.00490045	0.00864676	0.00949459	0.0133672	0.0168839	0.0190424	0.0204891	0.0209341	0.0222534	0.0239927	0.0262661	0.0275967	0.025986	0.0237005	0.0223716	0.0217889	0.0202042	0.0177714	0.0185524	0.01803
70341357		0.00163559	0.00178921	0.00215497	0.00240069	0.00317175	0.00429731	0.00579217	0.00717896	0.00828301	0.00933749	0.0106154	0.0115808	0.0168776	0.0198295	0.0216537	0.0230238	0.0235498	0.0241217	0.0228971	0.0214311	0.0205746	0.0193553	0.0178976	0.0164226
70341664		0.00465247	0.00442139	0.00434655	0.00434704	0.00646133	0.00937909	0.0123456	0.0150157	0.0165608	0.0177529	0.0194505	0.0213432	0.0242645	0.0269161	0.0282459	0.0273909	0.027241	0.0247197	0.0233096	0.0212103	0.0202935	0.020255	0.0201492
70341734		0.00780832	0.00783604	0.00845432	0.00839472	0.010321	0.0107415	0.0117238	0.0131974	0.0151019	0.0158792	0.0168519	0.0175392	0.0184005	0.0196531	0.0205824	0.0212144	0.0211605	0.0200331	0.0187388	0.017737	0.0171698	0.0166464	0.0158261	0.014924
70341971		0.00397155	0.00369605	0.00357186	0.00357635	0.00348471	0.00323921	0.00281442	0.00247525	0.00286837	0.0035197	0.00379412	0.00354712	0.00280776	0.00195545	0.00157541	0.00190907	0.00289487	0.00431929	0.00618975	0.00832075	0.0107572	0.0135351	0.0161726	0.0178473	0.0170704	0.0150044	0.0141386	0.0142289	0.0157595	0.017395
70342278		0.0039182	0.0028309	0.00385565	0.0055467	0.00843935	0.0105931	0.0120946	0.0110609	0.0122864	0.014916	0.0149156	0.0156934	0.0175012	0.0195835	0.0217681	0.0243795	0.0266551	0.0257667	0.0246751	0.0207524	0.0176957	0.0167223	0.0154143	0.0137879	0.0121232	0.0109519	0.0102294
70342418		0.00305382	0.00598754	0.00803227	0.0107293	0.0137176	0.0177957	0.0209424	0.0234643	0.0259603	0.0284488	0.0302589	0.0297012	0.0256222	0.0242552	0.022321	0.0224554	0.022827	0.0234125	0.0229358
70342725		0.00308925	0.00339859	0.00369841	0.00419269	0.00520435	0.00681047	0.00865233	0.0109157	0.013506	0.0156003	0.0169758	0.0167184	0.01712	0.01715	0.0186726	0.0196526	0.0209635	0.0210102	0.0218864	0.0242049	0.0242821	0.0257269	0.0256494	0.027147	0.0262468	0.0242058
70342892		0.0037491	0.00308268	0.00264628	0.00231711	0.00273991	0.00263489	0.00266022	0.00259458	0.00263424	0.00287476	0.00327922	0.00376034	0.00420545	0.00446785	0.00441978	0.0037483	0.00321701	0.00303217	0.00371118	0.004204	0.00407282	0.00744948	0.00931361	0.011908	0.0149112	0.0175863	0.0196283	0.021123	0.0233229	0.0231977
70342962		0.00527202	0.00561591	0.00559206	0.00554256	0.00541253	0.00589051	0.0073831	0.010199	0.0135942	0.0174036	0.0209835	0.0232348	0.0270601	0.0289806	0.0291494	0.0298978	0.0295108	0.0276194	0.0256278	0.0245765	0.0225943	0.0228166	0.0216213
70343883		0.00454654	0.00385942	0.00305635	0.00255427	0.00275779	0.00268051	0.00314311	0.00394168	0.00477984	0.00585743	0.00933793	0.011987	0.0142411	0.016149	0.0177902	0.0185655	0.0206005	0.0213127	0.0198165	0.0207349	0.0191047	0.0179517	0.0172978	0.0165875	0.0161219	0.0161771	0.0160049	0.0161146	0.015127
70343953		0.00247206	0.00298938	0.00359449	0.00417059	0.00491034	0.00528704	0.0052743	0.00467617	0.00458053	0.00475896	0.00528273	0.0054541	0.00562458	0.00625679	0.00769151	0.0103411	0.0123635	0.0131802	0.0132962	0.0152687	0.0154781	0.0185107	0.0200826	0.0234864	0.0230584	0.0229969	0.0218418	0.0205417	0.0194365	0.0181966
70344190		0.00192596	0.0041683	0.00537603	0.00543669	0.00541836	0.00580052	0.00717112	0.00906863	0.0119132	0.00966091	0.011464	0.012691	0.0126234	0.0142496	0.0155012	0.0167808	0.0191786	0.0208179	0.022435	0.0231619	0.0245907	0.0243241	0.0225111	0.0208732	0.0195622	0.0178933	0.0168819	0.0164779	0.0158676	0.015094
70344944		0.00489593	0.00472484	0.00433628	0.00466456	0.00437759	0.00403584	0.00399674	0.00421841	0.00506605	0.00631056	0.0082817	0.00832561	0.00995461	0.0108932	0.0117228	0.0136315	0.0167212	0.0187414	0.0208988	0.0214786	0.0217492	0.0219351	0.0234672	0.0239812	0.024703	0.0237409	0.0241058	0.0256881
70345014		0.00417239	0.00333643	0.00299141	0.00268359	0.00249446	0.00266536	0.00266128	0.00259965	0.00187306	0.00129691	0.00160883	0.00253296	0.00589302	0.00828965	0.0121008	0.013348	0.0149146	0.016955	0.0205003	0.0217127	0.0248537	0.0286827	0.0285436	0.0302926	0.0286868	0.0275164	0.0249813	0.021455	0.019712	0.0187065
70345795		0.0043744	0.00462286	0.00424506	0.00357837	0.00304191	0.00290504	0.00301276	0.00294268	0.00287126	0.00323319	0.00347223	0.00339661	0.00534117	0.00859803	0.0124515	0.0165772	0.0209987	0.024587	0.0262441	0.025465	0.0247398	0.0254548	0.0269253	0.0282178
70345865		0.0042974	0.00435999	0.00394237	0.00320811	0.00282495	0.00326526	0.0039877	0.00374311	0.00303867	0.00201794	0.00589844	0.00626259	0.0083354	0.0120967	0.0153413	0.0184307	0.0191089	0.0213799	0.021486	0.0243741	0.0240491	0.0238534	0.025151	0.0253148	0.0251256	0.0251739	0.0242254	0.0221163	0.0201799	0.0180638
70345935		0.00375212	0.00354064	0.00344331	0.00327437	0.0028898	0.00272317	0.00324246	0.00384888	0.00378688	0.00373008	0.00380752	0.00418891	0.00503195	0.0072351	0.0101628	0.0124063	0.015009	0.0182257	0.0210407	0.0235302	0.024826	0.0255247	0.02557	0.026176	0.0267026	0.0271407	0.0271419
70346005		0.00209896	0.00239662	0.0026237	0.00317736	0.00242999	0.00193126	0.00273433	0.00413198	0.00572721	0.00529329	0.00785363	0.00697813	0.00976875	0.0115621	0.013403	0.016385	0.0187739	0.0214547	0.0226123	0.023762	0.0226063	0.0218465	0.0208701	0.0202622	0.0198421	0.0194801	0.0165137	0.0144497	0.0126391	0.0120031
70346312		0.00275248	0.00306334	0.00313166	0.00391474	0.0031866	0.00176651	0.00526927	0.0188288	0.0508681	0.0509704	0.0364755	0.0168267	0.0129073	0.0166628	0.0192741	0.0224266	0.0253423	0.0278095	0.0293759	0.0321498	0.0327399	0.0321845	0.0304094	0.0285758	0.0260768	0.0275056	0.0239122	0.0229902
70346786		0.00474865	0.00435812	0.00353911	0.00316691	0.0031584	0.00331758	0.00414413	0.00342656	0.00421273	0.0053947	0.00555985	0.00762482	0.00906712	0.00958273	0.0118013	0.0158976	0.0199862	0.0245947	0.0268691	0.0252838	0.0238801	0.0239651	0.0228892	0.0222234	0.0217534	0.0225512	0.0232831	0.0239498	0.0253039	0.0263678
70347610		0.00415964	0.00372798	0.00307388	0.00297815	0.0032479	0.00445796	0.0059032	0.0063993	0.00901548	0.0122398	0.0160416	0.0196649	0.0225283	0.0212863	0.0217399	0.0207466	0.0197111	0.0193556	0.0196456	0.0218444	0.0248256	0.0267532	0.0259361	0.0247645	0.0236549
70347917		0.00462612	0.00410992	0.00412709	0.00492948	0.00548398	0.00634427	0.00754556	0.00918739	0.010956	0.0127277	0.0141494	0.0151945	0.0164422	0.0180114	0.0189383	0.0198672	0.0206273	0.0217969	0.0226251	0.0220932	0.0220234	0.0208462	0.0187033	0.017455	0.0169572	0.0163766	0.0158238	0.0146447
70348084		0.0017964	0.00228447	0.00258376	0.00297933	0.00362007	0.00415262	0.00438389	0.00433438	0.00454985	0.0049613	0.00549944	0.00616492	0.00698813	0.00894955	0.010231	0.0102012	0.0126161	0.0145965	0.0175039	0.0210063	0.0231879	0.0237474	0.0234281	0.0221773	0.0220234	0.0217989	0.0223049	0.0228969
70348154		0.00210004	0.00283169	0.00301857	0.00334301	0.00377024	0.00392812	0.00382057	0.00509183	0.00681676	0.009039	0.0114823	0.0139164	0.0164601	0.0188441	0.0205625	0.0208684	0.0198876	0.0184014	0.0181627	0.0187588	0.0197419	0.0201302	0.0201825	0.0197568	0.0191888	0.0181118	0.0166922	0.0154009
70348601		0.00322342	0.00301482	0.00296589	0.00275157	0.00280747	0.00296454	0.00352581	0.00427064	0.00578916	0.00673545	0.00782019	0.00709079	0.00723211	0.0112641	0.0141838	0.0170995	0.0214658	0.0231943	0.0248435	0.0254095	0.0270276	0.0286368	0.0312218	0.0322224	0.0320435
70349145		0.00265692	0.00261438	0.00333874	0.00365779	0.00382364	0.00384422	0.00379306	0.0038598	0.00372918	0.00337162	0.00352572	0.00472262	0.0068457	0.00944477	0.0117578	0.0132396	0.0144428	0.0172066	0.0192174	0.0206844	0.0230686	0.0254667	0.0269216	0.0270568	0.0265429	0.0248798
70349215		0.00404159	0.00432192	0.00456494	0.00507956	0.00590003	0.00681083	0.00759505	0.00835427	0.00848501	0.00945835	0.0118802	0.0149824	0.0170237	0.0177856	0.0187362	0.0216001	0.0241107	0.0250449	0.0246902	0.0264136	0.0287609	0.0307495	0.030407	0.0308734
70349759		0.0058212	0.00440171	0.00287469	0.00181698	0.00201424	0.00191297	0.00324572	0.00454296	0.00581474	0.00735126	0.00828528	0.0112033	0.011373	0.0136059	0.0156953	0.0175436	0.0194324	0.0204335	0.0214793	0.0230234	0.0229826	0.0226798	0.0234992	0.0229281	0.0221033	0.0229985	0.0240314	0.0255897
70350206		0.00229027	0.00273222	0.00293057	0.00312688	0.00303595	0.00321053	0.00338977	0.00368854	0.00404774	0.00402609	0.00401713	0.00408666	0.00430509	0.00522954	0.00668539	0.00768714	0.00947023	0.012699	0.0159034	0.0186608	0.0211148	0.0231218	0.0247263	0.0257083	0.0263797	0.0253051	0.0245079	0.0234699	0.0232832	0.0212898
70351504		0.00854772	0.00845323	0.00794023	0.00687664	0.00598786	0.00568685	0.00474774	0.00374303	0.00365045	0.00382835	0.00404887	0.0045839	0.00386027	0.0024206	0.00133184	0.00320791	0.00713074	0.011427	0.0153067	0.0193036	0.0224389	0.0270949	0.0307477	0.0358904	0.0372112	0.0345687	0.0307699
70352802		0.00607735	0.00550903	0.00506115	0.00462903	0.00424618	0.00409918	0.00430298	0.00488431	0.00589301	0.00730597	0.00931391	0.012014	0.015329	0.018766	0.021758	0.0239764	0.0248703	0.0249834	0.0259506	0.0269138	0.02809	0.0281862	0.0282335	0.0265444	0.0251193
70353346		0.00226617	0.00243966	0.00256318	0.00254475	0.00238272	0.00269263	0.00328969	0.00385318	0.00432563	0.00580206	0.00637505	0.00744608	0.00846505	0.00923392	0.0106814	0.0123338	0.0169714	0.0202691	0.0246239	0.0270029	0.0273296	0.0257368	0.0254367	0.0235471	0.0239034	0.0237214	0.0252169
70353960		0.00405799	0.00323034	0.00239981	0.00288219	0.0040015	0.00335706	0.00679319	0.00694925	0.00875443	0.0138471	0.0161566	0.0155917	0.017773	0.0196817	0.0198452	0.0222604	0.022748	0.0258934	0.027377	0.0266966	0.0249747	0.0203018
70355021		0.0070604	0.00701287	0.00652447	0.00546043	0.00373148	0.00457762	0.00480878	0.00844011	0.0117417	0.014705	0.0156104	0.0170245	0.0170128	0.0136832	0.0147359	0.0172167	0.0202398	0.0241109	0.0227088	0.0244748	0.0204998	0.0190232	0.0189659	0.0191161	0.0197565	0.0203283
70355328		0.00300592	0.0032666	0.00363738	0.00378859	0.00378372	0.00354331	0.00312446	0.00273037	0.00222813	0.00220222	0.00255735	0.00254601	0.00272906	0.00320261	0.00326719	0.00459717	0.00484854	0.00634783	0.00827365	0.0111652	0.0107936	0.0140865	0.0130775	0.0156264	0.017484	0.0180136	0.0184643	0.0193848	0.0217603	0.0245329
70355872		0.00117623	0.00113916	0.00195204	0.00268223	0.00327405	0.0046073	0.00750819	0.0115475	0.015631	0.0181375	0.0160177	0.0190105	0.0202912	0.0199149	0.0189091	0.0169824	0.0163061	0.015774	0.0166384	0.0177403	0.0187557	0.0195363	0.0178842	0.01507
70357170		0.0011863	0.00203519	0.00296062	0.00300159	0.00432289	0.00543977	0.00623843	0.00707975	0.00702429	0.00730758	0.00854114	0.00986905	0.0120423	0.0134219	0.0139791	0.0152188	0.0172661	0.0200304	0.0210179	0.020892	0.0203073	0.0204931	0.0213951	0.0206337	0.0204516	0.0221652	0.0238185	0.0265229	0.0308406	0.032901
70357547		0.00279722	0.00219368	0.00249495	0.00129187	0.00100871	0.00248687	0.00454712	0.00691726	0.0101983	0.0136683	0.0175577	0.0202939	0.0190441	0.0201269	0.0215162	0.0234139	0.0244706	0.0255109	0.0260013	0.0258783	0.0248768	0.0230239	0.0218069	0.0207879
70358231		0.00355314	0.0027527	0.00174845	0.000986939	0.00113665	0.00118152	0.00120998	0.00159657	0.00192746	0.00224093	0.00215247	0.00213331	0.00199493	0.00257608	0.00332027	0.00559174	0.00519495	0.00593717	0.00818842	0.0103066	0.0118678	0.0116935	0.0126786	0.0134646	0.0151721	0.0174809	0.0200299	0.0212695	0.0218969	0.0223787
70358468		0.00752973	0.00734214	0.00662002	0.00548518	0.00401074	0.00514893	0.00511716	0.00339268	0.00316738	0.00296967	0.00332398	0.00350858	0.00587968	0.00771608	0.0118086	0.014638	0.0166132	0.0148884	0.0169973	0.0172572	0.0208102	0.0238291	0.0257646	0.0276757	0.0277927	0.0263496	0.0256398	0.0242852	0.0233836	0.0226799
70359696		0.00290528	0.00329083	0.00324672	0.0039508	0.00473083	0.00530583	0.00549474	0.00517118	0.00467716	0.00478976	0.00617705	0.00852949	0.0138889	0.0157256	0.0171439	0.0183867	0.0190338	0.0187109	0.01853	0.0181606	0.0185606	0.0200036	0.0219718	0.0246439	0.024421
70359766		0.0040598	0.00367743	0.00329652	0.00327848	0.00323469	0.00350445	0.00353852	0.00439615	0.00523808	0.00536387	0.00585771	0.00549734	0.0044878	0.00416629	0.00609866	0.00835351	0.00857657	0.0193661	0.0243384	0.0263389	0.0232746	0.0224021	0.0228106	0.0224489	0.0241027	0.0226817	0.0222643	0.0206904	0.0191549	0.0171505
70359836		0.00297612	0.00194345	0.00214353	0.002746	0.00367097	0.00397597	0.00371193	0.00317099	0.00308596	0.00449334	0.0051052	0.00684665	0.00971133	0.00754444	0.0110703	0.0152401	0.0193499	0.0226367	0.0248103	0.0261881	0.0270055	0.026768	0.0254383	0.0232495	0.021237	0.0200827	0.0185347
70359906		0.00513889	0.00521949	0.00462338	0.00525274	0.00467135	0.00407832	0.00437431	0.00379156	0.00581507	0.00529743	0.00639197	0.00682131	0.00721154	0.00810093	0.00846761	0.00935582	0.0123577	0.0147254	0.0174118	0.0181792	0.0189659	0.0189968	0.0193203	0.0198614	0.0203446	0.02099	0.0221529	0.0241711	0.0242595	0.0254244
70360073		0.00465598	0.00543534	0.00580672	0.00616845	0.00635397	0.00655748	0.00712149	0.0081838	0.00955479	0.0116915	0.0133145	0.0143387	0.0139677	0.0153152	0.0176929	0.0200304	0.0223667	0.0249997	0.0283305	0.0303655	0.0312435	0.0322743	0.0310368	0.0284516	0.0282441	0.026316	0.0231605
70360520		0.00569629	0.00737811	0.00819794	0.00789321	0.00745109	0.00600802	0.00509428	0.00419547	0.00324237	0.00277907	0.00561686	0.00999105	0.0148233	0.0225847	0.0241867	0.0244463	0.0243071	0.0238175	0.022955	0.02196	0.0214788	0.0214211	0.0211449	0.0209737
70360687		0.0024807	0.0034085	0.00321086	0.00609848	0.0074193	0.00842483	0.0121515	0.0176058	0.0178452	0.0204394	0.021163	0.0216558	0.0221737	0.0257076	0.0273943	0.0304983	0.0307099	0.0281458	0.0259137	0.0231116	0.0204227	0.0185702
70361371		0.00505061	0.00558997	0.00587857	0.00574469	0.00626729	0.00697835	0.00771311	0.00800979	0.00859431	0.00980563	0.0116425	0.0135182	0.0154462	0.0181342	0.0221514	0.0264142	0.0289584	0.0279975	0.0265201	0.0229674	0.0206599	0.0198489	0.0183626	0.0166103	0.0151837	0.0136418
70363283		0.00254005	0.00321406	0.00413584	0.00550722	0.0074862	0.00628768	0.00867945	0.0116459	0.0151349	0.0186695	0.0168778	0.0191086	0.0206138	0.0243521	0.0271017	0.0310414	0.0283762	0.0282485	0.028024	0.0284499	0.0283278	0.0277944	0.0259781	0.0243942	0.0221206	0.0192995	0.017528	0.0156955
70363423		0.00361392	0.0035383	0.0039784	0.00436187	0.00453769	0.004873	0.00677961	0.0100194	0.0129478	0.0154163	0.0168011	0.0196597	0.0195014	0.020533	0.0215008	0.0235022	0.0247636	0.0273953	0.0294612	0.0294685	0.0265415	0.0252937	0.022415	0.0201022
70363660		0.00317931	0.00337081	0.00363806	0.00388114	0.0040371	0.00455763	0.00489608	0.00649998	0.00834492	0.0104548	0.0131864	0.0169621	0.0215046	0.0254546	0.0283359	0.0299638	0.0299715	0.0277012	0.023622	0.0214084	0.0178776	0.015237	0.0138893	0.0137761	0.0144123	0.0152549	0.0177014	0.0180575	0.0199272
70364344		0.00925631	0.00858632	0.00781106	0.00668003	0.00559894	0.00475235	0.00438975	0.00391651	0.0036835	0.0039782	0.00488485	0.00607111	0.00590886	0.00684502	0.00720905	0.00661383	0.00536654	0.00400999	0.00332705	0.0038129	0.0050116	0.00658114	0.00847782	0.0106194	0.0127844	0.0147438	0.0165402	0.0184348	0.0204308	0.0220257
70364414		0.00315033	0.00173067	0.00106612	0.00212142	0.00337028	0.00497495	0.00518359	0.00535194	0.00536639	0.00478781	0.00449424	0.00439867	0.00443313	0.00537332	0.00560517	0.00780512	0.0105825	0.0130596	0.0152248	0.0187911	0.0201987	0.0209504	0.0211911	0.0216426	0.022495	0.0245469	0.0263764	0.0260505	0.0246921	0.0238209
70364651		0.00447148	0.00377618	0.00306736	0.00249021	0.00190503	0.00155179	0.00141342	0.00126625	0.00119389	0.00192918	0.0025408	0.00177254	0.00377399	0.00618067	0.00839313	0.0105376	0.0124274	0.0147278	0.0179011	0.0193914	0.0196607	0.0189619	0.0200874	0.0232093	0.026448	0.0298158	0.0309977	0.0293469	0.0281857	0.025044
70364721		0.00469798	0.00452131	0.00431758	0.00352023	0.00303129	0.00315659	0.00344363	0.00400419	0.00458993	0.0051798	0.00572475	0.00597839	0.00526834	0.00564904	0.00557817	0.00606193	0.00668693	0.00785181	0.0102268	0.0134592	0.0171652	0.0198975	0.0213435	0.0216149	0.0219409	0.0231288	0.0246718	0.0253141	0.026052	0.0260604
70364888		0.00211192	0.00130678	0.00128985	0.0013732	0.00175202	0.00214458	0.00260994	0.00325107	0.00354351	0.00398096	0.00514331	0.00675575	0.00548909	0.00605847	0.00660142	0.00987395	0.0140224	0.0151447	0.017864	0.0199908	0.0210258	0.0230606	0.0242454	0.0259549	0.0272866	0.0273525	0.0257398	0.0252511	0.0256149	0.0252446
70364958		0.00210712	0.00246961	0.00225564	0.00224843	0.00300952	0.00638724	0.00613296	0.00778085	0.00782673	0.00791068	0.00891645	0.0104857	0.0124824	0.0138975	0.0167945	0.0215011	0.0252269	0.0265596	0.0257785	0.0225761	0.0199171	0.0197301	0.019833	0.0208789	0.021147
70365572		0.00210699	0.00187325	0.00182145	0.0019745	0.00238558	0.00353189	0.00520074	0.00655172	0.00731643	0.00838969	0.00978855	0.0117819	0.0151048	0.0190131	0.0219073	0.0250985	0.024545	0.0237795	0.0245237	0.0224126	0.0201204	0.0184749	0.0189978	0.0195745	0.0188368
70365949		0.00471128	0.00492743	0.00513239	0.00507862	0.00484746	0.00388856	0.00286942	0.00381608	0.00360552	0.00395972	0.00576525	0.00982982	0.0143516	0.0177257	0.0193879	0.0211708	0.0245975	0.0239113	0.0260218	0.0248644	0.0226843	0.0204734	0.019317	0.0183786
70366493		0.00435345	0.00443385	0.00438469	0.00414027	0.00372272	0.00321556	0.00287998	0.00387397	0.00653505	0.00939662	0.010892	0.0141696	0.0184157	0.0219597	0.0250302	0.0264627	0.0268013	0.025367	0.0243074	0.0234002	0.0233787	0.0230752	0.0229482	0.0224248	0.0223499
70367317		0.00152077	0.00166638	0.00176887	0.00194224	0.00211565	0.00279516	0.00470838	0.00804986	0.0120588	0.0163198	0.020377	0.0238114	0.0262136	0.0262306	0.0250255	0.0239533	0.0227917	0.0224662	0.0223626	0.0221762	0.0210989	0.0194654	0.0177694	0.0148377	0.0131177
70367554		0.00202505	0.00276626	0.00300311	0.00396815	0.00551623	0.00730266	0.00919576	0.0113072	0.0128025	0.0142282	0.0156222	0.0168719	0.0183722	0.0206614	0.0199151	0.0215467	0.0241816	0.0256345	0.0263557	0.0253677	0.0228502	0.0202188	0.0166479
70367624		0.00255098	0.00230371	0.00229865	0.00271653	0.00266745	0.00308068	0.00330636	0.00444861	0.00632883	0.00833043	0.00985265	0.0118283	0.0135698	0.015743	0.0183353	0.019247	0.0211073	0.0234117	0.0252708	0.025823	0.0248057	0.0250418	0.0248745	0.0264153	0.0273066	0.0277513	0.026254
70367791		0.00120603	0.00155593	0.00180937	0.00244457	0.00320614	0.00392124	0.00399329	0.00452027	0.00517621	0.00652139	0.00829978	0.0105309	0.0130764	0.0134104	0.0174376	0.0162864	0.0182442	0.0201513	0.0229933	0.0242589	0.0250174	0.0248586	0.0272662	0.0278231	0.0276492	0.0261653	0.0252158
70367861		0.00411309	0.00368795	0.00442823	0.00453079	0.00535542	0.00619074	0.00659667	0.00668249	0.00684336	0.00661805	0.00740618	0.00965053	0.0127255	0.0158551	0.0183613	0.0190237	0.0201887	0.0215362	0.0238028	0.0260391	0.0287591	0.0282906	0.0286703	0.0269551	0.025251
70368615		0.00421679	0.00323062	0.00241464	0.00221611	0.00327379	0.00421995	0.00458882	0.00442649	0.00387634	0.0032318	0.0036153	0.00578543	0.00900342	0.0121797	0.01294	0.015754	0.0185384	0.0220761	0.0241229	0.0246496	0.0255037	0.0251204	0.0247587	0.0237599	0.0226486	0.0214593
70369606		0.00381853	0.00509033	0.00784142	0.00770423	0.0104521	0.0126965	0.0108182	0.0130552	0.0125726	0.0141056	0.0154094	0.018003	0.0204893	0.0218488	0.021719	0.021463	0.0205183	0.0201786	0.0219277	0.0238262	0.0245068	0.0229492	0.0210239
70370387		0.0018913	0.00144277	0.00200728	0.00262672	0.00327299	0.00389648	0.00466998	0.006326	0.00890475	0.00875931	0.0110577	0.0129402	0.013695	0.0162886	0.0165532	0.0204063	0.0245342	0.0263949	0.029286	0.030297	0.0302056	0.0310402	0.030409	0.0295696	0.0286186	0.0281421	0.0266577	0.0256057
70370694		0.00323996	0.00278574	0.00282862	0.00368844	0.00497223	0.00674132	0.00625814	0.00705898	0.0069531	0.00658632	0.00644489	0.00659811	0.00693195	0.00748577	0.00856286	0.0101317	0.0124008	0.0174493	0.0189805	0.0206428	0.0239305	0.0266141	0.0265016	0.0272872	0.0302031	0.031685	0.0309186	0.0284885	0.027947	0.0232995
70371141		0.00349125	0.00324284	0.00318506	0.00294325	0.00270626	0.00256514	0.00308124	0.00424513	0.00572701	0.007308	0.0088544	0.0105194	0.0126315	0.0154503	0.0181565	0.021414	0.0237436	0.0246221	0.0248707	0.0264104	0.027856	0.0296904	0.0304852	0.0277986	0.0259913	0.0231982	0.0213655
70372509		0.00262665	0.00182873	0.00158723	0.00181006	0.00190982	0.00210887	0.00234411	0.0026435	0.00359731	0.00478364	0.00480153	0.00659414	0.00849595	0.00851984	0.010812	0.0131575	0.0155357	0.0187386	0.0222334	0.0251822	0.0273205	0.0280695	0.0271045	0.0251571	0.0225159	0.0228976	0.0237993
70372676		0.00482816	0.00391481	0.00307239	0.00269504	0.0026229	0.00177344	0.0021284	0.00286437	0.00425483	0.00642704	0.00872931	0.011291	0.0136103	0.0167243	0.0180577	0.0189765	0.0188057	0.0200353	0.0229447	0.0254619	0.0263355	0.0261827	0.0256431	0.0258575	0.024705	0.0230262	0.0207096	0.0183604
70373053		0.00303381	0.00310452	0.00348398	0.0043244	0.00474888	0.00477526	0.00461965	0.004022	0.00375976	0.00358566	0.00376491	0.00489176	0.0071396	0.0103065	0.012602	0.0148821	0.01706	0.0192642	0.0215393	0.023611	0.0249619	0.0249963	0.023286	0.0212995	0.0201082	0.0192189	0.0184147
70373667		0.000618377	0.00168041	0.00330818	0.00474905	0.00641759	0.00660372	0.00913507	0.0112362	0.0128637	0.0151808	0.0169136	0.0180459	0.0175192	0.0185318	0.0170345	0.0185419	0.0200236	0.0221424	0.0232547	0.0214095	0.0190545	0.0181085
70374114		0.00415043	0.00403553	0.00364375	0.00305704	0.00208323	0.00225499	0.00255481	0.00248157	0.00205677	0.0018647	0.00220449	0.00238064	0.00348203	0.00257077	0.00362884	0.00295994	0.00499059	0.00835171	0.0107417	0.0136944	0.0149274	0.0170158	0.0189006	0.0188267	0.0207168	0.0214984	0.0219649	0.023255	0.0249971	0.0272997
70374281		0.00577519	0.00692919	0.00685335	0.00778065	0.00673838	0.00749257	0.00822854	0.00812892	0.00883259	0.0099022	0.0103645	0.0130329	0.0150247	0.0177538	0.0159993	0.0172601	0.0181527	0.0193865	0.0212403	0.021323	0.0214079	0.0197748	0.0208442	0.0222754	0.0224893	0.0206342	0.0176969
70374351		0.00138032	0.00154165	0.00200053	0.0029305	0.00360447	0.00370527	0.00333231	0.00284025	0.00303644	0.00475892	0.00766073	0.0110842	0.0132605	0.0158302	0.0198442	0.0229196	0.0245091	0.0247933	0.0242195	0.0240924	0.0254967	0.0254785	0.0254057	0.0244522	0.0228635	0.0212789	0.0191887
70374588		0.00452336	0.00348888	0.00259058	0.00211814	0.00242654	0.00304881	0.00375306	0.00454418	0.00554269	0.00654228	0.00787597	0.00941224	0.0110486	0.0130894	0.0144682	0.0144146	0.0172384	0.0204927	0.022231	0.0225089	0.0226997	0.0219831	0.0209865	0.0200568	0.0194406	0.0193086	0.0193826	0.0193168	0.0190052
70374658		0.00472418	0.00437966	0.00381356	0.00363925	0.0038776	0.00428684	0.00607351	0.00876812	0.0114187	0.0132502	0.0145779	0.0157537	0.017406	0.0198404	0.0215364	0.0225233	0.0236674	0.0260775	0.0264467	0.0273291	0.0256148	0.0215262	0.0186551	0.0163349
70374895		0.00711771	0.00753046	0.00766903	0.00739307	0.00748967	0.00658371	0.00596227	0.0055838	0.00625399	0.00581748	0.006277	0.00944579	0.00816859	0.0105029	0.0143799	0.0162581	0.0167415	0.0187566	0.0209767	0.0226986	0.0236667	0.0234023	0.0231607	0.0239441	0.0230098	0.0230514	0.0223009	0.0198063
70375035		0.00402295	0.00477279	0.00541696	0.00586186	0.00637586	0.0076518	0.0094771	0.0103606	0.0113193	0.0126392	0.0140912	0.0154347	0.0164778	0.0170328	0.0182081	0.0205694	0.0221303	0.0238202	0.0235209	0.0262667	0.0289238	0.0302792	0.0306648	0.0288764	0.0252316	0.0221037
70375105		0.00616622	0.00574531	0.00544726	0.00464269	0.00366356	0.00362091	0.00533002	0.00832059	0.0121776	0.0166415	0.0211835	0.0245677	0.0257431	0.0249935	0.0235178	0.0219663	0.0218457	0.0218755	0.0224893	0.0225361	0.021569	0.0187997	0.015882	0.0132545
70375342		0.00102896	0.0009958	0.00103741	0.00184245	0.00280039	0.00365928	0.00566595	0.00628732	0.00660916	0.00693569	0.0078456	0.00765392	0.0114328	0.0122469	0.0133227	0.0153984	0.0174324	0.0173123	0.017065	0.0173765	0.0188905	0.0204611	0.021742	0.0218069	0.0223271	0.0217084	0.0200721	0.01775	0.0161737
70376877		0.00382989	0.00427643	0.00481274	0.00615614	0.00799032	0.00953902	0.0107656	0.0113629	0.0115994	0.0141895	0.0169604	0.0203891	0.0237063	0.0265622	0.0289118	0.0289243	0.0285399	0.0265484	0.025854	0.0243693	0.0224291	0.0196209	0.0164368	0.0136343
70377938		0.00254157	0.00348522	0.00399083	0.00382801	0.00359411	0.0047828	0.00723179	0.00551489	0.0078199	0.0102139	0.0105784	0.0138734	0.0256779	0.0328534	0.0311778	0.0241538	0.0178	0.0188941	0.0239633	0.0269357	0.0281448	0.0285842	0.0285798	0.0269819	0.0264663
70378008		0.00751535	0.00884961	0.0109894	0.0127673	0.0125592	0.0144653	0.0181765	0.0211733	0.0222338	0.0213317	0.0204952	0.0192482	0.0193184	0.0183779	0.020503	0.0210234	0.020938	0.0200343	0.0188689	0.0182971	0.0181946	0.018122	0.0186447	0.0176654
70378245		0.00193084	0.00214333	0.00234322	0.00257886	0.00272552	0.00282638	0.00323512	0.00428391	0.00607728	0.00829519	0.0105858	0.0128074	0.0150245	0.0175139	0.0203379	0.0231135	0.0252447	0.0256382	0.0242657	0.0251822	0.0256288	0.0265418	0.0279832	0.0288908	0.0289233	0.0285545	0.0277076	0.0271308	0.025805
70378552		0.00303463	0.00358108	0.00463925	0.00633295	0.00653365	0.00749483	0.00696341	0.00920522	0.0105817	0.0120698	0.0130278	0.0141304	0.0176714	0.021878	0.0267429	0.030565	0.0313235	0.0317138	0.0306008	0.0284686	0.0258011	0.0232704	0.0208296
70378622		0.00238785	0.00290512	0.00313796	0.00352461	0.00395858	0.00461153	0.0051639	0.00483334	0.00385176	0.00282025	0.00245779	0.00206489	0.00191697	0.00208503	0.0028219	0.00441887	0.00780154	0.0118785	0.0157265	0.0194217	0.0212835	0.02159	0.0213411	0.0207206	0.0227834	0.0246297	0.0272148	0.0287858
70378789		0.0031024	0.00343475	0.00360602	0.00347969	0.00390173	0.0043073	0.00499402	0.0060698	0.00714914	0.00831164	0.00951783	0.0109527	0.0126204	0.0132484	0.0145736	0.0155346	0.0161292	0.017187	0.0179329	0.0184424	0.0195324	0.0201446	0.0209063	0.0212326	0.022235
70380464		0.0033318	0.00285271	0.00232013	0.00192504	0.00199806	0.00226606	0.00309425	0.00397431	0.0045882	0.0050346	0.00564888	0.00772429	0.0106887	0.0127338	0.0158183	0.0181398	0.0175583	0.0193661	0.0212452	0.0224711	0.0234671	0.0241799	0.0236375	0.0222865	0.0201469	0.0181501	0.0171435	0.0167868	0.0141749	0.0121869
70380771		0.000725394	0.000549037	0.000997101	0.00138603	0.00207922	0.00290873	0.0036976	0.00451525	0.00538616	0.00638505	0.00679023	0.00733681	0.00810016	0.00917176	0.0106314	0.0126099	0.0144221	0.0162406	0.0186987	0.019441	0.0207674	0.0222275	0.0240911	0.0263175	0.0272929	0.0280857	0.0285785	0.0258413	0.0254642
70381078		0.0137909	0.0125134	0.010236	0.0071256	0.00319973	0.00199374	0.00701784	0.0118625	0.0153558	0.0165907	0.0157527	0.015632	0.0164737	0.0173766	0.0195384	0.0235128	0.0260582	0.02674	0.0271018	0.0279863	0.0284766	0.0291487	0.0285596	0.0261259
70381148		0.00494406	0.00532404	0.0058563	0.00570433	0.00496723	0.00407928	0.00338865	0.00372083	0.00483132	0.00672242	0.0102547	0.0140886	0.0169114	0.01813	0.0177523	0.0171984	0.0173168	0.0181462	0.0199831	0.0219855	0.0227773	0.02303	0.0239154	0.0228307	0.0223259	0.0206962
70382139		0.00797173	0.00703913	0.00837323	0.00955309	0.00959754	0.0107967	0.0121379	0.0135175	0.015256	0.0173258	0.0185641	0.0189244	0.0186901	0.0180225	0.0172225	0.0190323	0.0200226	0.0209421	0.0205624	0.0204349	0.0204082	0.0201885	0.0189804	0.0175677	0.0152809	0.0152993	0.0148509	0.0148435
70385112		0.00534521	0.00545466	0.00542512	0.00498068	0.00442193	0.00409709	0.00432264	0.00516798	0.00653921	0.0081073	0.0100753	0.0143943	0.016929	0.0192595	0.020692	0.0216489	0.0230152	0.0236066	0.0252955	0.0249128	0.0247583	0.0236357	0.023741	0.0247127	0.0255484	0.0262937	0.0263925	0.0247672
70385419		0.00360929	0.00338494	0.00320528	0.00335763	0.00326281	0.00317046	0.00331467	0.00351337	0.00368691	0.00387401	0.00452642	0.00561072	0.00819106	0.010327	0.0124818	0.0153639	0.0148021	0.0165072	0.0182409	0.0193891	0.0201975	0.0208021	0.0212903	0.0218211	0.0242115	0.0254153	0.0267218	0.0270374	0.0253346	0.0232418
70386410		0.00326675	0.00252999	0.00150202	0.00102043	0.00123527	0.000855678	0.000682547	0.000828043	0.00119576	0.00110746	0.00162593	0.00231235	0.0030145	0.00367607	0.00463176	0.00618358	0.00768891	0.00887053	0.0128607	0.0157136	0.0180328	0.0200124	0.0217776	0.0232938	0.0237402	0.0243347	0.0229558	0.0215253	0.0211083	0.0197878
70386717		0.00303945	0.00290122	0.00243758	0.00253874	0.0021449	0.00234543	0.00403597	0.00462281	0.00672388	0.00923413	0.0118696	0.0163279	0.0213463	0.0252846	0.0297789	0.0328692	0.0324082	0.0306858	0.0285759	0.0270314	0.0249632	0.0230505	0.0196358	0.0164196
70386884		0.00183656	0.00261975	0.00342955	0.00412331	0.00528333	0.00605494	0.0069578	0.0085792	0.0111642	0.0153542	0.0170388	0.0185515	0.0208066	0.0222587	0.0234709	0.0241813	0.0248644	0.0256884	0.0276989	0.0282517	0.0272177	0.0242758	0.0226414	0.0213347	0.0193116	0.0181334	0.0173424	0.0170509	0.0154287
70387261		0.00432715	0.0039687	0.00348689	0.00307284	0.00274761	0.00303797	0.00275188	0.0025852	0.00249723	0.00233954	0.00217959	0.00274049	0.00446944	0.00606758	0.0061069	0.00667745	0.00704554	0.00791707	0.00868809	0.010024	0.0126868	0.0157075	0.0181124	0.0200006	0.0204974	0.0198258	0.0192017	0.02145	0.020219	0.0222651
70387331		0.00191274	0.00362146	0.00653216	0.0104334	0.0124716	0.0115924	0.015478	0.0158231	0.0157095	0.0186391	0.0200329	0.0224153	0.0263069	0.030332	0.0319881	0.0323912	0.0325457	0.0298274	0.0284757	0.0269641	0.0248585	0.0234284	0.0202748	0.0166654	0.0146955
70387708		0.00398849	0.00438654	0.00491746	0.00566302	0.00646494	0.0076279	0.00751637	0.00849954	0.00937175	0.0103537	0.0115993	0.012387	0.0128057	0.0133347	0.0144606	0.0148457	0.0154224	0.0163318	0.0165395	0.0170752	0.0175183	0.0188816	0.0200292	0.0232367	0.023611	0.0219512	0.0206895	0.0214512
70388252		0.00607659	0.0066571	0.00803954	0.00965872	0.0110954	0.0124345	0.0130591	0.0141952	0.0151488	0.0170122	0.0186956	0.0189537	0.0182026	0.017874	0.0194974	0.0215975	0.0241675	0.0260473	0.0264161	0.0258271	0.0250197	0.0238434	0.0232803	0.023164	0.0224057	0.0200884	0.0193352	0.0160645
70388559		0.00520578	0.00481709	0.00460801	0.00451723	0.00454611	0.00553852	0.00542037	0.00520572	0.00396384	0.00234478	0.00231141	0.000679659	0.000689401	0.00210867	0.00436666	0.00839928	0.00863633	0.0135667	0.0174688	0.0197101	0.0208182	0.0210907	0.0242733	0.0264933	0.028594	0.0294495	0.0305666	0.0297624	0.0287508	0.026007
70388796		0.00377744	0.00367243	0.00348403	0.00333146	0.00317426	0.00310436	0.00317254	0.0033535	0.00311738	0.00332299	0.00405276	0.00553959	0.00740612	0.0100473	0.0127315	0.0125102	0.0138709	0.0148207	0.0159181	0.0168317	0.0180341	0.0199561	0.0203477	0.0235072	0.026658	0.0282152	0.0273176	0.0264045	0.0255738
70389006		0.00450825	0.00345904	0.00274875	0.00233062	0.0021789	0.00307659	0.00432712	0.00517688	0.00662754	0.00554668	0.00734992	0.00683993	0.00749791	0.00755337	0.00709609	0.00830568	0.00919026	0.0102141	0.0111217	0.0120635	0.0150973	0.0178429	0.0199265	0.02138	0.0215015	0.0210475
70389313		0.00289938	0.00274709	0.00263897	0.00267518	0.00257475	0.00267144	0.00215668	0.00292739	0.00445079	0.00635065	0.00842512	0.00970003	0.0117408	0.0159411	0.0193098	0.0216189	0.0235117	0.0246316	0.025351	0.0256669	0.0241894	0.0244997	0.0223874	0.0194104	0.0180219	0.0166136	0.0162588	0.0155725	0.0147442	0.0141972
70389927		0.00540514	0.00655419	0.00655601	0.00658946	0.00800482	0.0100097	0.0123406	0.0151139	0.0184459	0.0215132	0.0236344	0.0250174	0.0248526	0.0246516	0.0240861	0.0250225	0.0271648	0.0270221	0.0281949	0.0257742	0.0229907	0.018572	0.015977	0.0142548	0.0131915	0.0123305	0.0110524
70390304		0.00434264	0.00417777	0.00413555	0.00374097	0.00324473	0.0029198	0.00271169	0.00255133	0.00254539	0.00253658	0.00246764	0.00286663	0.00336657	0.00399262	0.00470844	0.005544	0.00654159	0.0082126	0.0107072	0.00912144	0.0116396	0.0138272	0.0154424	0.0176797	0.0182556	0.0197579	0.0202657	0.0213049	0.0223018	0.0247044
70391602		0.00418726	0.00387011	0.00355389	0.00210832	0.00157663	0.00275419	0.00447498	0.00661832	0.00870549	0.0102752	0.0120522	0.0140534	0.0151038	0.0168342	0.0192157	0.0223774	0.0251766	0.0263947	0.0291479	0.0296051	0.029455	0.0296904	0.0287693
70391769		0.00210205	0.00203725	0.00316484	0.00341819	0.00345113	0.00290768	0.00233106	0.00268325	0.00369386	0.00516242	0.00709897	0.00886969	0.010197	0.011305	0.0129109	0.0152769	0.0162113	0.0189007	0.0212086	0.0230446	0.0239276	0.0242147	0.0242042	0.0241584	0.0235851	0.0224858	0.0208465	0.0198394
70391839		0.00430908	0.00407269	0.00381441	0.00374978	0.00395805	0.00423164	0.00434649	0.00400999	0.00389236	0.00392683	0.00409491	0.00449248	0.00515768	0.00589131	0.00732128	0.00885208	0.0107438	0.0128839	0.0149397	0.0167087	0.0184824	0.0199267	0.0203759	0.0206867	0.0217536	0.0217021	0.0237168	0.0256774	0.0266543	0.0268029
70392997		0.00289959	0.00336802	0.00423487	0.00572345	0.00800908	0.0111282	0.0142615	0.016995	0.0184392	0.0191604	0.0196384	0.0208624	0.0221829	0.0234715	0.0237716	0.0234685	0.02331	0.022027	0.0210139	0.0204458
70393514		0.0056504	0.0052361	0.00507355	0.00495397	0.00491827	0.00506787	0.00538761	0.00668875	0.00734745	0.00784145	0.00847932	0.00912204	0.0113661	0.011272	0.0120035	0.0138959	0.0158655	0.0168505	0.0177433	0.0182405	0.0184757	0.0185304	0.0187536	0.0185882	0.0188376	0.0191373	0.0198167	0.0204318	0.0207148	0.0202773
70394295		0.00146162	0.00132732	0.00168638	0.00250708	0.00378968	0.00562047	0.00823511	0.0108834	0.0119304	0.0132026	0.0164296	0.0186665	0.0195298	0.0191066	0.0173553	0.0159399	0.01495	0.0145123	0.0147753	0.0162591	0.01759	0.0190204	0.0205683
70394672		0.00404124	0.00547034	0.00757127	0.00930069	0.0101957	0.011469	0.0127843	0.0135707	0.0151242	0.0162652	0.0174256	0.0185056	0.0202684	0.0207781	0.0219545	0.0237936	0.0242724	0.0251856	0.0239028	0.0222696	0.0212825	0.020542	0.0203472	0.0195892	0.0182451	0.0164645
70394742		0.00139769	0.00153061	0.00185652	0.0033052	0.00420549	0.00518594	0.00596311	0.00794468	0.0101418	0.0124977	0.0151442	0.0176336	0.02006	0.0224026	0.0236732	0.0244487	0.0256519	0.0249299	0.0241877	0.0211977	0.0200196	0.0189036	0.0193827	0.019584	0.020486	0.0200831	0.0181827
70395593		0.00133641	0.00239804	0.00291376	0.00310882	0.00498123	0.00599122	0.00669107	0.00724642	0.00815176	0.00963994	0.0100283	0.0112676	0.0125885	0.0139408	0.015847	0.018134	0.0199684	0.0213952	0.0234056	0.0241825	0.02483	0.0230183	0.0218217	0.0209903	0.0197461	0.018903	0.0184064	0.0179821	0.0165243
70395733		0.00343602	0.00262392	0.00346884	0.00513917	0.00514389	0.00677851	0.00863507	0.0101929	0.0127744	0.0167989	0.0215673	0.0263054	0.0297861	0.0310537	0.029979	0.0286345	0.0281925	0.027059	0.02817	0.0284446	0.0279844	0.0257169	0.0232091	0.0204697	0.0185002
70395970		0.00469537	0.00506753	0.00529511	0.00617778	0.00763966	0.00887635	0.0110129	0.0142167	0.0168343	0.0186008	0.0196184	0.0201398	0.0200111	0.019839	0.0203452	0.0210736	0.0228342	0.025018	0.0248424	0.0250676	0.022203	0.0211399	0.0199012	0.0176466	0.0167877
70396654		0.00134914	0.000631749	0.000728542	0.00196728	0.00252611	0.00257096	0.00218984	0.00217202	0.00247065	0.00285299	0.00292629	0.00340027	0.00312842	0.00437002	0.00666959	0.00856712	0.00977964	0.0105571	0.0114411	0.0133004	0.0143699	0.0165077	0.0197756	0.0230311	0.024473	0.0239391	0.0215242	0.0197015	0.0190237	0.0177543
70397882		0.00684669	0.00659996	0.00657544	0.00655445	0.00650686	0.00576063	0.00609279	0.00592397	0.00617786	0.00506066	0.00608086	0.00735485	0.0101017	0.0135494	0.0175044	0.0197373	0.0204129	0.0203404	0.0223537	0.0245259	0.0253151	0.0269073	0.0282435	0.0274525	0.0268098	0.0253595	0.0253409	0.0238613
70397952		0.00389782	0.00445678	0.00507329	0.00554777	0.00582937	0.00617892	0.00732072	0.00953482	0.012844	0.0157879	0.0183204	0.0201516	0.0212692	0.0221363	0.022163	0.0218403	0.0214572	0.021616	0.0213017	0.0207797	0.0205088	0.0202162	0.0197764	0.0200874	0.0204498	0.0195001	0.0201142
70398259		0.00400274	0.00472528	0.00567569	0.00710266	0.00884964	0.0110079	0.00984583	0.010982	0.0141439	0.0133514	0.0143547	0.0163403	0.0183139	0.0213091	0.0234788	0.0255205	0.0274413	0.0295172	0.0307889	0.0293289	0.0276391	0.0249494
70398329		0.00283186	0.00307564	0.00314524	0.00290175	0.00236395	0.00213409	0.0022078	0.00282212	0.00433399	0.00568314	0.00642846	0.00911239	0.0122326	0.0153496	0.0181573	0.019033	0.0192445	0.0194173	0.0195578	0.0197215	0.0213018	0.0226055	0.0234777	0.0252367	0.0273121	0.0289092
70398943		0.00225777	0.00116412	0.000331539	0.000811601	0.00121539	0.00198675	0.00283546	0.003604	0.00414219	0.00318698	0.00449255	0.00616452	0.00798577	0.00984006	0.0110532	0.0119864	0.014144	0.0165785	0.0187217	0.0196129	0.0183429	0.0149479	0.0127418	0.0120276	0.01106	0.0116453	0.0138276	0.0168757	0.0198494	0.0219142
70399180		0.00655101	0.00811936	0.00982943	0.012017	0.014577	0.0168328	0.0187373	0.0197114	0.0203208	0.0200172	0.0204548	0.0214572	0.0219516	0.0235545	0.0256019	0.0280299	0.0267521	0.0259955	0.0228595	0.0209438	0.0183303	0.0168562	0.0155837	0.0143955	0.0124039
70399320		0.00317559	0.00345159	0.0038438	0.0041658	0.0042567	0.00402631	0.00412777	0.00556048	0.00770838	0.0115164	0.0148295	0.0125264	0.0142216	0.0151273	0.0160947	0.0165501	0.016632	0.0165812	0.0167569	0.0187006	0.0212815	0.0240287	0.0256208	0.0280556	0.0270227	0.0280617	0.0281705	0.0255819
70400171		0.00462739	0.00419279	0.0042678	0.00418749	0.00399531	0.00365607	0.0031846	0.00353258	0.00332192	0.00282229	0.00282183	0.00255598	0.0034021	0.00428155	0.00579219	0.00577717	0.00742902	0.0098958	0.0103362	0.0122854	0.0131769	0.0180318	0.0207167	0.0234418	0.0259277	0.0278702	0.0286846	0.0280888	0.0268993	0.0254335
70400618		0.00292477	0.00330296	0.00330514	0.00349318	0.00346791	0.00485465	0.00676152	0.00824424	0.00977618	0.0119904	0.0135521	0.0149139	0.0152459	0.0144717	0.0138963	0.0150188	0.017344	0.0198149	0.0212382	0.0234722	0.0231463	0.0257679	0.0259507	0.0266212	0.0253379	0.0240891
70401092		0.00248465	0.00274882	0.00285587	0.00266872	0.00204871	0.00110054	0.00225037	0.00307588	0.00577654	0.0093234	0.0124896	0.015573	0.0188015	0.0217459	0.0236933	0.0242029	0.0232697	0.0217682	0.0197737	0.0189032	0.0191202	0.017976	0.0180548	0.0177518	0.0169955
70401232		0.00552402	0.00569353	0.00559915	0.00504637	0.00465817	0.00425571	0.00388607	0.00383291	0.00511372	0.00560817	0.00658049	0.00784324	0.00856333	0.0125081	0.0153874	0.0185146	0.0206172	0.0200926	0.0216593	0.0213728	0.0210375	0.0212715	0.0217257	0.0226405	0.0224391	0.0226401	0.0230407
70401469		0.00324405	0.00282248	0.0027039	0.00242631	0.00256329	0.00301222	0.00433232	0.00480275	0.00653225	0.00877516	0.0113441	0.0143445	0.0175866	0.0182055	0.0202641	0.0199261	0.0212573	0.0222782	0.0225364	0.0225511	0.0225609	0.0220508	0.0211286	0.0200123	0.0187752	0.018459	0.0161462	0.0144963
70402460		0.00490755	0.00491167	0.00440131	0.00425578	0.0047637	0.00580624	0.00736824	0.00924061	0.0116607	0.0112287	0.0132969	0.0148607	0.0153856	0.0165066	0.01721	0.0172857	0.0182051	0.0182203	0.0178455	0.0182697	0.0180266	0.0177457	0.0171537	0.0163646	0.0154681	0.0150329	0.0141051	0.0124177
70402767		0.00145279	0.000410762	0.00169404	0.00350366	0.00365587	0.0061184	0.00739775	0.00761338	0.00974356	0.0120319	0.0133133	0.0144299	0.0165224	0.019664	0.0220738	0.0249635	0.0295899	0.0299277	0.0286125	0.0258185	0.0257086	0.0228463	0.019159	0.0159761
70403995		0.00233121	0.0025356	0.00306804	0.00407107	0.00522031	0.00615292	0.00681146	0.00739691	0.00870629	0.00996738	0.0112063	0.0133176	0.0151713	0.016691	0.0175123	0.0184477	0.0188851	0.0188807	0.0187205	0.0179527	0.0162211	0.0165071	0.0165354	0.0160866	0.0150876	0.0133042	0.010992
70404442		0.00152228	0.0016768	0.00307542	0.00370663	0.00364684	0.00372713	0.00410428	0.00453131	0.00484671	0.00504243	0.00619707	0.0098959	0.0139134	0.0178737	0.0215081	0.0250249	0.0272865	0.028334	0.0290815	0.0274316	0.0299609	0.0284976	0.0299954	0.0292604	0.0267103
70405433		0.00216904	0.00146347	0.00288796	0.00402213	0.00473871	0.00660871	0.00954573	0.0090051	0.0111678	0.013149	0.0152214	0.0182887	0.0176615	0.018107	0.0200211	0.0209831	0.0192813	0.0177842	0.0128407	0.0101373	0.00778775	0.0070056	0.00805227	0.00805462	0.00845984
70405503		0.00119703	0.000802177	0.000674529	0.000973173	0.00113953	0.00142495	0.00173196	0.00200668	0.0027795	0.00299872	0.00357869	0.00413225	0.00450633	0.00449395	0.00500036	0.00588962	0.00732275	0.00926585	0.0124156	0.0170041	0.0214832	0.0253516	0.0276269	0.0271836	0.0253734	0.0245309	0.0249249	0.025348	0.0248158	0.0240954
70405740		0.00335746	0.00345998	0.00351344	0.00322023	0.00294376	0.00280111	0.00312209	0.00379409	0.00512312	0.00460373	0.00597237	0.00769522	0.00710058	0.00814589	0.00674391	0.00871393	0.011254	0.0133517	0.0164794	0.017699	0.0218754	0.0197891	0.0210251	0.0225167	0.0237738	0.0246888	0.0256105	0.0259655	0.0252631	0.0252769
70406047		0.00570602	0.0057849	0.0059911	0.00669718	0.00826136	0.0104668	0.0127537	0.0144692	0.015077	0.0147425	0.0144922	0.0175059	0.0212981	0.0256447	0.0283966	0.0293647	0.0286619	0.0263453	0.0232536	0.020348	0.0185248	0.0174055
70406354		0.00330804	0.00382605	0.00421	0.00443339	0.00454406	0.00473344	0.0039046	0.00528917	0.00796448	0.0107929	0.0134547	0.0157387	0.0175554	0.0214359	0.0224407	0.0235302	0.0252296	0.025244	0.0251186	0.0261843	0.0264292	0.0281179	0.0268359	0.0254908	0.0240797	0.0209376
70406424		0.00505411	0.00462394	0.0043242	0.00468005	0.00553816	0.0068254	0.00909166	0.0117477	0.0135139	0.0141069	0.0134233	0.0121584	0.00889684	0.0118989	0.0083934	0.00949199	0.00591554	0.00516154	0.00566225	0.0050042	0.00505771	0.00435027	0.0054261	0.00847468	0.0169232	0.0194409	0.0229183	0.0271177	0.0268619	0.0252444
70406731		0.00431907	0.0031618	0.00158154	0.00182363	0.00122165	0.00122178	0.00120549	0.00151838	0.00190402	0.00236767	0.00296932	0.00406993	0.00628857	0.00857938	0.0111185	0.0131255	0.014297	0.0151879	0.0165474	0.0180688	0.0192367	0.0195668	0.0187475	0.0182914	0.0185074	0.0180317	0.0196718	0.020353	0.0201819
70407108		0.0017163	0.00149662	0.00135925	0.00112744	0.00153758	0.00211883	0.00236593	0.00217209	0.00173496	0.00164706	0.00203122	0.00310459	0.00475317	0.00667427	0.00965699	0.00751342	0.00965722	0.0116976	0.0146113	0.0142923	0.0165581	0.0171076	0.017846	0.0194222	0.0220114	0.0250587	0.0267531	0.0270792	0.0271821	0.0268125
70407275		0.00161668	0.00120625	0.000945661	0.00147924	0.00244337	0.0033744	0.00433593	0.00550236	0.00678737	0.00791017	0.00883857	0.0116162	0.0132547	0.013861	0.0134568	0.0146927	0.0174467	0.0228132	0.0264679	0.0274462	0.0259895	0.0254862	0.0255169	0.0249065	0.0257561
70407959		0.00260093	0.00326667	0.00377952	0.00411973	0.0042848	0.00434999	0.00460229	0.00479152	0.00409712	0.00497068	0.00602971	0.00794608	0.00804669	0.0101569	0.0127732	0.0129484	0.0162489	0.0185487	0.0196055	0.0200065	0.0202823	0.0205397	0.0210927	0.0217099	0.0217011	0.0224306	0.0231974	0.0243662	0.0247938
70408573		0.00175646	0.00203886	0.00263455	0.00332317	0.00402441	0.00468086	0.00544868	0.00832996	0.0119875	0.0159045	0.017053	0.0186929	0.0230346	0.0259876	0.0284218	0.0281367	0.0257407	0.0245257	0.0234465	0.0218249
70408643		0.00324017	0.00411266	0.00401439	0.00446308	0.00538187	0.00558567	0.00637515	0.00771679	0.00948744	0.0114923	0.0133182	0.0143587	0.0147818	0.0154594	0.0164339	0.0177385	0.0181179	0.0177877	0.0170494	0.016101	0.01726	0.0195109	0.0177694	0.0205667	0.0235961	0.0246632	0.0249152	0.0246468	0.0227054	0.0201653
70408880		0.00295277	0.00243766	0.00189553	0.00150179	0.00131147	0.00131045	0.00142773	0.00160456	0.00126761	0.000837863	0.00273718	0.00587707	0.0101614	0.0119682	0.0177029	0.0235889	0.0286746	0.0321162	0.0316305	0.0323917	0.0300374	0.0273135	0.0225353	0.019199	0.0180554	0.0188062	0.0207616	0.0213317	0.0211107
70409020		0.0052541	0.00523843	0.00549356	0.00613401	0.00740054	0.00782937	0.0102683	0.0131234	0.0157692	0.0182982	0.0194542	0.0194359	0.0175718	0.0176807	0.016435	0.01851	0.02003	0.0222886	0.022759	0.0216068	0.0208992	0.0206057	0.0212658	0.0215952	0.0208034
70409187		0.0025849	0.00297037	0.003286	0.00359267	0.00426416	0.00541998	0.00736843	0.00925057	0.0107982	0.0118228	0.0122137	0.010812	0.0122327	0.0132655	0.0153475	0.016926	0.0184626	0.019548	0.0204955	0.0217515	0.0215527	0.0211169	0.0198089	0.0183019	0.0175666	0.0178247	0.0161956	0.0157998
70409257		0.00260093	0.00326667	0.00377952	0.00411973	0.0042848	0.00434999	0.00460229	0.00479152	0.00409712	0.00497068	0.00602971	0.00794608	0.00804669	0.0101569	0.0127732	0.0129484	0.0162489	0.0185487	0.0196055	0.0200065	0.0202823	0.0205397	0.0210927	0.0217099	0.0217011	0.0224306	0.0231974	0.0243662	0.0247938
70409564		0.000703675	0.000962138	0.00174897	0.00265135	0.00331912	0.00355466	0.00474618	0.00494	0.00747634	0.0109694	0.0149408	0.0187272	0.0220048	0.0245361	0.0256775	0.0256058	0.0251257	0.0238046	0.0219107	0.0209023	0.0191848	0.0197974	0.0203294	0.0211956	0.0212406
70409634		0.00330177	0.00243465	0.00182243	0.0019109	0.00268459	0.00352746	0.00436387	0.00538284	0.00704302	0.00839087	0.00999611	0.0123795	0.0138443	0.0169207	0.0193041	0.0202828	0.0224172	0.0248289	0.0282989	0.0289644	0.0310075	0.0299385	0.0274297	0.0248524	0.0217538	0.0203627
70410011		0.00382479	0.0035979	0.00316304	0.00302625	0.00299296	0.00297666	0.00272175	0.00222075	0.00242825	0.00312493	0.00368277	0.00476033	0.0064335	0.0085274	0.0109091	0.013702	0.0171285	0.0210884	0.0249076	0.0260049	0.0277079	0.027238	0.0270699	0.0264171
70410178		0.00722337	0.00798802	0.00813801	0.00785416	0.00732422	0.00673786	0.00514288	0.0033476	0.00230187	0.00372632	0.00621546	0.0089034	0.0135264	0.0160471	0.0182573	0.019988	0.0208599	0.0210432	0.0217892	0.0219804	0.0216945	0.0225508	0.0228664	0.0229758	0.0237823	0.0247904	0.0251562	0.0242961	0.0237832	0.023614
70410625		0.00273826	0.0033683	0.00402715	0.00462837	0.00493255	0.00527836	0.00561686	0.00642084	0.00737814	0.00852088	0.0126897	0.0142008	0.0152141	0.015495	0.015924	0.0176646	0.0188895	0.0203113	0.0229322	0.0240115	0.0241015	0.0242452	0.0250767	0.0259125	0.0258663	0.0252648
70411309		0.00388571	0.00421031	0.00471527	0.00495042	0.00469364	0.00451894	0.00524687	0.00500313	0.00456423	0.00440038	0.00556585	0.00710242	0.0094032	0.0119363	0.0135204	0.0145279	0.0154147	0.0179071	0.0213071	0.0238257	0.0248054	0.0245259	0.0220343	0.0198706	0.0183965	0.0174928
70411546		0.00356322	0.00335378	0.00341556	0.00345688	0.00331286	0.00298774	0.00281237	0.00267649	0.002868	0.00308553	0.00315001	0.00289488	0.00225907	0.00164984	0.0028769	0.00529648	0.00808527	0.0105291	0.0122699	0.0132583	0.0136753	0.0151502	0.0146816	0.015275	0.0168034	0.0185697	0.0196052	0.0213476	0.0251572	0.02768
70411616		0.00622946	0.00415593	0.00254303	0.00192211	0.00212499	0.0027533	0.00389546	0.0054683	0.00737361	0.00972577	0.0123576	0.0146439	0.0164764	0.0181581	0.0199499	0.0207577	0.0220541	0.0215962	0.0200028	0.018294	0.0207469	0.0222795	0.0226513	0.0229087	0.0227646	0.0224267	0.0224238	0.0214721	0.0197023	0.0182326
70411783		0.00160182	0.000868708	0.000890983	0.00145024	0.00191125	0.0022264	0.00293799	0.00330744	0.00439838	0.00512144	0.0055489	0.00520196	0.00431609	0.00376584	0.00376281	0.00451942	0.00618908	0.00893096	0.0114998	0.0122733	0.0133559	0.0146479	0.015872	0.0167556	0.017402	0.0171426	0.017299	0.017003	0.0165303	0.0166647
70412774		0.00474492	0.00513644	0.005687	0.0061987	0.00664989	0.00707059	0.00739134	0.00738839	0.00679375	0.00546866	0.00387245	0.00214414	0.00398365	0.00792061	0.012777	0.0179441	0.0228007	0.0267831	0.0287545	0.0270152	0.0240413	0.0205494	0.0202559	0.0197224	0.0215413	0.0245486
70413695		0.00394896	0.00393801	0.00404495	0.00432638	0.00322362	0.00396044	0.00503501	0.00586393	0.00781991	0.00899871	0.0109485	0.0128939	0.0148633	0.0161636	0.0188113	0.0196294	0.0198453	0.0199152	0.0181523	0.0182582	0.0177537	0.0187238	0.0205626	0.0226161	0.0238474	0.0243665	0.0225163	0.020605	0.0182567
70414756		0.00277019	0.00262706	0.00239925	0.00241681	0.00263607	0.00296226	0.0035063	0.00355172	0.00461428	0.00589378	0.00652755	0.0071386	0.00846928	0.0103172	0.011921	0.0128219	0.013156	0.0132667	0.0139082	0.0152899	0.0159266	0.017516	0.0172488	0.0183523	0.0201061	0.0211424	0.02199
70414993		0.00324359	0.00316283	0.00269183	0.00230014	0.0019264	0.00188438	0.00233225	0.00276759	0.00359869	0.00402155	0.00432721	0.00452789	0.00412287	0.00308444	0.00275629	0.0033085	0.00478725	0.00651231	0.00818569	0.0100623	0.0111793	0.012173	0.0130611	0.0138417	0.0144404	0.0148056	0.0151845	0.0164315	0.0175389	0.0186852
70415133		0.00475339	0.00502543	0.00544667	0.00569325	0.00598193	0.00641481	0.0079041	0.0110534	0.0158909	0.0211003	0.0253494	0.0279295	0.0284913	0.0265733	0.0255717	0.0230156	0.023424	0.0215273	0.0227339	0.0204331	0.0193405	0.0186854	0.0189649	0.0188584	0.0188046	0.0179955	0.0173144
70415203		0.00327772	0.0035003	0.00278931	0.00316992	0.00338998	0.00316338	0.00448567	0.00628069	0.00765583	0.0088143	0.0105202	0.012525	0.0148767	0.016195	0.0186234	0.0198094	0.0235021	0.0237895	0.0248094	0.024107	0.0228542	0.0205765	0.0189857	0.0179227	0.0176463	0.0174477	0.017468
70415817		0.00312989	0.00375109	0.00428558	0.0048243	0.00527209	0.00603459	0.00693208	0.00802004	0.00954337	0.0120815	0.0143597	0.0166565	0.0170019	0.0207022	0.0244677	0.0275479	0.0293123	0.0290949	0.0271491	0.0267836	0.022811	0.0193171	0.0196379	0.0209947	0.0207902
70416668		0.00301809	0.00276111	0.00282322	0.00302703	0.00317481	0.0030631	0.00251513	0.00191868	0.00210535	0.00262823	0.00350881	0.00451007	0.00559207	0.00727911	0.00875221	0.0116713	0.0137662	0.0144638	0.0161091	0.0183159	0.0239936	0.0268601	0.029594	0.0293789	0.0282853	0.0271751
70416738		0.00239044	0.00268054	0.00286265	0.00291373	0.00287291	0.00300619	0.00372059	0.00522154	0.00722598	0.00966055	0.0118579	0.0135464	0.0142662	0.0145999	0.0164908	0.0154924	0.0181278	0.0206051	0.0215443	0.022396	0.0231685	0.0245586	0.0248874	0.0265666
70417589		0.00430257	0.00409873	0.00393082	0.00386386	0.00375992	0.00343967	0.00287677	0.00267524	0.00261404	0.00257008	0.00246975	0.00317848	0.0049626	0.00714855	0.00930148	0.0114078	0.0137409	0.0167877	0.0188658	0.0191671	0.0180428	0.0175173	0.0198635	0.0226697	0.0238446	0.0232307	0.0214417	0.0204571	0.020669	0.0209425
70418273		0.00522121	0.00407621	0.00273735	0.00134323	0.00116268	0.00104696	0.00223078	0.00318659	0.00408105	0.00577654	0.00844759	0.0122351	0.0170975	0.0222982	0.026921	0.0307305	0.0313757	0.0327402	0.0326614	0.0319852	0.028898	0.0266337	0.025608	0.0257488
70418720		0.00194626	0.00249558	0.00282774	0.0028396	0.00271936	0.0026448	0.00284079	0.00336103	0.00408946	0.00512315	0.00629801	0.00789539	0.00986507	0.0120661	0.0153908	0.017686	0.0196267	0.0206523	0.0209428	0.0224945	0.0215289	0.0223735	0.0220307	0.0221371	0.0228759	0.0224764	0.023082	0.0221493	0.0201955	0.018309
70419194		0.00493444	0.00495119	0.00441824	0.00409995	0.00184213	0.00203566	0.00193829	0.00260956	0.00461807	0.0088144	0.00978939	0.0137372	0.0161902	0.0173547	0.0187443	0.0191473	0.0209524	0.0192884	0.0200141	0.0192788	0.0190999	0.0219631	0.0217102	0.0214534	0.022151	0.0223249	0.0216078	0.0213579	0.0212706	0.0200736
70420185		0.00166914	0.00188792	0.00273985	0.00250613	0.00305132	0.00328455	0.0032206	0.00355953	0.00342615	0.00382737	0.00451875	0.00570266	0.00731995	0.010127	0.0126878	0.0154993	0.0180188	0.0196504	0.0201173	0.0198666	0.020839	0.0226094	0.0240981	0.0248923	0.0243031	0.0233584	0.0204546
70420632		0.00213731	0.00098242	0.000750814	0.0010498	0.00144655	0.00247649	0.00263928	0.00311578	0.00326183	0.00357474	0.00400415	0.004802	0.00578533	0.00677015	0.0079222	0.00852486	0.0104362	0.0126218	0.0135144	0.0149784	0.0162857	0.0177295	0.0189881	0.0205453	0.0215358	0.0224483	0.0231506	0.0237897	0.023989	0.0242261
70421930		0.00398372	0.00413243	0.00415481	0.00440689	0.00520988	0.00739669	0.00944011	0.0118497	0.0142444	0.0171023	0.019693	0.020693	0.0202165	0.0188433	0.018137	0.017817	0.0184414	0.0191139	0.0183931	0.0170646	0.0159702	0.0147965	0.0146439
70422237		0.00515583	0.00433607	0.00301022	0.00344745	0.0026323	0.00301336	0.00311193	0.00326751	0.00355539	0.00369027	0.00392996	0.00415971	0.00448537	0.00387565	0.00312365	0.00276496	0.00302953	0.00287471	0.0044189	0.00558655	0.00789784	0.0101858	0.015337	0.021962	0.0270615	0.0288672	0.0289416	0.0303786	0.0299897	0.0298975
70422474		0.00331594	0.00323218	0.00311626	0.00305965	0.00307009	0.00315885	0.00326062	0.00331225	0.00322134	0.00312436	0.00427471	0.0048744	0.00954446	0.011695	0.0141806	0.0160357	0.0173172	0.0179354	0.0179435	0.0188468	0.0190802	0.0192894	0.0197913	0.0202859	0.0204563
70422614		0.00498316	0.00501178	0.00542182	0.00588942	0.00623337	0.00597533	0.00684138	0.00672592	0.00596046	0.00742318	0.0100765	0.0112813	0.0106406	0.0119901	0.0146087	0.0180319	0.019243	0.0208809	0.0225068	0.0244982	0.0286699	0.0319134	0.0315163	0.030467	0.0298141	0.0293289	0.0295854	0.0290812	0.0279184	0.0265424
70422781		0.00156866	0.00159145	0.0025866	0.00423796	0.0059187	0.00729497	0.00846235	0.00972075	0.0115445	0.0138719	0.0140575	0.015485	0.0189009	0.0215098	0.0225403	0.0226904	0.0243515	0.0255387	0.0248854	0.026296	0.0260533	0.0248961	0.0233322	0.0210668	0.019926	0.018605
70423395		0.00927001	0.00850778	0.00793385	0.007447	0.006946	0.00636758	0.0058681	0.00531463	0.00500898	0.00417662	0.00336076	0.00190886	0.00211058	0.00391968	0.00620565	0.00833534	0.0109337	0.0132665	0.0148949	0.0151972	0.0171356	0.0193728	0.0214476	0.0224763	0.024635	0.0260524	0.0256002	0.0249387	0.0230357	0.0223697
70423535		0.00275322	0.00230281	0.00225616	0.00245675	0.0025504	0.00269493	0.00308598	0.00368795	0.00468021	0.00466664	0.00438124	0.00498278	0.00476767	0.00466471	0.0052826	0.00549292	0.00643054	0.00872318	0.0111236	0.0113379	0.0135359	0.0154353	0.0173509	0.0197604	0.0215818	0.0227652	0.0203812	0.0208379	0.0225436	0.024156
70423842		0.00602416	0.00537706	0.00481362	0.00494849	0.00519843	0.00479142	0.00402373	0.0035889	0.00404808	0.00510528	0.00789364	0.012265	0.0171598	0.021602	0.0251811	0.02802	0.0303393	0.0314244	0.0317666	0.0305813	0.0273733	0.0251592	0.0210114	0.0191116	0.0162858	0.0166458
70424219		0.00290448	0.00278324	0.00214352	0.00160932	0.00310788	0.00394368	0.00521401	0.00695715	0.009055	0.0113541	0.0142863	0.0161097	0.0176608	0.018835	0.0196191	0.0203766	0.0218224	0.0225278	0.0214975	0.0215291	0.020082	0.0194246	0.0204527	0.0216037	0.0220689	0.0213041
70424386		0.00162609	0.00172573	0.00236494	0.00206028	0.00278754	0.0028898	0.00368353	0.00413572	0.00408633	0.00402092	0.00392644	0.00499674	0.00819045	0.0118163	0.0148796	0.01721	0.0180797	0.019078	0.0198298	0.0219483	0.0244136	0.0257318	0.0255668	0.025389	0.0237655	0.0224835	0.0215544	0.021574
70424456		0.00332194	0.00325034	0.00299283	0.0029323	0.00284665	0.00325982	0.00383181	0.00434032	0.00503726	0.00538064	0.00577786	0.00561273	0.00584425	0.00649461	0.00751833	0.00992453	0.0129497	0.014553	0.0144093	0.0162001	0.0182006	0.0212021	0.0225507	0.0232922	0.022538	0.0225538	0.0218061	0.0215682	0.0214592	0.0224821
70424526		0.00380453	0.00363669	0.00319861	0.00279779	0.00253604	0.00228217	0.00234895	0.00260709	0.00298323	0.00249222	0.00238361	0.00601064	0.0113756	0.016935	0.0213517	0.025884	0.0267948	0.0299709	0.0298524	0.0307752	0.0308788	0.0324391	0.0345655	0.0360731	0.0358618
70424693		0.00255897	0.00304442	0.00363768	0.00427253	0.00503542	0.00577074	0.00673932	0.00919351	0.011466	0.0134181	0.0144746	0.0177204	0.0188648	0.0199074	0.0222762	0.0231643	0.0226692	0.0230349	0.0223003	0.0224903	0.023252	0.0250326	0.0259755	0.0242621
70426131		0.00698593	0.00583853	0.00472118	0.00311046	0.00269767	0.00181316	0.000991589	0.0014302	0.00342621	0.00543003	0.00591998	0.00802095	0.0105822	0.0128674	0.014114	0.014662	0.0142813	0.0141949	0.0140331	0.0140885	0.0147044	0.0164128	0.0201606	0.0241106	0.0264624	0.0272685	0.0269682	0.0253817	0.0236384
70426438		0.00415961	0.00337544	0.00308269	0.00411426	0.00448858	0.00417406	0.00370261	0.00401415	0.00595916	0.00935523	0.00609566	0.00892598	0.0124201	0.0162694	0.0184991	0.0179393	0.0202844	0.0237266	0.0265634	0.0285429	0.0310407	0.0309865	0.0289342	0.027101	0.0267558
70427052		0.00172304	0.00236123	0.00298959	0.00345711	0.00328568	0.0032071	0.00353392	0.00429643	0.00560374	0.00735807	0.00906647	0.0102836	0.0111452	0.0122954	0.0139279	0.0156687	0.0172855	0.0188892	0.0205634	0.0220563	0.0231191	0.0234521	0.0227633	0.0219953	0.0227349	0.0219513	0.0208943	0.0199338	0.0202822	0.0191463
70427359		0.00575171	0.00530913	0.00603619	0.00607122	0.00607486	0.00645849	0.00599077	0.00500814	0.00551393	0.00475615	0.0032573	0.00332766	0.00520995	0.00797082	0.0112038	0.014841	0.014798	0.0199673	0.0234202	0.0252903	0.026272	0.0269471	0.0273521	0.0272727	0.0281523	0.0290111	0.0275323	0.0260546	0.0244467	0.0240693
70427596		0.00319404	0.0034912	0.00349766	0.0036524	0.00389923	0.00407987	0.00404743	0.0039939	0.00357422	0.0036413	0.00429073	0.00495228	0.00627893	0.00815757	0.0102451	0.0134447	0.0143379	0.0165956	0.0187557	0.0206748	0.0247938	0.0309277	0.0342507	0.0347055	0.0331547
70427736		0.00341312	0.00355401	0.00381561	0.00377711	0.00399072	0.00423564	0.00477683	0.00500056	0.00526358	0.0051773	0.00472877	0.00405352	0.00332231	0.00288548	0.00380847	0.00513638	0.00559523	0.0082223	0.0104138	0.0119276	0.0146276	0.0172122	0.0169892	0.0180665	0.0185882	0.0187814	0.0190227	0.0198249	0.0208776	0.0228105
70428043		0.00555962	0.00473884	0.00397304	0.00335183	0.00362031	0.00355278	0.00303814	0.00247868	0.00252157	0.00354051	0.00578186	0.00899465	0.0107273	0.0134563	0.0153723	0.0173787	0.0195534	0.0219658	0.0237048	0.0240695	0.0232561	0.0224995	0.0219506	0.0222254	0.0222754	0.0231633	0.024334
70429955		0.0036335	0.00372884	0.00408115	0.00406351	0.00417082	0.0035275	0.00310612	0.00245386	0.00273637	0.00363983	0.00644705	0.00835812	0.0121724	0.0105592	0.0130827	0.0169078	0.0200777	0.0238188	0.0257322	0.0286017	0.028372	0.0275664	0.0260201	0.0238211	0.0223868	0.0229681	0.0233458	0.0221064	0.0217757
70430262		0.00501731	0.0047458	0.00454371	0.00453199	0.00451892	0.00528366	0.00658675	0.00658622	0.00873755	0.0115117	0.0124622	0.0146641	0.0181224	0.0204303	0.025987	0.0294265	0.0312672	0.0301967	0.0295978	0.0275571	0.0249505	0.0223706	0.0199555	0.0185265
70431630		0.00101917	0.00118508	0.00149398	0.00177309	0.00177244	0.00209307	0.00263676	0.0025851	0.00305005	0.00316125	0.00284624	0.00275794	0.00225371	0.00226022	0.0023634	0.00275802	0.00385642	0.00601202	0.00902501	0.0121109	0.0149564	0.0169101	0.0188344	0.0213588	0.0242173	0.0265679	0.0271498	0.0273751
70431937		0.00234322	0.00190565	0.00146526	0.000713438	0.000444616	0.00194311	0.001622	0.00171038	0.00183713	0.00209533	0.00330774	0.00297782	0.00505565	0.00622428	0.00760535	0.0094447	0.0120457	0.015412	0.0189878	0.0220747	0.0242	0.0250893	0.024638	0.0243332	0.0247313	0.0275237	0.0304362	0.031944	0.0310055	0.0289834
70432621		0.00147237	0.00144883	0.00136339	0.00131885	0.00148491	0.00176872	0.00224975	0.002943	0.00356349	0.00389643	0.00542803	0.00737722	0.0103027	0.0132536	0.0149737	0.0167074	0.0191127	0.0212259	0.0224546	0.0224805	0.0218642	0.0217215	0.0215139	0.0217592	0.0213649	0.019923
70433235		0.00341615	0.00396752	0.00431121	0.00481762	0.00481479	0.00466092	0.00434737	0.00408044	0.00456176	0.00569242	0.00745092	0.00969882	0.0122842	0.0143055	0.0174054	0.0204637	0.0198316	0.0213858	0.021417	0.0209036	0.0209686	0.022105	0.0233464	0.023749	0.0249757	0.0245449	0.0250609	0.0236028
70434086		0.00402733	0.00411792	0.00387436	0.0034943	0.00332279	0.00352633	0.0038444	0.00431989	0.00571358	0.00783027	0.0088733	0.00894184	0.0117173	0.0142172	0.0162863	0.0171543	0.01838	0.0207574	0.023048	0.0231499	0.0245824	0.0238867	0.0232046	0.0229499	0.0212561	0.0190755	0.0190823
70434156		0.00409122	0.00458781	0.00478721	0.00454009	0.00407025	0.00361147	0.00330777	0.00341432	0.00455909	0.00682542	0.00947262	0.0117628	0.0134101	0.0150095	0.0176524	0.0218505	0.0254594	0.0301473	0.0338616	0.0335523	0.0309798	0.0258593	0.0238698	0.0203861	0.0180433
70434463		0.00286542	0.00175233	0.00145695	0.00254533	0.00419998	0.00596383	0.00795407	0.0109744	0.0138998	0.0160468	0.0175805	0.0177162	0.0183753	0.0208111	0.0227695	0.0255457	0.0265388	0.027316	0.0272994	0.0261409	0.0255896	0.0241705	0.0209111	0.0166889	0.0138494	0.0115054	0.0098847	0.00956425	0.00908105	0.00904743
70434603		0.00279094	0.00219397	0.00187029	0.00246765	0.00336028	0.00417535	0.00483726	0.00514426	0.00479512	0.00393034	0.00499302	0.00609733	0.00805054	0.00976248	0.0104571	0.0121033	0.0154571	0.0190247	0.0225549	0.0254231	0.0258696	0.025172	0.0249344	0.024779	0.0233152	0.0235298	0.0217432
70434840		0.00284272	0.00362923	0.00416696	0.00443135	0.00437312	0.00379324	0.00346911	0.00358283	0.00378365	0.00351733	0.00269529	0.00346084	0.00272327	0.00220052	0.00322442	0.0057408	0.00705698	0.0101301	0.00934312	0.0130593	0.0169729	0.0198974	0.0207474	0.0208045	0.0200756	0.0196052	0.0195564
70435384		0.00191893	0.00246283	0.00275365	0.00331301	0.00385785	0.00371339	0.00389286	0.00122807	0.00089017	0.00342203	0.00612385	0.00940908	0.0138179	0.0167794	0.0161859	0.0209488	0.0230792	0.0252414	0.0271825	0.0275813	0.0267433	0.0253752	0.0256321	0.0254732	0.026293	0.0263079
70435524		0.00221467	0.00162232	0.00150833	0.00205061	0.00288752	0.0038545	0.00583718	0.00827092	0.0110199	0.013641	0.0155581	0.0179583	0.0199495	0.0214429	0.0226341	0.0246286	0.0266813	0.02841	0.0281375	0.025888	0.0232127	0.0205053	0.0176441	0.0167845	0.0161802	0.0161206	0.0164717
70435901		0.00333932	0.00338533	0.00363027	0.00366831	0.0039158	0.00438671	0.00512566	0.00619373	0.00759377	0.00932884	0.011174	0.0127196	0.0137897	0.0143187	0.0132156	0.0122566	0.0118349	0.0120943	0.0137847	0.0158362	0.019846	0.0227401	0.0242307	0.0249255	0.0235258	0.0214362
70436682		0.00769758	0.00762051	0.00600783	0.00484332	0.00443949	0.00361575	0.0030252	0.00258498	0.00223814	0.00169086	0.00163702	0.00203456	0.00248655	0.00295845	0.0028928	0.00344248	0.00376264	0.00382608	0.00364067	0.0036803	0.00328077	0.00309475	0.00295453	0.00311596	0.00352626	0.0046257	0.00675215	0.00942214	0.0111648	0.0115741
70436822		0.00593378	0.00419804	0.00364406	0.00394083	0.00420847	0.00426613	0.00414298	0.00326405	0.00327268	0.00339398	0.00356096	0.00380284	0.00385542	0.00404293	0.00465127	0.00583344	0.00589295	0.00729817	0.00898386	0.0120994	0.0137571	0.014807	0.0162783	0.0188053	0.0206174	0.0222431	0.0257394	0.0254743	0.0240079	0.0228249
70436989		0.0040582	0.00419779	0.00410336	0.00402752	0.00387735	0.00260909	0.00250108	0.00369182	0.00552692	0.00726523	0.00958278	0.0115062	0.0122629	0.0140542	0.015742	0.0174699	0.021828	0.0228817	0.0263616	0.0262423	0.0256832	0.0231093	0.0192646
70437129		0.00698434	0.00694965	0.00649698	0.00626185	0.00581995	0.00566867	0.00514642	0.00481392	0.00459727	0.00463026	0.00505123	0.00550261	0.00551961	0.00498005	0.00399436	0.00278197	0.00173421	0.00162537	0.00246186	0.00344927	0.00500856	0.00722992	0.00933303	0.0112732	0.0131319	0.0165089	0.0192141	0.0209572	0.0227338	0.0246752
70437673		0.00485562	0.00481696	0.00433578	0.00387005	0.00391643	0.00412682	0.00390507	0.00325307	0.00288	0.00364363	0.00510404	0.00636803	0.00873195	0.0117487	0.0152118	0.0191148	0.023118	0.0260765	0.0269399	0.026558	0.0272906	0.0293477	0.0316812	0.0336095	0.0330882
70438050		0.00367777	0.00454678	0.00663237	0.00722748	0.00874801	0.0108496	0.0123539	0.0183979	0.0227736	0.0293184	0.0316155	0.0326888	0.030568	0.0297141	0.0276531	0.0243058	0.021264	0.0162067	0.0135036	0.0120842	0.0110536
70438287		0.00686338	0.00662443	0.00647075	0.00697033	0.00631721	0.00548049	0.0051879	0.00618637	0.00667857	0.00852203	0.0107754	0.013116	0.0147823	0.0155447	0.0171684	0.0175622	0.019392	0.0200248	0.0187434	0.0184764	0.0181347	0.0194951	0.0203255	0.0200259	0.0193245	0.0184143
70438594		0.00433257	0.00373366	0.00326946	0.00411423	0.00526289	0.00604338	0.00700652	0.00811818	0.00901566	0.0109063	0.0122397	0.0136913	0.0162439	0.0171344	0.0192093	0.020517	0.0199597	0.0195462	0.0192834	0.0199377	0.0213904	0.0222407	0.0212005	0.0183639
70438664		0.00255977	0.0018215	0.00190213	0.00273161	0.0043197	0.00586344	0.00822622	0.0106406	0.0135366	0.0131918	0.0140646	0.0148409	0.0144496	0.0152859	0.0177799	0.0213481	0.0230377	0.0240198	0.0242351	0.0239596	0.0221229	0.0213651
70439892		0.0037631	0.00422187	0.00488636	0.00514627	0.00493033	0.00453517	0.00373763	0.00443337	0.00348583	0.00307636	0.00268627	0.00299768	0.00394901	0.00545689	0.00687935	0.00758871	0.00836101	0.00922206	0.0106282	0.0127289	0.0153627	0.0182972	0.0212753	0.0236577	0.0254803	0.0261146	0.0265004
70439962		0.00490753	0.00471017	0.00429696	0.00367754	0.00301402	0.00244269	0.00215652	0.00184975	0.00255952	0.00255101	0.00296242	0.00394625	0.00542544	0.00736787	0.00969172	0.0122151	0.0142354	0.0161183	0.018053	0.0202921	0.022145	0.0235539	0.0235659	0.0226513	0.0214033	0.0208864	0.0219532	0.0230875
70440576		0.00300369	0.00353808	0.00400433	0.00433571	0.00521159	0.00596849	0.00634489	0.00617236	0.00603435	0.00651091	0.00777114	0.0098426	0.0126116	0.0159552	0.0196574	0.0231649	0.0255946	0.0273384	0.0273326	0.027701	0.0278446	0.027013	0.024247	0.0215611	0.0202763	0.0194183	0.018099
70440646		0.00303805	0.00352251	0.00313875	0.00389167	0.00430692	0.00463551	0.00466832	0.00428759	0.00350699	0.00251786	0.00184974	0.00219862	0.00313799	0.00526793	0.00956982	0.0143145	0.0190151	0.0232438	0.0271125	0.0307223	0.0329845	0.0318367	0.0291034	0.0253604	0.0231107	0.0232337
70441497		0.00442953	0.00401936	0.00325154	0.00261369	0.00245001	0.00246028	0.00273216	0.00293015	0.00303286	0.00304621	0.00293244	0.0028737	0.00292706	0.00394242	0.00591918	0.00570668	0.00847818	0.0114913	0.0159816	0.019319	0.0223455	0.0255303	0.0277231	0.0280649	0.0265923	0.025728	0.0251005	0.0249646	0.024721	0.0256869
70441567		0.00369822	0.0045074	0.00526201	0.00565355	0.0055294	0.00519133	0.00468676	0.00432194	0.00500239	0.00490197	0.00558863	0.00712466	0.00881224	0.011444	0.0140399	0.0163818	0.0175652	0.0175861	0.0183315	0.0184214	0.0195768	0.0218844	0.0242173	0.0251449	0.0247146	0.0242148	0.0221127	0.019312	0.0169642
70441637		0.00210516	0.00236393	0.00220346	0.00288222	0.00318633	0.00330548	0.00331247	0.00348894	0.00370199	0.00380627	0.00367969	0.00355858	0.00335495	0.00377106	0.00443858	0.00441756	0.00631108	0.00721137	0.0106021	0.0129398	0.0157355	0.0155404	0.0180312	0.0194658	0.0211546	0.0223077	0.0225932	0.02338	0.0235331	0.0221629
70441707		0.00777326	0.00760693	0.00733154	0.00723838	0.00714121	0.00699867	0.00697054	0.00750555	0.0079133	0.00803967	0.00803545	0.00577353	0.0051365	0.005193	0.0064618	0.00872807	0.0121821	0.0162837	0.0200465	0.0224804	0.0235732	0.0248501	0.0250998	0.0261195	0.0283873	0.0308719	0.0302776	0.0288436	0.0255272	0.0218288
70442014		0.00248211	0.00278195	0.00232365	0.00246211	0.00337146	0.00655032	0.0100279	0.00883747	0.0127004	0.0109689	0.014637	0.0161965	0.0174465	0.0187628	0.0198671	0.0212076	0.0246616	0.0267927	0.028717	0.0290455	0.0286106	0.0265094	0.0244308	0.0231497	0.0215992	0.019755	0.0176021
70442181		0.00791707	0.00767753	0.00749041	0.00672504	0.00644249	0.00636984	0.00615404	0.00651714	0.00802026	0.00807441	0.0112623	0.0138148	0.0168099	0.0186024	0.0191833	0.0210832	0.0215412	0.0211515	0.0223808	0.0247875	0.0268606	0.0288846	0.0306395	0.0320751	0.0313119	0.0283731	0.0269091	0.0268331
70442251		0.00197542	0.00171267	0.00146533	0.00153023	0.00201029	0.00276219	0.00373506	0.00462406	0.00587092	0.00696914	0.00825095	0.00995692	0.0112182	0.0122203	0.0144918	0.0164833	0.0181032	0.0194384	0.0210207	0.0229832	0.0245057	0.024938	0.024624	0.0238585	0.0232067	0.0213143	0.0192692	0.018077	0.0159722
70442321		0.00290961	0.00364248	0.00421645	0.00447089	0.00551909	0.00695297	0.00890559	0.0115637	0.0147204	0.0179102	0.0206134	0.0224054	0.0233415	0.0230581	0.023316	0.0235278	0.0212803	0.0217294	0.0212723	0.0195466	0.0202352	0.0211618	0.0206359	0.0191542	0.0180823
70442488		0.00331798	0.0036277	0.00380045	0.00410497	0.00495113	0.00500324	0.0056831	0.00717977	0.00981212	0.010219	0.0130373	0.0164469	0.0197929	0.0187225	0.0215467	0.0241237	0.0256295	0.0262651	0.0245458	0.0219436	0.0211209	0.023146	0.0223663	0.0232175	0.0227861	0.019994	0.0179537	0.0160799	0.0141145
70442795		0.00432705	0.00429045	0.00412425	0.00448931	0.00485899	0.00628744	0.0062982	0.00819521	0.0110905	0.0138503	0.0122665	0.0146163	0.0161117	0.0197866	0.0226225	0.0274462	0.0303471	0.0300755	0.0289678	0.0281326	0.0260501	0.0222188	0.0174498
70442935		0.00737587	0.00557772	0.00370464	0.00392315	0.00233615	0.000953895	0.00015798	0.00197347	0.00361411	0.00606902	0.00794522	0.0109661	0.0140539	0.0183283	0.021616	0.0230904	0.0228051	0.0218831	0.0208552	0.022165	0.0241043	0.0254406	0.0267945	0.0266819	0.0260205	0.0224886
70443479		0.00266777	0.00296793	0.00339198	0.0041382	0.0048557	0.00572858	0.00684569	0.00799153	0.00907814	0.0101802	0.012217	0.0143755	0.015505	0.0173653	0.0201766	0.022491	0.0238072	0.0236017	0.0222493	0.0220234	0.0209219	0.0208073	0.019252	0.0185103	0.017529	0.0163002	0.0150997	0.0139616	0.0123495
70444163		0.00204529	0.00242433	0.00275287	0.00308866	0.00322061	0.00325763	0.0035486	0.00397043	0.00442317	0.00485418	0.00479443	0.00482636	0.00457988	0.0053645	0.00701195	0.00661784	0.00946456	0.0109752	0.014312	0.0162665	0.0177938	0.0187544	0.0196482	0.020146	0.0200476	0.0200232	0.0205157	0.0227174	0.0226731
70444470		0.00342512	0.00140819	0.00065067	0.00188365	0.00310692	0.00432198	0.00445603	0.0052071	0.00714668	0.00990798	0.0123726	0.0140007	0.0117468	0.0145128	0.0127428	0.0151499	0.0176515	0.0203272	0.0224612	0.0256142	0.0283727	0.0301122	0.0308305	0.0270509	0.0221623	0.0188071	0.0159427	0.0136948	0.0136217
70445154		0.00462455	0.00684264	0.00894028	0.0108933	0.00849388	0.00984486	0.0119177	0.0129459	0.0157153	0.0168364	0.0171376	0.0182109	0.0181843	0.019704	0.0213672	0.02286	0.023556	0.0250476	0.0228733	0.0189967	0.0169577	0.0152373
70445601		0.00480364	0.00317237	0.00223065	0.00271006	0.00308257	0.0031248	0.00460787	0.00468278	0.00745352	0.0116557	0.0111549	0.0138612	0.016241	0.0168965	0.0169057	0.0185094	0.0178189	0.0184371	0.01736	0.0163797	0.015767	0.0160198	0.016928	0.0187383	0.0205093	0.0207664	0.0201502	0.0189707	0.0183121	0.0184926
70445908		0.00717076	0.00675119	0.00695971	0.00846661	0.0105075	0.011428	0.0117225	0.0119858	0.0125443	0.0138221	0.0167794	0.0194437	0.0210135	0.020762	0.0223961	0.0210898	0.021326	0.0205638	0.0205741	0.0211343	0.0212241	0.0188427	0.0180961	0.016962	0.0165958	0.0161949	0.0155627	0.0143505	0.0125721
70446075		0.000774055	0.000797137	0.00123447	0.00256951	0.00392441	0.00499073	0.00358732	0.00416672	0.00544949	0.00731015	0.00936154	0.0128002	0.0154819	0.0173742	0.019982	0.0218719	0.0228182	0.023109	0.0231026	0.0231171	0.0239116	0.0243945	0.0263266	0.0265355	0.0242208	0.0219986	0.0179476
70446145		0.00306991	0.00295097	0.0028162	0.00254483	0.00230519	0.00237067	0.0026492	0.00356568	0.00411031	0.00467933	0.00559026	0.00692581	0.00843564	0.0101706	0.0121461	0.0141125	0.0159109	0.0169884	0.019923	0.020419	0.0210503	0.0208867	0.0204548	0.0210324	0.0224551	0.0240386	0.0243659	0.0234908	0.0214368	0.0182747
70446759		0.00386951	0.00363899	0.00381669	0.00362884	0.0034469	0.00387144	0.00518845	0.00577506	0.00638756	0.00925345	0.0136085	0.017529	0.0203024	0.0226491	0.0236683	0.0252653	0.026055	0.0256445	0.0252399	0.0244606	0.0256698	0.0247256
70446996		0.00246882	0.00165351	0.0009712	0.00142274	0.00191986	0.00230268	0.00259339	0.00275332	0.00296107	0.0033377	0.00377604	0.00412759	0.00439741	0.00455532	0.00534439	0.00691396	0.00778886	0.00923517	0.0123416	0.0151554	0.017655	0.0192985	0.0184426	0.0189664	0.0200819	0.0204818	0.0208763	0.0219709	0.0241697	0.024871
70447750		0.00146367	0.00125776	0.00130292	0.00162337	0.0021346	0.00293424	0.00360519	0.00345578	0.00379726	0.0042354	0.00543587	0.00763275	0.0107287	0.0143752	0.0178781	0.0204937	0.0218766	0.0231379	0.0261877	0.0275139	0.0287354	0.0293248	0.0300285	0.0304011
70448434		0.00763115	0.00809626	0.00918741	0.00982664	0.0112657	0.0118977	0.0113212	0.0138338	0.0179217	0.0215856	0.0238348	0.025469	0.0271975	0.0284197	0.0304276	0.0295394	0.0303755	0.0295474	0.0278593	0.0241205	0.0200872	0.0211718	0.0187381	0.0185904	0.0170762
70448671		0.00352699	0.00439323	0.00511498	0.00562049	0.00619438	0.00770149	0.00959282	0.0109381	0.0118185	0.012361	0.0130759	0.0144734	0.016086	0.0183539	0.0200277	0.0209465	0.0214022	0.021839	0.0218088	0.0213769	0.0200181	0.0185975	0.0180136	0.0171583	0.0161957	0.0148554	0.0139604
70449802		0.00273603	0.00252687	0.00271635	0.0031367	0.00321114	0.00320106	0.00371263	0.0058819	0.00951134	0.0135824	0.0174066	0.0206361	0.0230519	0.0248006	0.0251018	0.0271455	0.0293127	0.0315686	0.0330632	0.0331595	0.0304282	0.0283447	0.026146	0.025	0.0239669	0.0217192	0.0192003
70450276		0.00391847	0.00338599	0.00384819	0.00382532	0.0030234	0.00317351	0.00350767	0.0034382	0.00332741	0.00328414	0.00349459	0.00399683	0.00506862	0.00717611	0.00979797	0.0123402	0.012977	0.017323	0.0192898	0.0209639	0.022818	0.0249511	0.02686	0.028181	0.0286923	0.0275644	0.0259805	0.0244374	0.0233438	0.0225409
70450346		0.000911411	0.00127899	0.00182772	0.00250396	0.00332999	0.00419201	0.00558289	0.00725208	0.00932634	0.0119697	0.015148	0.0183696	0.0209529	0.0226056	0.0234041	0.0232677	0.0210135	0.0209315	0.0184257	0.0180439	0.019659	0.0196143	0.0216522	0.0209241	0.0207348
70451881		0.00330035	0.00331765	0.0026059	0.00278055	0.002564	0.00258535	0.00284255	0.00335071	0.00381788	0.00391932	0.00456652	0.00509125	0.00488024	0.00534896	0.0046507	0.00583385	0.00577647	0.00888866	0.0131795	0.0149366	0.0157218	0.0157008	0.0164557	0.0180184	0.0217309	0.0241452	0.0254219	0.026647	0.0272777	0.0260052
70452021		0.00352118	0.00313743	0.00350913	0.0029042	0.0032365	0.00275858	0.00237975	0.00254951	0.00412753	0.00535331	0.0073386	0.00828299	0.00993692	0.012513	0.015355	0.0183318	0.0203255	0.0228215	0.0234858	0.0236382	0.0250767	0.0241886	0.0240585	0.0224258	0.0213128	0.0206595	0.0190739	0.0185713	0.0190625	0.0192762
70452495		0.00317901	0.00303343	0.00272055	0.0022107	0.00159648	0.00235908	0.00349101	0.00484355	0.00637273	0.00807535	0.00985519	0.011685	0.0138502	0.0202255	0.0234595	0.026742	0.0291918	0.0307603	0.0327269	0.0334501	0.0347722	0.0319864	0.0273975	0.0226839	0.0193183	0.0180408	0.0159866
70454547		0.00569603	0.00594078	0.00706784	0.00825348	0.00958471	0.00849532	0.00962928	0.0105233	0.0117046	0.0123791	0.0128494	0.0131386	0.0139009	0.0165258	0.020323	0.0237225	0.0251242	0.0268622	0.0268447	0.0253969	0.0255151	0.0259385	0.0266312	0.02429	0.0228711	0.0210076	0.0193977
70454784		0.00594211	0.00681079	0.00735112	0.00804886	0.0100223	0.0108475	0.0113729	0.0150739	0.0185297	0.0199391	0.0225875	0.0252436	0.0261485	0.0252905	0.0246294	0.0263681	0.0273217	0.0279548	0.0267207	0.022693	0.0187016	0.0147621	0.0125323
70455538		0.00344647	0.00411158	0.00472713	0.00455322	0.00515174	0.00425971	0.00421059	0.00430381	0.00478045	0.00519121	0.00539807	0.00515555	0.00438321	0.00384057	0.00290621	0.00258711	0.00431228	0.00693125	0.0093269	0.0129018	0.0112517	0.0134334	0.0141094	0.0154782	0.0186684	0.0223363	0.024842	0.0256707	0.0249206	0.0262161
70455775		0.000759967	0.00124543	0.00219622	0.00355772	0.00465216	0.00551065	0.00650208	0.00810386	0.0104115	0.0131276	0.0160063	0.0190473	0.0222201	0.0248627	0.0261143	0.0248643	0.0221029	0.0208389	0.0202432	0.021662	0.0247945	0.0262659	0.0258502	0.023668	0.023212
70455845		0.00145825	0.00191118	0.00272176	0.00332699	0.00343123	0.00294321	0.00290989	0.00301346	0.00340777	0.00359918	0.00333886	0.0028955	0.00261576	0.00323839	0.00584063	0.00906602	0.0124004	0.0156115	0.0185179	0.0212222	0.0247387	0.0255553	0.0265852	0.0281142	0.0289485	0.0295933	0.0296469	0.0280388	0.0251922	0.0228202
70455915		0.00248778	0.00159609	0.00115554	0.00123541	0.00187505	0.00178371	0.00208439	0.00287413	0.00440805	0.00651274	0.0084647	0.00837843	0.00989965	0.00948326	0.0118377	0.0153419	0.0175844	0.0200406	0.0173956	0.0186516	0.0202332	0.0225079	0.0237206	0.0248674	0.0255085	0.0255235	0.0223103	0.0218831	0.0205502	0.020296
70456906		0.00290403	0.00260368	0.00332641	0.00436635	0.00550906	0.00704912	0.00779888	0.0107833	0.0139027	0.0153315	0.0176178	0.0184079	0.0182794	0.0174957	0.0165207	0.0166764	0.0167956	0.0172786	0.0192722	0.0204971	0.0234334	0.0247896
70457450		0.00666266	0.00673412	0.00600757	0.00495589	0.00384389	0.00339749	0.00378467	0.00444331	0.00399352	0.00263427	0.00188322	0.00470415	0.00832255	0.0115871	0.0143967	0.0163192	0.0173134	0.0174949	0.0177614	0.0188209	0.0219693	0.0231001	0.0257937	0.0266516	0.026088	0.0247635
70457520		0.00333487	0.00241746	0.00217894	0.00237878	0.0026525	0.00268912	0.00278127	0.0030512	0.00368718	0.00453476	0.00552666	0.00654006	0.00715709	0.00766327	0.00851586	0.0096812	0.0120979	0.014931	0.0175468	0.019728	0.0209787	0.0218722	0.0245779	0.0293134	0.0321677	0.0339915	0.0351388	0.0326897	0.0308597	0.0267834
70457994		0.00273841	0.0026958	0.00337385	0.00424038	0.0046241	0.00428414	0.00354739	0.00418843	0.00427033	0.00681464	0.00918497	0.0121384	0.0151901	0.0152875	0.0206882	0.0224648	0.0221322	0.0219204	0.0191886	0.0161218	0.0135014	0.0134048	0.0127943	0.0137348	0.0160719	0.0184908
70458371		0.0021895	0.000772045	0.000773692	0.00200058	0.00332102	0.0046721	0.00596041	0.00741625	0.00872006	0.0101078	0.0108435	0.0141042	0.0165773	0.0192344	0.0213103	0.0224301	0.0230919	0.0238347	0.0245743	0.0249559	0.0244048	0.024845	0.0234126	0.0238996	0.0228853	0.0218946
70459432		0.00340195	0.00257265	0.00162154	0.0006524	0.000760494	0.00174091	0.00259648	0.00309394	0.00446567	0.00764112	0.0118629	0.0162743	0.0204386	0.0239077	0.0258732	0.0265719	0.0268999	0.0268641	0.0274908	0.0269197	0.0262053	0.0255699	0.0259563	0.0240872	0.0224067
70459502		0.00732952	0.00858037	0.00872583	0.0111582	0.01309	0.014187	0.014806	0.0164844	0.016834	0.0175912	0.0187853	0.0202948	0.0217646	0.0220156	0.0212092	0.020165	0.0190741	0.0179345	0.0173956	0.018313	0.0185208
70460046		0.00314692	0.00294443	0.00259673	0.00209432	0.00152165	0.00122328	0.00124665	0.00284814	0.00519624	0.00696411	0.00899685	0.00501843	0.0084735	0.0118732	0.0152248	0.0176244	0.0192951	0.0206581	0.022046	0.023096	0.0223984	0.0213775	0.0212733	0.0210261	0.0212188	0.0225441	0.0226586	0.0213598	0.0196239	0.0185597
70460283		0.00418855	0.00474426	0.00544594	0.00617741	0.00675176	0.0070989	0.00792168	0.00894172	0.0101763	0.0118244	0.0140622	0.0168166	0.0188911	0.0193212	0.0205683	0.0214663	0.0220642	0.022353	0.0222926	0.0211887	0.0198031	0.0182909	0.0173802	0.0183157	0.0202959	0.0220149	0.0225111	0.0231659
70460590		0.00160453	0.0030017	0.00464332	0.00681053	0.00839708	0.0118712	0.0165543	0.0205592	0.0232009	0.0264671	0.0273212	0.02597	0.0233404	0.0203351	0.0193453	0.0200701	0.0197403	0.0202187	0.0202608	0.0205012
70460967		0.00312679	0.00388424	0.00371002	0.00354483	0.00388219	0.00516832	0.00679459	0.0046397	0.00638663	0.00888029	0.0118044	0.0139134	0.0151296	0.0170248	0.0177373	0.0215044	0.023053	0.0243055	0.0224296	0.0234777	0.0235959	0.0250358	0.0248367	0.0257804	0.0273141	0.0266655	0.0262394
70461037		0.00608151	0.00665786	0.00697558	0.00731761	0.00767912	0.00811767	0.00829257	0.00858213	0.00907664	0.0104899	0.0116591	0.0125393	0.0131605	0.0145601	0.0164378	0.0183605	0.0196734	0.019879	0.018987	0.0160826	0.016353	0.0180924	0.0169302	0.0186978	0.0211419	0.0226314	0.0234742	0.0240888	0.0242063
70463563		0.00203792	0.00202994	0.00194934	0.00209054	0.0018863	0.00211412	0.00263309	0.00225174	0.00428652	0.00614459	0.00833075	0.00827304	0.0107403	0.0148402	0.0173774	0.0195103	0.0224172	0.0214684	0.0207584	0.0221501	0.0224692	0.0239218	0.0235592	0.0231127	0.0234836	0.0227731	0.0236558	0.0240813
70463703		0.00260093	0.00326667	0.00377952	0.00411973	0.0042848	0.00434999	0.00460229	0.00479152	0.00409712	0.00497068	0.00602971	0.00794608	0.00804669	0.0101569	0.0127732	0.0129484	0.0162489	0.0185487	0.0196055	0.0200065	0.0202823	0.0205397	0.0210927	0.0217099	0.0217011	0.0224306	0.0231974	0.0243662	0.0247938
70463940		0.00318159	0.00329842	0.00532155	0.00816519	0.0113458	0.0145679	0.0175792	0.0200825	0.0218465	0.0229199	0.0226491	0.0221689	0.022626	0.023144	0.0234145	0.0232822	0.0205923	0.0182885	0.0175985	0.0175082	0.0169923
70464791		0.00372329	0.00387695	0.0042068	0.00456769	0.00499533	0.00539552	0.00596398	0.00658756	0.00733952	0.00941471	0.0110454	0.0132726	0.0154169	0.0167204	0.0170652	0.017642	0.0185166	0.0193816	0.0213005	0.0239266	0.0245731	0.0244396	0.0217714	0.0209806	0.0216057	0.022884	0.0234892	0.0243684	0.0237346	0.0223309
70465308		0.00359233	0.00394272	0.00428877	0.00375901	0.00378923	0.00353723	0.00330234	0.00345846	0.00339354	0.00323311	0.00270557	0.00269939	0.00335503	0.00537435	0.00772468	0.0103473	0.0136296	0.0171167	0.0202268	0.022745	0.0244918	0.0257335	0.0266973	0.0277288	0.0293146	0.0301712	0.0306854	0.0305394	0.0285672
70465545		0.00625907	0.00576224	0.0052317	0.00457875	0.0036249	0.00248944	0.00209202	0.00147579	0.00126489	0.00123462	0.00147213	0.00180466	0.00213057	0.00270545	0.00344831	0.00514329	0.00809614	0.0133894	0.0153136	0.0167088	0.0184602	0.0203791	0.0216265	0.022896	0.0236511	0.0234594	0.0219804	0.0208347	0.0212067	0.0222343
70465615		0.00293962	0.00293806	0.00300264	0.00280901	0.00252531	0.00282484	0.00420721	0.00517715	0.0056346	0.00602441	0.00601693	0.00573423	0.00530688	0.00463687	0.00369413	0.00345667	0.00469738	0.00667977	0.00811637	0.00883718	0.0130066	0.0150035	0.0175156	0.0197184	0.0220405	0.0235425	0.0238531	0.0229393	0.0227155	0.0234022
70466159		0.00274608	0.00271173	0.00244181	0.00202963	0.00183152	0.00203047	0.00242344	0.00254485	0.00253003	0.00319082	0.00607218	0.00872852	0.0118879	0.0156407	0.0196881	0.0233429	0.0257184	0.0265407	0.0262098	0.025572	0.0259847	0.0268455	0.0280378	0.0281489
70466396		0.00424119	0.00410873	0.00403762	0.00387556	0.00233944	0.00247621	0.00295217	0.00389091	0.00524577	0.00681025	0.0092665	0.0110828	0.0128263	0.0148014	0.0175081	0.020678	0.023318	0.0244707	0.0246605	0.0247107	0.0223256	0.0205148	0.0195107	0.0176406	0.0175406	0.0184662	0.0201275	0.0207468
70466536		0.00410599	0.00470585	0.00548706	0.00605337	0.00532557	0.00593111	0.00679348	0.00720963	0.00854747	0.0100546	0.0127157	0.0163216	0.0188426	0.0201436	0.0204979	0.0207923	0.0214102	0.021524	0.0221515	0.0223992	0.0217143	0.0197351	0.0172955	0.0156317	0.0137912
70467150		0.00347947	0.00311855	0.00306805	0.00277648	0.00253707	0.0024129	0.00244216	0.0025766	0.00269369	0.00269563	0.00265133	0.00262924	0.00257164	0.00245329	0.0027145	0.00390031	0.00606377	0.00577834	0.0119486	0.00888928	0.0121149	0.0150441	0.017842	0.0201203	0.0210046	0.022349	0.0249461	0.0269923	0.0266717	0.0238784
70467220		0.00410462	0.00340957	0.00254816	0.00318391	0.00315394	0.00393904	0.0046725	0.00613419	0.00606608	0.00857075	0.0110087	0.0135427	0.0169148	0.0208293	0.0246803	0.0274118	0.028273	0.028097	0.027327	0.0261629	0.0231951	0.0200037	0.0184444	0.0162774	0.0156547	0.0151031
70467387		0.00509169	0.00496503	0.00429187	0.00325942	0.00283186	0.00376019	0.00542557	0.0082089	0.0114395	0.0149434	0.0185982	0.0201688	0.022911	0.0252964	0.0271987	0.0292434	0.0300636	0.0296326	0.027604	0.0246653	0.0219524	0.0196766	0.0175746	0.0157687	0.0143185
70467764		0.00316588	0.00335344	0.00402674	0.00468164	0.00446055	0.00452527	0.00429929	0.00398546	0.00337504	0.00272846	0.00379678	0.00608394	0.00897715	0.0145779	0.0162667	0.0175644	0.0185755	0.0193243	0.0196119	0.0195014	0.0193111	0.0198215	0.0198299	0.0224334	0.0231513	0.0229959	0.0224453	0.0209455	0.0187043
70469062		0.00179543	0.00165452	0.00128091	0.000866219	0.000456038	0.00050416	0.00105708	0.00173931	0.00253538	0.00338827	0.00420628	0.00495829	0.00573098	0.00664589	0.00785964	0.00966462	0.0121616	0.0149428	0.0174357	0.0190204	0.0192448	0.0183517	0.0180639	0.0173417	0.0184152	0.0204795	0.0223734	0.0231494	0.0235488	0.0252694
70469132		0.00339693	0.00367063	0.00370524	0.00353922	0.00323974	0.00190875	0.00354045	0.00544968	0.00720404	0.00876743	0.0105005	0.0125713	0.0155453	0.0163785	0.0174919	0.0198041	0.0233818	0.0268362	0.0284287	0.0280643	0.0259686	0.0229899	0.0205668	0.0180175	0.0160583	0.0158953	0.0151457	0.014541
70470667		0.00118917	0.000903811	0.000639924	0.00133183	0.00176115	0.00250479	0.00323857	0.00412772	0.00539476	0.00713129	0.00927945	0.0094569	0.0118133	0.0146397	0.0169236	0.0176082	0.0192221	0.0200923	0.0203489	0.0203238	0.019682	0.0189232	0.0198402	0.0211374	0.0214773
70470974		0.00342339	0.00460271	0.00572096	0.00644171	0.00566199	0.00625401	0.00682283	0.00754266	0.00884905	0.0111637	0.0140878	0.0176311	0.0213318	0.0240524	0.0254538	0.0253891	0.0248381	0.0242951	0.0235616	0.0234461	0.0236541	0.0247928	0.0243364	0.023025	0.0220508	0.0209088
70471044		0.0032457	0.00271187	0.0025251	0.00241689	0.0022946	0.00271151	0.00405762	0.00604053	0.00867818	0.012183	0.0209454	0.0246958	0.0267534	0.0277421	0.0264061	0.023419	0.0212565	0.0194736	0.0184472	0.0190435	0.0200894	0.0189404	0.0192307
70471895		0.00277847	0.00286241	0.00307179	0.00345947	0.00407156	0.00502406	0.00669708	0.00850939	0.00986334	0.0107905	0.0116124	0.0133231	0.016338	0.0192237	0.0202973	0.0214117	0.0223268	0.0240004	0.0260495	0.0261904	0.0240498	0.0228325	0.020945	0.0199029	0.0179062	0.01533
70472035		0.00272991	0.0034877	0.0048464	0.0071893	0.0090048	0.00880992	0.011425	0.0143108	0.0140224	0.0159782	0.0170244	0.0187037	0.0195927	0.0213503	0.0249432	0.0280365	0.029813	0.0307011	0.0292294	0.0257456	0.0241998	0.0222485	0.0183966	0.0160162	0.015262	0.0139178
70472342		0.00171713	0.00144237	0.00255554	0.00392154	0.00476394	0.00512134	0.00539253	0.00586626	0.00554413	0.00579448	0.0066553	0.00738446	0.00896324	0.00973554	0.0113369	0.012367	0.0125546	0.0155763	0.0174259	0.020017	0.0208494	0.0229603	0.0242594	0.0255606	0.0265751	0.0273695	0.0285719	0.0296664	0.0285529
70472649		0.00294606	0.00282058	0.0030171	0.00327212	0.00355644	0.00428973	0.00463853	0.00462305	0.00425017	0.00410261	0.00391922	0.004575	0.00686075	0.00970591	0.0124754	0.0146394	0.0132762	0.014757	0.0201556	0.024272	0.0271146	0.0271523	0.0258718	0.0241728	0.0246911	0.0240808	0.0245238	0.0248874
70472886		0.00407805	0.00272564	0.00191588	0.00179565	0.0018999	0.00206878	0.00220533	0.00222023	0.00215343	0.00212426	0.00230345	0.00250401	0.00313738	0.00397217	0.00486758	0.00563876	0.00601143	0.00682268	0.00864216	0.0104398	0.0119304	0.0142639	0.0171646	0.0199966	0.0221188	0.0229984	0.0239357	0.0243079	0.022756	0.0212225
70473026		0.00234559	0.00157782	0.00155342	0.00139087	0.00143191	0.0013705	0.00106577	0.00080225	0.000842213	0.00152399	0.00200765	0.00213621	0.00252142	0.00336205	0.00469346	0.00629379	0.00794292	0.00911269	0.0100145	0.0127508	0.0155735	0.0176694	0.0185099	0.0182118	0.0181192	0.0188803	0.0210291	0.0243967	0.0260248
70473263		0.00260093	0.00326667	0.00377952	0.00411973	0.0042848	0.00434999	0.00460229	0.00479152	0.00409712	0.00497068	0.00602971	0.00794608	0.00804669	0.0101569	0.0127732	0.0129484	0.0162489	0.0185487	0.0196055	0.0200065	0.0202823	0.0205397	0.0210927	0.0217099	0.0217011	0.0224306	0.0231974	0.0243662	0.0247938
70474561		0.00481617	0.00626294	0.00723725	0.00682592	0.00704705	0.00814135	0.0101101	0.0126905	0.0151572	0.016674	0.017065	0.0167006	0.0186695	0.0210386	0.0249073	0.028838	0.0319894	0.0351961	0.0359006	0.0341248	0.0311344	0.0290176	0.0252669
70474701		0.0029698	0.00218668	0.00185863	0.00348097	0.00632035	0.0108147	0.0154242	0.021856	0.0230762	0.0284572	0.0320114	0.0323595	0.0298271	0.0263595	0.0248622	0.0293143	0.0305854	0.0353185	0.0354164	0.0323484	0.029687	0.0239916	0.0193828	0.0138956
70474868		0.00413335	0.00410369	0.00423473	0.00482803	0.00626216	0.00790163	0.0108428	0.0138255	0.0162449	0.0180827	0.0196956	0.0212369	0.0221623	0.0218213	0.0205516	0.0200765	0.020545	0.0220398	0.024072	0.0249332	0.02427	0.0233476
70476543		0.00658139	0.00701433	0.00746924	0.0107525	0.00901097	0.0111916	0.015294	0.0150228	0.0202461	0.021489	0.0232388	0.0234818	0.0233924	0.0216065	0.0192613	0.0159978	0.0132693	0.0127383	0.0130029	0.0145729	0.0154209	0.0163976	0.017602	0.0174339	0.015765
70476613		0.00200513	0.00203517	0.00228981	0.00280013	0.00384758	0.00551239	0.00762479	0.0100379	0.0125903	0.0149963	0.0177669	0.0194762	0.0214769	0.0234954	0.0249187	0.0259235	0.0265577	0.0274161	0.0281272	0.0278278	0.026487	0.0241889	0.0230482
70477227		0.00246479	0.00302786	0.00288763	0.00350198	0.00368739	0.00408086	0.0045109	0.00476213	0.00494159	0.00511908	0.00530084	0.00559808	0.00582052	0.00612678	0.00693955	0.00846406	0.0100836	0.010638	0.0123546	0.0145973	0.0170725	0.0190921	0.021118	0.0215773	0.0212417	0.020453	0.0202045	0.0199874	0.0202403	0.0218633
70478078		0.00433035	0.00412934	0.00365159	0.00278443	0.00209847	0.00174913	0.00294691	0.003676	0.00418278	0.00456992	0.00490675	0.00545346	0.00651785	0.00795349	0.00988478	0.0125337	0.0158116	0.0193019	0.0201095	0.0210506	0.0221842	0.0227275	0.0225023	0.0220622	0.0227349	0.0233673	0.0239843	0.0230473	0.022216	0.0210112
70478455		0.00429839	0.00370671	0.00335689	0.00321882	0.00330624	0.0028262	0.00285912	0.00285772	0.0026596	0.00277678	0.00478486	0.00696401	0.0094097	0.0118091	0.0136614	0.0146277	0.0180167	0.0186518	0.0171105	0.0188194	0.0207889	0.0232449	0.0248203	0.0248461	0.0241438	0.0238022	0.0242764	0.0246497	0.0242108	0.0231819
70478902		0.000666484	0.00104289	0.00191131	0.00260127	0.00373911	0.00502529	0.00690348	0.00832283	0.0113551	0.0145502	0.0164611	0.0174406	0.0175892	0.0174181	0.0174696	0.0182246	0.0195834	0.0211048	0.020842	0.0228547	0.0237534	0.0220864	0.0194291	0.0175437	0.0165799	0.0162923
70479683		0.0049712	0.00544016	0.00598564	0.00646224	0.00696262	0.0074198	0.00772577	0.00801911	0.00841205	0.00986982	0.0124716	0.0144564	0.0154691	0.0162631	0.0178018	0.0189776	0.0193873	0.0210717	0.022928	0.0229164	0.0234505	0.0227805	0.0246404	0.0262285	0.0267573	0.0260544	0.0250327
70480130		0.00187136	0.00238069	0.00483335	0.00711776	0.00813235	0.0112387	0.0131864	0.0143902	0.0152803	0.0184038	0.0204626	0.0235979	0.0258054	0.0247965	0.0260637	0.026164	0.0277001	0.0260134	0.0242302	0.0218486	0.0199799	0.0174655	0.0154576	0.0139588
70480297		0.00216301	0.0016822	0.00118429	0.00107267	0.00153378	0.00275928	0.00466725	0.00609378	0.0094634	0.0126291	0.0146008	0.0151894	0.0153797	0.0166799	0.0194402	0.0242574	0.0256614	0.0263694	0.0255678	0.0240874	0.0224597	0.021285	0.0203687	0.0188148	0.0176867	0.0152353	0.0137408	0.0123033
70480507		0.0030228	0.00363122	0.0042664	0.00518529	0.00654381	0.00874413	0.0104093	0.0112425	0.0116899	0.0129457	0.0144999	0.0155185	0.0154349	0.0159693	0.0162576	0.0180147	0.018317	0.0185136	0.0191763	0.0192457	0.0194132	0.0201998	0.0210514	0.0214283	0.0205653	0.0193285	0.0176215	0.0157338	0.0137511	0.01171
70481358		0.0045572	0.00456914	0.00457378	0.00409704	0.00407029	0.00393928	0.00375333	0.003976	0.00471757	0.00568436	0.00743114	0.00954746	0.0121905	0.0155614	0.0186893	0.0205452	0.0213464	0.0217346	0.0223726	0.0234105	0.0240955	0.0244119	0.0247862	0.025438	0.0245371	0.0242265
70481665		0.00195179	0.00321275	0.00413844	0.00434783	0.00399589	0.00346786	0.00344721	0.00450901	0.00661051	0.00965242	0.0135883	0.0170147	0.0194661	0.0204478	0.0210558	0.0224983	0.0250776	0.0262052	0.0260716	0.0250858	0.0234945	0.0230255	0.0233664	0.0233882	0.0236641	0.0221788	0.0198761	0.016644	0.0141341
70483410		0.00796032	0.00668593	0.00686222	0.00727643	0.00763398	0.00779407	0.00787647	0.00778346	0.0078133	0.00784438	0.00796963	0.00792179	0.00801032	0.00872892	0.0098002	0.0108631	0.0118912	0.0130233	0.0141894	0.0154683	0.0165847	0.0174936	0.0183967	0.0174566	0.0179132	0.0168385	0.0170361	0.0163434	0.0165534	0.0173103
70483647		0.00412085	0.00473229	0.00810463	0.00991824	0.0123673	0.0137405	0.016591	0.019097	0.0213537	0.0232463	0.026168	0.0287763	0.0293935	0.0285011	0.0259039	0.0229	0.0217538	0.0215988	0.021506	0.0203867	0.0209346	0.0211683	0.0187763	0.0180076	0.0165949	0.0151254
70483884		0.00119368	0.00210821	0.00264173	0.00355185	0.00416513	0.00432446	0.00418952	0.00437038	0.00528936	0.00704374	0.00933177	0.0118993	0.0146786	0.0174423	0.0196322	0.0209302	0.021317	0.0215599	0.0219699	0.0234628	0.0245501	0.026172	0.0287986	0.0303329	0.0292388	0.0280501
70484191		0.00582594	0.00516357	0.004881	0.00544968	0.00720903	0.0101577	0.0139374	0.017727	0.0204613	0.0218277	0.0227511	0.0198276	0.0223287	0.0201652	0.0199875	0.0198213	0.0202959	0.0194696	0.0185438	0.0177012	0.0176511	0.0174746
70484261		0.00154047	0.00219028	0.00281719	0.00302353	0.00325058	0.00331596	0.00304683	0.0026361	0.00262986	0.00323529	0.00458789	0.00710563	0.00728511	0.0130317	0.0157605	0.0178657	0.0194247	0.020416	0.0192972	0.0193498	0.0188901	0.0187802	0.0182124	0.0184084	0.0195929	0.0225058	0.024569	0.0251676
70484638		0.00228725	0.00286767	0.00407587	0.00527835	0.00557443	0.00597922	0.0061184	0.00646198	0.00660332	0.00676266	0.00693744	0.00731981	0.00831733	0.0103903	0.0127707	0.0134822	0.01525	0.0185458	0.0224735	0.0251569	0.0264798	0.0297121	0.0307856	0.030629	0.0302646
70484875		0.00263341	0.00207786	0.0015046	0.000867914	0.000442988	0.000730018	0.000621672	0.00102451	0.00205666	0.00312881	0.00491676	0.00550208	0.00931923	0.0121201	0.0146789	0.0155967	0.017737	0.0195663	0.0217431	0.0197058	0.0223237	0.0224682	0.0208237	0.0176896	0.0150758	0.0146851	0.0150171	0.0168932	0.0185354	0.0202272
70485015		0.00273872	0.00199715	0.0016488	0.0018	0.00187028	0.0020043	0.0034367	0.0055815	0.00812685	0.00998943	0.011388	0.0126904	0.0148025	0.0167623	0.0179912	0.0185304	0.0190887	0.0206103	0.0227574	0.0245425	0.0263766	0.0268134	0.0282924	0.0280492	0.0263987	0.0250576	0.0221968	0.0194886
70485489		0.00531938	0.00524864	0.00460927	0.00388137	0.00351782	0.00282847	0.00351719	0.00299284	0.00236073	0.00203718	0.00237647	0.00262312	0.00326245	0.00419706	0.00530079	0.00670342	0.00821357	0.0117467	0.0131103	0.0143542	0.0161921	0.0200698	0.0215604	0.0241267	0.0246738	0.0231785	0.0222369	0.0218479	0.02234	0.0239028
70485796		0.00276612	0.00360272	0.00397403	0.00428958	0.0046867	0.00489095	0.00591454	0.00738391	0.00885694	0.0099761	0.0110901	0.0137359	0.0169986	0.0197087	0.0221514	0.0234905	0.0247741	0.0232708	0.0230452	0.0230384	0.0225006	0.0216085	0.0208906	0.0198054	0.0179188	0.0167661	0.0157997
70485866		0.00330547	0.00300062	0.00275966	0.00245247	0.00209057	0.00191934	0.00117781	0.00192693	0.00256942	0.00316878	0.00382756	0.00449515	0.00501866	0.00656431	0.00705115	0.00785757	0.00911466	0.0106426	0.0120648	0.0137409	0.015932	0.016175	0.015791	0.0160301	0.0158679	0.017032	0.0195515	0.0214561	0.0227184	0.0220516
70486173		0.00336371	0.00323704	0.00256777	0.00208406	0.00143171	0.00233404	0.00245448	0.00286387	0.00312381	0.00335594	0.00418916	0.00538896	0.00657003	0.00717018	0.00895079	0.0108453	0.013245	0.0136501	0.0139407	0.0146106	0.0151289	0.0160022	0.0172159	0.0188279	0.0206132	0.0219172	0.022067	0.0219482	0.0222685	0.02236
70486787		0.00226389	0.00211863	0.0015605	0.0018806	0.00206271	0.00308389	0.00456874	0.0064675	0.00886221	0.0116346	0.0144176	0.0169218	0.0191998	0.0215483	0.0209636	0.0216946	0.0197017	0.0184522	0.0178276	0.0171967	0.0171745	0.0173911
70487094		0.0038752	0.00375323	0.00375679	0.00450836	0.00421902	0.0047325	0.00484488	0.00479681	0.00455184	0.00423018	0.00383029	0.00384131	0.00544154	0.00689519	0.010831	0.015224	0.018175	0.0223562	0.0254298	0.0272413	0.0297373	0.03223	0.0327949	0.0313015	0.0260098	0.0205229
70487304		0.00503598	0.00578549	0.00551169	0.00508484	0.00489806	0.00506444	0.00548236	0.00600683	0.00665049	0.00703074	0.00808111	0.00872731	0.00988979	0.0114577	0.013062	0.0144696	0.0183387	0.0212097	0.0229916	0.0233899	0.0240654	0.0253428	0.0266167	0.0261195	0.0250671
70487471		0.00197111	0.00216468	0.00245413	0.00291594	0.00353852	0.00423495	0.00499686	0.00604072	0.00761744	0.00834907	0.0120671	0.0160313	0.0194359	0.0217167	0.0225559	0.022431	0.0220755	0.0210551	0.0211126	0.0211898	0.0201938	0.0192156	0.0189937
70488155		0.00429026	0.00407771	0.00424724	0.0067657	0.00792924	0.012308	0.0164938	0.019446	0.0227047	0.0248951	0.0250357	0.024897	0.02483	0.0262926	0.0274857	0.0274848	0.0268369	0.0267156	0.0257257	0.0219502	0.0191125	0.0186592
70488225		0.00546818	0.00614366	0.00606964	0.00451602	0.00532448	0.00351637	0.0017018	0.00296146	0.00639306	0.00851538	0.0115791	0.0148923	0.0178416	0.0202979	0.0208722	0.0202551	0.0192553	0.0182631	0.017043	0.0157676	0.0152229	0.015464	0.0159926	0.017588	0.0199358
70489076		0.00492447	0.00471118	0.00460138	0.00459582	0.00459919	0.00445216	0.00381571	0.00263424	0.0018892	0.00375287	0.00714895	0.011445	0.0157345	0.0191416	0.0215188	0.023547	0.0251187	0.0268932	0.0295832	0.0317	0.0318255	0.0301715	0.028252	0.0258588	0.024703	0.0235868	0.0234647	0.0217766
70489383		0.00274083	0.00231069	0.00148148	0.000753923	0.000752488	0.0017264	0.00358092	0.00640657	0.00985034	0.0133762	0.0164253	0.0186302	0.0196704	0.0184825	0.0181366	0.0180916	0.0184998	0.0196377	0.0201724	0.0216757	0.0235343	0.0234377	0.0228944	0.0216355	0.0215832	0.0213302	0.0221526	0.0219412	0.021845	0.0207598
70489690		0.00394278	0.00433501	0.00472298	0.00544631	0.00682732	0.00890668	0.0114689	0.0140349	0.0162648	0.0154616	0.0181441	0.0198391	0.0228976	0.0248724	0.0262029	0.0275519	0.0274242	0.0285428	0.0289651	0.0270823	0.0254695	0.0218966	0.0195993	0.0191335	0.01974	0.0191612	0.0189769
70489760		0.00365284	0.00445605	0.00586389	0.00757342	0.00851116	0.0101964	0.0123983	0.0132399	0.0158799	0.0189272	0.0199528	0.0191006	0.0192277	0.0204349	0.0207659	0.0202772	0.0194884	0.0186661	0.0175867	0.0175433	0.0167428	0.0153203	0.0138637	0.0122608	0.0105936	0.00928279
70489830		0.0024737	0.00253319	0.00321885	0.00340507	0.00394793	0.00455307	0.00536517	0.00741389	0.00966062	0.0118011	0.0137399	0.0157912	0.0193911	0.0227413	0.0241534	0.0251295	0.0255502	0.0262805	0.02833	0.0300634	0.031233	0.0327618	0.030834
70490137		0.00433812	0.00351423	0.00264276	0.00210354	0.00179952	0.00162192	0.00131928	0.00137773	0.00208927	0.00246588	0.00426674	0.00691036	0.00990344	0.0135426	0.0147777	0.0173642	0.0194367	0.0204677	0.0205218	0.0215974	0.0229762	0.0264236	0.029437	0.030381	0.028776
70492286		0.00352555	0.00467698	0.00618033	0.00788201	0.0099913	0.012857	0.0160683	0.0190392	0.0209578	0.0229116	0.0242868	0.0253891	0.0258103	0.0269241	0.0268758	0.0266504	0.0269224	0.0287232	0.0301508	0.0291213	0.0279208	0.025657	0.02316
70492593		0.00479262	0.00462452	0.00444621	0.00421427	0.00402862	0.00400269	0.0041975	0.00483394	0.00480947	0.00473794	0.00493912	0.00575643	0.00645654	0.00845935	0.0101793	0.0117884	0.013327	0.0141232	0.0148784	0.016183	0.0173209	0.0174315	0.0186937	0.0193055	0.0205426	0.0213189	0.0221804	0.0219211	0.02228	0.0221089
70492970		0.00239531	0.00330343	0.00494034	0.00650991	0.00787124	0.00892117	0.0094316	0.0099176	0.00967982	0.0100814	0.0110462	0.0123581	0.0145632	0.0173346	0.0192997	0.0204483	0.0209392	0.0209001	0.0202821	0.0193912	0.0172302	0.0164764	0.0167188	0.0181822	0.0200066
70493417		0.00235945	0.00208665	0.00180348	0.000878315	0.00239019	0.00377697	0.00440982	0.00478756	0.00593754	0.00771571	0.0103696	0.0134249	0.0170689	0.0195414	0.0220843	0.0244806	0.0272094	0.0294717	0.0289882	0.0257328	0.0242718	0.022923	0.0207578	0.018543
70493654		0.00364212	0.00361885	0.00353893	0.00352461	0.00309451	0.00237693	0.00136743	0.000998873	0.0008987	0.00148288	0.0027643	0.00485298	0.00737775	0.00727776	0.00904725	0.0103767	0.0116647	0.0133805	0.0153556	0.0167031	0.0170337	0.0171945	0.017885	0.019996	0.0216629	0.0228255	0.0249829	0.026031	0.0268394	0.0272662
70493891		0.00312984	0.00355015	0.00393224	0.00397878	0.00380171	0.00391414	0.00431164	0.00441643	0.00401212	0.00322392	0.00260536	0.00302101	0.00427853	0.00665479	0.00882243	0.0110014	0.0128028	0.0151129	0.0181401	0.0207377	0.0214921	0.0178936	0.0152159	0.0145125	0.0157165	0.0199487	0.0245084
70493961		0.00716561	0.00621638	0.00509828	0.00384448	0.00251038	0.00188373	0.00197102	0.00250006	0.00285135	0.00324223	0.00453893	0.00595266	0.00712809	0.00827219	0.00796145	0.00886234	0.0103512	0.0116215	0.0118193	0.0110943	0.0103374	0.0104822	0.0111889	0.0117783	0.0130876	0.0155754	0.0197222	0.0234462	0.0238159	0.0236906
70494338		0.00780039	0.00779935	0.00781056	0.00786436	0.00712383	0.0045866	0.00149194	0.00250808	0.00554547	0.0080765	0.0100076	0.0116038	0.00969803	0.011237	0.0130931	0.0152652	0.0165701	0.016968	0.0178769	0.0181666	0.0186085	0.0174722	0.0171701	0.0163726	0.0166216	0.0197167	0.0226252	0.0243343	0.0248984	0.0250162
70494575		0.00168913	0.0023933	0.00341394	0.0046456	0.00552038	0.00629812	0.00742756	0.00882655	0.0103108	0.0118768	0.0144863	0.0179166	0.0203768	0.0234136	0.0237939	0.0247165	0.02316	0.021936	0.0196066	0.0180775	0.0179294
70494715		0.003086	0.00364846	0.00434207	0.00482407	0.004893	0.00481404	0.00536728	0.00687718	0.0117577	0.0147016	0.0152419	0.0204856	0.0226467	0.0227445	0.0208319	0.0186905	0.0172856	0.0171381	0.018417	0.0193033	0.0196725	0.0192533	0.0191345
70496320		0.00120426	0.0015609	0.00321924	0.00459336	0.00538347	0.00524131	0.00424931	0.00310562	0.00372355	0.0060304	0.00580758	0.00826596	0.0104738	0.0124932	0.0148243	0.0174728	0.0224025	0.025287	0.0267557	0.0256491	0.0227064	0.0203563	0.0208504	0.018589	0.0188564	0.0206185	0.0218378
70496627		0.00391695	0.00408332	0.00405847	0.00368528	0.00326252	0.00336731	0.00438816	0.0057961	0.00698913	0.00778506	0.00825198	0.0092027	0.011275	0.0139582	0.0152223	0.016815	0.0185889	0.0216869	0.023982	0.0251397	0.0250153	0.0248853	0.0239393	0.0228927	0.0215852	0.0207261	0.0199207
70496864		0.00547404	0.00443468	0.00316924	0.00192212	0.00103071	0.00101521	0.00156672	0.00178186	0.00268034	0.00393149	0.00478857	0.00528266	0.00669622	0.00822162	0.0103243	0.0129336	0.0158929	0.0191421	0.0227091	0.0263512	0.0295614	0.032043	0.0327057	0.0303535	0.0274855	0.0251762	0.0241677	0.0249787	0.025007	0.0246791
70497171		0.00303455	0.00362456	0.00420513	0.0042343	0.00489992	0.00505009	0.00511604	0.00477116	0.00424743	0.00495877	0.00693258	0.00842591	0.0107923	0.0118488	0.0142698	0.0161053	0.0174202	0.0189681	0.021343	0.023612	0.0235821	0.0222845	0.0215301	0.0217613	0.0225316	0.0206263
70497618		0.00124942	0.00182929	0.00169107	0.00212515	0.00287669	0.00397841	0.00449139	0.00555211	0.00780599	0.0106906	0.0138284	0.0161827	0.0183305	0.0204925	0.0220976	0.0232462	0.0227075	0.0222639	0.0214153	0.0195424	0.018511	0.0181119	0.0171674	0.0167925	0.016161
70497785		0.00457387	0.00470027	0.0048701	0.00436641	0.00426125	0.00385803	0.00368947	0.00366692	0.00399013	0.00483269	0.0051226	0.00498699	0.00554235	0.00602715	0.00767276	0.00985762	0.0121832	0.0156116	0.0170867	0.0188433	0.0210733	0.0220796	0.0218523	0.0207379	0.0207295	0.0206315	0.0208422	0.0212655	0.0212987	0.0217458
70499767		0.00232629	0.00261864	0.00286104	0.00314447	0.00332169	0.00330761	0.00318634	0.00298667	0.00268165	0.00218714	0.00170467	0.00325714	0.00429232	0.00674988	0.00907439	0.010408	0.011294	0.013103	0.0138427	0.0139207	0.0139207	0.0137285	0.0135629	0.0134102	0.0132429	0.0129354	0.0141108	0.0167669	0.0201672	0.0221017
70500758		0.00280823	0.00331726	0.00390584	0.00369322	0.00295133	0.00219638	0.0019879	0.00214727	0.00217457	0.00313602	0.00542244	0.00912429	0.0100262	0.0133022	0.0140691	0.0126282	0.0119113	0.0123011	0.0125194	0.0126976	0.0132053	0.0147066	0.0158072	0.0152486	0.0160529	0.0166174	0.0170543	0.0165303	0.0150155	0.0121763
70502056		0.00125579	0.000599392	0.00101113	0.0023153	0.00234912	0.00288672	0.00329165	0.00390187	0.00470942	0.0049991	0.00496479	0.0050181	0.00485463	0.00580234	0.00547341	0.00808329	0.0124439	0.011537	0.0134795	0.0172676	0.0189424	0.0198981	0.0193185	0.0210003	0.0217663	0.0230998	0.024436	0.0258063	0.0259409	0.0239235
70502433		0.0078626	0.00693209	0.00542472	0.00503855	0.0033977	0.00198104	0.00176922	0.00266221	0.00400987	0.00505376	0.00567957	0.00655285	0.0077416	0.00993432	0.012711	0.0146586	0.0164752	0.0188949	0.0203926	0.0191955	0.0200819	0.0211357	0.0237187	0.0256797	0.0275154	0.0280138	0.0268387	0.0256356
70502670		0.00597862	0.00536582	0.00435456	0.00380405	0.00366881	0.003839	0.00433924	0.00467641	0.004807	0.00479255	0.00424651	0.00384162	0.00348998	0.00332585	0.00335875	0.00361065	0.00408119	0.00478062	0.00532158	0.00550604	0.00671619	0.00765309	0.00802511	0.00865322	0.00868562	0.00784054	0.00906815	0.0106053	0.0151842	0.0208867
70503047		0.00242455	0.00302081	0.00408193	0.00496055	0.00549925	0.00557182	0.00561118	0.00516726	0.00439302	0.00382734	0.00406321	0.00546158	0.00772468	0.00724763	0.00853119	0.0120866	0.0159269	0.0193507	0.0221321	0.0240543	0.024585	0.0243379	0.0239491	0.0240922	0.0238401	0.0225232	0.022364	0.0221447	0.0216171
70503117		0.00303474	0.00272835	0.00242999	0.00278021	0.00291065	0.00334276	0.0034263	0.00322393	0.00299139	0.0031246	0.00415748	0.00557055	0.00839205	0.0116582	0.0146879	0.0172953	0.0175349	0.018595	0.0188385	0.0208728	0.0213195	0.0223605	0.0240767	0.0246334	0.0249216	0.0252989	0.0242777	0.0206039	0.0193675
70503591		0.00196059	0.0014149	0.00186098	0.0026785	0.00315962	0.00237184	0.00266461	0.00266347	0.0039506	0.00595003	0.00864883	0.0119964	0.0156333	0.0192075	0.0227615	0.0223672	0.0237642	0.0235147	0.0234776	0.0231378	0.0232032	0.0234365	0.0233264	0.0226192	0.0211677	0.0196729
70504108		0.00765073	0.00800129	0.00846425	0.00877422	0.00882279	0.00868812	0.00825382	0.00573692	0.00432105	0.00286114	0.00411621	0.00787748	0.0120624	0.0157611	0.0187111	0.0209636	0.0233673	0.0252453	0.0267075	0.0275416	0.0273159	0.0260511	0.0244201	0.0236133	0.0223656	0.0191869	0.0198777	0.0199062
70504652		0.00122815	0.00151113	0.00186976	0.00227765	0.0034341	0.00569709	0.0088168	0.0123142	0.0155013	0.0182842	0.0206102	0.0217822	0.0207295	0.0202594	0.0189049	0.017773	0.0168432	0.0155385	0.0147559	0.014692	0.0147913	0.0144073	0.0138423	0.0132052	0.0130246	0.0132952	0.0141652
70504722		0.00249169	0.00230084	0.00255333	0.00420331	0.00570251	0.0076319	0.00949602	0.0112795	0.0130085	0.0145826	0.0161337	0.0175133	0.0185536	0.0192368	0.0201062	0.0203353	0.0187313	0.0168859	0.0154661	0.015007	0.0159657	0.0170991	0.0175413	0.0171051
70505196		0.000242477	0.000683925	0.00133508	0.00209461	0.00326982	0.0047161	0.00605431	0.00558112	0.00631531	0.00754444	0.00924132	0.0113618	0.0152767	0.0174539	0.0179649	0.0206549	0.0215875	0.0225386	0.022838	0.0222957	0.0218338	0.0220501	0.0239111	0.0253615	0.026783	0.0279433	0.0284532	0.0276754
70505643		0.00439549	0.00396595	0.00303728	0.00279241	0.00308763	0.00356635	0.00483425	0.00466269	0.00630208	0.00903775	0.0130332	0.0141354	0.0164204	0.0187534	0.0204269	0.0219365	0.0229188	0.0234081	0.0233552	0.0241758	0.0240525	0.024672	0.0233789	0.0217111	0.0196419	0.0175277
70505880		0.00164315	0.00168374	0.00190611	0.00234866	0.00284602	0.00332206	0.00372054	0.00408614	0.00456928	0.0052606	0.00658478	0.00893468	0.012453	0.0164066	0.019453	0.0213839	0.0224373	0.0231306	0.0237822	0.0242725	0.0237144	0.0230271	0.0221316	0.0219825	0.0214397	0.0209907	0.0202086	0.0194845	0.018392
70506704		0.00104288	0.00199211	0.00361859	0.00598903	0.00888527	0.0121439	0.0153469	0.0177852	0.0198439	0.0217304	0.0227721	0.02221	0.0213062	0.0209137	0.0205263	0.021022	0.0221817	0.0225414	0.0226648	0.0217939	0.0211494
70507178		0.00311505	0.00258356	0.00217113	0.00169563	0.00093295	0.000699895	0.00126694	0.0020203	0.0032038	0.00435581	0.00585054	0.00691748	0.00831617	0.0103702	0.0129153	0.0154105	0.0175112	0.0190192	0.0197464	0.0211056	0.0233388	0.0255785	0.0251734	0.0225768	0.0185326	0.0159113
70507248		0.00496296	0.00637058	0.00585676	0.00773997	0.0104728	0.0130845	0.0152771	0.0178191	0.0201417	0.0206411	0.021186	0.0242179	0.0216413	0.0225298	0.0205332	0.0199826	0.0207612	0.0209773	0.0206508	0.0206549	0.0190548	0.0179878	0.0167137	0.016382	0.0153901
70507485		0.00483554	0.0042881	0.00358158	0.00341865	0.00255699	0.00158679	0.00112393	0.0011002	0.00108045	0.00131416	0.00171094	0.00241677	0.00293879	0.00504588	0.00711131	0.00818321	0.0105047	0.0142025	0.0157961	0.0160606	0.0179341	0.020258	0.0223884	0.0234891	0.0232283	0.0228485	0.0219546
70507792		0.00260411	0.00284513	0.00347704	0.0043691	0.00528872	0.00622562	0.00748125	0.0094362	0.0119894	0.0147272	0.0177913	0.0209529	0.0237112	0.0259172	0.0266983	0.0264227	0.0245816	0.0235114	0.023276	0.0239267	0.0235978	0.0222746	0.0218921	0.0206306	0.0184019
70507862		0.00224621	0.00228986	0.00359966	0.0033366	0.00300118	0.00344735	0.00488806	0.00701578	0.00930529	0.0115684	0.0137579	0.0158439	0.0178626	0.0197549	0.0211913	0.0225637	0.0235205	0.0234138	0.0225013	0.0207662	0.021676	0.0202639	0.0212069	0.0197688	0.0188703
70508853		0.0023669	0.00258501	0.00279599	0.00298229	0.00333149	0.00383929	0.00486214	0.00622919	0.00815773	0.00942455	0.0104296	0.0119895	0.0142437	0.0184743	0.0201871	0.0213264	0.0215869	0.0225764	0.0244346	0.0263416	0.0276124	0.0262536	0.0233389	0.0209139	0.020017	0.0190725	0.0186482
70509230		0.00369688	0.00424043	0.00487966	0.00524097	0.0051856	0.00500624	0.00525395	0.00664796	0.007627	0.00791893	0.00814439	0.00858362	0.0098705	0.0118126	0.0136718	0.0160081	0.017887	0.0195961	0.0211183	0.0224343	0.0235496	0.0240611	0.022961	0.021526	0.0201761	0.0198397	0.0207516	0.0217817	0.0223082
70509537		0.00484119	0.00489161	0.00298354	0.00282396	0.00257964	0.00230435	0.00220432	0.0023594	0.00269161	0.00387665	0.00543613	0.00785356	0.00972369	0.0109446	0.0134247	0.0166332	0.020179	0.0232783	0.0249532	0.0240429	0.0224011	0.0213523	0.0211506	0.0204016	0.019049	0.0182781	0.0184102	0.0182684	0.0192746
70510221		0.00230904	0.00207067	0.00171625	0.00218031	0.00313598	0.00352076	0.00345397	0.00347992	0.00356025	0.00408041	0.0054352	0.00724902	0.00949456	0.0115365	0.0144006	0.0166294	0.019525	0.0223453	0.0246615	0.0262353	0.025807	0.0247934	0.0246318	0.0239941	0.0240682	0.0248332	0.0266686	0.0274193	0.0250751	0.0210049
70510835		0.00248488	0.00267578	0.0029673	0.00321709	0.0033391	0.00328219	0.00287092	0.00256595	0.00226965	0.00255018	0.00375668	0.00600359	0.00859357	0.0115253	0.0144885	0.0185814	0.0210421	0.0232744	0.0249568	0.026723	0.0273802	0.028129	0.0277158	0.0278582	0.0285321	0.0281492	0.0261421	0.0258319	0.0229767	0.0210739
70511379		0.00386487	0.00528978	0.00670884	0.00846517	0.0107016	0.0134334	0.0163502	0.0187794	0.0202698	0.0213879	0.0215068	0.0210161	0.0203661	0.0189863	0.0174928	0.0165212	0.0164869	0.0169957	0.0171916	0.0181638	0.0184015	0.0172832	0.0192348	0.018693	0.016655
70511519		0.00113436	0.00215976	0.0025623	0.00282777	0.00297408	0.00400016	0.00450474	0.00581677	0.00764242	0.00728092	0.00919033	0.0109844	0.0125965	0.0137955	0.0155881	0.0170187	0.0177019	0.0177568	0.0189544	0.0200526	0.0231474	0.0262988	0.0299275	0.0312577	0.030438	0.0295215	0.0288917	0.0278654	0.0269154	0.0247477
70511686		0.0032096	0.00364743	0.00392254	0.00394679	0.00373479	0.00350127	0.00402363	0.00641007	0.0107463	0.0143055	0.0174231	0.019956	0.0220703	0.023009	0.0229415	0.0233437	0.0242212	0.0252451	0.0260546	0.0264781	0.0260531	0.0257204	0.0258917	0.0252922	0.0238293	0.0219555	0.0200614
70512063		0.00355522	0.00380142	0.00399753	0.0040167	0.00386849	0.00400647	0.00476495	0.00609849	0.00795572	0.0106022	0.0143051	0.018352	0.022119	0.0248163	0.0256248	0.0246868	0.023559	0.0224917	0.022775	0.0234361	0.024921
70512133		0.00358486	0.00256196	0.00213114	0.00224465	0.00259276	0.00318884	0.00421183	0.0056135	0.00696701	0.00796885	0.00896215	0.0105816	0.0115474	0.0125858	0.0128989	0.0130016	0.01321	0.0134653	0.0134347	0.0138936	0.0148149	0.0155787	0.0166375	0.0183117	0.019783	0.0213161	0.0220205
70512370		0.00137908	0.00156539	0.0014591	0.00167436	0.00159923	0.00155295	0.0015395	0.00220776	0.00369601	0.005784	0.00812851	0.0103864	0.0125194	0.0147141	0.016885	0.0188043	0.0207781	0.0228715	0.0241028	0.0254504	0.0258972	0.0269441	0.0263662	0.0266379	0.0249	0.0221421	0.0215834	0.0200749	0.0202096	0.0207147
70513054		0.00219405	0.00200586	0.00228525	0.0025822	0.00296351	0.00329108	0.00388741	0.00395037	0.00402758	0.00496048	0.00555018	0.00579955	0.00615076	0.00746774	0.00865841	0.0107921	0.0137045	0.0159919	0.0195857	0.0194358	0.0191475	0.0219477	0.0236851	0.0255452	0.0261586	0.0257	0.0253289	0.0240608	0.0223638	0.0197823
70513668		0.00254424	0.00215904	0.00200565	0.00224205	0.00219224	0.0023709	0.00242547	0.00305784	0.00370465	0.00417293	0.00434137	0.00416579	0.00420164	0.00499054	0.00587103	0.00664329	0.00693514	0.00806662	0.0109445	0.0147391	0.0195588	0.0242866	0.0265032	0.0271301	0.0274385	0.0265728	0.0259766	0.0249515	0.0224555
70514045		0.00221314	0.00458908	0.00572448	0.00682303	0.00791613	0.00902701	0.0101089	0.0140816	0.0152974	0.0167538	0.0183671	0.019688	0.0203357	0.0210075	0.0207239	0.0216797	0.0205059	0.0214603	0.0212874	0.0200043	0.0197275	0.0206322	0.0212234	0.0219044	0.0231671	0.0231162	0.02214	0.0203648
70514896		0.00346424	0.00218941	0.00265515	0.00226546	0.0021071	0.00220464	0.00237084	0.00237509	0.00240895	0.00394745	0.00646305	0.0101664	0.0140423	0.0136006	0.0167314	0.0201296	0.0252764	0.0295027	0.0326234	0.0342886	0.0333804	0.0318886	0.0309915	0.0288746	0.0280332	0.0269963	0.0245858
70514966		0.00485595	0.00557652	0.00514962	0.0049707	0.0038391	0.00442526	0.00458438	0.00491445	0.00692526	0.00906807	0.0114046	0.013929	0.0166317	0.0147106	0.0187042	0.0214621	0.0225209	0.0228804	0.0254661	0.0267948	0.0308071	0.0315218	0.0327148	0.0375926
70515036		0.00131945	0.00159058	0.00178191	0.00182989	0.00138739	0.00138156	0.00141221	0.00141432	0.00145398	0.00184661	0.0026	0.00347985	0.00428866	0.00609614	0.00601818	0.00709737	0.00974063	0.0129725	0.0172224	0.0180899	0.0205749	0.0221186	0.0220268	0.0214332	0.0205477	0.0204627	0.0206994	0.0210459	0.0208561
70515273		0.00137826	0.000771475	0.000967475	0.00114794	0.00162533	0.00229975	0.00302695	0.00365314	0.00421719	0.00489866	0.00578461	0.00694596	0.00847655	0.0104702	0.012971	0.0159505	0.0175835	0.0191163	0.0193866	0.0207594	0.0214401	0.0212362	0.021964	0.0210867	0.0220332	0.0203253	0.0194204	0.0186364
70515343		0.0016569	0.00217667	0.00223184	0.00223078	0.00232328	0.0026669	0.00334471	0.00466625	0.0068117	0.00983693	0.0135154	0.0171217	0.0198626	0.0182315	0.0196206	0.0207208	0.0216748	0.0219917	0.021562	0.0205427	0.0197006	0.0203642	0.0201381	0.0204989	0.020827	0.0206788	0.0207229	0.0204485
70515580		0.00267105	0.00204738	0.00195758	0.00217476	0.00251769	0.0027152	0.0030424	0.00358892	0.0038592	0.00412215	0.00514203	0.00658968	0.00801729	0.00973031	0.0117192	0.0139513	0.0160738	0.0177143	0.0198897	0.0221491	0.0241466	0.0252283	0.0248623	0.0239042	0.0225457	0.0216927	0.0231314	0.022319
70515720		0.0048875	0.00542781	0.00614037	0.00676722	0.0068051	0.00616061	0.00564338	0.00627632	0.00856438	0.0123366	0.0162944	0.0197144	0.0223224	0.0239817	0.0242023	0.0236473	0.0243041	0.0234995	0.024586	0.0247613	0.0247543	0.0238599	0.0227699
70516194		0.00165417	0.000592743	0.00156288	0.00204974	0.00362418	0.00546077	0.00726617	0.00805054	0.0079349	0.0109592	0.0140118	0.0164338	0.0184887	0.0209473	0.0222378	0.021754	0.0193088	0.0199807	0.0213225	0.0239034	0.0270621	0.0274698
70516334		0.00251139	0.00318713	0.00376624	0.00467646	0.00828414	0.00814072	0.0115769	0.0145238	0.0153745	0.0162536	0.018149	0.0161994	0.0196433	0.0206319	0.0225786	0.0252219	0.0262321	0.0271636	0.0266049	0.0256138	0.021543	0.0187877	0.0165878	0.0143387
70516571		0.00239741	0.00250227	0.00270525	0.00257878	0.00314803	0.00431334	0.00603095	0.0117964	0.0137639	0.0157372	0.0180714	0.0217507	0.0256965	0.0285068	0.0291869	0.0279039	0.025166	0.0228172	0.0218961	0.0216296	0.0227954	0.0235736	0.0249842	0.0250754	0.0246915	0.0236066
70516878		0.00412537	0.00457948	0.00474148	0.00520038	0.0059547	0.00690818	0.00765234	0.00823026	0.00900204	0.0100864	0.0124139	0.0148698	0.0161042	0.0177135	0.0194835	0.02093	0.022061	0.0229795	0.0236003	0.0232123	0.0231029	0.0228845	0.0224215	0.0219476	0.0205416
70518316		0.00132749	0.00214667	0.00282565	0.0033118	0.00284528	0.00334371	0.00390162	0.00472458	0.00570134	0.00670567	0.00784091	0.0111641	0.0119156	0.0134224	0.0151397	0.0172416	0.0191077	0.0206247	0.0216574	0.0221027	0.0230313	0.0244432	0.0256135	0.0259798	0.0264521	0.0261698
70518553		0.00336146	0.00324529	0.00329209	0.00378348	0.00450726	0.00510384	0.00523944	0.00503594	0.00483953	0.00479294	0.00472024	0.00498275	0.00599408	0.00802703	0.0104583	0.0128013	0.0151116	0.0181414	0.0179834	0.0211868	0.0223054	0.0192385	0.0203978	0.0188124	0.0196947	0.0206953	0.0224444	0.0238348
70518860		0.00737582	0.00778439	0.00843116	0.00952448	0.0115316	0.0145165	0.0180561	0.0218906	0.025825	0.0291225	0.0307259	0.0304092	0.0284218	0.0266488	0.0253114	0.0235885	0.0233507	0.0214919	0.0197822	0.0189342	0.0167781
70519167		0.0048054	0.00498064	0.00524152	0.00538158	0.00596628	0.00697594	0.00849178	0.0107729	0.0138337	0.0175767	0.0211736	0.0235519	0.0247828	0.0251178	0.0249712	0.0241787	0.0230636	0.0225347	0.0206341	0.020665	0.0188915	0.0195773	0.0180886
70519474		0.00197994	0.00235643	0.00248358	0.00227947	0.00195269	0.0023347	0.00326023	0.00450693	0.00605454	0.0078803	0.00981277	0.0116082	0.0131808	0.0145297	0.015349	0.0177934	0.0213483	0.0229266	0.0264511	0.0287843	0.0289989	0.0276858	0.0264044	0.0257877	0.0259748	0.0256697
70519781		0.00388677	0.003636	0.00538031	0.00657079	0.0082359	0.0101354	0.0122466	0.0145117	0.016819	0.0179309	0.0183394	0.0183093	0.0186625	0.0198727	0.022469	0.024589	0.0242333	0.0218076	0.0208416	0.0185537	0.0171645	0.0177316	0.0180623	0.0185495	0.0189874	0.0193379	0.0190991
70520228		0.00510586	0.00485183	0.00424503	0.00356412	0.00298912	0.00421008	0.00477332	0.00535448	0.00577968	0.00584618	0.00565505	0.00689366	0.00802396	0.00917394	0.010446	0.0120461	0.0146997	0.0171827	0.0202021	0.0209658	0.0214284	0.0220936	0.0225027	0.02308	0.0237408	0.0231444
70520605		0.00214924	0.00253426	0.0034304	0.00449164	0.00653875	0.00944339	0.0130785	0.0168534	0.0200517	0.0221225	0.0222128	0.0233564	0.0235127	0.0216914	0.0193742	0.0170632	0.0158156	0.015609	0.0162592	0.0173834	0.0172072	0.0169413	0.0161516	0.0157118
70520842		0.0033614	0.00289317	0.00298599	0.00314659	0.00378843	0.00456218	0.00525024	0.00584577	0.00639232	0.00714136	0.00804725	0.00948805	0.0112474	0.0131458	0.015027	0.0172895	0.0193296	0.0203963	0.0208126	0.0208328	0.021881	0.0235207	0.0255563	0.0256652	0.025952
70521079		0.00456631	0.00373467	0.00340276	0.00291973	0.00270993	0.00260301	0.00231946	0.00175755	0.00153573	0.00304331	0.00588839	0.00976619	0.0107643	0.0156401	0.0194612	0.0224796	0.0239323	0.0244623	0.0239454	0.0242878	0.0261615	0.0267449	0.0276687	0.0284588
70521149		0.00260093	0.00326667	0.00377952	0.00411973	0.0042848	0.00434999	0.00460229	0.00479152	0.00409712	0.00497068	0.00602971	0.00794608	0.00804669	0.0101569	0.0127732	0.0129484	0.0162489	0.0185487	0.0196055	0.0200065	0.0202823	0.0205397	0.0210927	0.0217099	0.0217011	0.0224306	0.0231974	0.0243662	0.0247938
70521763		0.00256255	0.00221356	0.00199518	0.00164814	0.002514	0.00515965	0.00765533	0.00888062	0.0121333	0.012711	0.0171188	0.0199637	0.0217352	0.0227192	0.0229153	0.024312	0.0258911	0.0279457	0.0283785	0.0278199	0.0276379	0.0279007	0.0281806
70521833		0.00316873	0.00263406	0.00263231	0.00210216	0.0017647	0.00157658	0.00150616	0.00140157	0.0016699	0.00195112	0.00305549	0.00413716	0.00615904	0.00885258	0.0108469	0.0139632	0.0145044	0.0168081	0.0178217	0.0201792	0.0225473	0.0239841	0.0225506	0.0232682	0.0241977	0.0249934	0.023866	0.0227855	0.0204715	0.0194833
70522517		0.00213313	0.00237051	0.00261265	0.00270425	0.00251245	0.00229216	0.00226825	0.0021565	0.00262453	0.00370723	0.00486193	0.00584783	0.00681438	0.00827938	0.0109412	0.0145398	0.0175272	0.0203733	0.022165	0.023035	0.023836	0.0246407	0.0238956	0.0232295	0.0224145	0.0207561	0.0193738	0.0191817	0.0198365
70522684		0.00592754	0.00461299	0.00436579	0.00354142	0.00252437	0.00224511	0.00219213	0.0032516	0.0044803	0.00580234	0.00723255	0.0086738	0.0100626	0.0114508	0.0128756	0.0142151	0.0145932	0.0156319	0.0166923	0.0177504	0.0176986	0.0168511	0.0148592	0.0135996	0.0140031	0.0155756	0.015115
70522754		0.00207499	0.00249178	0.0027579	0.00291632	0.00338273	0.00358068	0.00397743	0.00456741	0.00582086	0.00808965	0.0112019	0.0146291	0.0178993	0.0211198	0.0243026	0.0276994	0.0290963	0.0307901	0.0319703	0.0312546	0.0305384	0.0301542
70523061		0.0024234	0.00519891	0.00729962	0.00980054	0.0125382	0.0149908	0.0170347	0.0183864	0.0188772	0.021953	0.0224627	0.0230426	0.0228974	0.023835	0.0245258	0.0257671	0.0274846	0.0287777	0.0275935	0.0251215	0.0226845	0.019759	0.0180903	0.0178136	0.0186464	0.0186775	0.0174275	0.0155562	0.014155
70523131		0.00276428	0.00299691	0.0036703	0.0041752	0.00432419	0.00448415	0.00506672	0.00587165	0.00765214	0.00932604	0.00986128	0.0116005	0.0135495	0.0154968	0.0179935	0.0192765	0.0206142	0.0229527	0.0243072	0.0244037	0.023887	0.0247974	0.0239351	0.0236506	0.024596	0.0236649
70523201		0.00446104	0.00400361	0.00421066	0.00436382	0.00489918	0.00542568	0.0058467	0.00609584	0.00607458	0.00598861	0.00593036	0.00733279	0.0101618	0.013875	0.0163261	0.0177193	0.018879	0.0208337	0.0229873	0.0242388	0.0236291	0.0234953	0.0250233	0.0269281	0.0288362
70523745		0.00099808	0.00174428	0.00256436	0.00330108	0.00419581	0.00556191	0.00726837	0.0097831	0.0113597	0.0127381	0.0141309	0.0157422	0.0173585	0.0189316	0.0199479	0.0206786	0.0220746	0.0225921	0.0227646	0.0217908	0.0210288	0.0201423	0.0191182	0.0181197	0.0180157
70524359		0.00349603	0.00282058	0.00193836	0.00138777	0.00155748	0.00268295	0.00426922	0.0063121	0.00864336	0.011624	0.0146892	0.0172146	0.0191418	0.0199254	0.0183396	0.0195473	0.020368	0.0208162	0.0216654	0.0212628	0.0209011	0.0203516	0.020877	0.0226176	0.0239351	0.0241484	0.0220254	0.0181004
70525727		0.00566138	0.00581693	0.00608671	0.00603534	0.00531829	0.00387341	0.00302327	0.00400452	0.00940216	0.00785571	0.0132181	0.00973831	0.0142079	0.0197921	0.0232301	0.024836	0.0245523	0.0254584	0.0258398	0.0249037	0.0251005	0.023097	0.0224426	0.0197035
70525894		0.00157596	0.00272968	0.00425429	0.00518576	0.00700984	0.00832948	0.00777124	0.00892907	0.00947957	0.00984384	0.0112076	0.0123582	0.0142747	0.0168554	0.0184201	0.0198869	0.019453	0.0199513	0.0193574	0.0189489	0.0192787	0.0191237	0.0178484	0.0164814	0.0152018	0.0140364	0.0132392	0.0125957
70525964		0.00207401	0.00131878	0.00151053	0.0026924	0.00392312	0.00444203	0.0046634	0.00518373	0.00669073	0.0082852	0.0099571	0.0114109	0.0127516	0.0136421	0.0135789	0.014741	0.0171042	0.0194765	0.0213416	0.0222654	0.0222566	0.021508	0.0208429	0.0212843	0.0220434	0.022444	0.0229634	0.0227734	0.0220077	0.0216682
70526104		0.00274479	0.00233366	0.00303857	0.00459677	0.00464616	0.0072458	0.0105124	0.0142312	0.0177132	0.0205935	0.0224202	0.025716	0.0294331	0.0307675	0.0292226	0.0264532	0.0268141	0.0279275	0.0299051	0.0306392
70526271		0.00219737	0.00244715	0.00262072	0.00268754	0.00302923	0.00373713	0.00427479	0.00435931	0.00481816	0.006325	0.00738538	0.00839825	0.00941178	0.0107111	0.0120211	0.0132278	0.016548	0.0189828	0.0202901	0.0220544	0.0248615	0.0285974	0.0302666	0.0286673
70526718		0.00317489	0.00373753	0.0044675	0.0055466	0.00684573	0.00832695	0.0104703	0.0130108	0.0157672	0.0181	0.0198593	0.021424	0.022488	0.0242511	0.0258178	0.0279525	0.0270009	0.0252161	0.0235261	0.0210549	0.0192649	0.0176123	0.0167631	0.0160137	0.0149464	0.0137957	0.0120774
70527262		0.00328065	0.00293881	0.00248229	0.00117766	0.00149038	0.00251115	0.00304338	0.00327862	0.00419512	0.0059573	0.00816165	0.0096835	0.0135151	0.016788	0.0199313	0.0221182	0.0229833	0.0229509	0.0227579	0.0225821	0.022636	0.0225718	0.0238263	0.0227787	0.0227563	0.0198165
70527569		0.00269384	0.00350485	0.0039935	0.00418079	0.00429975	0.00468467	0.00497045	0.00528229	0.0055894	0.00592198	0.00659548	0.00801742	0.0100322	0.0126427	0.0152434	0.0162546	0.0193127	0.0229426	0.0255254	0.0263263	0.0259256	0.0254446	0.0251634	0.024807	0.0235255	0.0214518
70527639		0.0074511	0.00691725	0.00767489	0.00765521	0.007603	0.00758333	0.00737253	0.00753641	0.00819365	0.00858358	0.00785806	0.00639958	0.00472152	0.00315754	0.00263871	0.00392048	0.00608025	0.00881146	0.0122115	0.015942	0.0189954	0.0203049	0.0195555	0.0190938	0.0180726	0.018912	0.020564	0.021954	0.022362	0.0218449
70527709		0.00438454	0.00466757	0.00486515	0.00484589	0.00450817	0.00377551	0.0018298	0.00310327	0.00533081	0.00758626	0.00968316	0.0114286	0.0127024	0.0134246	0.0135429	0.0132233	0.0132858	0.0140427	0.0160128	0.0184322	0.0216183	0.0263665	0.0300637	0.0317116	0.0318625	0.032807	0.0299414
70527876		0.00242923	0.00278524	0.00340704	0.00324284	0.00455854	0.0062625	0.0089826	0.0116305	0.0139515	0.0157571	0.0173052	0.0186803	0.0193722	0.0221505	0.0229354	0.0258813	0.0266473	0.0258021	0.0272106	0.0271246	0.0279987	0.0280567	0.0252978
70528323		0.00177038	0.00144982	0.00119765	0.00130698	0.00172724	0.00229917	0.00301315	0.00374428	0.00427884	0.00441663	0.00397793	0.00384167	0.00466675	0.0060449	0.00753211	0.00848086	0.00962481	0.0106717	0.0122076	0.0145166	0.0171212	0.0189257	0.0218441	0.0214908	0.0218827	0.0234205	0.0251671	0.0263887	0.0260315	0.024331
70528560		0.00332509	0.00302647	0.00277657	0.00288158	0.00314987	0.00315464	0.00264912	0.00227548	0.00195829	0.0038046	0.00690867	0.00932517	0.0102344	0.0143914	0.0173061	0.02197	0.0278833	0.0310975	0.0339087	0.0336324	0.0302835	0.0274805	0.0251633	0.0255179
70529551		0.00592634	0.00579312	0.00619784	0.00851755	0.0130615	0.0187166	0.0238711	0.0270593	0.027863	0.0275601	0.0267422	0.0243118	0.0259446	0.0238876	0.0238038	0.0245138	0.0224668	0.0210553	0.0197939	0.0179573
70530235		0.00282779	0.00249681	0.00197974	0.00190941	0.000771491	0.00101234	0.000919188	0.00211153	0.00370269	0.0054	0.00615962	0.00700686	0.0079311	0.00853322	0.0115899	0.0140979	0.0142085	0.0154911	0.0161283	0.0173163	0.0187221	0.0189866	0.0193917	0.0192082	0.0191939	0.0187566	0.018006	0.0175407	0.0169465	0.016362
70530542		0.00346128	0.00409374	0.00487922	0.00535455	0.00687573	0.00914774	0.0115375	0.0136047	0.0155749	0.0156037	0.0173338	0.0190007	0.022397	0.0244941	0.0257293	0.0257709	0.0243529	0.0219534	0.0195563	0.0195964	0.0197554	0.0211262
70530919		0.00437727	0.00556319	0.0065629	0.00776353	0.00582407	0.006631	0.00799785	0.0102288	0.0131408	0.0138161	0.0139165	0.0148986	0.0164882	0.0163802	0.0184821	0.0210988	0.0254536	0.0277262	0.0308699	0.0315541	0.0314245	0.0299351	0.0279331	0.0254718	0.0235678	0.0213453	0.0187815
70531156		0.00316338	0.00268376	0.00197484	0.00113492	0.000366686	0.000324687	0.000990021	0.0013129	0.00199982	0.00211583	0.00293816	0.00333552	0.00376394	0.00386718	0.00352776	0.00272037	0.00265669	0.00233294	0.0020421	0.00154677	0.00102955	0.00192236	0.00358595	0.00533812	0.00695557	0.00826575	0.00922387	0.0103365	0.0122819	0.0151302
70531393		0.00381456	0.00355728	0.00382748	0.0029634	0.00381243	0.00729713	0.00826832	0.0121596	0.0163605	0.0197552	0.0211629	0.020649	0.0202383	0.0212337	0.0186725	0.0199611	0.0211677	0.0256906	0.0279338	0.0273749	0.0242457	0.0220721	0.0215412	0.0211055
70532384		0.00415302	0.0044415	0.00495274	0.00572909	0.00570967	0.00609214	0.00586593	0.00424491	0.00212368	0.000825152	0.00224004	0.00371958	0.00809441	0.0107461	0.0136175	0.0162204	0.0181534	0.0191871	0.0192907	0.0185842	0.0181159	0.0174529	0.0180182	0.0178424	0.0190828	0.0203809	0.0201322	0.0195861	0.0182918	0.0190819
70532524		0.00442711	0.00430608	0.00457583	0.00479275	0.00537924	0.00577326	0.00685037	0.00733919	0.00861283	0.00944935	0.0107812	0.012543	0.015533	0.0186817	0.0187679	0.0226868	0.0239923	0.0258288	0.0245849	0.0276797	0.0288624	0.0293566
70533138		0.00317287	0.00263847	0.00245086	0.00232975	0.00255859	0.0032425	0.00431573	0.00545318	0.00653072	0.00914815	0.0102416	0.0118672	0.0142428	0.0167976	0.0186482	0.0197719	0.0210959	0.0229349	0.0247325	0.0253762	0.0250076	0.0238379	0.0221006	0.0219017	0.0220224	0.0224819
70533445		0.00286485	0.0028315	0.00269349	0.00295624	0.00281129	0.00247956	0.00186268	0.00125188	0.00204816	0.00329933	0.00329008	0.00522814	0.00779631	0.0103	0.0131431	0.0154944	0.0166486	0.0199325	0.0204668	0.0223892	0.02265	0.0223603	0.0209127	0.0195287	0.0193595
70533752		0.00368373	0.00396236	0.0037974	0.00360764	0.0032665	0.00298147	0.00324599	0.0040233	0.00550625	0.00737272	0.00920373	0.0110742	0.00953716	0.0113317	0.0131036	0.0157068	0.0188351	0.0220411	0.0233801	0.0232499	0.0230403	0.0232161	0.0236189	0.0243577	0.0244224	0.0235944	0.0235447
70533989		0.00243139	0.00257512	0.00210671	0.00201271	0.000860255	0.00191685	0.00460948	0.00798091	0.00575141	0.00911908	0.012796	0.0169505	0.018019	0.0180241	0.0184987	0.019983	0.0235795	0.0252125	0.0276824	0.0284373	0.0275832	0.026358	0.0253696	0.0247663	0.0238276	0.0214515	0.0194788	0.0181128	0.016745
70535050		0.00174748	0.00203326	0.00226969	0.00212525	0.00172148	0.00183649	0.0032276	0.00520741	0.00774393	0.00835649	0.0110618	0.0137146	0.015744	0.0169383	0.0176439	0.0192275	0.020658	0.0219181	0.0219463	0.0204711	0.0186763	0.0164159	0.0144876	0.0151176	0.0142385	0.0150336	0.0163778
70535120		0.00194399	0.000527269	0.000722709	0.00186863	0.00323617	0.00489892	0.00604214	0.0077266	0.00905784	0.00987872	0.00956067	0.0108411	0.0135305	0.0167131	0.019761	0.0186186	0.0198291	0.0210321	0.0227489	0.0245162	0.0254397	0.0253735	0.0247525	0.0247768	0.0231793	0.0228543	0.0218469
70535427		0.00328107	0.00352228	0.00464868	0.00543439	0.00550445	0.00575501	0.00680594	0.00797274	0.00975042	0.0123553	0.0153195	0.0175136	0.0185103	0.0189971	0.0191561	0.0193987	0.0204281	0.0214929	0.021897	0.0220326	0.0211743	0.0199963	0.0201988	0.0206057
70535664		0.00319118	0.00338896	0.00348934	0.00347518	0.00343032	0.00357657	0.00410441	0.00481917	0.00612402	0.00869363	0.0122145	0.0155865	0.017235	0.0176361	0.0177444	0.0178175	0.0187021	0.0194639	0.0205286	0.020554	0.0192735	0.0178684	0.0176126	0.0165692	0.017248
70535734		0.00407916	0.00395799	0.00419733	0.00503539	0.00521573	0.00560959	0.00602868	0.00677192	0.00801541	0.00930011	0.0117981	0.0136882	0.0140539	0.0161501	0.0188107	0.0207928	0.0243486	0.0262301	0.0252312	0.0254575	0.0257067	0.0240515	0.022145	0.0194784	0.0209561	0.0185161	0.019104	0.0195313
70535804		0.00290651	0.002809	0.00246452	0.00216902	0.00197419	0.00119581	0.0014834	0.00281693	0.00435649	0.00592431	0.00754034	0.00941637	0.0114561	0.0142303	0.0162714	0.0187142	0.020781	0.0215275	0.0213849	0.0209988	0.0210996	0.0212604	0.0213864	0.0224906	0.0222653	0.0214867
70536278		0.00500504	0.00479143	0.00412677	0.00349948	0.00327165	0.0034043	0.00368595	0.00396688	0.00441574	0.00458798	0.00451128	0.00426839	0.00364896	0.00379107	0.00470301	0.00490378	0.00736513	0.0103975	0.0135481	0.0156992	0.0175398	0.0200479	0.0217126	0.0222447	0.0224496	0.0238377	0.024105	0.0242622	0.023165	0.0224915
70536348		0.0040603	0.00389771	0.00372472	0.00353274	0.00356146	0.00409943	0.00549324	0.00830176	0.0118281	0.015582	0.019108	0.0218465	0.0234529	0.0242492	0.0249224	0.0261048	0.0275395	0.0277747	0.0295301	0.0314824	0.0308628	0.0289317	0.0256253	0.0253169	0.0211916	0.0179463	0.0159969	0.014854	0.0134121
70536655		0.0035262	0.00312768	0.003094	0.00348445	0.00387651	0.00396181	0.0037492	0.00335531	0.00296287	0.00298663	0.00410189	0.00580703	0.00821961	0.0116212	0.0159033	0.0223493	0.0257004	0.0284005	0.0299492	0.0291367	0.0288634	0.0273418	0.0262372	0.0248659	0.0236186	0.0238153	0.0244198	0.0247932	0.0241408
70536725		0.00725108	0.00812435	0.00873592	0.00895533	0.00866658	0.00785729	0.00687432	0.00671055	0.00828319	0.0113183	0.0152627	0.0197516	0.0243654	0.0289513	0.0328748	0.0334771	0.0332195	0.0322538	0.0294969	0.029142	0.0297693	0.0320556	0.0314437	0.0277593
70537576		0.00264059	0.00242328	0.0022715	0.00289747	0.00444773	0.007199	0.00825475	0.0119468	0.0151639	0.0170092	0.0186324	0.0193573	0.0203584	0.0218686	0.0245742	0.0266485	0.0272243	0.0263755	0.0268464	0.0255168	0.0255936	0.0249259	0.0237489	0.0221259	0.0200214
70537716		0.0015806	0.0018773	0.00266737	0.00349022	0.00437526	0.00481302	0.0046229	0.00403951	0.00337163	0.0040009	0.00480634	0.00617014	0.00785435	0.00921216	0.01102	0.0139754	0.0171105	0.0197843	0.0209776	0.0228243	0.0227526	0.0235513	0.0287661	0.030483	0.0322382	0.0321455	0.0318555	0.0308573	0.0283099
70538023		0.00492568	0.0059404	0.00584774	0.00618067	0.00615726	0.00582953	0.00536328	0.00506181	0.00460093	0.00427235	0.00408666	0.00414742	0.00365723	0.00343661	0.00356434	0.00392506	0.00449343	0.00572329	0.00733082	0.00908414	0.0108229	0.0125979	0.0146642	0.0168047	0.0188439	0.0206936	0.0227663	0.0251385	0.0279269	0.0299042
70538330		0.00211821	0.00238618	0.00256407	0.00279762	0.00280291	0.00302854	0.00381853	0.00486972	0.00580385	0.006601	0.00887616	0.0109654	0.0128974	0.0149079	0.0174982	0.0201164	0.0214294	0.0230604	0.0241053	0.0237405	0.0224185	0.0214931	0.0216512	0.0225725	0.0233545	0.0235348	0.0245166	0.0250422
70538637		0.00131908	0.0012795	0.00214653	0.00283035	0.00307039	0.00295756	0.00277542	0.00283171	0.00326948	0.00406698	0.00521082	0.0067905	0.00889687	0.0112354	0.0123201	0.0120784	0.0107437	0.00969997	0.0103072	0.0133481	0.0187263	0.0235435	0.025311	0.02586	0.0247749	0.0219371
70539014		0.0027118	0.00298657	0.003204	0.0033185	0.00334244	0.00325218	0.00298796	0.00260784	0.00231264	0.00257697	0.0034069	0.00436149	0.00586875	0.00866283	0.012145	0.0156796	0.0184817	0.0202401	0.0213582	0.0207307	0.0216252	0.0212438	0.0216167	0.024215	0.0262246	0.0274844	0.0282227
70539181		0.00474088	0.00466011	0.00472852	0.00509381	0.00531934	0.00511405	0.00452301	0.00391646	0.0039207	0.00539879	0.00610766	0.0118525	0.0154978	0.0160561	0.0190092	0.0214544	0.0217867	0.0217818	0.0202738	0.0197554	0.0195849	0.0206478	0.0218177	0.0263088	0.0290127	0.0300705	0.028486	0.0281342
70541777		0.00551484	0.00506235	0.00455356	0.00411937	0.00426532	0.00337061	0.00318811	0.00336404	0.00467003	0.00682687	0.00963733	0.0124556	0.0148696	0.0165971	0.0179586	0.0193002	0.0209745	0.0224122	0.0230899	0.0235106	0.0237555	0.0235161	0.0232209	0.0221999	0.0217472	0.0213397	0.0212744
70541917		0.00389857	0.00429395	0.00435723	0.00345844	0.0032888	0.00315248	0.00294841	0.00271571	0.0027093	0.00275911	0.00320397	0.00383804	0.00449102	0.00548219	0.00688384	0.00863474	0.0101864	0.0120405	0.0130326	0.0136968	0.0157126	0.0201891	0.0231466	0.0229653	0.0256476	0.0256482	0.0250933	0.0272699	0.0268075	0.0258014
70542224		0.00232157	0.00207131	0.00176833	0.00132557	0.00106235	0.000983222	0.00112817	0.00115595	0.000971426	0.000624991	0.000809699	0.00160144	0.00238833	0.00283654	0.00317577	0.00483534	0.00836765	0.0131873	0.0180425	0.0221747	0.0242566	0.0230789	0.02238	0.0211571	0.0197895	0.0196049	0.0191121	0.0185728	0.0183334	0.0193227
70542461		0.00270127	0.00189766	0.00279267	0.00428182	0.00697727	0.0100794	0.0109817	0.0107873	0.00898135	0.00953444	0.010056	0.0129515	0.0161245	0.018495	0.0175163	0.0184543	0.0208272	0.0219807	0.023451	0.023592	0.0226585	0.021361	0.0195499	0.0182488	0.0172824	0.0169501	0.0173756	0.0184825	0.0188778	0.0182907
70542838		0.00114724	0.00125889	0.0019808	0.00287744	0.00352668	0.00366629	0.00364168	0.00449512	0.00529646	0.00533283	0.00568997	0.00607955	0.00660157	0.00737897	0.00883	0.0105026	0.0119895	0.0130854	0.012943	0.0126198	0.0130195	0.0126287	0.01419	0.0164912	0.0185169	0.0199688	0.0209624	0.0211593	0.0230405	0.0232025
70543215		0.0048987	0.00551219	0.00565576	0.00567673	0.00571858	0.00569528	0.00557888	0.0054854	0.00460514	0.00472393	0.00572429	0.00768205	0.0102279	0.0134804	0.0168077	0.0188966	0.0190993	0.0187741	0.0188962	0.0204275	0.0233395	0.0261693	0.0276941	0.024995
70544066		0.00911758	0.00789726	0.00612016	0.00474324	0.00436696	0.00508008	0.00576181	0.00647307	0.00739844	0.00876481	0.0100517	0.0118935	0.0137644	0.0162235	0.0192841	0.021072	0.0218906	0.0218159	0.0224917	0.0223488	0.0236322	0.0250271	0.025952	0.0261864	0.0265799	0.0278039	0.0280407	0.0265532
70544136		0.00170115	0.00274391	0.00349331	0.00339753	0.00311676	0.00297988	0.00359197	0.00501825	0.00729703	0.00968482	0.0119156	0.0138085	0.0158523	0.0174535	0.0193453	0.0208821	0.0213154	0.0214537	0.0220107	0.0228901	0.0231974	0.0228678	0.0223686	0.0218968	0.0210277	0.0193707
70544206		0.00163157	0.000995164	0.000692752	0.0010787	0.00165796	0.00222822	0.0020138	0.00251182	0.00302252	0.00514702	0.0079268	0.00881289	0.0103029	0.0125137	0.0151018	0.0168481	0.0184369	0.0194257	0.0201982	0.0201454	0.0223723	0.0257223	0.0286227	0.0295226	0.0287611	0.0262641	0.0232122	0.0215504
70544373		0.00427225	0.00269887	0.00157318	0.00156201	0.00181801	0.00269458	0.00237366	0.00278674	0.00339719	0.00498333	0.00682853	0.00924038	0.0126298	0.0166272	0.0201371	0.0192887	0.0211619	0.0222336	0.0230093	0.0238354	0.0245687	0.0243125	0.0249014	0.0263341	0.0271862
70545127		0.00250999	0.00279732	0.00205046	0.00158051	0.00202444	0.00222107	0.00256942	0.00308053	0.00404925	0.00541303	0.00684174	0.00884755	0.0117244	0.0149158	0.0176028	0.0193649	0.0200641	0.0204857	0.021796	0.0229916	0.0235808	0.0235486	0.0228429	0.0226319	0.0225266	0.0214034
70545811		0.00309846	0.00276535	0.00252039	0.00244957	0.00245608	0.00272225	0.002779	0.00280876	0.00314316	0.00538321	0.00597819	0.00637957	0.00693419	0.0100814	0.0121265	0.0145606	0.0174704	0.0207662	0.0227758	0.0248846	0.0256871	0.0249062	0.0238312	0.0220714	0.0200186	0.0179334	0.0165396	0.0153648	0.0148891
70546425		0.00777486	0.00734944	0.00647605	0.00531432	0.00537901	0.00390294	0.002507	0.00170271	0.00124791	0.00145345	0.0019881	0.00145456	0.00231915	0.00313318	0.00390158	0.00469758	0.00732094	0.00689294	0.00942392	0.0119538	0.0144916	0.0167594	0.0184533	0.0194339	0.0196696	0.0207246	0.0198656	0.0199766	0.0192914	0.0193021
70546662		0.00397781	0.00450909	0.00569253	0.00617087	0.00556862	0.00465593	0.00533248	0.00591417	0.00666709	0.00763672	0.0104435	0.013449	0.0159739	0.014529	0.0159772	0.0172495	0.0182546	0.0213743	0.0243454	0.0266075	0.0282551	0.0290263	0.0281818	0.0266027	0.0252382	0.0252049
70546732		0.00484437	0.0048707	0.00463641	0.00426931	0.00424343	0.00382119	0.00351288	0.00335879	0.00314375	0.00302929	0.00323825	0.00380924	0.00519299	0.00658283	0.00683424	0.00802164	0.00949882	0.0111845	0.0131301	0.0152917	0.0144235	0.017156	0.0182235	0.0192412	0.0216977	0.0226983	0.02429	0.0264868	0.0297985	0.0290025
70547039		0.00479004	0.00435751	0.00467974	0.00427468	0.00478399	0.00498892	0.00468495	0.00412869	0.00392075	0.00429643	0.00467948	0.00472433	0.00454828	0.00431321	0.00391133	0.00308555	0.00182348	0.00129553	0.00321	0.00621124	0.00997594	0.0143221	0.0183757	0.021262	0.0230226	0.0242818	0.0254368	0.0257983
70547276		0.005502	0.00549656	0.00528015	0.0055762	0.00589254	0.00567699	0.00471424	0.00338156	0.00252899	0.0023887	0.00292865	0.00416911	0.00546479	0.00684393	0.00849044	0.0106561	0.0134535	0.0163034	0.0184295	0.0197384	0.0197062	0.0200428	0.0205205	0.0203204	0.0223088	0.0216958	0.0198568	0.0196383	0.0193207	0.0185757
70547416		0.00216179	0.00245777	0.00283948	0.00286028	0.00317758	0.00437955	0.00500239	0.005907	0.00621157	0.0062579	0.00642969	0.00734349	0.00946918	0.0121296	0.0147607	0.016957	0.0190273	0.0209236	0.0224113	0.0223197	0.023051	0.0235373	0.0233267	0.0221789	0.0205351	0.0185079	0.0165801	0.0151451
70548197		0.00441035	0.00421279	0.00389756	0.00400743	0.00422341	0.00407038	0.00361736	0.00317049	0.00308078	0.00317437	0.00335319	0.00349757	0.00380447	0.00458087	0.00589167	0.00759472	0.00957383	0.0117414	0.0132806	0.0149392	0.0176113	0.020299	0.0225395	0.0242527	0.0257817	0.0272846	0.0284469	0.0287861	0.0291608	0.0290303
70548644		0.00497148	0.00505662	0.00552479	0.0054299	0.0050985	0.00580316	0.00682346	0.00840282	0.0105928	0.0129449	0.0133617	0.0164704	0.0205265	0.0238339	0.0257089	0.02541	0.0255922	0.0252768	0.0255118	0.0252237
70549021		0.000946012	0.00120721	0.00137509	0.00190591	0.00252372	0.00289486	0.00325984	0.00386069	0.005049	0.00529608	0.00806359	0.00850847	0.0104229	0.0119514	0.0134094	0.0153733	0.0164703	0.0181578	0.0222522	0.0215124	0.0209718	0.0222366	0.0230372	0.0255572	0.026432	0.0269745	0.0254232	0.0251046	0.02346
70549495		0.00427914	0.00425802	0.00465198	0.00510712	0.00542793	0.00554841	0.00597376	0.00639679	0.00563969	0.00466877	0.00469764	0.00403771	0.00377751	0.00343321	0.00316101	0.00338902	0.00416162	0.00454645	0.0067724	0.00935883	0.0122144	0.0152922	0.0178766	0.0195327	0.0212461	0.0237549	0.025979	0.0279766	0.0271475	0.0251161
70550249		0.0041045	0.00459583	0.00507033	0.00498192	0.00481919	0.00507642	0.00489708	0.00710821	0.00690029	0.00842646	0.0100104	0.0123483	0.0155526	0.0185361	0.0203884	0.0234744	0.02546	0.0266906	0.027525	0.026737	0.024948	0.0224727	0.0205521	0.0197677	0.0180114
70550793		0.00255844	0.00331664	0.00491752	0.00584399	0.00623632	0.00665271	0.00691969	0.00872665	0.00911814	0.0121718	0.016385	0.0247019	0.0352477	0.0301618	0.0380057	0.042244	0.0424345	0.0391451	0.0358185	0.0315896	0.0289868	0.0293144	0.0279605	0.0241879	0.0239079	0.0170081	0.0160034	0.0141421	0.0110166
70551784		0.003796	0.00396261	0.00421415	0.00410589	0.00362629	0.00286386	0.00212935	0.000981425	0.0011931	0.00317277	0.00632062	0.00957488	0.0126538	0.0150957	0.0171604	0.0190504	0.0208012	0.022574	0.023609	0.0242031	0.0253973	0.0262825	0.026201	0.0246422	0.0228539	0.021686
70551854		0.00299874	0.00304654	0.00290787	0.00313326	0.00366529	0.00454833	0.00606558	0.0084173	0.0119035	0.0143922	0.0164878	0.0182621	0.0194983	0.020751	0.0228847	0.0250363	0.0260991	0.0255489	0.0247597	0.0233386	0.0227645	0.0220775	0.021512	0.0219192	0.0211923	0.0219349
70552161		0.00260093	0.00326667	0.00377952	0.00411973	0.0042848	0.00434999	0.00460229	0.00479152	0.00409712	0.00497068	0.00602971	0.00794608	0.00804669	0.0101569	0.0127732	0.0129484	0.0162489	0.0185487	0.0196055	0.0200065	0.0202823	0.0205397	0.0210927	0.0217099	0.0217011	0.0224306	0.0231974	0.0243662	0.0247938
70552301		0.00269578	0.00150656	0.000802748	0.00155369	0.00196852	0.00254276	0.00300259	0.00364022	0.00386652	0.00443158	0.00482104	0.00514428	0.00552004	0.00584281	0.00609496	0.00661772	0.00781643	0.00963	0.0118464	0.0142134	0.01574	0.0170311	0.0185382	0.020292	0.0218237	0.0220791	0.0220201	0.0223687	0.0220402	0.0226297
70552468		0.00334442	0.00304475	0.00240809	0.00155869	0.000929279	0.00147734	0.00246804	0.00353181	0.00398253	0.00428012	0.00510987	0.0075599	0.00953337	0.0122312	0.0159188	0.0200302	0.022025	0.0220068	0.0224952	0.0230272	0.0224558	0.0203379	0.0193008	0.0192151	0.0200456	0.0207008	0.0207334	0.020506	0.0202533	0.0203021
70552608		0.00164889	0.00197566	0.00210529	0.00213088	0.00218088	0.00233801	0.0035282	0.00318491	0.00476572	0.00508781	0.00541234	0.00571289	0.00761506	0.0105779	0.013939	0.0170952	0.0197386	0.0223456	0.0252028	0.0283855	0.029267	0.0321917	0.030208	0.0302364	0.033606	0.0340001	0.0360977
70552775		0.00189372	0.00186015	0.00207072	0.0024406	0.00305915	0.0039657	0.00504039	0.00619693	0.00744296	0.00925936	0.0113634	0.0138365	0.0163966	0.0187707	0.0210651	0.0221028	0.0217742	0.0210185	0.020227	0.019704	0.0198654	0.0209054	0.0211913	0.0213882	0.021683	0.022503
70553152		0.00371535	0.00371973	0.00367177	0.00330927	0.00254128	0.00174687	0.00142988	0.00221565	0.00419897	0.00695928	0.0102337	0.0137943	0.017932	0.0227521	0.0262714	0.0285223	0.0282069	0.028139	0.0265669	0.0251914	0.022991	0.0226263	0.0216908	0.02167	0.0209874	0.0211487	0.0220176
70553529		0.00169227	0.00297239	0.00493768	0.00776861	0.00934417	0.0102277	0.0134046	0.0173885	0.0197488	0.0215593	0.022564	0.0222935	0.0229238	0.0239807	0.0234604	0.0240587	0.0227701	0.0223668	0.0236751	0.023421	0.0229055	0.0222038	0.0204612	0.0181591	0.0164385
70553696		0.00393705	0.00348981	0.00281289	0.00275539	0.0030418	0.00338635	0.00319502	0.00317042	0.00231699	0.00179734	0.00231047	0.00406466	0.00445286	0.00635497	0.00813377	0.00860068	0.00896624	0.0115854	0.0160167	0.021559	0.0245805	0.0279983	0.0319344	0.0313696	0.0322826
70553836		0.00188614	0.00121672	0.00172161	0.00272535	0.0038454	0.00493946	0.0058308	0.00687105	0.00734252	0.00752187	0.0083132	0.00875154	0.00949089	0.0106182	0.0121895	0.01242	0.0145981	0.0152838	0.0160704	0.0164006	0.0172083	0.01904	0.0217138	0.0247461	0.0250198	0.0245642	0.0231023	0.0220029	0.0215496	0.0213022
70554073		0.00356382	0.00322484	0.00292854	0.00248858	0.00174561	0.00198126	0.00310071	0.00374668	0.0052288	0.00686771	0.00856547	0.0113703	0.0138706	0.0160821	0.0174059	0.0181572	0.0196104	0.0217936	0.0233261	0.0255245	0.0267992	0.0254043	0.0233394	0.0216938	0.0204508	0.0196735	0.0195685	0.0197141
70554827		0.0019779	0.00349119	0.00452473	0.00462385	0.00403593	0.00315126	0.00271666	0.00370555	0.00584624	0.00873161	0.0123209	0.016631	0.0199441	0.0218367	0.022364	0.0227435	0.0238555	0.0243543	0.0252214	0.024666	0.0243095	0.0233155	0.022219	0.0200724	0.0182211	0.0161909
70555134		0.0027267	0.00335898	0.00402775	0.00459037	0.00488966	0.00484447	0.00463163	0.00483776	0.00549029	0.00669277	0.00835562	0.00999747	0.0120551	0.0148664	0.0181048	0.0210213	0.0219774	0.0223956	0.0220066	0.0218946	0.0224781	0.0233823	0.0236515
70555204		0.00531113	0.0048999	0.00442876	0.00333199	0.00310947	0.00301816	0.00419034	0.00565624	0.00715016	0.00875806	0.0111656	0.0142171	0.0151464	0.0171903	0.0186921	0.018678	0.018268	0.0176103	0.0178803	0.0194106	0.0211307	0.0227113	0.0220736	0.0199593	0.0183226	0.0159941	0.0147056	0.0144134	0.0142795	0.0142136
70555371		0.00252427	0.00364508	0.00427181	0.00329712	0.00281037	0.00255777	0.00382626	0.00632211	0.00861072	0.00889394	0.0112697	0.0144107	0.0168449	0.0217359	0.0228391	0.0235724	0.0241767	0.0254335	0.0274069	0.0258722	0.0272316	0.0268912	0.025248	0.02394	0.0238447	0.0232003	0.0227977
70555511		0.0088377	0.00909419	0.011167	0.0124937	0.0135202	0.0141039	0.01645	0.0191849	0.0212701	0.0223439	0.0212935	0.0192971	0.0177899	0.0162265	0.0154413	0.0151454	0.0153132	0.0161174	0.017231	0.0183869	0.0189583	0.0182012	0.0162899	0.0149007	0.0133686	0.0124042	0.0114366
70556125		0.0052746	0.00412488	0.00382091	0.0042012	0.0043971	0.0041969	0.00443628	0.00358738	0.0026973	0.00114011	0.00213835	0.00130551	0.00118114	0.00310275	0.00665819	0.0102474	0.0136789	0.0164906	0.0201805	0.0197158	0.0222025	0.0253384	0.0271223	0.0274392	0.0267075	0.0255874	0.0251124	0.0237973	0.0223051	0.0207165
70556739		0.00381068	0.00411319	0.00394659	0.00350078	0.00322843	0.00334842	0.00365515	0.00379589	0.00365595	0.00342067	0.00338723	0.00363638	0.004232	0.0057187	0.00807865	0.0107915	0.0136589	0.0164963	0.0179904	0.0196815	0.0213713	0.0234354	0.0250889	0.0252784	0.0249576	0.0236897	0.0246429
70557046		0.00413464	0.00315145	0.00268478	0.00252131	0.00322068	0.00417996	0.00493799	0.00535379	0.00555329	0.0056439	0.00566103	0.00561934	0.0055612	0.00503778	0.00408249	0.0029805	0.00283626	0.00442692	0.00669344	0.0101721	0.0131534	0.0159572	0.0186442	0.0208031	0.0226723	0.0241215	0.0245279	0.0233691	0.0213618	0.0205668
70557353		0.00343577	0.00392117	0.00474235	0.00544197	0.00587249	0.00578338	0.00553585	0.00539042	0.00531676	0.00558539	0.00526074	0.00444489	0.00318549	0.00234339	0.00255005	0.00332383	0.00412701	0.00622005	0.00768333	0.0101406	0.0134569	0.0169301	0.0198697	0.022035	0.0235217	0.0240564	0.0242829	0.0243505	0.0255006
70557730		0.00281731	0.00280729	0.00309797	0.00327142	0.00299593	0.00242912	0.00182383	0.00154496	0.00153698	0.00172529	0.00208528	0.00263482	0.0032567	0.00522081	0.00515566	0.00833911	0.012032	0.0154231	0.0178936	0.0194814	0.020249	0.0210855	0.0211474	0.0216769	0.0222773	0.0229187	0.0226857	0.0217968	0.0208865	0.0194168
70558414		0.00502944	0.00553419	0.00622914	0.00690911	0.00739597	0.00726914	0.0074946	0.00732811	0.00688158	0.00664832	0.00662798	0.00683047	0.00778603	0.00827758	0.00884971	0.00977145	0.0121062	0.0139449	0.0159777	0.017562	0.019617	0.0197112	0.0197969	0.0206234	0.0214765	0.022297	0.0245027	0.0253574	0.0277405	0.0291532
70558651		0.00659785	0.00584119	0.00491599	0.00376069	0.00348157	0.00354546	0.0038092	0.0041646	0.00440281	0.00436047	0.00350792	0.00299105	0.00231095	0.00154061	0.00145284	0.00148553	0.00263672	0.00412695	0.00589117	0.00805662	0.00992858	0.0119905	0.0145173	0.0191559	0.0223507	0.0240314	0.0248368	0.02539	0.0263868	0.0266719
70559195		0.00469142	0.00493991	0.00497631	0.00490989	0.00509214	0.00615551	0.00851723	0.0123197	0.0173139	0.0225777	0.0237779	0.0276219	0.0297388	0.0308236	0.0300904	0.0279833	0.0256484	0.0243768	0.0241973	0.0246518	0.0247871
70559405		0.00365665	0.00320896	0.00228932	0.00163232	0.00167273	0.00180224	0.00249002	0.00366966	0.0046783	0.00606749	0.00904985	0.0124456	0.0162357	0.0199432	0.0217146	0.0226483	0.0254144	0.0265314	0.0253721	0.0240703	0.0229756	0.0222178	0.0220149	0.0211714	0.0197855
70559572		0.00275948	0.0032902	0.00382203	0.00445622	0.00491952	0.00493917	0.0047705	0.00533199	0.00718888	0.0098212	0.0125346	0.0149699	0.0173046	0.0196895	0.0223984	0.0257582	0.0283477	0.0283672	0.027358	0.0253053	0.0233775	0.0232772	0.0245796	0.026443
70559642		0.00564158	0.00563834	0.00498451	0.00531487	0.0052409	0.00469843	0.00411519	0.00383822	0.0039811	0.00439982	0.00494806	0.00796346	0.0103316	0.0128503	0.0151884	0.017379	0.0190433	0.0202002	0.0212607	0.0217459	0.0237869	0.0242972	0.0250788	0.0254724	0.0265441	0.027071	0.0259226	0.0240485	0.0202791	0.0169793
70560186		0.00660214	0.00745579	0.0081196	0.00781583	0.0101215	0.0108535	0.0115185	0.012293	0.0130361	0.0136586	0.016581	0.0175213	0.0190187	0.0203116	0.0216058	0.0222665	0.0223648	0.0224566	0.0222677	0.0232881	0.025016	0.0277253	0.0280498	0.0260184	0.021825	0.017027	0.0152341	0.0127049
70560493		0.00432538	0.00537961	0.00670709	0.00839595	0.0100462	0.0116474	0.01406	0.0167143	0.0201537	0.0233173	0.0253905	0.0268281	0.0278744	0.0281697	0.0262588	0.0244262	0.0216087	0.0186479	0.0160132	0.01421	0.0141301	0.0134945	0.0139892	0.0146307	0.0147538	0.0128961	0.0118893
70561247		0.00181111	0.00302702	0.00487982	0.00582344	0.00812317	0.0106658	0.00977845	0.0118462	0.0139808	0.0153946	0.0160468	0.0183994	0.0189824	0.0191528	0.0191362	0.0191512	0.0203945	0.0225576	0.0247594	0.0265495	0.0232603	0.0195796	0.0181659	0.0170974	0.0153596	0.0140369	0.0130359
70561317		0.00418538	0.0045612	0.00515723	0.00546317	0.00523914	0.00444257	0.00327717	0.00243578	0.0032976	0.00575512	0.00835858	0.0108473	0.0126571	0.0138122	0.0156709	0.0179591	0.0205235	0.0233562	0.0254623	0.0267241	0.0264614	0.0258336	0.023594	0.0203686	0.0176244	0.0164928
70561931		0.00497839	0.00537773	0.00610557	0.00655671	0.0064906	0.00605172	0.00547359	0.00487867	0.00434534	0.00503477	0.00569726	0.00705106	0.00873602	0.00993493	0.0112675	0.0134487	0.0155907	0.0173618	0.0189676	0.0205576	0.0206751	0.0212158	0.0219467	0.0225612	0.0224914	0.0224318	0.0214733	0.0211649	0.0211124	0.0207738
70562238		0.00292499	0.00349189	0.00368487	0.00397868	0.00411673	0.00449634	0.00386378	0.00411667	0.00398182	0.00566362	0.00877843	0.0120023	0.0165132	0.0198016	0.0227139	0.0220994	0.0227137	0.0215857	0.0209681	0.0200516	0.0200965	0.0181994	0.017819	0.0180801
70562308		0.00326285	0.00326337	0.00337566	0.00351582	0.0035681	0.0036032	0.00369077	0.00399696	0.00482803	0.00589189	0.00651651	0.00639218	0.00580635	0.00448324	0.00334928	0.00168349	0.00355048	0.00721191	0.010091	0.0104018	0.0130838	0.0163316	0.0183392	0.0209395	0.0205131	0.0205149	0.0211913	0.0218215	0.0227764	0.0232653
70562475		0.00492802	0.00411438	0.00426128	0.00443384	0.00463689	0.00482708	0.00491745	0.00477826	0.00439135	0.00495262	0.00479645	0.00628286	0.00766279	0.00957982	0.012076	0.0150383	0.0176243	0.0190469	0.0194481	0.0196656	0.0201317	0.020929	0.0208923	0.02154	0.0219245	0.0225852	0.0234617	0.0230265	0.0226153	0.0214471
70562615		0.00174796	0.00283582	0.00452326	0.00634192	0.00825869	0.0104438	0.0123443	0.0135873	0.0144856	0.0155824	0.0174627	0.019707	0.0209052	0.0192368	0.0205745	0.020301	0.0219573	0.0223207	0.0214574	0.0199717	0.0186419	0.0192111	0.0188375	0.018022	0.0166114
70562852		0.00170609	0.00155387	0.00118046	0.000807574	0.000849429	0.00195775	0.00597647	0.00814478	0.0106001	0.0128719	0.0131945	0.0155124	0.0176845	0.0193845	0.0214422	0.0226853	0.0239551	0.0244987	0.0239217	0.0223235	0.0209651	0.0213397	0.022848	0.0246281	0.0254436	0.0231848	0.0221562
70562922		0.00301433	0.00440286	0.00512306	0.0051649	0.00480964	0.00437129	0.00413349	0.00431698	0.0044421	0.00418386	0.00373233	0.00349672	0.00434085	0.00596576	0.00758929	0.00852298	0.0106015	0.0135792	0.0174233	0.0217029	0.0251983	0.0269744	0.0270735	0.0265422	0.026274	0.0254071	0.0252037
70563089		0.00213711	0.00248136	0.00278133	0.00287494	0.00296707	0.00366138	0.00538919	0.00807968	0.0114216	0.014742	0.0183459	0.0210603	0.022323	0.02268	0.0224127	0.021725	0.0211069	0.0205499	0.0202244	0.020782	0.021681	0.0224605	0.0227697	0.0226483
70563229		0.00595112	0.00482736	0.00441179	0.00324796	0.00257162	0.00172331	0.000882505	0.000476938	0.00101801	0.00191814	0.0034156	0.00574493	0.00865759	0.0083401	0.0109322	0.014748	0.0177249	0.0199947	0.0191638	0.0217259	0.0238781	0.0254164	0.0260571	0.0258319	0.0243948	0.0216319	0.0214057	0.0207251	0.0192414
70563466		0.00464853	0.00462412	0.00503845	0.00568891	0.00604804	0.00625704	0.00623631	0.00402772	0.00199572	0.00514793	0.00835036	0.00855384	0.0116223	0.0152616	0.0157978	0.0185973	0.0205642	0.0224884	0.0236195	0.0249779	0.0269856	0.0277802	0.0276535	0.0252542	0.023055	0.0214605
70563843		0.0042754	0.00334622	0.00216403	0.00206796	0.00136684	0.00279728	0.00422712	0.00508609	0.00584924	0.00643778	0.00853052	0.0100313	0.0133867	0.0164989	0.0191962	0.0207426	0.0210278	0.0213413	0.0214157	0.0218656	0.0227148	0.0236343	0.023946	0.0233778	0.0229504	0.0219609	0.0216909	0.0202527	0.018314
70564220		0.00389624	0.00568828	0.00703168	0.00755668	0.00735868	0.0063178	0.00624376	0.00576408	0.00518611	0.00476828	0.00369548	0.00333003	0.00696004	0.0111226	0.0148596	0.0179207	0.020068	0.0215531	0.022525	0.0233743	0.0244744	0.0252259	0.0262638	0.0267565	0.0260285	0.0257215
70564764		0.00526078	0.00530125	0.00542565	0.00542935	0.00517806	0.00468263	0.00411302	0.00347172	0.0029448	0.00243194	0.00183409	0.00194269	0.00234218	0.00269287	0.00372554	0.00565377	0.00671925	0.00881782	0.0113897	0.0139576	0.0158603	0.0164425	0.0168858	0.018593	0.0214999	0.0246955	0.0266458	0.0269326	0.0256543	0.024841
70565141		0.00584448	0.00561576	0.00538405	0.00473018	0.00334078	0.00258526	0.00365305	0.0044712	0.0073147	0.0101025	0.00936716	0.0115514	0.0132546	0.0152922	0.01816	0.0209069	0.0232965	0.025084	0.026512	0.0260423	0.0246721	0.0244503	0.0243111	0.0239703	0.0247469	0.0234852	0.0212001
70565448		0.002759	0.00325098	0.00362886	0.00370248	0.00349048	0.0035533	0.00407171	0.00520871	0.0070225	0.00941331	0.0121145	0.0145588	0.0166403	0.0196583	0.0220379	0.0234669	0.0240513	0.024873	0.0257731	0.0272204	0.0265288	0.0252221	0.0237135
70565685		0.00374605	0.00387144	0.00371146	0.00307244	0.00284594	0.00217303	0.00185318	0.00171419	0.00117902	0.000605992	0.000711027	0.00103212	0.00143372	0.00151495	0.00265447	0.00346277	0.00422852	0.00633162	0.00939536	0.0121717	0.0125737	0.0172584	0.0212901	0.0238518	0.0290401	0.0299445	0.0298731	0.029104	0.0287193	0.0273647
70565755		0.00488739	0.00717165	0.00947537	0.0111941	0.0123731	0.014163	0.0160089	0.0203226	0.0240785	0.0231986	0.0243226	0.0227939	0.0228818	0.0230808	0.0234455	0.0249968	0.0272162	0.0276293	0.02435	0.0226028	0.0203306	0.0197301	0.0177503	0.0156282	0.0132739	0.0116907
70567430		0.00152572	0.0014159	0.00133232	0.00185345	0.00247361	0.00284911	0.00330443	0.00370354	0.00411332	0.00453102	0.00533136	0.00574991	0.00527938	0.00430778	0.00533805	0.00738141	0.0100731	0.0135208	0.0162873	0.0183248	0.0182458	0.0203567	0.0215531	0.0214629	0.0220997	0.0220604	0.0236661	0.0248932	0.0273335	0.0288847
70567807		0.00143557	0.00190424	0.00205139	0.00287111	0.00469333	0.00719224	0.010089	0.0131178	0.0163628	0.0195937	0.0205723	0.0221374	0.0223196	0.0220529	0.0218197	0.0225855	0.0228423	0.0252421	0.025842	0.0231029	0.019093	0.0162285	0.0138501
70568588		0.0031251	0.00258422	0.00195754	0.00109858	0.00157476	0.00365282	0.00592516	0.00785555	0.00912646	0.0101442	0.0109762	0.0128127	0.0156161	0.0187489	0.0211493	0.0225747	0.0234867	0.0244831	0.024448	0.0240682	0.0225918	0.0224099	0.022351	0.0216992	0.0214503	0.0196638	0.018169
70568965		0.00295871	0.00424613	0.00536319	0.00570886	0.00576012	0.00609243	0.00684493	0.00762429	0.00821129	0.00925986	0.0115802	0.014357	0.0167683	0.0188918	0.0211859	0.0221435	0.0237853	0.0237973	0.0231939	0.0235684	0.026187	0.0276806	0.0305976	0.0323806	0.0349879	0.0313261	0.0294619
70569035		0.00109533	0.0017628	0.00239528	0.00307944	0.00386436	0.00449118	0.00485467	0.00517716	0.00594074	0.00698158	0.00862182	0.0103546	0.0128911	0.015706	0.0169576	0.0194444	0.0202805	0.0218084	0.0228453	0.0240347	0.0250587	0.0258772	0.0243333	0.0238344	0.0228518	0.0205282
70570333		0.00383061	0.00238797	0.00304445	0.00313559	0.00486868	0.00688763	0.00903705	0.011095	0.0127104	0.0138421	0.0150508	0.0159779	0.016604	0.0170728	0.0176674	0.0182681	0.0193657	0.020818	0.0230737	0.0253594	0.0264993	0.0269938	0.0281391	0.0278056	0.0266936	0.0250182
70570403		0.00197149	0.00243813	0.00274582	0.00268515	0.00254997	0.00241571	0.00259083	0.00269219	0.00309762	0.00383378	0.00471378	0.00539694	0.00556316	0.00563868	0.00581102	0.00678216	0.00793973	0.00977384	0.0115049	0.0134837	0.0158933	0.0184751	0.0188659	0.0199051	0.0203051	0.0195667	0.0184335	0.0166404	0.0171582	0.0167392
70570640		0.00454917	0.00570079	0.00684631	0.00816253	0.00973988	0.0114438	0.0131033	0.0146902	0.0162089	0.0179846	0.0201224	0.0221981	0.0238446	0.0241325	0.0236776	0.0230782	0.0233812	0.0233225	0.0222011	0.0202907	0.019788	0.0176527	0.016275	0.0152451
70570710		0.00237926	0.00217792	0.00179985	0.00134387	0.00126317	0.00155282	0.00249976	0.00331793	0.00351302	0.00334455	0.00376993	0.00366484	0.00415959	0.00532591	0.00669499	0.0071779	0.00678729	0.00928482	0.0110692	0.0118235	0.0154621	0.0170371	0.0196647	0.0215684	0.0222626	0.0253516	0.0256787	0.0249974	0.0253776	0.0260372
70571491		0.0028892	0.00250563	0.0024313	0.00302708	0.00350045	0.00393282	0.00409729	0.00423725	0.00430067	0.00436428	0.00448988	0.00472134	0.00470629	0.00509049	0.00558978	0.00613483	0.00608191	0.00661665	0.00727869	0.00817566	0.00937533	0.0107508	0.0120873	0.0133973	0.0148584	0.0161271	0.0175818	0.0185344	0.0188056	0.0186824
70571561		0.00446704	0.00349119	0.00375528	0.00415007	0.00444105	0.00504064	0.00595939	0.00711205	0.00954545	0.0125298	0.0154077	0.0172508	0.0166364	0.0182947	0.0194968	0.0204008	0.0217177	0.0209556	0.0228249	0.0234452	0.023555	0.022847	0.0221026	0.021586	0.0218886	0.0217949	0.0208302	0.0198378	0.0184149
70571631		0.00388341	0.00385162	0.00376986	0.00369632	0.00362579	0.00372	0.00362863	0.00346266	0.00326014	0.00289584	0.00286048	0.00330757	0.00473838	0.00657039	0.00926295	0.0116443	0.0141199	0.0153002	0.0153555	0.0169085	0.0204202	0.0216772	0.0236235	0.0241069	0.0242097	0.0233256	0.0231328	0.0235824	0.0241015	0.0235158
70571938		0.00688098	0.00720946	0.00675174	0.00591742	0.00587959	0.00629177	0.00751877	0.00941095	0.00966583	0.0116924	0.0174397	0.0207364	0.0228743	0.0240816	0.0244767	0.0251319	0.0264628	0.0270288	0.0270556	0.0263724	0.0249078	0.023396	0.0206238
70572552		0.00622668	0.00844172	0.0111139	0.013687	0.0155816	0.0167158	0.0176338	0.018977	0.0208707	0.022395	0.0232553	0.0241348	0.02533	0.0260388	0.0266039	0.0244991	0.022264	0.0214775	0.019877	0.0190598	0.0195286	0.0197167
70572789		0.00281201	0.00307875	0.00372912	0.00431913	0.00456376	0.0047165	0.00509645	0.0055052	0.00600217	0.00699385	0.00874486	0.0110147	0.0121934	0.0148672	0.0189327	0.0235653	0.0264071	0.0272046	0.0276051	0.0265438	0.0250308	0.0219399	0.021185	0.0207358	0.021015	0.022146	0.0234542
70573236		0.0058571	0.00638922	0.00757002	0.00800531	0.00765921	0.00720291	0.0068361	0.00657602	0.00590909	0.00543299	0.00498878	0.00538387	0.00649221	0.00789645	0.00911598	0.0102699	0.0114703	0.0127397	0.0128935	0.0136983	0.0140831	0.0149987	0.0150699	0.0161822	0.0154794	0.015472	0.0163632	0.0174487	0.0187691	0.0192071
70573780		0.00689699	0.00659881	0.00843857	0.00775928	0.00678704	0.00607758	0.00584261	0.00717598	0.00776717	0.00860122	0.00938818	0.0111633	0.0123464	0.0139556	0.0156899	0.0163905	0.0176055	0.0198496	0.0201126	0.0196302	0.018821	0.0187942	0.0186698	0.0202004	0.0226517	0.0224937	0.0222722	0.0204383	0.0178704	0.0151523
70573920		0.00375321	0.00508288	0.00558272	0.00660904	0.00830613	0.0100071	0.0125561	0.0149051	0.0166435	0.018437	0.0199959	0.0211046	0.02227	0.0230556	0.0227194	0.0232117	0.0239387	0.0235775	0.0236743	0.0239139	0.0228928	0.0210522	0.0189789	0.0164422	0.013948
70574087		0.00297211	0.00417443	0.00540505	0.00718487	0.00977536	0.0126101	0.0154582	0.0187641	0.021177	0.0214262	0.023897	0.0257487	0.0272711	0.0290114	0.02992	0.0283305	0.0275038	0.0251922	0.0234485	0.0216763	0.0203954	0.017651	0.0173635	0.014408	0.0123369
70574841		0.00676939	0.00702885	0.00756802	0.00809267	0.00863208	0.00925225	0.0083229	0.00886004	0.00827054	0.00933554	0.00884162	0.0110422	0.010479	0.0134478	0.0143934	0.0170722	0.0171615	0.0188097	0.0179156	0.0172475	0.0170282	0.0162395	0.0155245	0.0156327	0.0150688	0.0147657	0.015707	0.0155354	0.0164743
70575692		0.00757893	0.0070387	0.00759086	0.006295	0.00547188	0.00434825	0.00361619	0.00357926	0.00344692	0.00346049	0.00357661	0.00369151	0.00380141	0.00379772	0.00391898	0.00452587	0.00553817	0.00708016	0.00824764	0.00853007	0.0096411	0.0106885	0.0108711	0.0120373	0.0136549	0.0138092	0.0145549	0.0154827	0.0166312	0.0172379
70575762		0.00233609	0.00281866	0.0022517	0.00240397	0.00221796	0.00232572	0.00271427	0.00376282	0.00515954	0.00479228	0.00635574	0.00816459	0.0108713	0.0147795	0.0178073	0.0193512	0.019943	0.0227262	0.0242997	0.0242546	0.0235882	0.0225976	0.0225445	0.0220319	0.0211541	0.021446	0.0204892	0.018541	0.0166171
70576139		0.00303818	0.00221254	0.00145472	0.00134524	0.00164421	0.00216556	0.00265982	0.00276208	0.00266487	0.00221831	0.00216292	0.00309547	0.00429301	0.0057725	0.00656949	0.0111154	0.0146217	0.0172756	0.0196998	0.0211469	0.0221004	0.0227005	0.0227569	0.0229887	0.0221249	0.0217454	0.0207218
70576823		0.00411574	0.00417584	0.00426489	0.00465377	0.0051856	0.0057523	0.0062772	0.00842208	0.00934977	0.0109322	0.0123082	0.0133705	0.0147227	0.016417	0.0183564	0.0211772	0.0256536	0.0289913	0.03106	0.0334341	0.0351208	0.0350264	0.034365	0.0328699	0.0280333	0.0224242	0.0187314	0.0159277
70577060		0.0027486	0.00236444	0.00188978	0.00161707	0.0024312	0.00353411	0.00427736	0.00434722	0.00354372	0.00358389	0.00406621	0.00514564	0.00673412	0.00796351	0.00931471	0.0115809	0.0143032	0.0177138	0.02164	0.0274081	0.0289426	0.0299313	0.032161	0.0336609	0.0343668	0.0334186	0.0334004	0.0320366	0.0320868	0.0323831
70577437		0.00500383	0.00549055	0.00582477	0.00606291	0.00634941	0.0067199	0.00706401	0.00735406	0.0080752	0.00918502	0.0103009	0.0109491	0.0107201	0.0120833	0.0135157	0.0204241	0.0236414	0.024898	0.0249065	0.0247116	0.0243559	0.0240215	0.0229499	0.0225426	0.0204569	0.0199906	0.0187247	0.0170588
70577507		0.00526561	0.00769279	0.0101556	0.012689	0.0152438	0.0182588	0.0216098	0.0241883	0.0253814	0.0251542	0.0241463	0.0249255	0.0234922	0.023822	0.0232869	0.0222368	0.0232533	0.0229211	0.021445	0.0206271	0.0208377	0.0192442	0.0163763	0.0139913
70577814		0.0032449	0.00275226	0.00259254	0.00257199	0.00266416	0.00339904	0.00320654	0.00484679	0.0064631	0.00848182	0.00977166	0.0139375	0.017468	0.0196136	0.0225211	0.0244567	0.0260991	0.0272725	0.0284745
70578121		0.00283745	0.00350479	0.00399284	0.00414048	0.00457599	0.00452593	0.00410325	0.00373493	0.00295524	0.002446	0.00445893	0.00743995	0.0101859	0.0126845	0.0151954	0.0177372	0.0201855	0.0221597	0.0232562	0.0261244	0.0263743	0.027792	0.0273057	0.0284909	0.0290314	0.0302711	0.0284625	0.0256313
70578358		0.000774585	0.000752285	0.00141947	0.0023706	0.00317689	0.00440673	0.00464424	0.00510772	0.00568351	0.00565415	0.00836077	0.00689362	0.0108469	0.0133475	0.0159824	0.0178309	0.018465	0.0183656	0.0189667	0.0194202	0.0200612	0.0204772	0.0206981	0.02075	0.0207568	0.0210391	0.0198691	0.0186707
70578805		0.00470134	0.00344394	0.00467372	0.00433672	0.00319465	0.00332901	0.00456714	0.00629941	0.00842173	0.0111377	0.0144025	0.0175755	0.0200617	0.020766	0.0219728	0.0228419	0.0236398	0.0230732	0.0236513	0.0245303	0.0243153	0.0244568	0.0233113	0.0216591	0.0192478	0.0171159
70578972		0.00457529	0.00449044	0.00374375	0.00371285	0.00353833	0.00363917	0.00422155	0.00582779	0.0085143	0.0121579	0.0157884	0.0187533	0.0211879	0.023548	0.0250291	0.0265894	0.0271984	0.0274585	0.0249962	0.0253075	0.0259823	0.0277349	0.0287349	0.026644	0.0224087	0.0186906
70579112		0.00294935	0.00360884	0.00356826	0.00340953	0.00337756	0.00472002	0.00549373	0.00929209	0.0137467	0.0180533	0.0212753	0.0259755	0.0280185	0.0280806	0.0269221	0.0253875	0.0238937	0.0246505	0.0236974	0.0232802	0.023356	0.0229998	0.0217446
70579419		0.00861528	0.00706826	0.00688122	0.00877835	0.012468	0.016058	0.0193272	0.0217778	0.0244618	0.0266756	0.0271819	0.0258268	0.0237766	0.0211556	0.0186997	0.0163739	0.01524	0.0145329	0.0139849	0.0141225	0.0149269	0.0158811
70579656		0.00266921	0.00334954	0.00399932	0.002957	0.00319983	0.00374115	0.00340569	0.00404109	0.00546337	0.00920709	0.0119648	0.0146011	0.0171228	0.0195559	0.0217801	0.0241599	0.0261888	0.0261752	0.0232527	0.0210788	0.0180004	0.0163581	0.0171718	0.0169404	0.0184893	0.0192456	0.0178453	0.0177991	0.0167921	0.0157793
70579726		0.00391546	0.00437258	0.00461373	0.0053016	0.00575894	0.00614935	0.00719283	0.0080488	0.00915974	0.0103781	0.0117224	0.0120247	0.0130444	0.0127371	0.0141793	0.0162237	0.0170235	0.0179883	0.0214573	0.0259078	0.0298218	0.0324317	0.0334851	0.0291609	0.0236378	0.021824	0.0216916
70580717		0.00228158	0.00184805	0.00133393	0.00214979	0.00189926	0.00197351	0.0023958	0.00310062	0.00397073	0.00495709	0.00640734	0.00748662	0.00888819	0.00978262	0.0114446	0.0131227	0.0144672	0.0160003	0.0182052	0.0201137	0.0206902	0.0215937	0.0215338	0.0217436	0.0220691	0.0223287	0.0221786	0.0205811	0.0191867	0.0184283
70581331		0.00863137	0.0113838	0.0146339	0.0183126	0.021869	0.0247502	0.0265991	0.0271748	0.0265686	0.0265812	0.0257547	0.0268666	0.0263247	0.0255971	0.0230378	0.0222034	0.021305	0.020863	0.020187	0.0188836	0.0165476	0.014208
70581638		0.00148354	0.00126138	0.00116747	0.0011296	0.00164516	0.00231878	0.00303568	0.00390721	0.00488146	0.00526029	0.00513786	0.00410122	0.00331113	0.00257347	0.00199017	0.0018129	0.00246644	0.0037557	0.00557953	0.00822848	0.0110638	0.0139458	0.0169619	0.0178905	0.0168884	0.014727	0.0137878	0.0133102	0.014411	0.0173194
70582015		0.00184741	0.00153921	0.00154146	0.00213426	0.00242509	0.00266396	0.0030311	0.00406023	0.00626614	0.00885665	0.00966336	0.0115618	0.0132105	0.0150628	0.0162455	0.0223235	0.0266973	0.027812	0.0281199	0.0285884	0.0297706	0.0275199	0.0254336	0.020662	0.0179017
70582559		0.00489593	0.00389204	0.00291904	0.00228766	0.00214288	0.00253324	0.00319731	0.00415112	0.00482264	0.00538068	0.0056143	0.00546903	0.00513404	0.00503471	0.00567619	0.0073644	0.00976532	0.0122877	0.0144622	0.0170723	0.0196276	0.0223019	0.0249311	0.0266388	0.0252712	0.0234208	0.0209511	0.0188638	0.0168363	0.0165283
70582629		0.00330298	0.00191981	0.000532304	0.000300015	0.000450599	0.000869809	0.00232586	0.00426746	0.00594797	0.00504563	0.0072713	0.00894979	0.0115817	0.01318	0.0140214	0.0148949	0.0151327	0.0178721	0.02019	0.0219959	0.0254669	0.0287133	0.0296031	0.0285544	0.0268073	0.0237985	0.0221811	0.0214601
70583480		0.00439313	0.00428228	0.00433828	0.0043746	0.00470233	0.00623284	0.0082135	0.0104813	0.0131951	0.0142921	0.0164594	0.0199923	0.0218277	0.0217198	0.0225119	0.0209691	0.0202427	0.021601	0.0239818	0.0271793	0.0282098	0.0277305	0.0253063	0.0245731	0.0225544
70583620		0.00519755	0.00558932	0.00599024	0.00649041	0.00705527	0.00653712	0.0064752	0.00543819	0.0044746	0.00410413	0.00388967	0.00388123	0.00456764	0.00625929	0.0063652	0.00831914	0.010563	0.0127434	0.0134521	0.016215	0.0209329	0.0250927	0.027324	0.0285495	0.0279951	0.028309	0.0298096	0.0309997	0.0308669
70583787		0.00561067	0.00503246	0.00461885	0.00450426	0.00429397	0.00425806	0.00409343	0.00396449	0.00388813	0.00348366	0.00444695	0.00584741	0.00898902	0.0101309	0.0144368	0.0184134	0.0194061	0.0219459	0.0255821	0.0271288	0.0270053	0.025392	0.0236783	0.0225053	0.0217143
70584541		0.00242434	0.00285075	0.00346401	0.00352736	0.00356434	0.0046578	0.00394038	0.00460684	0.00741074	0.00882355	0.0122534	0.0155446	0.0190411	0.0227788	0.0261043	0.0271536	0.0264268	0.0251131	0.0230271	0.0239855	0.0245482	0.0243829
70585392		0.00586566	0.00514309	0.00393726	0.00251898	0.00227642	0.00265462	0.00277728	0.00263261	0.00281216	0.0028638	0.00281615	0.0021885	0.00360545	0.00579726	0.00862417	0.0117526	0.0147655	0.0191861	0.022101	0.0244112	0.0257025	0.0258213	0.02492	0.0234018	0.0219224	0.0215975	0.0217047	0.0220526	0.0223765	0.0223948
70586453		0.0019735	0.00238241	0.00261535	0.00266865	0.00256746	0.00324894	0.00403568	0.00494889	0.00603295	0.0116581	0.01387	0.0163186	0.0189886	0.0202323	0.0218794	0.0231643	0.023864	0.0241685	0.0242126	0.0227969	0.0212034	0.0212261	0.0225254	0.0233016	0.0227708	0.0204998	0.018988	0.018146	0.0171782	0.0152444
70586760		0.00616946	0.00705862	0.008044	0.00903362	0.00861352	0.00996171	0.0090012	0.0106031	0.00812444	0.00639228	0.00438045	0.00337851	0.004586	0.00754199	0.0114685	0.0155447	0.0190486	0.0228988	0.0233982	0.0225512	0.0211972	0.0210331	0.02093	0.0216916	0.0224632	0.0220689	0.0212905	0.0199113	0.0191899	0.0181577
70587067		0.00346227	0.00340984	0.00335328	0.00336384	0.00349101	0.00378022	0.00432482	0.00511596	0.00588283	0.00628678	0.00625493	0.00724782	0.00780729	0.00787164	0.0102911	0.0128575	0.0147642	0.0157538	0.0182556	0.0197393	0.0212238	0.0227149	0.0241633	0.0238961	0.0230833	0.0223419
70588365		0.00350025	0.00316687	0.00287345	0.00214785	0.00198975	0.00219563	0.00298386	0.00342804	0.00358873	0.0040139	0.0048524	0.00506721	0.00527376	0.00555676	0.00655581	0.00845042	0.0109753	0.0137975	0.0165869	0.0188572	0.0194235	0.0208449	0.0209079	0.0198532	0.0187885	0.0171577	0.0166264	0.0159287	0.0167344	0.0163602
70588742		0.00607403	0.00475369	0.00351858	0.00305116	0.00333597	0.00395743	0.00506529	0.00591947	0.00599116	0.00580659	0.00583139	0.00689813	0.00897503	0.0115827	0.0138685	0.0154578	0.0163038	0.0172521	0.0183928	0.0195552	0.0205431	0.0208429	0.0200057	0.0193395	0.0188105	0.0182708	0.018111	0.0171461
70589119		0.00293223	0.00466998	0.00764963	0.0110323	0.012994	0.0141393	0.0151261	0.0171968	0.0206011	0.0220353	0.0245553	0.0249326	0.0237154	0.0229197	0.0232098	0.0235027	0.0252818	0.0247222	0.0230714	0.0197028	0.0153799	0.0130718
70589356		0.0045392	0.00531538	0.00567348	0.00670203	0.00815641	0.010049	0.0125736	0.0155102	0.0188446	0.0215752	0.0232487	0.0240618	0.0239818	0.0232496	0.0225475	0.0210061	0.0192432	0.0185359	0.0181001	0.0187093	0.0175735	0.0163998	0.0183408	0.0161238	0.0147324
70589593		0.0028455	0.00232794	0.00181994	0.00138903	0.00107592	0.00143931	0.00199589	0.00275719	0.00383965	0.00494813	0.00658366	0.00907032	0.0116603	0.0143209	0.0165275	0.0184052	0.0191509	0.0211915	0.0227815	0.0232299	0.0231435	0.0226866	0.0226977	0.0227981	0.0236444	0.0238283	0.0238978	0.0230756	0.0210772
70589970		0.00198624	0.00223096	0.00204279	0.00258741	0.00391865	0.00500983	0.00619726	0.00784341	0.0106539	0.0143955	0.0175915	0.0196855	0.0212856	0.0229775	0.0234367	0.0237804	0.0233152	0.0232752	0.0234752	0.0242153	0.0239736	0.0211539	0.0199296	0.0177775	0.0174648	0.0173434
70590347		0.00357761	0.00334575	0.00360095	0.00310715	0.00365885	0.00369104	0.00392833	0.00319777	0.00363778	0.00448701	0.0059336	0.00793131	0.0103007	0.0128072	0.0141533	0.0140428	0.0152083	0.0168591	0.0182119	0.0194827	0.0205805	0.0206802	0.0209711	0.0205256	0.0194922	0.0184284	0.0178163
70590417		0.00604967	0.00523185	0.00484323	0.00445978	0.00390547	0.00350926	0.00305823	0.00294822	0.00246524	0.00211496	0.00220374	0.0019616	0.00183349	0.0016031	0.00191863	0.00304941	0.00218205	0.00297604	0.00444299	0.00593359	0.00514598	0.00770642	0.00891252	0.00789671	0.00956081	0.0110476	0.0131483	0.0161495	0.018851	0.0202066
70590654		0.00317217	0.00325227	0.00341838	0.00360796	0.00376383	0.00391696	0.00406242	0.00415158	0.00432447	0.00515897	0.00559577	0.00550831	0.00580953	0.00712135	0.00653063	0.00723058	0.00733499	0.00697789	0.00765615	0.00762115	0.00778241	0.0093314	0.0099901	0.0104478	0.0115096	0.0128726	0.0154412	0.0181108	0.0215905	0.0222128
70590961		0.00586489	0.00674885	0.00702042	0.00657486	0.00566218	0.00460395	0.00456051	0.00487494	0.00762744	0.0113697	0.0152604	0.0190106	0.0222172	0.0243434	0.0238915	0.0249632	0.0260863	0.0277155	0.0286047	0.0282485	0.0274038	0.0255228	0.0229223
70592329		0.00541807	0.00508865	0.00426756	0.00292108	0.00235306	0.00171546	0.00111817	0.000454148	0.000643175	0.00171806	0.00285749	0.00374932	0.00427776	0.00537378	0.00835137	0.012554	0.0184355	0.0214497	0.0241444	0.0258885	0.025464	0.0241818	0.0234699	0.0226167	0.0243424	0.0275068	0.0300356
70592706		0.00344941	0.00412138	0.00467521	0.00490586	0.00547517	0.00689396	0.0089941	0.0115673	0.0142757	0.0160621	0.0165876	0.0174788	0.0184242	0.0191791	0.0199183	0.0210755	0.0221109	0.02236	0.0223039	0.0204878	0.0185268	0.0165974	0.0153763	0.0139829	0.0124376	0.0121444	0.00895751
70592873		0.0043292	0.00353712	0.00319014	0.00395125	0.00533139	0.00642308	0.00678831	0.00633269	0.00592632	0.00637643	0.00842396	0.0074341	0.00948822	0.0116552	0.0136093	0.0180587	0.0214361	0.0226396	0.0249846	0.0257103	0.0259016	0.0272598	0.0272717	0.0275719	0.0272234	0.0261229	0.0254365
70593934		0.0016583	0.00168962	0.00214279	0.00259291	0.00288151	0.00318401	0.00343547	0.00377989	0.00446445	0.00567133	0.00724407	0.00863121	0.00973615	0.010683	0.0114294	0.0131202	0.0146801	0.0151557	0.0152171	0.015385	0.0155408	0.01622	0.0178164	0.0202919	0.0206222	0.0220531	0.0227947	0.0235137	0.0231748	0.0226189
70594004		0.00477521	0.00432943	0.00415695	0.00405171	0.00404091	0.00379193	0.00324618	0.00267813	0.00247669	0.00228838	0.00231524	0.00267671	0.00335112	0.00420053	0.00522985	0.0068657	0.0111153	0.0126169	0.0140189	0.016206	0.0193093	0.0229645	0.0256626	0.0266657	0.0247636	0.0202868	0.0158678	0.014611	0.0167601	0.0187649
70594311		0.00230097	0.00284664	0.00287702	0.00329781	0.00359814	0.00368281	0.00376645	0.00344822	0.00352809	0.00347198	0.00340049	0.00370986	0.00471779	0.00655154	0.00878	0.011346	0.0148006	0.0170968	0.0186887	0.0197677	0.0217527	0.0241371	0.027701	0.0306369	0.0321222	0.0277096	0.0247017	0.0203435	0.0181998	0.0166439
70594618		0.00411155	0.00339397	0.00283682	0.00271946	0.00291592	0.00322996	0.00333714	0.00386146	0.00456013	0.00637455	0.00636682	0.0063571	0.00730619	0.0082367	0.00960933	0.0112853	0.0130397	0.0144262	0.0151192	0.0155675	0.0167885	0.0188084	0.0210447	0.0223687	0.0224457	0.0211378	0.0196529	0.0191348	0.0187756	0.0195064
70595092		0.00510199	0.005381	0.00564849	0.00603536	0.00606873	0.00576963	0.00519964	0.00395776	0.00471213	0.00394684	0.00357871	0.00497138	0.007691	0.0110369	0.0145364	0.0176557	0.0198564	0.0209105	0.0210386	0.0206713	0.0201496	0.0194781	0.0191799	0.0186642	0.0186609	0.0193585	0.020616	0.022234	0.0234567	0.0238576
70595302		0.00639892	0.00575244	0.00500873	0.00404834	0.00332098	0.00395349	0.00447205	0.00504135	0.00510202	0.00470255	0.00433048	0.00421916	0.00428477	0.00465807	0.0053415	0.00899534	0.0128308	0.0165084	0.0197925	0.0229873	0.025769	0.0264593	0.0246084	0.0216863	0.0204207	0.019257	0.0189143	0.0195366	0.0197259	0.0204466
70595539		0.00460326	0.00437255	0.00488252	0.00518491	0.00536691	0.00550012	0.00576048	0.00584396	0.00568808	0.00520343	0.00426037	0.00285818	0.00148919	0.00222559	0.00452256	0.00739086	0.0104533	0.0135031	0.0157534	0.0170886	0.0188277	0.0190727	0.0184327	0.0186114	0.0182385	0.0194719	0.0207797	0.0218616	0.0226066	0.0221986
70597144		0.00460362	0.00486551	0.00517733	0.00662544	0.00845363	0.011543	0.0136065	0.0154447	0.0168901	0.0178654	0.0197065	0.0229997	0.0233267	0.0248623	0.0237915	0.0224029	0.0215567	0.0228406	0.0241848	0.0262353	0.0249512	0.0239574	0.021531	0.020184	0.0188977
70597995		0.00164489	0.00150772	0.00166084	0.00166218	0.00291062	0.00429809	0.00480673	0.00471142	0.00506561	0.00556153	0.00622011	0.00726544	0.00941183	0.0120827	0.0152595	0.0182367	0.0204181	0.0216496	0.0222286	0.0223557	0.0220381	0.0217835	0.0214376	0.0226115	0.0223652	0.0244327	0.0236486	0.0244752	0.0232289	0.0234751
70598512		0.00364572	0.0038636	0.00431795	0.00463398	0.00460759	0.00399257	0.00418517	0.00340574	0.00722641	0.00929264	0.0119476	0.0149584	0.0175928	0.0192932	0.0201702	0.0203967	0.0206441	0.0209473	0.0213201	0.0214425	0.0224634	0.0222962	0.0218692	0.0230233	0.0227132	0.0227821	0.0219241
70598679		0.00160994	0.00254745	0.00367456	0.00470291	0.00444539	0.00446881	0.00448226	0.00473212	0.00547972	0.00671847	0.0082143	0.00996338	0.0152864	0.0176888	0.0193887	0.020133	0.0212175	0.0219787	0.0216301	0.0234359	0.023122	0.0186815	0.015512	0.0178376	0.0200839
70598819		0.00556721	0.00565379	0.00568711	0.00572698	0.00596309	0.00587009	0.00735389	0.00883594	0.00834792	0.00947775	0.0110944	0.0136817	0.0177804	0.0202366	0.0209387	0.0228473	0.0241345	0.0249815	0.0252178	0.0247561	0.0220877	0.0214557	0.0208444	0.0208624	0.0205964	0.0174305
70598986		0.00221406	0.00151577	0.00137085	0.00208299	0.00336742	0.00509563	0.00718047	0.00947754	0.011813	0.0134892	0.010278	0.0148416	0.0126208	0.014674	0.015964	0.0175603	0.0203615	0.0220154	0.0208837	0.0202497	0.0199768	0.0206163	0.0202751	0.0205525	0.0211989	0.021055	0.0202279	0.0193619	0.0185363	0.0174552
70599433		0.0030298	0.00281649	0.00252248	0.00316148	0.0041796	0.00454777	0.00482811	0.00476036	0.00460454	0.00514876	0.00608404	0.00541856	0.00535803	0.00585031	0.00573138	0.00732934	0.0101723	0.0094308	0.0112335	0.0128439	0.0126994	0.0144107	0.017611	0.0194394	0.0243134	0.028604	0.0331636	0.0345391	0.0376844	0.038948
70599810		0.00278456	0.0026803	0.00158484	0.00167831	0.00174377	0.00196318	0.0020606	0.00255923	0.00334216	0.0045007	0.00669107	0.00843282	0.00802412	0.00975451	0.0110815	0.0129428	0.0141725	0.0143064	0.0148956	0.0153979	0.016592	0.0183044	0.0180027	0.0182141	0.0178767	0.0170791	0.0156485	0.0149982
70600047		0.0026249	0.00252438	0.00239456	0.00212909	0.00189688	0.00183962	0.00186342	0.0018871	0.00180606	0.00158867	0.00123705	0.00137484	0.00193777	0.00337426	0.00651719	0.00757913	0.00833372	0.00869976	0.00925718	0.0109971	0.0132795	0.0173576	0.0243272	0.021886	0.0247387	0.0219053	0.0137066	0.011647	0.0126383
70600591		0.00249719	0.00422902	0.00442546	0.00424137	0.00466345	0.00518194	0.00663254	0.00858509	0.00650544	0.0102211	0.0118207	0.0191915	0.0256906	0.0479026	0.0750163	0.0932608	0.115055	0.136353	0.135194	0.152336	0.142647	0.146921	0.117109	0.0818198	0.0857742	0.0608926	0.0584632	0.0462097	0.0383111
70600661		0.00480633	0.00500321	0.00611271	0.00738352	0.00627315	0.0079452	0.00899961	0.010112	0.0111667	0.0118422	0.0124578	0.0137306	0.0149565	0.0169722	0.018824	0.0197607	0.0197177	0.0184397	0.0190334	0.0190887	0.0188781	0.0186368	0.0185178	0.0183271	0.0180577	0.0175658	0.0159545	0.0141316	0.0120274
70600801		0.00418822	0.00423823	0.0036834	0.00283983	0.00180655	0.00129499	0.00110436	0.000833084	0.00102761	0.00160799	0.00179036	0.0020194	0.0028006	0.0047187	0.00685541	0.00928685	0.0118243	0.0138986	0.0154363	0.0163957	0.0166038	0.016674	0.0164837	0.0168046	0.0169118	0.0186296	0.0185903	0.0195755	0.0195364	0.0182255
70601415		0.00331299	0.00413949	0.00449799	0.00498621	0.00546679	0.00579537	0.0063032	0.0074323	0.0089201	0.0100289	0.0113322	0.0128373	0.0138862	0.0147051	0.0154943	0.0162663	0.0177549	0.0187581	0.0210185	0.0225901	0.0224759	0.0220831	0.0221286	0.0222197	0.0221371	0.0213928
70601722		0.00367769	0.00401028	0.00482101	0.00531799	0.00578285	0.00501109	0.00571446	0.00509347	0.0042135	0.00387001	0.00527153	0.00797759	0.0107043	0.0122168	0.013233	0.0157341	0.0179578	0.0197919	0.0209711	0.021767	0.0241019	0.0259419	0.0259124	0.0238287	0.0213893	0.0199755	0.0185059	0.0174431
70601889		0.00335548	0.0041111	0.00376228	0.00611078	0.00462912	0.00570942	0.00667758	0.00748032	0.00873212	0.0102728	0.0120238	0.0145246	0.0145536	0.0135233	0.0134579	0.0137261	0.0154046	0.0181507	0.021012	0.0221228	0.0213186	0.0196917	0.0175274	0.0161496	0.0160839	0.0156297	0.0156163
70602643		0.00513159	0.00515649	0.00496635	0.00530841	0.00679094	0.00897074	0.0117846	0.017048	0.0146742	0.0206242	0.0237852	0.0254197	0.0280863	0.0298925	0.029914	0.027707	0.025027	0.0229166	0.0216858	0.0227123	0.022913	0.0238843
70602713		0.00417808	0.00345762	0.00273585	0.00372252	0.00619826	0.0098889	0.0129688	0.0158506	0.0181018	0.0193314	0.01958	0.0193139	0.0190911	0.0191332	0.0193943	0.0196718	0.019362	0.0199015	0.0181648	0.01776	0.0174517	0.0191151	0.020753	0.0203768
70604485		0.00479446	0.00555752	0.00614335	0.00647698	0.0057651	0.00502639	0.00349572	0.00277018	0.00342805	0.00637877	0.00963763	0.0142797	0.0170407	0.0191863	0.0209316	0.0223663	0.0233462	0.0238053	0.0238574	0.0237909	0.024048	0.0252775	0.026091	0.0279633	0.0283039	0.0287031	0.029989	0.0290474	0.0293466	0.0278187
70604792		0.0039224	0.00341498	0.00299687	0.00325561	0.00399012	0.00454638	0.00480799	0.0051341	0.00466333	0.0054154	0.00718265	0.00926014	0.0126103	0.0138582	0.0168549	0.0171874	0.0182938	0.0187609	0.0191984	0.019613	0.019932	0.0200822	0.0196368	0.0200251	0.0210372	0.0209711	0.0216725	0.0215841	0.0213863	0.0206065
70605239		0.00388057	0.00513685	0.00593494	0.00627535	0.00617384	0.0060467	0.00637036	0.00799286	0.011341	0.015085	0.0182034	0.0207183	0.0212046	0.021583	0.0211955	0.0211463	0.021312	0.021294	0.0213531	0.0211037	0.0204212	0.0190519	0.0185804	0.0178005	0.0173032	0.0165476
70605309		0.00130654	0.00110752	0.000807779	0.00235684	0.00365145	0.00472271	0.00569976	0.0060541	0.00626393	0.00673239	0.00743579	0.00746064	0.010029	0.0132906	0.0167494	0.0194924	0.0209083	0.0201472	0.0192217	0.0214579	0.0249107	0.0254919	0.0264921	0.0265948	0.0255673	0.0257426	0.0267986	0.0265607	0.028949	0.0284743
70605476		0.00960832	0.0122652	0.014152	0.0155361	0.0154381	0.0165455	0.0184651	0.0208981	0.0221422	0.0232835	0.0236004	0.0237444	0.0231608	0.022542	0.0221124	0.0213627	0.0171653	0.013252	0.011943	0.0121343	0.0120341	0.0116415
70606844		0.00415918	0.00400197	0.00489992	0.00573979	0.00671141	0.00830166	0.0100004	0.0121336	0.0145719	0.0196644	0.0210131	0.0217126	0.0222829	0.0236673	0.0229228	0.0251329	0.027513	0.028901	0.0282862	0.0283585	0.028778	0.0273873	0.0256643	0.0231542	0.0203322	0.0184354
70607081		0.00336092	0.00285802	0.00409866	0.00485222	0.00559836	0.00650693	0.00785406	0.00953064	0.011356	0.0132886	0.0154762	0.0191644	0.0205516	0.0208797	0.0202727	0.0193547	0.0192541	0.0181624	0.0167676	0.015704	0.0156017	0.0176844	0.0203263	0.0204184	0.0211808	0.0207457
70607388		0.00389668	0.00323371	0.00252549	0.00236697	0.0028192	0.00359715	0.00454718	0.00576197	0.00740208	0.00915059	0.0106324	0.011907	0.0132964	0.0148605	0.0161984	0.0167973	0.016433	0.0163277	0.0187763	0.0221357	0.0234423	0.0232385	0.021338	0.0193496
70607905		0.00269513	0.00314802	0.00379483	0.00424613	0.00577972	0.00724565	0.00844431	0.00841366	0.00938339	0.00900998	0.00977489	0.0113301	0.0137183	0.0172808	0.0204952	0.0227961	0.0228123	0.0224092	0.0207594	0.0194894	0.0197079	0.0200257	0.019876	0.0193715	0.0189525	0.0181558	0.0160914	0.0147438	0.0134059	0.0120322
70608072		0.00135828	0.00172682	0.00228674	0.00275081	0.00335763	0.00449783	0.00550889	0.00664905	0.0059685	0.00758314	0.00846523	0.00978661	0.010403	0.0118854	0.0130531	0.0139635	0.0148429	0.0152151	0.0155228	0.0158172	0.0167184	0.0183711	0.0200255	0.0212279	0.0216368	0.0220758	0.022418	0.0223111	0.0219824	0.0212372
70608519		0.00337599	0.00396419	0.00449823	0.00463985	0.00477401	0.00510526	0.00547309	0.00595138	0.00691542	0.00811713	0.00925029	0.0102944	0.0109461	0.0129027	0.0149758	0.0160718	0.016528	0.0172596	0.0187141	0.0204313	0.0226583	0.0242982	0.0236744	0.0225512	0.0226049	0.023705	0.0247853
70608686		0.00329539	0.00313334	0.0030514	0.00270086	0.00379276	0.00525431	0.00652011	0.00809125	0.0128429	0.015886	0.0174257	0.018247	0.0197402	0.0202842	0.0200055	0.0192279	0.018089	0.0173992	0.0175632	0.0182727	0.018699	0.0189193	0.0190828	0.0196644	0.0193735	0.0199242
70609133		0.00166786	0.00208717	0.00229728	0.00264932	0.00288126	0.00303749	0.00280445	0.00328274	0.0040043	0.00494709	0.00641365	0.00724779	0.00826224	0.0104101	0.0119274	0.0146576	0.0176494	0.0203653	0.0216201	0.0218463	0.0215689	0.0216677	0.0219834	0.0227937	0.0232038	0.0234179	0.0227012	0.0198502	0.0172148	0.0149211
70609817		0.00351464	0.0032384	0.00282027	0.00248964	0.0027729	0.00355872	0.0042454	0.00462807	0.00450712	0.00471598	0.00519325	0.00654812	0.0085412	0.0110718	0.0139909	0.0160053	0.0173292	0.0195326	0.0222291	0.0246642	0.0260023	0.0253882	0.0253205	0.0229988	0.0198587	0.0184716	0.0183013	0.0185254
70609984		0.00339429	0.00267501	0.00210867	0.00238605	0.00238497	0.00248888	0.00340796	0.00398662	0.00545332	0.00509642	0.0059511	0.00800525	0.010859	0.0123457	0.0140972	0.0185114	0.0195757	0.023839	0.0274421	0.0297811	0.0307153	0.0301476	0.0298218	0.0274148	0.0254929	0.0245031	0.022622	0.0221593	0.021703	0.0218925
70610054		0.00528255	0.0048772	0.00425179	0.00366742	0.00345518	0.00325621	0.00411355	0.00566418	0.00837025	0.0110952	0.0129346	0.0137456	0.0143254	0.0143194	0.0149677	0.0167176	0.0177367	0.0195202	0.020857	0.0220028	0.0238123	0.0236416	0.0225701	0.0223938	0.022337	0.0223552	0.0222692
70610431		0.00162709	0.00104669	0.00131878	0.00211862	0.00274156	0.00318189	0.0036153	0.00398844	0.00460845	0.00501396	0.00574427	0.00623222	0.00630642	0.00612063	0.00597122	0.00599348	0.00648801	0.00788705	0.00980327	0.0136977	0.0149667	0.0163902	0.0176197	0.0183776	0.01884	0.0205668	0.0231214	0.0244268	0.0260462	0.0272143
70610975		0.0120898	0.0138651	0.0151283	0.0158816	0.0170151	0.0189937	0.0216629	0.0241259	0.0249314	0.023513	0.0220552	0.018882	0.0172744	0.0185371	0.0193463	0.0209486	0.0228952	0.0223383	0.0208296	0.0180675	0.0154454	0.0141681
70611115		0.00141336	0.00140103	0.00154882	0.0017641	0.00197333	0.00208231	0.0019333	0.00151203	0.00194031	0.00396201	0.00679447	0.00989073	0.0129076	0.0146343	0.01406	0.0157341	0.0180234	0.0193195	0.018954	0.0208202	0.0230019	0.0247317	0.0254151	0.0256865	0.024991	0.0228422	0.0214842
70611729		0.0031922	0.00309574	0.00215549	0.00202084	0.00252162	0.00335518	0.00363149	0.00418411	0.00456108	0.00431444	0.00423246	0.00408955	0.00404149	0.00511522	0.00578911	0.00672017	0.00951075	0.0110306	0.0127188	0.0162604	0.0179047	0.0194705	0.0235904	0.0239558	0.024524	0.0261661	0.0255242	0.0252669	0.0255214	0.0262175
70612036		0.00668571	0.00627115	0.00580869	0.00500581	0.00402266	0.00278388	0.00257656	0.00260074	0.00263299	0.00280325	0.00324111	0.0047107	0.00628899	0.00769723	0.0091797	0.0111008	0.0150098	0.0164348	0.0180725	0.0184567	0.0190294	0.0194658	0.0193343	0.0188296	0.0187941	0.0196274
70612413		0.00771785	0.00824644	0.0107152	0.0132572	0.0156452	0.0180161	0.020293	0.0226247	0.0234484	0.0244048	0.0261273	0.0259322	0.0236805	0.0251529	0.0238767	0.0228479	0.0217443	0.0216724	0.0203799	0.0197619	0.0198165	0.0187587	0.0160847	0.0127242	0.00961844	0.00702648
70613027		0.00296333	0.00302	0.00319954	0.00409604	0.00624127	0.00392478	0.00918351	0.0119845	0.0144849	0.0147019	0.0177614	0.0198856	0.0220694	0.0249206	0.026051	0.027367	0.0287962	0.0307173	0.0327365	0.0324207	0.0281724	0.0253398	0.024508	0.0227466	0.020611	0.018543	0.0172731	0.0151429
70613334		0.00189596	0.00177144	0.00321616	0.00412771	0.00603825	0.00698699	0.00567946	0.00722197	0.00859767	0.0104138	0.0117428	0.0135269	0.0153933	0.016245	0.0183602	0.0207148	0.0206227	0.0192455	0.0171984	0.0160602	0.0163968	0.0163959	0.01675	0.0172093	0.0176635	0.0191357	0.0215566	0.0230598
70613711		0.00209706	0.00186666	0.00211362	0.00279537	0.00439319	0.00575461	0.00516924	0.00655057	0.0075268	0.00827289	0.0107775	0.0112128	0.0137348	0.0174977	0.0191324	0.0208482	0.021352	0.0241527	0.0267977	0.028273	0.0286359	0.0286692	0.0255687	0.0244297	0.024276
70613878		0.00575807	0.00591783	0.00498794	0.00449938	0.00378185	0.0032963	0.00305977	0.00292351	0.0027023	0.00227267	0.00192752	0.00258063	0.00419178	0.00637615	0.00682076	0.00847788	0.0104102	0.00934466	0.0111921	0.0137029	0.0165058	0.0191797	0.0203915	0.0210881	0.0238189	0.0261429	0.0270463	0.0256608	0.022409	0.020534
70614185		0.00479063	0.00485911	0.00487698	0.0049988	0.00501801	0.00476149	0.00461221	0.00525913	0.00695813	0.00862511	0.0105461	0.0122837	0.0130398	0.0149354	0.0171311	0.0178462	0.018266	0.0204478	0.021784	0.0239758	0.0282328	0.0318209	0.0327134	0.0336694
70615553		0.00292271	0.00278478	0.00274275	0.00369455	0.00543192	0.00740346	0.00961849	0.0115441	0.0140098	0.0155082	0.0170795	0.0206913	0.0233058	0.0243374	0.0254968	0.0229099	0.0212829	0.0215061	0.0205651	0.0206605	0.0213058	0.0229744	0.0244979	0.0249441	0.0227501
70615623		0.00273105	0.00303694	0.00359839	0.00395466	0.00387863	0.0036374	0.00338025	0.00438235	0.0054272	0.00716048	0.00970191	0.0130952	0.0129492	0.0159505	0.0172045	0.0191807	0.0207187	0.021872	0.0229448	0.0233036	0.0234754	0.0235735	0.0238997	0.024189	0.0253311	0.0263519	0.0270386
70615790		0.00275438	0.00224506	0.00172392	0.00107407	9.39699e-05	0.00167722	0.00344856	0.00469769	0.00515046	0.00498402	0.00442025	0.00399275	0.0047628	0.00709388	0.0104657	0.0145621	0.0191372	0.0229754	0.0251248	0.0260603	0.0259421	0.0266644	0.0268758	0.0274927	0.0259362	0.022958	0.02194
70616097		0.00257773	0.00274394	0.0037627	0.00423642	0.00518178	0.00507387	0.00441378	0.00502967	0.00678552	0.00925117	0.0118428	0.0141727	0.0160883	0.0177823	0.0194878	0.0207973	0.0211328	0.0204766	0.0195279	0.0192838	0.0196071	0.0200724	0.0207043	0.020442	0.018018	0.0152934	0.0130893
70616167		0.00444372	0.00361905	0.00335112	0.00314635	0.00301754	0.00285939	0.00551763	0.00481407	0.0080392	0.0110294	0.0134604	0.0157692	0.0177448	0.0191569	0.0198313	0.0200693	0.0204147	0.0212557	0.0223245	0.0235549	0.0228045	0.0237939	0.0228792	0.0216105
70616544		0.00435938	0.00448661	0.00441962	0.00417432	0.00380706	0.00359722	0.00350017	0.00370863	0.0048048	0.00533291	0.00565381	0.00635896	0.00759742	0.00819749	0.00923602	0.00995864	0.0107286	0.0124609	0.0145425	0.0159847	0.0164927	0.0182456	0.0209464	0.023767	0.0261303	0.0279352	0.0273291	0.0233039
70616614		0.00264147	0.00321001	0.00363942	0.00406258	0.00588917	0.00719796	0.0083966	0.00955011	0.0128685	0.013965	0.015393	0.0162964	0.0169008	0.0178318	0.0185802	0.0189919	0.019538	0.019919	0.0205419	0.0213499	0.0218704	0.020955	0.0199705	0.0185278	0.0179051	0.0172691	0.0170358
70616851		0.00121016	0.000500478	0.000156605	0.00219862	0.00296397	0.00356814	0.00396351	0.0043963	0.00458776	0.00515738	0.00593007	0.00707609	0.0101509	0.0133131	0.0121584	0.0141431	0.0148441	0.0172951	0.0174171	0.0185882	0.0202037	0.0210685	0.0241112	0.0269481	0.0278775	0.0269405	0.0240779	0.022908	0.0225392	0.0216728
70617395		0.00219503	0.00244442	0.00271734	0.00286549	0.00275952	0.00243686	0.00198758	0.00144473	0.000904004	0.000475176	0.000380202	0.00167421	0.00345801	0.00562008	0.00832973	0.0115064	0.0146199	0.0172918	0.0189739	0.0192789	0.0189032	0.01801	0.0186263	0.0177425	0.0190637	0.0190275	0.0200018	0.0185893	0.0173295
70618149		0.00205729	0.00163832	0.00185292	0.00276704	0.00328167	0.00431511	0.00574211	0.00732366	0.009374	0.0118015	0.0146839	0.0155308	0.0179492	0.0216615	0.0238139	0.0248452	0.0253566	0.0249472	0.0239889	0.0235781	0.023352	0.0225041	0.0202132	0.0174678	0.016331
70618386		0.00349894	0.00289421	0.00273694	0.00233181	0.00290156	0.00339076	0.00371556	0.00336616	0.00293746	0.00276401	0.00326774	0.00467245	0.00643332	0.00856521	0.0133608	0.0150562	0.0184585	0.0211573	0.0225394	0.0230037	0.022722	0.0226169	0.0246328	0.0251324	0.0246191	0.0228896
70618526		0.00310592	0.00210464	0.001251	0.00118609	0.00158266	0.00328086	0.00300772	0.00482261	0.00660559	0.00929847	0.0103416	0.0132634	0.0149555	0.0157304	0.0168462	0.0176803	0.0185228	0.0202029	0.0221638	0.0234052	0.0232513	0.0228782	0.0225264	0.0221951	0.0215495	0.0212606
70618903		0.0016682	0.00214147	0.00261239	0.00284066	0.00308831	0.00473504	0.00708226	0.00986504	0.0124821	0.0138717	0.0164505	0.0185083	0.0207238	0.0232992	0.0252265	0.0267697	0.0291	0.0304661	0.0339399	0.0328434	0.0298115	0.0254923	0.0217749
70619517		0.0023441	0.00265113	0.00288375	0.00308025	0.00334095	0.00381834	0.00479142	0.00629033	0.00791679	0.00977087	0.0119639	0.0143982	0.0166293	0.0182553	0.0194865	0.020919	0.0223877	0.0239232	0.0239278	0.023735	0.0221116	0.0206655	0.0204912	0.0204406
70619991		0.00382515	0.00379287	0.00353421	0.00344457	0.00392092	0.0044963	0.00469043	0.00514849	0.00610807	0.00765566	0.00947428	0.011042	0.0130958	0.0152939	0.0169205	0.0188678	0.021497	0.0223274	0.0230617	0.0257843	0.0282439	0.0290679	0.0270136	0.0247582	0.0223067	0.0190929	0.0189665
70620061		0.00190629	0.0017737	0.000667214	0.00139284	0.00255838	0.00403343	0.0045359	0.0076269	0.0114059	0.0148767	0.0181674	0.0201372	0.0210697	0.0205402	0.0200674	0.0198722	0.0201142	0.0209616	0.0225666	0.0218842	0.0227765	0.0225038	0.0227488	0.0207752	0.0198183
70620675		0.00310013	0.00261969	0.00175918	0.00117041	0.00137181	0.00181215	0.00275776	0.00354632	0.00427527	0.00431802	0.00445238	0.00532157	0.00564489	0.00731789	0.00855712	0.00873141	0.0102966	0.0117721	0.0141924	0.0143681	0.0157874	0.0159879	0.0171146	0.0187733	0.0184944	0.0181899	0.017805	0.0177716	0.0183771
70620982		0.00265272	0.002522	0.00266194	0.0030483	0.00360775	0.0042188	0.00459258	0.00464565	0.00455542	0.00446479	0.00468444	0.00546076	0.00653947	0.00759714	0.00908656	0.0105823	0.0121636	0.0158713	0.0139121	0.0162867	0.0184529	0.0196607	0.0197112	0.019002	0.0187193	0.0196673	0.0207587	0.0224036
70621806		0.00469401	0.0054277	0.00595909	0.00620493	0.00603183	0.0058117	0.00550566	0.00580168	0.00540029	0.00500575	0.00522997	0.00590018	0.00707284	0.00935585	0.0128985	0.0173197	0.021997	0.0263078	0.0298698	0.0341648	0.0306003	0.0323463	0.0324807	0.0319073	0.0322282	0.0389705
70621973		0.00315496	0.0030296	0.00274025	0.00296728	0.00446299	0.00773548	0.0112475	0.014214	0.0172466	0.0192567	0.0203846	0.0218963	0.0244283	0.0277633	0.0288963	0.0298728	0.0300421	0.0296768	0.028345	0.0248559	0.0203979
70622587		0.00262665	0.00186064	0.00228992	0.002938	0.00342724	0.00400663	0.00481452	0.0060236	0.00754724	0.00906368	0.0102812	0.0118068	0.013642	0.0159166	0.0183053	0.020597	0.0219273	0.0234042	0.0233391	0.0223483	0.0221063	0.0204971	0.0210196	0.0220636	0.0238784	0.025181	0.0245261	0.0215878
70622727		0.00528178	0.00630851	0.00691204	0.00693796	0.00656785	0.00780974	0.00900093	0.0103172	0.0108783	0.0125845	0.0148476	0.0175931	0.0203218	0.0220584	0.0225119	0.0225617	0.0224374	0.024662	0.0262369	0.0262233	0.0280821	0.0292207	0.0287184	0.0274048	0.0249954	0.0219002	0.0195997	0.0156022
70623034		0.00702581	0.00622235	0.00524505	0.00421371	0.00329724	0.00264768	0.0022363	0.00184647	0.00144408	0.00152184	0.00239796	0.00371124	0.0048177	0.00661496	0.00604015	0.00771172	0.00900218	0.0113369	0.0137328	0.0160406	0.0175669	0.0181476	0.0198213	0.0195444	0.0209601	0.022622	0.023824	0.0240361	0.0238207	0.0235866
70623885		0.00668297	0.00380908	0.00690079	0.0100923	0.0130025	0.0160881	0.0200198	0.0200534	0.0256237	0.0309946	0.0339966	0.0343949	0.0322013	0.0296888	0.0273995	0.0227812	0.019466	0.0201488	0.0183845	0.0185814	0.0188369	0.0178801
70624402		0.00564492	0.00579659	0.00637794	0.00802685	0.00946022	0.0104729	0.0113061	0.0129794	0.0142195	0.0149473	0.016888	0.018571	0.0203669	0.0213881	0.0225868	0.0234236	0.0240144	0.0233549	0.0236133	0.0241804	0.0243848	0.022811	0.0244232	0.0250927	0.0234597	0.0218117	0.0190616
70625253		0.00399779	0.00436259	0.00439121	0.00429108	0.00418399	0.00453973	0.00565803	0.00537968	0.00655129	0.0081039	0.0103953	0.0140226	0.0188336	0.0237172	0.0269958	0.0281454	0.0293216	0.0306463	0.032231	0.0325826	0.0309992	0.0287704	0.0286188	0.0246799	0.0211862	0.0189333
70625630		0.00364304	0.00409824	0.00433991	0.00451111	0.00461824	0.00424169	0.00361992	0.00365801	0.00515042	0.00764587	0.0106559	0.0137962	0.0164464	0.0180314	0.0187015	0.0191507	0.0198903	0.0209293	0.0220301	0.0223048	0.0227407	0.0234363	0.0239934	0.0243622	0.0237245
70625867		0.00169411	0.00214241	0.00273971	0.00325723	0.00346502	0.00281164	0.00205033	0.00201056	0.00327819	0.0051627	0.00488383	0.00607771	0.00759488	0.00921966	0.0109151	0.015119	0.0160888	0.0180751	0.0232862	0.0215538	0.021605	0.0224983	0.0235935	0.0246682	0.0253156	0.0251364	0.0255865
70626007		0.0036391	0.00374439	0.00353376	0.00297396	0.00238094	0.00174109	0.00171019	0.00369603	0.00598532	0.00852759	0.0109505	0.0129256	0.0143602	0.0155511	0.0170069	0.0189896	0.0199355	0.0210685	0.02323	0.0245768	0.0250172	0.0249963	0.0243364	0.0224128	0.0204937	0.0196182	0.0193444	0.0191397
70626314		0.00409278	0.00419109	0.00386547	0.00374388	0.00396707	0.00606775	0.00516056	0.0065719	0.00753086	0.00863659	0.010054	0.0121376	0.0135779	0.0154408	0.0185046	0.0215535	0.0232941	0.02355	0.0231883	0.0221723	0.021492	0.0198512	0.0151429	0.0125547	0.0120896
70626551		0.00345554	0.0039933	0.00453192	0.00491669	0.00503637	0.00499933	0.00518001	0.00654892	0.00822353	0.0103962	0.0129078	0.0156116	0.0183062	0.0207037	0.0225105	0.0234802	0.0233597	0.0225535	0.0232691	0.0223835	0.0226079	0.0230411	0.0225507	0.0220478	0.020409	0.0181138	0.0171798
70626621		0.00473948	0.00447303	0.00431521	0.00549586	0.00465511	0.00330574	0.00216092	0.00163529	0.00196463	0.00270514	0.00354558	0.00448765	0.00572583	0.00706791	0.00823944	0.00962843	0.0103806	0.0129343	0.0147662	0.0160356	0.017006	0.0176009	0.017973	0.0180126	0.017195	0.0159231	0.015328	0.0149382	0.015107	0.016016
70626788		0.00811814	0.00698856	0.00580859	0.00459837	0.0033942	0.00234579	0.00154736	0.00117664	0.00135864	0.00095194	0.00159434	0.00237956	0.00326693	0.0042724	0.00545526	0.00458501	0.00602104	0.0077881	0.0103646	0.0137608	0.0172072	0.0198145	0.0210664	0.0211137	0.0206585	0.0207775	0.0213722	0.0220876	0.0222783	0.0234305
70627612		0.00313255	0.00281091	0.00237685	0.00183806	0.00182624	0.0026162	0.00358548	0.00353483	0.005111	0.00748569	0.00916237	0.0100705	0.0106714	0.0135333	0.0167047	0.0186042	0.0203911	0.0215758	0.0244979	0.0273327	0.0283507	0.0272145	0.0272058	0.0257362	0.0246583	0.0223756
70628603		0.00375528	0.00324942	0.00232819	0.00212155	0.00164724	0.00208665	0.00225248	0.00248384	0.002649	0.00271415	0.00302202	0.00366179	0.00266754	0.00398218	0.00651153	0.00954198	0.0117696	0.0127718	0.0111215	0.0126458	0.0146571	0.0165806	0.0180801	0.0193152	0.0184059	0.0190181	0.0199845	0.0202865	0.0195895	0.0189828
70628840		0.00425384	0.00346893	0.00297681	0.00305235	0.00366161	0.00377727	0.00372658	0.00425017	0.00468522	0.0056134	0.0061573	0.00628995	0.00480075	0.00385577	0.00422776	0.00600018	0.00801896	0.00935502	0.0105875	0.0116618	0.0126422	0.0157908	0.0187	0.0213656	0.0232655	0.0238449	0.0254275	0.0254879	0.0252139	0.0242099
70629454		0.00385163	0.00427527	0.00476335	0.00585824	0.00761298	0.00968587	0.011846	0.0139118	0.0158543	0.0176692	0.0187818	0.0194152	0.0195019	0.0194376	0.019785	0.0199763	0.0202848	0.0201589	0.0205759	0.0212042	0.0206879	0.0203766	0.0193175
70630068		0.00349436	0.00249546	0.00201427	0.00182943	0.00184043	0.00190585	0.00211523	0.00275227	0.00312886	0.00382269	0.00527687	0.00764087	0.010177	0.0126745	0.0151634	0.0171357	0.0184916	0.0191466	0.0189379	0.0161498	0.0151737	0.014099	0.0140834	0.0146757	0.0155732	0.017283	0.019517	0.0202426	0.0215013	0.0215187
70630989		0.0021269	0.001653	0.00115249	0.000732156	0.00039271	0.00114224	0.00217264	0.00329699	0.00302761	0.00319606	0.00275712	0.00309508	0.0039173	0.00390788	0.00399545	0.00474406	0.00453773	0.00843115	0.0090108	0.0150928	0.0172621	0.0231357	0.0277773	0.029301	0.0272925	0.0238109	0.0226653	0.0198824	0.0190138	0.0198194
70631059		0.00254183	0.00282119	0.0029623	0.00247364	0.00274037	0.00304381	0.00345409	0.00336233	0.00382203	0.004678	0.00605923	0.0076115	0.0104732	0.012811	0.0155467	0.0183105	0.020508	0.022778	0.0233859	0.0235663	0.0241232	0.0250303	0.025487	0.0250287	0.0240091	0.022963	0.0223401	0.0207336
70631366		0.00258849	0.002678	0.0027236	0.00280699	0.0028375	0.00280912	0.00262908	0.00177397	0.0016133	0.00200939	0.00307183	0.00452279	0.00644041	0.00891243	0.0114915	0.0141181	0.0163329	0.0192166	0.0202959	0.0203789	0.0197464	0.019099	0.0192198	0.0202625	0.0209796	0.0216198	0.0206026
70631506		0.00341836	0.00349024	0.0041279	0.00507434	0.00591051	0.00640107	0.00597672	0.00590394	0.00550061	0.00516646	0.00519166	0.00562352	0.00584998	0.00776138	0.00940004	0.0125954	0.0153369	0.0175026	0.0186681	0.0196348	0.0188724	0.0179594	0.019372	0.0218308	0.0224338	0.0215192	0.0194115	0.0180858	0.0173455	0.017134
70632287		0.00258213	0.00205338	0.00233396	0.00293478	0.00267137	0.00270897	0.00269696	0.0027719	0.00313221	0.00384638	0.00506475	0.00653765	0.00762153	0.00839007	0.00899077	0.00992669	0.0098698	0.0117789	0.0134094	0.0173643	0.0223091	0.0256675	0.0262865	0.0281677	0.0290267	0.0293842	0.0280522	0.0246836
70632971		0.00279009	0.0012822	0.000860082	0.00182283	0.00262652	0.00350545	0.00426725	0.0055471	0.00856308	0.0103204	0.0120686	0.014336	0.0175299	0.0181463	0.0221444	0.0234645	0.0232661	0.0230775	0.0226947	0.0217767	0.0230224	0.0219997	0.0222466	0.0234357	0.0231677	0.0238118	0.0232201	0.0237475	0.0259586	0.0270889
70633278		0.00232664	0.00293851	0.0035839	0.00541039	0.00708694	0.0078148	0.00753107	0.00679346	0.0057898	0.00492316	0.00439964	0.00514843	0.00720008	0.0097633	0.0123881	0.0148413	0.017072	0.0192293	0.021552	0.0238596	0.0261489	0.0248927	0.0265333	0.0240299	0.0254674	0.0229484	0.023678	0.0237658	0.0228526
70633418		0.00369487	0.00358979	0.00325036	0.00279414	0.00234946	0.00215768	0.0021085	0.00295734	0.0045172	0.00693045	0.0102048	0.0142405	0.0182217	0.0214097	0.0225048	0.0216083	0.020949	0.0238857	0.0256225	0.0271802	0.0280298	0.0271328	0.0237174
70633585		0.00561304	0.00551084	0.0054396	0.00536923	0.00509592	0.00461063	0.00420792	0.00400595	0.0040378	0.0047356	0.00556594	0.00609279	0.00638902	0.00695581	0.00877893	0.00882409	0.00881029	0.00944006	0.0108122	0.0129266	0.0153823	0.017825	0.0181911	0.0184309	0.0181521	0.0182221	0.0196309	0.0202718	0.021858	0.0221839
70633655		0.00814842	0.0100193	0.0120354	0.0138933	0.0150827	0.0146968	0.0158709	0.0171385	0.0184389	0.0216315	0.0247453	0.0257358	0.026421	0.0239802	0.0249203	0.0234632	0.0244971
70633892		0.00222924	0.00222419	0.00226742	0.0023425	0.00254827	0.00291962	0.0033525	0.00366841	0.00349938	0.00331015	0.00342503	0.00419894	0.00568744	0.00779308	0.0105085	0.0136054	0.0164072	0.0184072	0.0197318	0.019891	0.0212927	0.0225399	0.0218775	0.0206368	0.0189027	0.0169462	0.015586	0.0142454
70634646		0.00442241	0.00302042	0.00279964	0.00258389	0.00264715	0.00311881	0.00229657	0.00240423	0.0025027	0.00293181	0.00425255	0.00523228	0.00581676	0.00634571	0.00783705	0.0112272	0.0161521	0.0203728	0.0235571	0.025428	0.0253893	0.0241854	0.0237148	0.0250166	0.0269503	0.0277334	0.0275707	0.024084	0.0229047	0.0209976
70635330		0.00285495	0.00280877	0.00291801	0.00313686	0.00333314	0.00363448	0.00482868	0.00574161	0.0066174	0.00596579	0.00678059	0.00689643	0.00735394	0.00811825	0.0081793	0.00996077	0.0114891	0.0129452	0.0142881	0.0151529	0.0155271	0.0151178	0.014762	0.0146908	0.0149225	0.0153669	0.0160765	0.0166437	0.0173452	0.0189682
70635944		0.00537306	0.00531564	0.00513263	0.00453151	0.00383234	0.00529632	0.0047656	0.00429435	0.00403199	0.00430213	0.00539125	0.0047183	0.00576898	0.00812977	0.00854738	0.0115243	0.0161009	0.0177995	0.0193997	0.0203489	0.0235272	0.0254865	0.0291983	0.0294481	0.0278693	0.0257575	0.0254995	0.0239133	0.0238909	0.0249956
70636321		0.00487443	0.00454547	0.00388351	0.00332647	0.00234515	0.00186955	0.00162771	0.000579379	0.000607545	0.00334401	0.00488533	0.00869926	0.00701141	0.00891349	0.010307	0.0133385	0.0165902	0.0189818	0.0206933	0.0223267	0.0225047	0.0218189	0.021205	0.0218551	0.0238174	0.024146	0.0238505
70636865		0.00113137	0.00148413	0.00228668	0.00359046	0.00484439	0.00554041	0.00751439	0.0098528	0.0118451	0.0134027	0.014538	0.0173451	0.021502	0.0220489	0.0236833	0.024315	0.0238553	0.0226716	0.0215276	0.0211105	0.0221551	0.0218507	0.0209431	0.0189309
70636935		0.00266091	0.00303018	0.00304137	0.00353827	0.00434298	0.00482645	0.00499292	0.00504496	0.00513635	0.00450068	0.00367217	0.00251847	0.00256332	0.00447122	0.00685068	0.00923388	0.0116994	0.0155799	0.0175431	0.0185963	0.0204783	0.022065	0.023145	0.0231639	0.0222912	0.0227256	0.0235176	0.023973	0.0253775	0.025697
70637856		0.00502354	0.00525224	0.00538409	0.00530105	0.00492257	0.00450445	0.00513861	0.0100704	0.0125323	0.0146146	0.0161093	0.0159184	0.0178303	0.0199429	0.0213451	0.0221473	0.0232145	0.0243834	0.0269158	0.0281419	0.0301951	0.0280442
70639768		0.00469107	0.00497936	0.00507581	0.004845	0.00398046	0.00364616	0.00333877	0.00326098	0.00361878	0.0045149	0.00594933	0.00786724	0.0101235	0.0127518	0.0152376	0.0167395	0.0187568	0.0220166	0.0274265	0.0292682	0.0294393	0.0296792	0.0275644	0.0251745	0.022195	0.0192276	0.0162197	0.0135226
70639908		0.00221487	0.00221385	0.00208799	0.00168573	0.00137026	0.00117171	0.00101512	0.00041135	0.00114638	0.00117014	0.00230284	0.00367573	0.00493366	0.00696977	0.00865297	0.0124165	0.0139824	0.0163095	0.0197838	0.0218718	0.0239192	0.0241625	0.023395	0.023019	0.023052	0.0223919	0.0208673	0.020295	0.0188876
70640145		0.00417135	0.00352299	0.00316939	0.00309429	0.00289257	0.00331664	0.00367187	0.00372857	0.00394149	0.00456706	0.00501567	0.00508391	0.00446657	0.00436649	0.00467174	0.0058366	0.00787536	0.0107148	0.013625	0.0163427	0.017412	0.0185761	0.0187576	0.0190517	0.0216414	0.0233393	0.0235076	0.0252789	0.0250583	0.0253091
70640522		0.00247477	0.00230137	0.00258623	0.00319403	0.00405022	0.0050015	0.00602486	0.00708282	0.00974941	0.0109367	0.012702	0.014234	0.0150006	0.0155328	0.0154251	0.0173675	0.019866	0.0207307	0.0190841	0.0180876	0.0177036	0.0181902	0.0195089	0.0216875	0.022153	0.0216357	0.0190567	0.0165137	0.0134576
70642504		0.00610316	0.0053159	0.00465922	0.00349881	0.00220924	0.00153096	0.00183577	0.00158363	0.00210087	0.002214	0.00257518	0.00274025	0.00434755	0.00371585	0.00529479	0.00791632	0.0100318	0.0130196	0.0136643	0.0148659	0.0185572	0.0218527	0.0264499	0.0307083	0.0312264	0.0324231	0.0293719	0.0261655	0.0228669
70643662		0.00350216	0.00298383	0.00415148	0.00460945	0.0051182	0.00567112	0.00650571	0.00805881	0.0108169	0.0146565	0.0187455	0.0218558	0.0235362	0.0242479	0.025128	0.0247309	0.0243833	0.0251206	0.0233738	0.0218448	0.0208953	0.020731
70644723		0.00433602	0.00559162	0.00738189	0.0105915	0.0152787	0.018346	0.0210652	0.0231834	0.0248859	0.0262208	0.0268033	0.0256335	0.023201	0.0208246	0.0184739	0.0174404	0.0174535	0.0168713	0.0168736
70644890		0.00315124	0.00295417	0.00274465	0.00261804	0.0024977	0.00248821	0.00287026	0.00376014	0.00491072	0.00638465	0.00817801	0.00985001	0.0104978	0.0120409	0.0125286	0.0145532	0.0168744	0.0182984	0.0196863	0.020759	0.0210199	0.0218632	0.0196632	0.0200487	0.0185612	0.018435	0.0171525	0.0163953	0.0159595	0.0145781
70645030		0.00450638	0.00428209	0.00460787	0.00547446	0.00667129	0.0079861	0.00942284	0.0110267	0.0126924	0.0145703	0.0169224	0.0192475	0.0205792	0.0210673	0.0209481	0.0225001	0.0225009	0.0236449	0.0237773	0.0233745	0.0236062	0.0232174	0.0230737	0.0223173	0.0217329	0.0200901
70645267		0.0054352	0.00492757	0.00458913	0.00428829	0.00368791	0.00443315	0.00260739	0.00163029	0.00448488	0.00852692	0.0130432	0.0171032	0.0200786	0.0197002	0.0211959	0.0217579	0.021371	0.0208773	0.0200046	0.0199461	0.0178877	0.0175014	0.0185948	0.0208593	0.0235659	0.0245458
70645644		0.00225541	0.00195037	0.00165146	0.00113813	0.000543229	0.000998642	0.000816452	0.00151359	0.00216324	0.00266791	0.00284772	0.00265438	0.00277681	0.00371979	0.00496913	0.00650832	0.00836919	0.0103876	0.0122087	0.0140161	0.0151732	0.0162509	0.0174619	0.018825	0.0202705	0.0222365	0.0249633	0.0268193	0.0304045	0.0337938
70646942		0.00214615	0.00222052	0.00245256	0.00315236	0.00424969	0.00504493	0.00495753	0.00533719	0.00620925	0.00711804	0.00797916	0.00880819	0.00971697	0.0109282	0.0124394	0.0138338	0.0149759	0.0140091	0.0161923	0.018965	0.0214459	0.0236693	0.0254546	0.0269225	0.0278275	0.028586	0.0295348	0.029015	0.0288832	0.0266509
70647179		0.0022254	0.00192748	0.00206063	0.00334391	0.00492878	0.00522242	0.00520625	0.00454257	0.00471478	0.00666743	0.00978982	0.013615	0.0172814	0.0197907	0.0209852	0.0216667	0.0216379	0.0217445	0.0226929	0.0231719	0.024114	0.0237303	0.0229056	0.02226	0.0210144
70647486		0.00264121	0.00270459	0.00347573	0.00436533	0.00510316	0.00508626	0.00567259	0.00634898	0.00775786	0.00984272	0.0129683	0.0165867	0.0202717	0.0222963	0.0231834	0.0236917	0.0242111	0.0254796	0.0245504	0.0230099	0.0218143	0.0192814	0.0182462	0.0175584	0.01572
70647626		0.00330954	0.00308384	0.00274938	0.00328341	0.00326758	0.0035238	0.00393836	0.00394072	0.00594256	0.00431179	0.00661569	0.0075678	0.00806626	0.00947958	0.0110315	0.0120422	0.0129207	0.0129357	0.0137579	0.0152643	0.0173232	0.0206122	0.0243377	0.0264919	0.0280773	0.029742	0.0315062	0.0330829	0.0326529
70648003		0.00221889	0.00197365	0.00163535	0.00171665	0.00199096	0.00248616	0.00331744	0.00367716	0.00347314	0.00322019	0.00307476	0.00201257	0.00156124	0.00246137	0.00504842	0.00718528	0.00879879	0.00949241	0.0120791	0.0139374	0.0186461	0.0195719	0.0191126	0.0169358	0.0172003	0.0169489	0.0179758	0.0194546	0.0200915	0.0205054
70648854		0.00135274	0.00138346	0.00151077	0.00245373	0.00447614	0.00606028	0.0072017	0.00802174	0.0142189	0.0173168	0.0188648	0.0190503	0.0184835	0.0185961	0.0194447	0.0202576	0.0204339	0.0207226	0.0206304	0.0194516	0.0200377	0.0187517	0.0181554	0.0169014	0.0160184
70649468		0.00344709	0.00304115	0.00275369	0.0026304	0.0027308	0.00298789	0.00318818	0.00361514	0.00336402	0.00411732	0.00511909	0.00484918	0.00597486	0.00751246	0.00902224	0.00854305	0.0111062	0.0149897	0.0184431	0.0232372	0.0274839	0.0312657	0.0351253	0.0346894	0.0317206	0.0283249	0.0266955
70649608		0.00441624	0.00379454	0.00292046	0.00275697	0.0022433	0.00230475	0.00248048	0.00369023	0.00332083	0.00392218	0.00540289	0.00535431	0.00680274	0.00730172	0.00886874	0.00998174	0.0104042	0.0116781	0.0126117	0.0134361	0.0138793	0.0157829	0.0175933	0.0197507	0.0232049	0.0251052	0.0258997	0.0265507	0.0261081	0.026387
70650459		0.0028238	0.00254597	0.00287748	0.00335421	0.0034016	0.00288391	0.00230166	0.00172987	0.0028343	0.00479604	0.00713258	0.00980961	0.0126668	0.0156108	0.0187769	0.0216164	0.0231209	0.0232295	0.0239704	0.0264692	0.029526	0.0299152	0.0286534	0.0273795
70650836		0.00290001	0.00329404	0.00360788	0.00378437	0.00392007	0.00410668	0.00445574	0.00510061	0.00611647	0.00739564	0.00888429	0.0133947	0.0131419	0.0150336	0.0166075	0.0177148	0.0179931	0.0199166	0.0194535	0.0206718	0.020815	0.0209064	0.0207073	0.0199808	0.0189853	0.0189047	0.018505	0.0189734	0.0189759
70651380		0.00220484	0.0022921	0.00294758	0.00439737	0.00538014	0.00625162	0.00735248	0.00753124	0.00807218	0.00844288	0.00899149	0.00989227	0.0109339	0.0121775	0.0115079	0.0130026	0.0138586	0.016144	0.0166998	0.0192824	0.0216152	0.0231562	0.0244306	0.0249541	0.0235324	0.0236686	0.0232481	0.0223622	0.022047	0.0221473
70651994		0.00304712	0.00267514	0.00266869	0.00258653	0.00248372	0.00257425	0.00307107	0.00417734	0.00459226	0.00624135	0.00900318	0.0137723	0.0177482	0.017533	0.0204496	0.0223463	0.022916	0.0241804	0.025838	0.0277579	0.028155	0.0274492	0.0262522	0.0252378	0.0246531	0.023615
70652064		0.00329338	0.00239832	0.00320214	0.0030527	0.00554972	0.00790558	0.00968225	0.0129166	0.0141592	0.016656	0.0185316	0.020866	0.0210075	0.0230395	0.0243021	0.0261935	0.0244426	0.0213383	0.0180942	0.0166512	0.0146253	0.0131078	0.0121791	0.011699
70652204		0.00283564	0.00299665	0.0039191	0.00383134	0.00296374	0.00221726	0.00392857	0.00713024	0.0105769	0.0138224	0.0165426	0.0185468	0.0200655	0.0218128	0.0232335	0.0229036	0.0226592	0.0228328	0.0228024	0.0230818	0.0226273	0.0216348	0.0204416	0.0190065	0.0170174
70652371		0.00486459	0.0043169	0.00367718	0.00372993	0.00484055	0.00546691	0.00544149	0.00543759	0.00431622	0.00374682	0.00297637	0.0020293	0.00113665	0.00104733	0.00168235	0.00257052	0.00374862	0.00532013	0.00717565	0.00926779	0.0118996	0.0151281	0.0192093	0.0227511	0.0254939	0.0271887	0.0281593	0.0281652	0.0266525	0.0245846
70652818		0.00561814	0.00591708	0.00632999	0.00696068	0.00774569	0.00838973	0.00854766	0.00878492	0.00946414	0.0106603	0.012421	0.0145618	0.0165602	0.0181312	0.0201237	0.0230231	0.0268859	0.0289968	0.0297933	0.0317209	0.0313386	0.035086	0.0361963
70653502		0.00319093	0.00273181	0.00224043	0.00202298	0.00187641	0.00304929	0.00483126	0.00739268	0.0103708	0.0136251	0.0169348	0.0198679	0.0223744	0.0247634	0.0265518	0.0260318	0.0248238	0.0231691	0.0212398	0.0196879	0.0175172
70653809		0.00452152	0.00505784	0.00493336	0.00545682	0.0058172	0.00596788	0.00583261	0.00551417	0.00528125	0.00482918	0.004183	0.00365393	0.00342909	0.00373058	0.00431782	0.00501243	0.0058738	0.00743975	0.00917792	0.0103198	0.0127285	0.014563	0.0155553	0.0163718	0.0209309	0.0260771	0.0281455	0.03208	0.033604	0.0341369
70653976		0.00262007	0.00215723	0.00210698	0.00228788	0.00264479	0.00283629	0.00292967	0.0028378	0.00322337	0.00325878	0.00401747	0.00508598	0.00671307	0.00735523	0.0101643	0.0143459	0.0152931	0.0168092	0.0162732	0.0149795	0.0166591	0.0185688	0.020881	0.0214673	0.0212406	0.0209173	0.0210408	0.0208033	0.0201298	0.0205075
70654353		0.00334177	0.00254619	0.001962	0.00162675	0.00169803	0.00160982	0.00191334	0.00224022	0.0025172	0.00302299	0.00357274	0.00424167	0.00530873	0.0065212	0.0082838	0.00961979	0.0119962	0.0147686	0.016904	0.0181594	0.0188315	0.018578	0.0188688	0.01896	0.0189776	0.019308	0.0196664	0.0191202	0.0189527	0.0183016
70654897		0.00429957	0.00406424	0.00432381	0.00431379	0.00365652	0.00314327	0.0029761	0.00322434	0.00396687	0.00445479	0.00482916	0.00501335	0.00546399	0.00642567	0.00732378	0.00840627	0.0104016	0.0129044	0.0151727	0.0168763	0.0179467	0.018166	0.0182062	0.0179514	0.018803	0.0195574	0.0204059	0.0203248	0.0193623	0.0188
70656335		0.00386117	0.00489418	0.00524467	0.00490565	0.00406184	0.00300477	0.0028691	0.00442714	0.00577818	0.00845988	0.0113373	0.0142223	0.0170346	0.0190903	0.0203345	0.019922	0.0189145	0.018408	0.0189706	0.0203668	0.0215654	0.0193588	0.01818	0.0208066
70656405		0.00108804	0.00167819	0.00238733	0.00262086	0.00446348	0.00541046	0.00649186	0.00844268	0.011062	0.0141344	0.0171226	0.0194662	0.0209449	0.0216749	0.0228085	0.0250881	0.0267331	0.0264271	0.0256764	0.0247228	0.0241068	0.0246927	0.0231823
70656949		0.0025471	0.0028017	0.00306261	0.00308069	0.00288753	0.0030232	0.00305348	0.00305876	0.0032359	0.00360291	0.00422351	0.00508549	0.00574629	0.00646113	0.00771313	0.00978769	0.0123914	0.0149399	0.017089	0.018941	0.0206529	0.0217587	0.0223097	0.022695	0.0236473	0.0250214	0.0256466	0.0242515	0.0227788	0.0209709
70657563		0.00686592	0.0058589	0.0067372	0.00823313	0.00999321	0.0115735	0.0132894	0.0157283	0.0185574	0.0208696	0.0214842	0.0213574	0.0209071	0.0198997	0.0197162	0.0186995	0.0169336	0.0171984	0.0167233	0.0184979	0.0190411	0.0197211	0.0201019	0.019966	0.0194764	0.018388
70658247		0.00389348	0.00413893	0.00460383	0.00637464	0.00984935	0.013971	0.017973	0.0209422	0.0226089	0.0228636	0.0226529	0.022083	0.0212811	0.0208317	0.0208467	0.0212484	0.021088	0.021087	0.0202151	0.0185567	0.0183798	0.0163926
70658554		0.0021478	0.00245212	0.00275011	0.00318482	0.00367661	0.00400292	0.00357983	0.00401282	0.00412497	0.00416651	0.00380824	0.00387178	0.00377853	0.00403063	0.00434764	0.00535589	0.00686518	0.00852142	0.0109384	0.0137269	0.0172122	0.0210751	0.0243281	0.0246923	0.0231311	0.0207983	0.021052	0.0222571	0.0238678	0.0246295
70658624		0.00400212	0.00446794	0.00479458	0.00409923	0.00424029	0.00387816	0.00338977	0.00347429	0.004549	0.00940987	0.0118691	0.014439	0.0170092	0.018973	0.0191298	0.0210047	0.0218339	0.020959	0.0202643	0.0200018	0.0200464	0.0192067	0.0194475	0.0183851	0.0181653	0.0188882	0.0196585	0.0196428
70659168		0.00495575	0.0053808	0.00439345	0.00315942	0.0017655	0.0023961	0.00537109	0.00408053	0.00788327	0.0121719	0.0164398	0.0184466	0.0202282	0.0221888	0.0226292	0.0216557	0.0212394	0.021724	0.0220713	0.0216767	0.021695	0.0207703	0.0209422	0.0210337	0.0208968
70659922		0.00630279	0.00711759	0.00929203	0.0123403	0.0150939	0.0169718	0.0183263	0.0205535	0.0219379	0.0228016	0.0223898	0.0222064	0.0229768	0.022615	0.0241702	0.0252307	0.0252623	0.0246021	0.0221883	0.0211604	0.0185027	0.0153467	0.0130966	0.0121983
70660159		0.00363101	0.00251321	0.00294449	0.00132817	0.00284673	0.00144639	0.00246138	0.00248852	0.0037125	0.00608998	0.00975695	0.0134715	0.0172058	0.0204607	0.0222745	0.0219758	0.0201335	0.0207812	0.0218714	0.0229002	0.0245871	0.027298	0.0287917	0.0288485	0.026013	0.0233105	0.0195251	0.0168597	0.0156608
70660229		0.00208927	0.00272589	0.00208378	0.00241071	0.00297876	0.00427439	0.00577663	0.00701578	0.00776896	0.0084392	0.00979872	0.00853681	0.0112948	0.0127131	0.0137327	0.0164367	0.0191885	0.0218897	0.0235634	0.0259203	0.0272041	0.0267903	0.0276992	0.0260114	0.0247194	0.0240397
70660536		0.00403903	0.00382007	0.00383438	0.00372639	0.00277109	0.00242989	0.00217536	0.00190582	0.00142595	0.00171124	0.00180587	0.00239023	0.00342896	0.00532597	0.00795444	0.0105161	0.01352	0.0162519	0.0197374	0.0223136	0.0239045	0.0249624	0.0254433	0.0250983	0.0255733	0.0256894	0.025424	0.024112	0.0230439	0.0224618
70660843		0.00503549	0.00511605	0.00514997	0.00495851	0.00447684	0.00387042	0.00351136	0.00355237	0.003736	0.00430489	0.00604043	0.0088481	0.0122167	0.0164885	0.0213968	0.025634	0.0277542	0.0281536	0.0261841	0.0233476	0.0238928	0.0235751	0.0248821	0.0248297	0.0246236	0.024625	0.0249054	0.0246475
70661834		0.00359607	0.00334364	0.00352635	0.00409445	0.00463874	0.00501372	0.00522493	0.0053863	0.00568136	0.00603996	0.00624456	0.00633216	0.00589492	0.00740709	0.00889944	0.0117972	0.0158216	0.0194593	0.0209718	0.0210784	0.0206735	0.0204595	0.0203051	0.0210474	0.0213322	0.0208117	0.0193036	0.0182364	0.0172127
70662211		0.000944931	0.00103216	0.0026247	0.00366467	0.00401226	0.00391643	0.00370419	0.00387242	0.00477951	0.00660225	0.00900809	0.011262	0.0127115	0.0118973	0.0127358	0.0151358	0.0177921	0.0206993	0.023743	0.0264785	0.0251225	0.0252661	0.0248347	0.0228037	0.020099	0.017347	0.0153255	0.0152086	0.0152574	0.0138065
70662518		0.000234042	0.000853655	0.0017389	0.00324496	0.0059139	0.00972288	0.0138939	0.0168999	0.0185264	0.0193414	0.0188358	0.0182651	0.018446	0.0184603	0.0191269	0.0187139	0.0199968	0.0201327	0.0218361	0.0254018	0.0235202	0.0232496	0.0219425	0.0169901	0.0157361	0.0167159	0.0192934
70663062		0.00353827	0.00369816	0.00447997	0.00415486	0.0050542	0.00567276	0.00640923	0.00704177	0.00790108	0.00942467	0.0110159	0.0124203	0.0133677	0.0133895	0.0129909	0.0135793	0.0144344	0.0166506	0.0187676	0.0196816	0.0227468	0.0246679	0.0257241	0.0249061	0.0245781	0.0217587	0.0208729	0.0200886	0.0200515	0.0197092
70663132		0.00452395	0.00473626	0.00494382	0.00474111	0.00433193	0.00468372	0.00448289	0.00439658	0.00447735	0.00475654	0.00663613	0.00976207	0.0130822	0.0149596	0.0174195	0.0187114	0.0196627	0.0202018	0.0188617	0.0194452	0.019822	0.0200768	0.0221609	0.0197109	0.0208518	0.0213285	0.0208653	0.0196502	0.0184418	0.0182783
70663746		0.00509799	0.00466842	0.0043814	0.00390653	0.00351819	0.00371816	0.00402096	0.0044208	0.00452932	0.00486209	0.00571131	0.00695615	0.00884785	0.0111842	0.0139548	0.0170769	0.0197207	0.0217261	0.0226923	0.0241783	0.0238541	0.0240355	0.0246168	0.0248551	0.0251584	0.0251652	0.0249468
70663816		0.00336957	0.00305704	0.0023976	0.00234226	0.00278061	0.0033676	0.00396836	0.00463048	0.00545941	0.00642226	0.00730868	0.00806069	0.00937115	0.0118286	0.0139757	0.0154347	0.0177075	0.0193904	0.0192364	0.0167226	0.0140854	0.012206	0.0117018	0.0123071	0.0131643	0.0146058	0.0172337	0.0193577	0.0200099	0.0210858
70664430		0.00350026	0.00354755	0.00364708	0.0039339	0.00452807	0.00540657	0.0060741	0.00646607	0.00691481	0.00771523	0.00893813	0.0107642	0.013121	0.0153575	0.0166774	0.0167755	0.0164339	0.0166642	0.018402	0.020055	0.0208407	0.0202451	0.0190768	0.0183229
70664737		0.00355703	0.00280543	0.00187988	0.0013427	0.00155292	0.00177319	0.00248413	0.00302421	0.00322763	0.00359153	0.00460159	0.00608218	0.0081155	0.0110565	0.0148781	0.0192685	0.0221608	0.0246295	0.0255675	0.0257676	0.0271254	0.0280116	0.0282285	0.0268541	0.0256295
70665281		0.000878195	0.000644529	0.00179327	0.00340308	0.00562808	0.00415255	0.00843852	0.00969787	0.0130775	0.0165956	0.020057	0.0229302	0.0232413	0.0215395	0.0215826	0.0195275	0.0194201	0.0214862	0.0221065	0.024608	0.0257407	0.0247446	0.0233187	0.0206309
70665728		0.00310028	0.00334145	0.00220438	0.0034439	0.0031934	0.0032421	0.00361481	0.00419926	0.00439073	0.00423759	0.00487244	0.00698217	0.00994136	0.0129212	0.0146123	0.0150299	0.0159454	0.0167615	0.0171713	0.0178871	0.0188562	0.020079	0.0221717	0.025536	0.0284128
70665965		0.00234505	0.00292536	0.00352706	0.00323442	0.00310242	0.0035721	0.0030812	0.00323286	0.00328545	0.00443963	0.00445461	0.00592782	0.00883977	0.0121816	0.0153017	0.0142397	0.017923	0.0213255	0.0225399	0.0237357	0.0229279	0.0233847	0.0233151	0.0241746	0.0246393	0.0241091	0.0229741	0.02245
70666035		0.00432193	0.0047961	0.00524307	0.00571279	0.00612434	0.00619953	0.00667659	0.00714916	0.00765188	0.00796196	0.00792449	0.00836781	0.00962559	0.011767	0.0137863	0.0159755	0.0167189	0.0175162	0.0184284	0.0195229	0.0205463	0.0204482	0.0196372	0.0200714	0.0203533	0.0213051	0.0221295	0.0219613	0.0206167
70667570		0.00242336	0.00196186	0.00186899	0.00203927	0.0025918	0.00329144	0.0037905	0.00400929	0.00412667	0.00447937	0.00447151	0.00432957	0.00530965	0.00982396	0.014406	0.0115779	0.0162093	0.0181556	0.0172493	0.0210056	0.0200676	0.0195409	0.0221768	0.0248767	0.0272099	0.0279201	0.0283002	0.0259189	0.0290347	0.0235621
70668184		0.00597531	0.00548361	0.00463173	0.00410433	0.00434886	0.00629533	0.0088591	0.0113468	0.013462	0.0148468	0.0163023	0.0183612	0.0208386	0.0207527	0.0218746	0.023829	0.0263535	0.0279942	0.0278589	0.0254512	0.0222159	0.0201868	0.0184652
70668491		0.00136318	0.0019081	0.0022058	0.00253517	0.00318902	0.00420483	0.00562885	0.00722034	0.00772062	0.00644462	0.00765769	0.00715583	0.0082023	0.00805031	0.00955017	0.0113214	0.0129655	0.0148904	0.0178176	0.0213967	0.0244171	0.0257133	0.0257556	0.0259981	0.0265123	0.0260879	0.0245017	0.0228819	0.0218442
70669175		0.00468909	0.00490329	0.00581387	0.00695985	0.00829728	0.00982703	0.011292	0.0125716	0.0137752	0.0152116	0.0171061	0.0193957	0.0218525	0.0229606	0.0221865	0.021491	0.0213608	0.0206666	0.0186717	0.0190754	0.0173601	0.0201329	0.0198521	0.0202903	0.0212685
70669482		0.00178158	0.00149593	0.00222556	0.00273293	0.00330967	0.00366594	0.00385594	0.00435586	0.00510692	0.00629196	0.00779929	0.00910884	0.0106569	0.0124574	0.0144509	0.0164719	0.0177987	0.018435	0.0189494	0.0198971	0.0206189	0.0207132	0.0220129	0.0218219	0.021386	0.021047	0.0209637	0.0215429
70670613		0.00325304	0.00311891	0.00289094	0.00258978	0.00218315	0.00264022	0.00334931	0.00385147	0.00406443	0.00423624	0.00490802	0.0050193	0.00555679	0.00648031	0.00733827	0.00814546	0.00928656	0.0113023	0.0138856	0.0151379	0.0164026	0.0183159	0.0200927	0.0215881	0.0227881	0.023469	0.0234033	0.0221493	0.0207148	0.0198147
70671087		0.00279262	0.00374724	0.00462095	0.00543143	0.00617567	0.00693036	0.00726872	0.00753005	0.00951574	0.0117162	0.0138512	0.0159396	0.0181857	0.0206848	0.0217483	0.0237287	0.0244429	0.0246243	0.0236663	0.0228845	0.0227547	0.0222961	0.0227288	0.0227017	0.0211685
70671534		0.00595383	0.00562756	0.00498451	0.00428946	0.00359029	0.00293376	0.00254874	0.00225332	0.00209504	0.00224961	0.00284665	0.00364462	0.00459043	0.00568957	0.00694949	0.00999836	0.0124409	0.0159198	0.0204487	0.0239802	0.0258874	0.026455	0.0259106	0.0251841	0.0253231	0.0276073	0.0296308	0.0307516	0.0303963	0.0280401
70672385		0.00294069	0.00276128	0.00333532	0.00337677	0.00243816	0.00151091	0.000774598	0.000355339	0.00101269	0.00127107	0.0016941	0.00214306	0.00253643	0.00328382	0.00383435	0.00450763	0.00635722	0.00831246	0.0106093	0.0144508	0.0175545	0.018711	0.0176463	0.0161797	0.0159226	0.0176713	0.0202196	0.0225948	0.0243845
70672455		0.00232878	0.00218018	0.00225487	0.00179204	0.0016498	0.00228452	0.00295865	0.00350099	0.00422509	0.00799744	0.0101921	0.0117569	0.0129945	0.0144366	0.015216	0.0189834	0.0211889	0.0207379	0.0216293	0.021921	0.0229295	0.022489	0.0223896	0.0212751	0.0198204	0.0181565	0.0174138	0.0180789	0.0169282
70672832		0.00145316	0.00184078	0.00232275	0.00355777	0.00378782	0.00424129	0.0069069	0.00927369	0.00871025	0.0120189	0.0144747	0.0158957	0.015187	0.0163679	0.0167213	0.0182345	0.0203737	0.0212071	0.0212985	0.021158	0.0216614	0.0224449	0.0229245	0.022295	0.0209721	0.0194367	0.0180261
70674060		0.00137488	0.00117573	0.00129914	0.000571013	0.000599224	0.00167281	0.00309987	0.00571591	0.00780395	0.00937868	0.0107964	0.0120664	0.0146078	0.0173368	0.0196668	0.0206787	0.0192169	0.018305	0.0174167	0.0174885	0.0181333	0.019709
70674367		0.00369633	0.00468432	0.00670684	0.00811301	0.00845471	0.00774984	0.00641226	0.00496167	0.0037076	0.00259738	0.00178461	0.00217251	0.00378589	0.00270486	0.00596745	0.010169	0.0109606	0.0145111	0.0171568	0.0181675	0.0204973	0.0227842	0.0240882	0.0234517	0.0253931	0.0267495	0.0290246	0.0278594	0.03066	0.0297435
70674814		0.00269618	0.00304485	0.00309491	0.00305562	0.00319822	0.00352302	0.00363946	0.00359416	0.00356791	0.003457	0.00331265	0.00356782	0.00454513	0.00542673	0.00526578	0.00632687	0.00828779	0.0105666	0.0127975	0.0146898	0.015909	0.0172378	0.0188388	0.0214668	0.0254294	0.0277217	0.0285388	0.0282197	0.0275433
70675972		0.004305	0.00465056	0.0051031	0.00564245	0.00622401	0.00685205	0.00654786	0.00745558	0.00901244	0.0100716	0.0104615	0.0110002	0.0120204	0.0117938	0.0132609	0.0153374	0.0172443	0.018392	0.0185304	0.0194354	0.020661	0.0211719	0.0209623	0.0206814	0.0203569	0.0197389	0.0195785	0.0189626	0.0181469	0.0169722
70676656		0.00113081	0.00172177	0.00246798	0.00288121	0.00329524	0.00368982	0.0041473	0.00452012	0.00466762	0.00436013	0.00388041	0.00424217	0.00623211	0.00935116	0.0130264	0.0157477	0.0172557	0.0179107	0.0181319	0.0191572	0.0212872	0.0238808	0.0280229	0.0297051	0.0289841	0.0271968	0.0269817	0.0256262	0.025815	0.0258063
70677033		0.00561222	0.00591122	0.00603922	0.00588618	0.00551843	0.00532257	0.00616492	0.00872579	0.0127415	0.0176102	0.0227551	0.0276789	0.031175	0.0307534	0.031467	0.0311798	0.0309855	0.0306609	0.0276213	0.0261653	0.0243651	0.0203117	0.018347	0.0159984
70677103		0.00275071	0.00328503	0.00404337	0.00476534	0.00524575	0.00541095	0.00433936	0.00456202	0.005192	0.00646332	0.00847376	0.0111297	0.0141348	0.0170629	0.0197802	0.0221403	0.0243416	0.0263477	0.027585	0.0273933	0.0256914	0.0237093	0.0228224	0.0222116	0.022346
70677410		0.00444545	0.00558799	0.00609496	0.00566315	0.00479762	0.00466941	0.0047698	0.00524656	0.00680567	0.00748944	0.00961884	0.0125877	0.0154034	0.0168278	0.0182087	0.0193726	0.0216653	0.0218927	0.0223875	0.0214153	0.020653	0.0200069	0.0187326	0.0191488	0.0182072	0.0190989	0.0182615
70678638		0.00468903	0.00292467	0.00191389	0.00223723	0.00316846	0.00443702	0.00620042	0.00842605	0.0104725	0.012075	0.0137785	0.0159372	0.017956	0.0190984	0.0193321	0.019228	0.0190594	0.0183603	0.0168678	0.016661	0.0161007	0.0163075	0.0173876	0.0179341	0.0176266	0.0178247	0.0175409	0.0164346
70678945		0.00592875	0.00540961	0.00473605	0.00471928	0.00510143	0.00561791	0.00611429	0.00656917	0.00704292	0.00728051	0.00794624	0.00884114	0.0102115	0.0127283	0.0144382	0.0154412	0.016061	0.0168373	0.0175683	0.0183895	0.0186358	0.0196927	0.0203378	0.0197719	0.0188792	0.0183888	0.0183672	0.0183542	0.0171802	0.0150467
70679252		0.00279467	0.00236061	0.00202286	0.0022233	0.00170097	0.00354418	0.00436276	0.00552812	0.0073223	0.00965928	0.0120542	0.0140867	0.0155975	0.0167094	0.0178314	0.0191682	0.0203335	0.0203337	0.0209618	0.0219896	0.0241836	0.0257061	0.026882	0.026723	0.0258768	0.0230652	0.0207837	0.0176021	0.0157228	0.0146111
70680006		0.00498352	0.00592404	0.0066081	0.00688982	0.00696894	0.00617738	0.00543176	0.00519617	0.00574323	0.00745422	0.0094638	0.0109037	0.01172	0.014133	0.0157151	0.0181913	0.0205569	0.0223478	0.0250457	0.0279263	0.0291691	0.0291578	0.0281607	0.0254689	0.022484
70680857		0.0056891	0.00666784	0.00778668	0.00954268	0.0118992	0.0155069	0.0194458	0.0218818	0.0219951	0.020976	0.020325	0.0200573	0.0199432	0.0201303	0.0199713	0.0198135	0.0194453	0.0192026	0.0189938	0.0194907	0.0196536	0.0194181	0.0189099
70681094		0.00457699	0.00412009	0.00362802	0.00301963	0.00278445	0.00255095	0.00303793	0.00298427	0.00309942	0.00406522	0.00529305	0.00705426	0.00920372	0.0116721	0.0141561	0.0168077	0.0197228	0.0181616	0.021151	0.0237825	0.0256539	0.0271731	0.0261231	0.0276947	0.0267637	0.0255872	0.0245195	0.0232462
70681541		0.00385279	0.004362	0.00467365	0.00511321	0.00563605	0.00528766	0.00518862	0.00567774	0.00690645	0.00880539	0.0112441	0.0137983	0.0159668	0.0184858	0.0187863	0.0194912	0.0215	0.0226997	0.0224328	0.0224118	0.0236537	0.0248455	0.0252966	0.0244627
70682225		0.00486629	0.00546131	0.00607174	0.0075726	0.00988006	0.0127037	0.0152746	0.0168207	0.0177644	0.0179016	0.0186191	0.0192968	0.0204756	0.0219435	0.0224119	0.0228138	0.0225645	0.0210601	0.0193387	0.0179279	0.0171624	0.0157795	0.014011
70682462		0.00484941	0.00457996	0.00467043	0.0050931	0.00596233	0.00729999	0.00916309	0.0116571	0.0148231	0.0162786	0.0181632	0.0219413	0.0248385	0.02605	0.0260018	0.0257223	0.0256639	0.0252183	0.0242941	0.0233595	0.020101	0.0170294
70682532		0.00349194	0.00285123	0.00232197	0.00241578	0.00361702	0.00422084	0.00604973	0.00831332	0.00954817	0.0112702	0.0129736	0.0160746	0.0180724	0.0201816	0.0240337	0.0271976	0.0290538	0.0314905	0.0283732	0.0262062	0.0251423	0.0229696
70682839		0.00503169	0.00540597	0.00555182	0.0056988	0.00645332	0.00866816	0.0124367	0.0170275	0.020364	0.0224654	0.0230686	0.023309	0.0235572	0.0228319	0.0223278	0.0223403	0.0229854	0.0243128	0.0248755	0.0248006	0.0242837	0.0229275
70683076		0.00448706	0.00485733	0.00578991	0.00639348	0.00663439	0.00839951	0.00776055	0.00971009	0.0114476	0.0130129	0.0151597	0.0164074	0.0153413	0.0174281	0.0189432	0.0212017	0.0257949	0.0281555	0.0272132	0.0246535	0.0238891	0.0256074	0.0274801	0.0290076	0.0297495	0.0281203
70683383		0.00230458	0.00223753	0.00265282	0.00314906	0.00378276	0.00447272	0.00544307	0.00672561	0.00859263	0.0101954	0.0112375	0.0126302	0.0126719	0.0137585	0.0157352	0.0173127	0.0196967	0.0218788	0.024974	0.0258975	0.0271606	0.0265798	0.0252526	0.0252764	0.0243972	0.0233657	0.0233635	0.0209629	0.0189758
70683523		0.00296264	0.00308483	0.0031599	0.00395669	0.00491877	0.00559362	0.00509894	0.00551634	0.00588071	0.0064769	0.00740996	0.00894284	0.0103924	0.0118611	0.0135817	0.016	0.0150086	0.0183697	0.0214246	0.0249776	0.0279953	0.0295179	0.0299996	0.0301729	0.0317059	0.0307105	0.0298186	0.0254686	0.0218507
70683690		0.00289147	0.00292428	0.00326217	0.00352398	0.00376828	0.00370058	0.004552	0.00605702	0.00516028	0.00671201	0.0089531	0.0115355	0.0129674	0.0142413	0.0158906	0.0157803	0.0140368	0.0149801	0.0136736	0.0144612	0.0159807	0.0190258	0.019462	0.0220049	0.0259184	0.0303003	0.0317056
70683830		0.00249391	0.00350791	0.00394051	0.00453124	0.00503616	0.0050705	0.00491753	0.00529845	0.00517482	0.00589966	0.00709574	0.00899899	0.0113439	0.0139438	0.0165733	0.0188444	0.0208104	0.0201696	0.0212072	0.025242	0.0280832	0.0290133	0.0290045	0.0267206	0.0260973	0.0269866	0.0293266	0.0277194	0.0270385
70684067		0.00759401	0.00647991	0.00566776	0.00504718	0.00496321	0.00466058	0.004536	0.00424444	0.00401033	0.00402138	0.0050887	0.00609904	0.00723035	0.00828711	0.00901526	0.00877112	0.00879431	0.00932726	0.0107809	0.0147057	0.0147221	0.0163603	0.019647	0.0207533	0.022788	0.024572	0.0249989	0.0281639	0.0316275	0.0317562
70684681		0.00639225	0.00720857	0.00818726	0.00956727	0.0102871	0.00921697	0.00759067	0.00643727	0.00665359	0.00852455	0.0115336	0.0145406	0.0185797	0.0226417	0.0262339	0.0284172	0.0284803	0.02902	0.0294219	0.0284374	0.0271565	0.0258214	0.0252917	0.0237937	0.0204245	0.0175576	0.0156712
70685295		0.00212285	0.00272543	0.00328173	0.003689	0.00395529	0.00399582	0.00340138	0.00313489	0.00349497	0.00432893	0.00536292	0.00712807	0.00993051	0.0133049	0.0165907	0.0195333	0.0224707	0.0254481	0.0276704	0.0282615	0.0269579	0.0245143	0.0243928	0.0235967	0.0250361	0.0265371	0.0274998
70685435		0.00336486	0.00372433	0.00323811	0.00365084	0.00305355	0.00375985	0.00481776	0.00603027	0.00867197	0.0109294	0.0143367	0.0178281	0.0205047	0.021245	0.0189208	0.0188799	0.0173787	0.0176211	0.0181303	0.0195676	0.0222727	0.0239988	0.0231988	0.0216787	0.0196352	0.0175491	0.0158174	0.0134715	0.0120303
70685505		0.00209452	0.00222455	0.00284546	0.00377862	0.00477176	0.00575479	0.0067743	0.00777627	0.00822956	0.00958136	0.0112929	0.0126606	0.0149579	0.0193699	0.0228022	0.0259338	0.026852	0.0260605	0.0238166	0.0216883	0.0207935	0.0205207	0.0210939	0.0225401	0.0230439	0.0234233	0.0222248	0.0193384
70686049		0.00369516	0.00303115	0.00235375	0.00214581	0.00215221	0.00188157	0.00161874	0.0015317	0.00136529	0.00180492	0.00151162	0.00113794	0.00168904	0.00320985	0.00586719	0.00927786	0.00837331	0.0118665	0.0102105	0.012168	0.0125039	0.0153693	0.0173848	0.018305	0.0252825	0.0299574	0.0302978	0.0294746	0.0290972	0.0303555
70686119		0.00155354	0.000720544	0.000552213	0.00119805	0.0020513	0.00290242	0.00397572	0.00563942	0.00856327	0.00936168	0.00970657	0.0128144	0.0156409	0.0185951	0.0197029	0.019976	0.0193903	0.0191054	0.0188321	0.0188445	0.0180901	0.0168298	0.0163064	0.0158385
70686733		0.00356958	0.0045185	0.00532154	0.00564617	0.00615615	0.00657874	0.00696538	0.00758347	0.0078729	0.00704125	0.00534762	0.00450057	0.00374822	0.0040511	0.00739086	0.0122865	0.0172395	0.0215585	0.0250453	0.0274618	0.0287754	0.0293066	0.029293	0.0284116	0.0274818	0.0274521	0.0262903	0.0259269
70687040		0.00270111	0.00260435	0.00280212	0.003513	0.00439936	0.00516692	0.0060527	0.00732219	0.00849381	0.00984107	0.0114158	0.0137973	0.0164202	0.0193266	0.0219425	0.0238672	0.0247686	0.0248776	0.0244028	0.0243176	0.0247692	0.0261832	0.0270301	0.0283512
70687277		0.0067177	0.00720496	0.00760926	0.00859307	0.00993081	0.01187	0.0139655	0.0163819	0.0187946	0.0211045	0.0233541	0.0244409	0.0245688	0.0242379	0.023765	0.0231299	0.0231562	0.0240124	0.023869	0.0228856	0.0213393	0.0191672	0.0173061
70688268		0.0035765	0.00321503	0.00306735	0.00353834	0.00360691	0.00372543	0.00362538	0.00291621	0.0035509	0.00701049	0.00974152	0.0141407	0.0185683	0.0198785	0.0212893	0.0205972	0.0204394	0.0212043	0.0234487	0.0248511	0.025268
70688575		0.00348955	0.00222508	0.00244947	0.00260279	0.00262701	0.00270549	0.00448794	0.00583311	0.00754086	0.00996308	0.0134161	0.017233	0.020811	0.0234455	0.0240877	0.0232689	0.0226946	0.0210603	0.0197014	0.0183571	0.0177891	0.0170451	0.0174616	0.0187441	0.0173521	0.0148059	0.0129396	0.0123699	0.0111342	0.00979018
70688715		0.00353719	0.00208147	0.000880216	0.000838339	0.00125914	0.00228322	0.00415901	0.00700969	0.0104256	0.0127361	0.0147241	0.0172592	0.0190197	0.0207873	0.0220139	0.0248493	0.0266102	0.0260946	0.024648	0.0239064	0.0241807	0.0235088
70689022		0.00288492	0.00226699	0.00139182	0.000987294	0.0020867	0.00188899	0.00191493	0.00208032	0.00276248	0.00452737	0.0044714	0.00640454	0.00671651	0.008446	0.00876323	0.0118099	0.0147259	0.0168815	0.0165888	0.0168825	0.0168035	0.0171538	0.0190077	0.0201877	0.0229648	0.0245965	0.0259149	0.0257387	0.0233357	0.0185748
70689496		0.00266954	0.00238747	0.00255349	0.00235583	0.00257237	0.00296829	0.00376004	0.00532706	0.00761229	0.00968694	0.0123896	0.0166329	0.0192279	0.0200826	0.0206229	0.021257	0.0210747	0.0210154	0.0210649	0.0224921	0.0249488	0.0261988	0.0251665	0.0225869	0.0199755	0.0172433	0.0143899
70690250		0.00255883	0.00264266	0.00287129	0.00320919	0.00378776	0.00437796	0.00448063	0.00485522	0.00461137	0.00456566	0.00474193	0.00542375	0.00685594	0.00811041	0.00899779	0.00963994	0.0106229	0.0137339	0.0149994	0.0158057	0.0171135	0.0187765	0.0200785	0.021226	0.0224761	0.0229563	0.0227014	0.0220959	0.021353	0.0210291
70690320		0.00280496	0.00138296	0.00143888	0.00285021	0.00295192	0.00708263	0.00578806	0.00775309	0.00949229	0.0112398	0.0132194	0.0144999	0.0180456	0.0208158	0.0229296	0.0254032	0.0261066	0.0257131	0.0242642	0.0229683	0.0228384	0.021774	0.0205762	0.0196918	0.0192224	0.0183396	0.0166537	0.0150101
70690487		0.00260146	0.00126513	0.0024323	0.00225439	0.00373879	0.00689713	0.0109423	0.0151094	0.0183306	0.0204748	0.0203929	0.0214402	0.0233878	0.0255217	0.0266743	0.0267838	0.0272997	0.0257009	0.023683	0.0233449	0.0208125	0.0192521	0.0185616	0.0154443	0.0124956
70691241		0.00381943	0.00474039	0.00592165	0.00657063	0.00687823	0.00905758	0.0113616	0.0139897	0.0162293	0.0181091	0.0195134	0.0194774	0.020291	0.0212859	0.0227076	0.0227093	0.0228012	0.0230589	0.0231615	0.0229831	0.0222643	0.0206096	0.0184717	0.0157023
70692302		0.00768655	0.00963299	0.011528	0.0125516	0.0138527	0.0146439	0.0157142	0.0176717	0.0191301	0.0197567	0.0191234	0.0184159	0.0175103	0.0175936	0.018908	0.0189966	0.0184086	0.0162681	0.0144242	0.0124326	0.0103879	0.00901504	0.0084041	0.00745185
70692469		0.00666891	0.00624111	0.0055763	0.0048966	0.00430652	0.00356708	0.00365947	0.00388888	0.00411025	0.00433385	0.00451	0.00409259	0.00464981	0.00426663	0.00327105	0.00367022	0.00287812	0.00271363	0.00437673	0.00628496	0.00920742	0.0131315	0.015712	0.0201812	0.0225728	0.0252804	0.0294355	0.0303131	0.0279718	0.0248853
70692609		0.00218305	0.00255739	0.00271229	0.00272906	0.00297418	0.00362899	0.00468866	0.00670556	0.0100477	0.0172768	0.0192014	0.019639	0.01926	0.019707	0.0210216	0.0217085	0.0210152	0.0192471	0.0173499	0.0173658	0.0180194	0.0175509	0.0173982	0.0158471
70693083		0.00384752	0.00350196	0.0041345	0.00377991	0.00436927	0.00516355	0.00561342	0.00563204	0.00513207	0.00458094	0.00572938	0.0070775	0.0123736	0.0139072	0.0188392	0.0238849	0.0283773	0.03147	0.0326248	0.0321525	0.0309722	0.0291562	0.0269837	0.0253242	0.0266526	0.0255569
70693530		0.00297693	0.00307219	0.00324177	0.00354583	0.00423479	0.00555194	0.00655318	0.00842997	0.0102815	0.0135695	0.016336	0.0170834	0.0168163	0.0165804	0.0178539	0.0201975	0.0225188	0.0241331	0.0246462	0.0238735	0.0226747	0.0218646	0.0213797	0.0203063	0.0175668	0.0157736
70693837		0.00378562	0.00345634	0.00363657	0.00405829	0.00461587	0.00517641	0.00508953	0.00496779	0.00602051	0.00862199	0.0119911	0.015669	0.0195388	0.0236103	0.0275908	0.0307086	0.0320088	0.0315579	0.0303336	0.029702	0.0295563	0.0296899	0.029643	0.0287073	0.0272133	0.0242048	0.0211699
70694074		0.00428329	0.00461894	0.00391464	0.00423746	0.00440862	0.00438041	0.00441849	0.00471893	0.00493897	0.00494748	0.00477041	0.0039359	0.00325198	0.00262651	0.00243824	0.00304718	0.00460706	0.00742184	0.0113636	0.0148279	0.0189903	0.022887	0.0255806	0.0271163	0.0289452	0.0319539	0.0334426	0.0334058	0.0309746	0.02974
70694381		0.00514603	0.00592122	0.00610919	0.00581467	0.00523474	0.00477036	0.00513343	0.00661856	0.00911369	0.0119182	0.0146738	0.017009	0.0184672	0.0188007	0.01941	0.0188243	0.0182957	0.0183805	0.0187574	0.018785	0.0188563	0.0181944	0.0197881	0.0233576	0.0249532	0.0230627	0.0216366	0.0186162
70695065		0.00273226	0.00274802	0.0027772	0.00316057	0.00354756	0.0040777	0.00501482	0.00585977	0.00557261	0.00682505	0.00839057	0.00904198	0.00981356	0.0119058	0.0143491	0.0170192	0.0215713	0.0210557	0.0232358	0.0238204	0.0231785	0.0222172	0.021367
70695986		0.00199629	0.00151467	0.00145099	0.00157581	0.00210765	0.00233676	0.00287487	0.00361571	0.00453319	0.00584755	0.010037	0.0131794	0.0168475	0.0189038	0.0196731	0.0211379	0.0212244	0.0218283	0.0197858	0.0168077	0.0150653	0.0142359	0.0149241	0.0182075	0.0202036	0.019875	0.0194961	0.019517	0.0208572	0.0224233
70696433		0.00428537	0.00487163	0.00602944	0.00799897	0.00989673	0.0111515	0.0122905	0.0138173	0.0144695	0.0141283	0.0123268	0.0131026	0.0157781	0.0165726	0.0184312	0.0205364	0.0230015	0.0258569	0.0272499	0.0281532	0.0278465	0.0264101	0.02488	0.0223217	0.0196504	0.0164737
70696977		0.00254626	0.00304622	0.00351184	0.00381978	0.00393382	0.00378818	0.00336338	0.0033057	0.00407921	0.00597617	0.00850495	0.010284	0.0119598	0.0160717	0.0198883	0.0231355	0.0257571	0.0266248	0.0271679	0.0291855	0.0289911	0.0284627	0.0272389	0.0266067	0.026611	0.0262364	0.02535	0.0234286
70697661		0.00273714	0.0046584	0.00468512	0.00677094	0.00897662	0.00941575	0.0110895	0.012351	0.0123391	0.0132476	0.0145298	0.0156359	0.0164947	0.0172939	0.018615	0.0179705	0.0188208	0.0216906	0.0230833	0.0217562	0.0203908	0.0189144	0.0176567	0.0181077	0.0177265	0.0174434	0.0171371	0.01649
70697968		0.00402414	0.00469849	0.00542379	0.00518053	0.00575582	0.00637927	0.00746035	0.00853773	0.00980749	0.0115438	0.0106156	0.0126454	0.0143806	0.0149807	0.0159997	0.0169592	0.0184031	0.0218324	0.0238565	0.0244746	0.0236412	0.020625	0.0180278	0.0168052	0.0164081	0.016678	0.0170181
70698345		0.00550324	0.00526469	0.00423676	0.00410443	0.00473166	0.00565422	0.00669613	0.00620355	0.00734409	0.00853951	0.00860397	0.00759799	0.00911994	0.0109489	0.0136959	0.0161319	0.0169993	0.0177594	0.0169846	0.0182736	0.0186962	0.0195766	0.0218534	0.0233367	0.0226598	0.0213964	0.0193551	0.0201944	0.0218976	0.0238545
70698652		0.00116793	0.000647572	0.000685057	0.000991191	0.00132007	0.0020671	0.00281072	0.00341299	0.00376625	0.00390129	0.00431556	0.00607621	0.00938987	0.0134037	0.017289	0.0199635	0.0227493	0.0244283	0.0236166	0.0248439	0.0259888	0.0250353	0.0256718	0.0244158	0.0234357	0.0239371	0.0248603	0.0257943	0.0249937
70699880		0.00347603	0.00360088	0.00365987	0.00376775	0.00400499	0.00432822	0.00354125	0.00347914	0.00341459	0.00319225	0.00284465	0.00274109	0.00339863	0.00391673	0.00487774	0.00669648	0.00900596	0.0114476	0.0135855	0.0154584	0.0165212	0.0183508	0.0208817	0.0240138	0.0265871	0.0273208	0.0266784	0.0252381
70700187		0.0022516	0.00217352	0.00205473	0.00233246	0.00207415	0.00234959	0.0025241	0.00261819	0.0028121	0.00294551	0.00319481	0.00340302	0.00355123	0.00338569	0.00333971	0.00357823	0.00392706	0.00434762	0.00560058	0.00672987	0.00816904	0.0100481	0.0123257	0.0150077	0.0180328	0.020992	0.0227674	0.0250557	0.0264767	0.0273906
70700327		0.00100865	0.000634599	0.00107022	0.00149685	0.00255579	0.00340973	0.00423423	0.00475854	0.00515971	0.00540025	0.00611014	0.00714252	0.00912011	0.0119932	0.0149082	0.0176478	0.0198902	0.0215339	0.0213608	0.02229	0.0219909	0.0214231	0.020929	0.0197184	0.0197454	0.0204084
70700634		0.00151421	0.00280741	0.00414447	0.00547335	0.00680063	0.00757524	0.00806306	0.00861769	0.00883725	0.00915241	0.00910838	0.00969938	0.0109015	0.0130291	0.0163894	0.0200769	0.0205609	0.0229411	0.025656	0.0248149	0.0238441	0.0211062	0.0183354	0.0151462	0.0142239
70701011		0.00569003	0.0059321	0.00657547	0.00659792	0.00660244	0.00679292	0.00646138	0.00609165	0.00558406	0.00530359	0.00642357	0.00933237	0.0128465	0.0160807	0.0185732	0.0201921	0.0213224	0.0224432	0.0239112	0.0247539	0.0254482	0.0258937	0.0246498	0.0228951	0.0217924	0.0221349	0.0205973
70701555		0.00816976	0.00866348	0.00938586	0.010374	0.0106345	0.0117825	0.012667	0.0133792	0.0145252	0.0159928	0.0175842	0.0179968	0.0169225	0.0190535	0.0221666	0.0246653	0.025931	0.0258767	0.0253609	0.0246337	0.0224843	0.0230607	0.0227392	0.0234159	0.022179	0.0197803
70702783		0.00421701	0.00433362	0.00446875	0.00427524	0.0045981	0.00415161	0.00377991	0.00347861	0.00325405	0.00330943	0.00333761	0.00335732	0.00449818	0.00699286	0.00936177	0.0114986	0.0136254	0.0157016	0.0176068	0.0197184	0.0210124	0.0224627	0.0241122	0.0242552	0.0235465	0.0226079	0.0223695	0.0214964	0.0207387	0.0207254
70702853		0.00125265	0.00103989	0.000957963	0.0016662	0.00178977	0.00223599	0.00436873	0.00324909	0.00529057	0.00658966	0.00763347	0.0106619	0.0100048	0.0136755	0.014884	0.0178139	0.021943	0.0257299	0.0274323	0.0269838	0.0263034	0.0264128	0.029468	0.0299993	0.0304677	0.0281256	0.0249474	0.0211487
70702923		0.00436908	0.00553525	0.00633682	0.00744032	0.00976632	0.0133836	0.0174435	0.0212137	0.0237785	0.0249356	0.0262599	0.0252778	0.0236241	0.0217232	0.0202669	0.0186159	0.0175031	0.0169656	0.0166825	0.0167159	0.0163088	0.0155095	0.0144124
70703090		0.00250112	0.0039632	0.00496505	0.00578634	0.00710945	0.0089416	0.0111069	0.0132897	0.0152619	0.0168402	0.0178943	0.0184964	0.0186291	0.0186438	0.0190535	0.0201675	0.0213045	0.022086	0.0226576	0.0230046	0.0228412
70704458		0.00243025	0.00270971	0.00291539	0.00349211	0.00393665	0.004482	0.00620492	0.00801962	0.00991607	0.0114002	0.0128801	0.0145265	0.0158149	0.0168165	0.0174862	0.017684	0.0186559	0.0180185	0.0184278	0.0186014	0.018219	0.0183936	0.0176895	0.0167014	0.0151719
70704765		0.00114836	0.00151258	0.00188492	0.00236017	0.0029896	0.00394267	0.00532331	0.00674433	0.00808706	0.00848637	0.00906812	0.00960979	0.010507	0.0129641	0.0153546	0.0147425	0.016003	0.0167112	0.0177605	0.0189418	0.0193785	0.0198327	0.0202911	0.0218418	0.0219995	0.0208375	0.0207787	0.0206027	0.0206667
70704905		0.00504682	0.00564054	0.00335617	0.00339909	0.00281242	0.00378839	0.00652116	0.0107178	0.0148935	0.0183767	0.020632	0.0217665	0.0226713	0.0232885	0.0249525	0.0276377	0.0291658	0.0291676	0.028725	0.0266091	0.024884	0.0238763	0.0223029	0.0217106
70705142		0.000945911	0.000700362	0.0011076	0.00153075	0.00212563	0.00283625	0.00386214	0.00505142	0.00648922	0.00837656	0.0101912	0.0112504	0.0127872	0.0130221	0.0164206	0.015575	0.0175369	0.0186318	0.0198296	0.0208986	0.0204742	0.0196641	0.0179178	0.0169881	0.0159199	0.0157293	0.0160401	0.0166766	0.0175713
70705519		0.00237946	0.00278238	0.00315138	0.00334841	0.00335657	0.00332101	0.00359856	0.00399199	0.00477374	0.00594575	0.00698055	0.00884411	0.0126308	0.0161976	0.0186655	0.0199256	0.0204837	0.0206971	0.0206409	0.0199845	0.0198182	0.0185714	0.0179161	0.0177463	0.018093	0.0186846	0.0183452	0.0179186	0.0173008	0.0160752
70705756		0.00572568	0.00367969	0.00197971	0.00134529	0.00188506	0.00199432	0.00173068	0.00203443	0.00286263	0.0038398	0.00460591	0.00522372	0.00726014	0.00815656	0.00885898	0.009786	0.0109291	0.0103975	0.00969144	0.00991328	0.0109342	0.0119439	0.0127214	0.0134777	0.0150662	0.0171901	0.0199647	0.0229413	0.0261191
70706370		0.00504222	0.00472329	0.00388444	0.0029359	0.00212917	0.00290519	0.00184702	0.00530413	0.00843773	0.0118168	0.0147742	0.0169093	0.0184205	0.0193167	0.0206243	0.0235424	0.0259045	0.0273183	0.0278506	0.0279037	0.0273644	0.026764	0.0265025	0.0250355	0.0239098	0.0233789
70707291		0.00402287	0.00493002	0.00546781	0.00577863	0.00598727	0.00590975	0.00582242	0.0066248	0.00818432	0.00955072	0.0109984	0.0126306	0.0145063	0.0166756	0.0174737	0.0176694	0.0177595	0.0177049	0.0185978	0.0180713	0.019518	0.0221098	0.0239194	0.0244641	0.0235769	0.0214728
70707361		0.00403442	0.00466718	0.00532175	0.00583359	0.00561513	0.00458054	0.00294324	0.00212909	0.00435255	0.00860178	0.0117204	0.0151306	0.0184571	0.021633	0.0244418	0.0261766	0.0259759	0.0241452	0.0214783	0.0197777	0.0193369	0.0190733	0.0178087
70707501		0.00169131	0.00153704	0.00221977	0.00291181	0.00367844	0.00443549	0.00527922	0.00625962	0.00950855	0.0112138	0.0130711	0.0149371	0.0167486	0.0186187	0.0199914	0.0207422	0.0201685	0.0198501	0.020045	0.0209767	0.0221395	0.0221041	0.0213828	0.0208856
70708966		0.000991449	0.0013639	0.00188433	0.002477	0.00321554	0.00387566	0.00528992	0.00689022	0.00909653	0.0121199	0.0154348	0.0182417	0.0197234	0.0188833	0.0190803	0.019974	0.0203954	0.0224131	0.0251731	0.0268431	0.0305045	0.0313048	0.0327302	0.0319884	0.0292708
70709273		0.00417309	0.00343441	0.00223432	0.00166268	0.00185092	0.00271971	0.00463935	0.00678856	0.00965192	0.0114258	0.0125671	0.0154389	0.0184999	0.0207577	0.0235662	0.0248275	0.0267638	0.0275443	0.0266047	0.0256749	0.0237273	0.0215844	0.0205335
70709343		0.00336142	0.0031478	0.00288665	0.00253308	0.00245208	0.00215334	0.00275931	0.00392943	0.00551863	0.00886493	0.0127519	0.0159571	0.0173949	0.0171735	0.0176492	0.0179719	0.0197303	0.0209749	0.021941	0.0218476	0.0220274	0.0218415	0.0220297	0.0217808	0.0214527	0.0199349
70709413		0.00227463	0.00220104	0.00213596	0.0019836	0.00202514	0.0022333	0.00204324	0.00209025	0.00186383	0.00134741	0.000261627	0.00268514	0.00650092	0.0105774	0.014103	0.0166375	0.0156884	0.0168463	0.0174497	0.0181641	0.0193755	0.0208171	0.0217741	0.0214924	0.0196086	0.0201101	0.0184533
70709887		0.00223762	0.0014272	0.00119974	0.00125082	0.00126266	0.00147923	0.00198573	0.00268651	0.00289732	0.0029758	0.00303619	0.00324467	0.00371005	0.00486836	0.00653367	0.00739684	0.00919567	0.0112655	0.0134521	0.0155131	0.0173029	0.0193225	0.0220098	0.0239477	0.02672	0.0297353	0.0292743	0.027779	0.0249489	0.0237878
70709957		0.00392145	0.0038293	0.00359044	0.00379212	0.00319121	0.00252341	0.00231195	0.00179512	0.00204462	0.00159821	0.00178001	0.00159198	0.00144737	0.00104037	0.000444327	0.00135886	0.00259685	0.00361906	0.00452311	0.00716354	0.00941724	0.0110976	0.0121174	0.0136296	0.0144402	0.0151226	0.0162811	0.0168435	0.0185666	0.0178478
70710404		0.00399034	0.00332174	0.00275899	0.0026706	0.00310821	0.0039967	0.00460576	0.00568975	0.00661918	0.0072326	0.00840887	0.00928077	0.0092564	0.0104889	0.012037	0.0134621	0.0155766	0.0174499	0.0193602	0.0207664	0.0217918	0.0223557	0.0228964	0.0228192	0.021043	0.0193013	0.0181995	0.0168217	0.0160687
70710948		0.00218793	0.00175147	0.00109646	0.000541341	0.00227996	0.00413757	0.00616449	0.00826078	0.00789408	0.0096556	0.011146	0.0125895	0.0152427	0.0181582	0.0218221	0.0239905	0.0239089	0.02529	0.0247486	0.0230801	0.0238294	0.0242645	0.0238722	0.0231064	0.0232541	0.0233643	0.0235852
70711632		0.00522818	0.00600126	0.00626135	0.00633577	0.00485686	0.00466213	0.00495588	0.00568082	0.00674599	0.00851276	0.0106788	0.0133642	0.0163131	0.0189402	0.0209072	0.022197	0.022106	0.0226609	0.0222528	0.022964	0.0234752	0.023825	0.0225508
70711869		0.00340242	0.00265745	0.00231587	0.00221352	0.00199762	0.00187443	0.00171808	0.00183971	0.00248974	0.00336629	0.00426958	0.00485859	0.00504601	0.00376862	0.00392454	0.00384247	0.00484199	0.00630518	0.00817395	0.0103392	0.0127485	0.0157316	0.0183086	0.020705	0.022015	0.0216013	0.0206385	0.0194154	0.0179992	0.0175918
70711939		0.00463653	0.00504059	0.00538524	0.00602802	0.00695095	0.00868171	0.0114874	0.0144428	0.017677	0.0198998	0.0203685	0.019919	0.019552	0.0194863	0.0191252	0.0186616	0.0183389	0.0176726	0.0181028	0.0181658	0.0175913	0.0164327	0.0155656	0.0145331
70712246		0.00295869	0.00265695	0.00235483	0.00246897	0.00268712	0.00302687	0.00386079	0.00402027	0.00559306	0.00636088	0.00914374	0.0126271	0.0151804	0.0163187	0.0164106	0.0157241	0.0165302	0.0157553	0.0167856	0.0192178	0.0227292	0.0254074	0.0271703	0.0272934	0.0267429	0.0255212
70712790		0.00669851	0.00601505	0.00519533	0.00428068	0.00428263	0.0062458	0.00899183	0.0122696	0.0158351	0.0187488	0.0204714	0.0215071	0.0214678	0.0212941	0.021424	0.0219467	0.021889	0.0221961	0.0222146	0.0217628	0.0218972	0.0218268	0.0204711	0.0185375	0.0164521	0.0148352
70714535		0.00260093	0.00326667	0.00377952	0.00411973	0.0042848	0.00434999	0.00460229	0.00479152	0.00409712	0.00497068	0.00602971	0.00794608	0.00804669	0.0101569	0.0127732	0.0129484	0.0162489	0.0185487	0.0196055	0.0200065	0.0202823	0.0205397	0.0210927	0.0217099	0.0217011	0.0224306	0.0231974	0.0243662	0.0247938
70714605		0.00651032	0.0058317	0.00505033	0.00411301	0.00283908	0.00203266	0.00277463	0.00437526	0.00592849	0.00753239	0.0105439	0.0141245	0.0179316	0.0213888	0.0236601	0.0237693	0.0240784	0.0248185	0.0249283	0.0258937	0.0260117	0.0250723	0.0230948	0.022729	0.0213671	0.0204807
70715526		0.00127764	0.00203225	0.00197477	0.00181456	0.00209826	0.00288807	0.00409951	0.00535751	0.00552165	0.00687052	0.00846537	0.0107856	0.0128221	0.0145246	0.0158827	0.0185083	0.0210299	0.0231023	0.0247851	0.026595	0.0287201	0.0297362
70715693		0.00274066	0.00253173	0.00243397	0.00202839	0.00283478	0.00368382	0.0050418	0.00803568	0.00911403	0.0118341	0.013392	0.0166661	0.0202404	0.019055	0.0175544	0.0171663	0.0194918	0.0211724	0.0228404	0.0252343	0.0246512	0.0236136	0.0219097	0.0212921	0.0188346	0.0162717	0.0148219
70715833		0.0040655	0.00346953	0.00292838	0.00257496	0.00273984	0.00219399	0.00182661	0.00178489	0.00183803	0.0019263	0.00217307	0.0030334	0.00424055	0.00675943	0.00572724	0.00708802	0.00854666	0.0105719	0.0127365	0.0149581	0.0173382	0.0195497	0.0209961	0.0216873	0.0217049	0.0209197	0.0201561	0.0203662	0.0210737	0.0217369
70716517		0.000668585	0.000817227	0.00119647	0.00174516	0.0024388	0.00259224	0.00278939	0.00336002	0.00419816	0.00549044	0.00722712	0.00931984	0.0115114	0.0141797	0.0168665	0.0189089	0.0198971	0.0201751	0.0208477	0.0220851	0.0243661	0.0263776	0.0255961	0.0248408	0.0220381	0.0201689	0.0195943	0.0197179	0.020047
70716754		0.00275127	0.00248321	0.00204175	0.00143201	0.000945602	0.00123011	0.00185376	0.0019889	0.00239504	0.00272888	0.00327317	0.00408678	0.00498766	0.00684213	0.00685492	0.0071066	0.00936943	0.0114616	0.0128768	0.0157894	0.018084	0.0170709	0.0183271	0.0199177	0.0221057	0.0230469	0.0249017	0.0250686	0.0248054	0.0239394
70717201		0.00281279	0.0031973	0.00278236	0.00292825	0.00278905	0.00275879	0.00310056	0.00297599	0.00331258	0.00409053	0.00543736	0.0069632	0.00852694	0.0104074	0.0129463	0.0158686	0.0191286	0.0218047	0.0235608	0.0235465	0.0243716	0.0231808	0.0234603	0.0232095	0.0232379	0.0239182	0.0235259	0.0220102	0.0209352
70717508		0.00402553	0.00449955	0.00475604	0.00540675	0.00576437	0.00589191	0.00640401	0.00594679	0.00560036	0.00546137	0.00540484	0.00564467	0.00535147	0.00432448	0.0028393	0.00222873	0.00467337	0.0079173	0.0106258	0.0137253	0.0153881	0.0158382	0.0159464	0.0167918	0.0175259	0.0179657	0.0192825	0.0208763	0.0221039	0.0226316
70717982		0.00303789	0.00374343	0.00428006	0.00457804	0.00414138	0.00358158	0.00302051	0.00302943	0.00239257	0.00212489	0.00183441	0.00245314	0.00345412	0.00436329	0.00536757	0.00596085	0.00779405	0.00904272	0.0132619	0.0154328	0.0165591	0.0184409	0.021084	0.0221233	0.0223383	0.0224716	0.0223025	0.0224137	0.0209014	0.0197782
70719043		0.00239845	0.00231907	0.00250476	0.00290462	0.00395497	0.00440947	0.00482455	0.00515692	0.00539091	0.00580416	0.00690569	0.0107455	0.0123792	0.0133866	0.0138316	0.0144781	0.015304	0.0171771	0.021886	0.0267007	0.0266725	0.0268886	0.0267139	0.0250106	0.0241027	0.0224099	0.0215748	0.0212859	0.0212131	0.0201584
70719727		0.00277745	0.0034754	0.00400643	0.00432251	0.00450411	0.00467462	0.00465233	0.00440944	0.00457881	0.00474928	0.00476351	0.00457594	0.00458079	0.00537598	0.00700919	0.00906271	0.0112401	0.0150057	0.017455	0.0204142	0.0228189	0.0248467	0.0254847	0.0252203	0.0251635	0.024766
70720104		0.00257207	0.00340735	0.00270903	0.00409923	0.00409353	0.00466833	0.00516919	0.00596289	0.00519172	0.00669643	0.00746482	0.00871655	0.0105025	0.0105177	0.0114828	0.0134293	0.016065	0.0174388	0.0187995	0.0208538	0.0221049	0.0202127	0.0191209	0.0169607	0.0178096	0.0177106	0.0192771	0.0205624	0.0211	0.0194783
70720341		0.00372546	0.00415124	0.00375216	0.00242362	0.00199489	0.00205374	0.00165286	0.00271415	0.00552584	0.00828606	0.0105878	0.0118062	0.012628	0.0133562	0.016231	0.0201119	0.0239848	0.025923	0.0265613	0.0256653	0.0246332	0.0243323	0.0243592	0.0246289	0.0232202	0.021214	0.0178513	0.0175362	0.0141795	0.0122386
70720411		0.00251031	0.0019723	0.00159708	0.00126476	0.00107499	0.0016079	0.00297858	0.00475887	0.0048795	0.00516944	0.0056641	0.00809947	0.0100291	0.0109953	0.0111249	0.0112717	0.013157	0.0149607	0.0157298	0.016129	0.0165401	0.0165256	0.0179295	0.0193228	0.0196144	0.0209034	0.0221899	0.0229211	0.0230499
70721262		0.00245092	0.00198684	0.00260967	0.00313555	0.00355505	0.00392397	0.00350152	0.00359137	0.00334853	0.00309052	0.00302446	0.0031225	0.00383194	0.00465953	0.00563387	0.00676939	0.00789171	0.00917537	0.011444	0.0131473	0.0161534	0.0198251	0.0235291	0.0265454	0.0270923	0.026004	0.0236014	0.0232656	0.0250073	0.0250395
70721639		0.00645748	0.00689589	0.0064648	0.00531842	0.00418657	0.0032408	0.00282655	0.00420428	0.00708517	0.0106162	0.0165198	0.022131	0.0245249	0.0254344	0.0244115	0.0246843	0.0249704	0.0260037	0.0278251	0.0262919	0.0245	0.0214315	0.0184863	0.0174096	0.0156826
70721709		0.00382311	0.0031159	0.00270548	0.00216809	0.00194136	0.00220958	0.00327209	0.00526289	0.00822624	0.0120561	0.0165477	0.0187621	0.0210269	0.0223667	0.0215194	0.0227849	0.0229588	0.0233453	0.0221206	0.0217233	0.0219157	0.0216451	0.0215471	0.0204803	0.0186997
70721946		0.00200817	0.00126888	0.00138338	0.00226484	0.00324174	0.00406532	0.00500865	0.00431231	0.00454787	0.00531844	0.00720724	0.0095106	0.0119999	0.013962	0.0148405	0.0149669	0.0146924	0.0154445	0.0156509	0.015771	0.0163366	0.0163261	0.0146364	0.0132259	0.0141134	0.0170133	0.0175154	0.0179419	0.0179231
70722253		0.00260028	0.00141409	0.00108199	0.00198988	0.0041829	0.00652974	0.00900146	0.0116299	0.0152118	0.0192941	0.0230767	0.0259297	0.0287418	0.0276229	0.0245042	0.0231162	0.0232591	0.0226845	0.0226737	0.0212512	0.0207005	0.018817	0.017682	0.017169	0.016492
70722490		0.00539602	0.0055774	0.00550033	0.00525392	0.00473485	0.00486824	0.00507949	0.0051175	0.00483704	0.00494335	0.0056947	0.00642989	0.00693414	0.00625264	0.00772884	0.00998826	0.0128371	0.0162026	0.0191933	0.0220411	0.02163	0.021434	0.0206704	0.0201871	0.0192296	0.0175957	0.0159577	0.0150589	0.0139893	0.0140735
70722630		0.00501324	0.00442695	0.00393966	0.00433456	0.00440856	0.00463214	0.00500511	0.0051599	0.005265	0.00477917	0.00478278	0.00630979	0.0085948	0.0114191	0.0144034	0.0172677	0.0198132	0.0215775	0.0227935	0.023433	0.0233453	0.0225464	0.022133	0.0222146	0.0222269	0.0215361	0.021031	0.0205218	0.019795	0.0186191
70723007		0.00255178	0.00228939	0.00135859	0.000935068	0.000940433	0.00170376	0.00274014	0.00421273	0.00613844	0.00839902	0.0113664	0.0142453	0.0169499	0.0192653	0.0207072	0.0202288	0.0193343	0.0187114	0.0187143	0.018837	0.0193691	0.0196291	0.0198648	0.0203747	0.0206701
[truncated: 3,373 more rows]
